# Supplementary material for: Oxidative stress accelerates intestinal tumorigenesis by enhancing 8-oxoguanine-mediated mutagenesis in MUTYH-deficient mice
Source: HighWire-hosted journal article supplement (doi:10.1101/gr.278326.123), 2024-01-01
Supplement: Supplemental_Table_S1_S2.xlsx [file Supplemental_Table_S1_S2.xlsx]

## Sheet: Table_S1 Speaman  
Supplemental Table S1. Spearman’s rank correlation (ρ-value, p-value) Correlations between KBrO3 dose and tumor frequency, KBrO3 dose and mutation frequencies, and mutation frequencies and tumor frequencies were examined using Spearman’s rank correlation test. Total mutation frequency and by-mutation type frequency were used. The results are summarized based on mice genotypes.
		Mutyh-/-		Mutyh+/+		Mutyh+/-
factor 1	vs. factor 2	correlation coefficient (ρ)	p-value	correlation coefficient (ρ)	p-value	correlation coefficient (ρ)	p-value
KBrO3 dose	Tumor Frequency	0.9028	<0.0001*	0.5815	<0.0001*	0.5865	<0.0001*
	Total MF	0.5413	0.0076*	0.3225	0.1655	-	-
	MF(G:C>T:A)	0.7654	<0.0001*	0.372	0.1063	-	-
	MF(A:T>C:G)	.	.	-0.0203	0.9323	-	-
	MF(A:T>G:C)	-0.1514	0.4905	0.2815	0.2293	-	-
	MF(A:T>T:A)	-0.4291	0.0410*	-0.3250	0.1621	-	-
	MF(G:C>A:T)	-0.2459	0.2581	0.0324	0.8921	-	-
	MF(G:C>C:G)	-0.2125	0.3303	-0.0295	0.9018	-	-
	MF(indel)	0.106	0.6304	0.0968	0.6849	-	-
Tumor Frequency	Total MF	0.4555	0.0289*	0.2549	0.2782	-	-
	MF(G:C>T:A)	0.6976	0.0002*	0.2544	0.279	-	-
	MF(A:T>C:G)	.	.	-0.2012	0.395	-	-
	MF(A:T>G:C)	-0.0819	0.7102	0.3098	0.1837	-	-
	MF(A:T>T:A)	-0.3355	0.1176	-0.2012	0.395	-	-
	MF(G:C>A:T)	-0.2968	0.169	0.0325	0.8918	-	-
	MF(G:C>C:G)	-0.1980	0.3652	-0.0146	0.9513	-	-
	MF(indel)	-0.0028	0.9899	-0.0304	0.8987	-	-
	MF: Mutation Frequency
	* significant difference

## Sheet: Table S2 MFall
Supplemental Table S2. Results of the rpsL mutation assay The raw data for the rpsL mutation assay for each mouse have been summarized.
KBrO3 (%)	Mouse ID	Sex	Mutyh genotype	Kmr clones screened (x 105)	KmrSmr clones	Mutant frequency (x 10-5)	Mean Mutant frequency (x 10-5)	SD
0	1305	m	+/+	3.35	3	0.9
0	1411	f	+/+	1.28	1	0.78
0	1364	f	+/+	1.79	3	1.68
0	1366	f	+/+	4.83	11	2.28	1.41	0.71
0.05	2189	m	+/+	1.53	3	1.97
0.05	2227	f	+/+	3.82	6	1.57
0.05	2229	f	+/+	5.38	12	2.23	1.92	0.33
0.1	1167	m	+/+	5.01	15	2.99
0.1	1200	f	+/+	5.75	22	3.83
0.1	1264	m	+/+	1.98	2	1.01
0.1	1465	m	+/+	7.14	17	2.38
0.1	1466	m	+/+	8.23	12	1.46	2.33	1.14
0.15	1134	m	+/+	1.96	7	3.58
0.15	1135	f	+/+	2.43	7	2.88
0.15	1291	m	+/+	4.82	11	2.28
0.15	1297	f	+/+	4.26	8	1.88	2.65	0.74
0.2	1397	m	+/+	2.21	4	1.81
0.2	1484	f	+/+	2.09	2	0.96
0.2	1486	m	+/+	1.56	3	1.92
0.2	1487	m	+/+	1.07	5	4.67	2.34	1.61
0	1281	f	-/-	4.78	8	1.67
0	1303	f	-/-	2.79	5	1.79
0	1307	m	-/-	4.42	10	2.26
0	1443	m	-/-	3.88	7	1.8
0	1456	m	-/-	4.65	13	2.8	2.07	0.47
0.05	1174	m	-/-	7.14	31	4.34
0.05	1257	m	-/-	6.01	29	4.83
0.05	1271	m	-/-	5.98	16	2.68
0.05	1272	m	-/-	2.11	7	3.31	3.79	0.97
0.1	1165	m	-/-	2.11	8	3.79
0.1	1196	m	-/-	6.02	43	7.15
0.1	1262	m	-/-	1.53	2	1.31
0.1	1268	f	-/-	2.11	10	4.74
0.1	1467	f	-/-	6.64	49	7.37
0.1	1470	f	-/-	1.67	5	2.99	4.56	2.38
0.15	1141	f	-/-	1.2	7	5.83
0.15	1223	f	-/-	1	2	2
0.15	1230	m	-/-	4.19	16	3.82
0.15	1299	f	-/-	2.6	16	6.16
0.15	1379	m	-/-	3.47	22	6.34
0.15	1384	m	-/-	2.4	9	3.76	4.65	1.73
0.2	1374	m	-/-	2.71	12	4.43
0.2	1377	m	-/-	4.88	24	4.91	4.67	0.34
