# Supplementary material for: Oxidative stress accelerates intestinal tumorigenesis by enhancing 8-oxoguanine-mediated mutagenesis in MUTYH-deficient mice
Source: HighWire-hosted journal article supplement (doi:10.1101/gr.278326.123), 2024-01-01
Supplement: Supplemental_Table_S3.xlsx [file Supplemental_Table_S3.xlsx]

## Sheet: README 
Supplemental Table S3. Somatic mutations in the tumors detected using WES Somatic mutations detected in four tumors (ID# RY1114T6, RY1114T7, RY1115T2, and RY1115T6) using the GATK Mutect2 normal-tumor mode are listed in sheet “integrated” and filter summary and the number of extracted mutations is in sheet “Filterd_PASS.” Data from heart sample of each mouse was used as normal reference. The file…

## Sheet: Variants_mm10
Supplemental Table S3. Somatic mutations in the tumors detected using WES (mm10)
##fileformat=VCFv4.2
##FILTER=<ID=FAIL,Description="Fail the site if all alleles fail but for different reasons.">
##FILTER=<ID=PASS,Description="Site contains at least one allele that passes filters">
##FILTER=<ID=base_qual,Description="alt median base quality">
##FILTER=<ID=clustered_events,Description="Clustered events observed in the tumor">
##FILTER=<ID=contamination,Description="contamination">
##FILTER=<ID=duplicate,Description="evidence for alt allele is overrepresented by apparent duplicates">
##FILTER=<ID=fragment,Description="abs(ref - alt) median fragment length">
##FILTER=<ID=germline,Description="Evidence indicates this site is germline, not somatic">
##FILTER=<ID=haplotype,Description="Variant near filtered variant on same haplotype.">
##FILTER=<ID=low_allele_frac,Description="Allele fraction is below specified threshold">
##FILTER=<ID=map_qual,Description="ref - alt median mapping quality">
##FILTER=<ID=multiallelic,Description="Site filtered because too many alt alleles pass tumor LOD">
##FILTER=<ID=n_ratio,Description="Ratio of N to alt exceeds specified ratio">
##FILTER=<ID=normal_artifact,Description="artifact_in_normal">
##FILTER=<ID=orientation,Description="orientation bias detected by the orientation bias mixture model">
##FILTER=<ID=panel_of_normals,Description="Blacklisted site in panel of normals">
##FILTER=<ID=position,Description="median distance of alt variants from end of reads">
##FILTER=<ID=possible_numt,Description="Allele depth is below expected coverage of NuMT in autosome">
##FILTER=<ID=slippage,Description="Site filtered due to contraction of short tandem repeat region">
##FILTER=<ID=strand_bias,Description="Evidence for alt allele comes from one read direction only">
##FILTER=<ID=strict_strand,Description="Evidence for alt allele is not represented in both directions">
##FILTER=<ID=weak_evidence,Description="Mutation does not meet likelihood threshold">
##FORMAT=<ID=AD,Number=R,Type=Integer,Description="Allelic depths for the ref and alt alleles in the order listed">
##FORMAT=<ID=AF,Number=A,Type=Float,Description="Allele fractions of alternate alleles in the tumor">
##FORMAT=<ID=DP,Number=1,Type=Integer,Description="Approximate read depth (reads with MQ=255 or with bad mates are filtered)">
##FORMAT=<ID=F1R2,Number=R,Type=Integer,Description="Count of reads in F1R2 pair orientation supporting each allele">
##FORMAT=<ID=F2R1,Number=R,Type=Integer,Description="Count of reads in F2R1 pair orientation supporting each allele">
##FORMAT=<ID=GQ,Number=1,Type=Integer,Description="Genotype Quality">
##FORMAT=<ID=GT,Number=1,Type=String,Description="Genotype">
##FORMAT=<ID=PGT,Number=1,Type=String,Description="Physical phasing haplotype information, describing how the alternate alleles are phased in relation to one another; will always be heterozygous and is not intended to describe called alleles">
##FORMAT=<ID=PID,Number=1,Type=String,Description="Physical phasing ID information, where each unique ID within a given sample (but not across samples) connects records within a phasing group">
##FORMAT=<ID=PL,Number=G,Type=Integer,Description="Normalized, Phred-scaled likelihoods for genotypes as defined in the VCF specification">
##FORMAT=<ID=PS,Number=1,Type=Integer,Description="Phasing set (typically the position of the first variant in the set)">
##FORMAT=<ID=SB,Number=4,Type=Integer,Description="Per-sample component statistics which comprise the Fisher's Exact Test to detect strand bias.">
##GATKCommandLine=<ID=FilterMutectCalls,CommandLine="FilterMutectCalls --output RY1114/results/Mutect2/RY1114T6_H.m2.filt.vcf --variant RY1114/results/Mutect2/RY1114T6_H.m2.vcf --reference /Volumes/NGS02/Data_public/mm10.fa --threshold-strategy OPTIMAL_F_SCORE --f-score-beta 1.0 --false-discovery-rate 0.05 --initial-threshold 0.1 --mitochondria-mode false --max-events-in-region 2 --max-alt-allele…
##GATKCommandLine=<ID=FilterMutectCalls,CommandLine="FilterMutectCalls --output RY1114/results/Mutect2/RY1114T7_H.m2.filt.vcf --variant RY1114/results/Mutect2/RY1114T7_H.m2.vcf --reference /Volumes/NGS02/Data_public/mm10.fa --threshold-strategy OPTIMAL_F_SCORE --f-score-beta 1.0 --false-discovery-rate 0.05 --initial-threshold 0.1 --mitochondria-mode false --max-events-in-region 2 --max-alt-allele…
##GATKCommandLine=<ID=FilterMutectCalls,CommandLine="FilterMutectCalls --output RY1115/results/Mutect2/RY1115T2_H.m2.filt.vcf --variant RY1115/results/Mutect2/RY1115T2_H.m2.vcf --reference /Volumes/NGS02/Data_public/mm10.fa --threshold-strategy OPTIMAL_F_SCORE --f-score-beta 1.0 --false-discovery-rate 0.05 --initial-threshold 0.1 --mitochondria-mode false --max-events-in-region 2 --max-alt-allele…
##GATKCommandLine=<ID=FilterMutectCalls,CommandLine="FilterMutectCalls --output RY1115/results/Mutect2/RY1115T6_H.m2.filt.vcf --variant RY1115/results/Mutect2/RY1115T6_H.m2.vcf --reference /Volumes/NGS02/Data_public/mm10.fa --threshold-strategy OPTIMAL_F_SCORE --f-score-beta 1.0 --false-discovery-rate 0.05 --initial-threshold 0.1 --mitochondria-mode false --max-events-in-region 2 --max-alt-allele…
##GATKCommandLine=<ID=Mutect2,CommandLine="Mutect2 --normal-sample H --bam-output RY1114/results/Mutect2/RY1114T6_H.m2.bam --output RY1114/results/Mutect2/RY1114T6_H.m2.vcf --input RY1114/results/bam/RY1114_T6.bam --input RY1114/results/bam/RY1114_H.bam --reference /Volumes/NGS02/Data_public/mm10.fa --f1r2-median-mq 50 --f1r2-min-bq 20 --f1r2-max-depth 200 --genotype-pon-sites false --genotype-ge…
##GATKCommandLine=<ID=Mutect2,CommandLine="Mutect2 --normal-sample H --bam-output RY1114/results/Mutect2/RY1114T7_H.m2.bam --output RY1114/results/Mutect2/RY1114T7_H.m2.vcf --input RY1114/results/bam/RY1114_T7.bam --input RY1114/results/bam/RY1114_H.bam --reference /Volumes/NGS02/Data_public/mm10.fa --f1r2-median-mq 50 --f1r2-min-bq 20 --f1r2-max-depth 200 --genotype-pon-sites false --genotype-ge…
##GATKCommandLine=<ID=Mutect2,CommandLine="Mutect2 --normal-sample H --bam-output RY1115/results/Mutect2/RY1115T2_H.m2.bam --output RY1115/results/Mutect2/RY1115T2_H.m2.vcf --input RY1115/results/bam/RY1115_T2.bam --input RY1115/results/bam/RY1115_H.bam --reference /Volumes/NGS02/Data_public/mm10.fa --f1r2-median-mq 50 --f1r2-min-bq 20 --f1r2-max-depth 200 --genotype-pon-sites false --genotype-ge…
##GATKCommandLine=<ID=Mutect2,CommandLine="Mutect2 --normal-sample H --bam-output RY1115/results/Mutect2/RY1115T6_H.m2.bam --output RY1115/results/Mutect2/RY1115T6_H.m2.vcf --input RY1115/results/bam/RY1115_T6.bam --input RY1115/results/bam/RY1115_H.bam --reference /Volumes/NGS02/Data_public/mm10.fa --f1r2-median-mq 50 --f1r2-min-bq 20 --f1r2-max-depth 200 --genotype-pon-sites false --genotype-ge…
##INFO=<ID=AS_FilterStatus,Number=A,Type=String,Description="Filter status for each allele, as assessed by ApplyVQSR. Note that the VCF filter field will reflect the most lenient/sensitive status across all alleles.">
##INFO=<ID=AS_SB_TABLE,Number=1,Type=String,Description="Allele-specific forward/reverse read counts for strand bias tests. Includes the reference and alleles separated by |.">
##INFO=<ID=AS_UNIQ_ALT_READ_COUNT,Number=A,Type=Integer,Description="Number of reads with unique start and mate end positions for each alt at a variant site">
##INFO=<ID=CONTQ,Number=1,Type=Float,Description="Phred-scaled qualities that alt allele are not due to contamination">
##INFO=<ID=DP,Number=1,Type=Integer,Description="Approximate read depth; some reads may have been filtered">
##INFO=<ID=ECNT,Number=1,Type=Integer,Description="Number of events in this haplotype">
##INFO=<ID=GERMQ,Number=1,Type=Integer,Description="Phred-scaled quality that alt alleles are not germline variants">
##INFO=<ID=MBQ,Number=R,Type=Integer,Description="median base quality">
##INFO=<ID=MFRL,Number=R,Type=Integer,Description="median fragment length">
##INFO=<ID=MMQ,Number=R,Type=Integer,Description="median mapping quality">
##INFO=<ID=MPOS,Number=A,Type=Integer,Description="median distance from end of read">
##INFO=<ID=NALOD,Number=A,Type=Float,Description="Negative log 10 odds of artifact in normal with same allele fraction as tumor">
##INFO=<ID=NCount,Number=1,Type=Integer,Description="Count of N bases in the pileup">
##INFO=<ID=NLOD,Number=A,Type=Float,Description="Normal log 10 likelihood ratio of diploid het or hom alt genotypes">
##INFO=<ID=OCM,Number=1,Type=Integer,Description="Number of alt reads whose original alignment doesn't match the current contig.">
##INFO=<ID=PON,Number=0,Type=Flag,Description="site found in panel of normals">
##INFO=<ID=POPAF,Number=A,Type=Float,Description="negative log 10 population allele frequencies of alt alleles">
##INFO=<ID=ROQ,Number=1,Type=Float,Description="Phred-scaled qualities that alt allele are not due to read orientation artifact">
##INFO=<ID=RPA,Number=R,Type=Integer,Description="Number of times tandem repeat unit is repeated, for each allele (including reference)">
##INFO=<ID=RU,Number=1,Type=String,Description="Tandem repeat unit (bases)">
##INFO=<ID=SEQQ,Number=1,Type=Integer,Description="Phred-scaled quality that alt alleles are not sequencing errors">
##INFO=<ID=STR,Number=0,Type=Flag,Description="Variant is a short tandem repeat">
##INFO=<ID=STRANDQ,Number=1,Type=Integer,Description="Phred-scaled quality of strand bias artifact">
##INFO=<ID=STRQ,Number=1,Type=Integer,Description="Phred-scaled quality that alt alleles in STRs are not polymerase slippage errors">
##INFO=<ID=TLOD,Number=A,Type=Float,Description="Log 10 likelihood ratio score of variant existing versus not existing">
##MutectVersion=2.2
##contig=<ID=chr1,length=195471971>
##contig=<ID=chr10,length=130694993>
##contig=<ID=chr11,length=122082543>
##contig=<ID=chr12,length=120129022>
##contig=<ID=chr13,length=120421639>
##contig=<ID=chr14,length=124902244>
##contig=<ID=chr15,length=104043685>
##contig=<ID=chr16,length=98207768>
##contig=<ID=chr17,length=94987271>
##contig=<ID=chr18,length=90702639>
##contig=<ID=chr19,length=61431566>
##contig=<ID=chr1_GL456210_random,length=169725>
##contig=<ID=chr1_GL456211_random,length=241735>
##contig=<ID=chr1_GL456212_random,length=153618>
##contig=<ID=chr1_GL456213_random,length=39340>
##contig=<ID=chr1_GL456221_random,length=206961>
##contig=<ID=chr2,length=182113224>
##contig=<ID=chr3,length=160039680>
##contig=<ID=chr4,length=156508116>
##contig=<ID=chr4_GL456216_random,length=66673>
##contig=<ID=chr4_GL456350_random,length=227966>
##contig=<ID=chr4_JH584292_random,length=14945>
##contig=<ID=chr4_JH584293_random,length=207968>
##contig=<ID=chr4_JH584294_random,length=191905>
##contig=<ID=chr4_JH584295_random,length=1976>
##contig=<ID=chr5,length=151834684>
##contig=<ID=chr5_GL456354_random,length=195993>
##contig=<ID=chr5_JH584296_random,length=199368>
##contig=<ID=chr5_JH584297_random,length=205776>
##contig=<ID=chr5_JH584298_random,length=184189>
##contig=<ID=chr5_JH584299_random,length=953012>
##contig=<ID=chr6,length=149736546>
##contig=<ID=chr7,length=145441459>
##contig=<ID=chr7_GL456219_random,length=175968>
##contig=<ID=chr8,length=129401213>
##contig=<ID=chr9,length=124595110>
##contig=<ID=chrM,length=16299>
##contig=<ID=chrUn_GL456239,length=40056>
##contig=<ID=chrUn_GL456359,length=22974>
##contig=<ID=chrUn_GL456360,length=31704>
##contig=<ID=chrUn_GL456366,length=47073>
##contig=<ID=chrUn_GL456367,length=42057>
##contig=<ID=chrUn_GL456368,length=20208>
##contig=<ID=chrUn_GL456370,length=26764>
##contig=<ID=chrUn_GL456372,length=28664>
##contig=<ID=chrUn_GL456378,length=31602>
##contig=<ID=chrUn_GL456379,length=72385>
##contig=<ID=chrUn_GL456381,length=25871>
##contig=<ID=chrUn_GL456382,length=23158>
##contig=<ID=chrUn_GL456383,length=38659>
##contig=<ID=chrUn_GL456385,length=35240>
##contig=<ID=chrUn_GL456387,length=24685>
##contig=<ID=chrUn_GL456389,length=28772>
##contig=<ID=chrUn_GL456390,length=24668>
##contig=<ID=chrUn_GL456392,length=23629>
##contig=<ID=chrUn_GL456393,length=55711>
##contig=<ID=chrUn_GL456394,length=24323>
##contig=<ID=chrUn_GL456396,length=21240>
##contig=<ID=chrUn_JH584304,length=114452>
##contig=<ID=chrX,length=171031299>
##contig=<ID=chrX_GL456233_random,length=336933>
##contig=<ID=chrY,length=91744698>
##contig=<ID=chrY_JH584300_random,length=182347>
##contig=<ID=chrY_JH584301_random,length=259875>
##contig=<ID=chrY_JH584302_random,length=155838>
##contig=<ID=chrY_JH584303_random,length=158099>
##filtering_status=These calls have been filtered by FilterMutectCalls to label false positives with a list of failed filters and true positives with PASS.
##normal_sample=H
##source=FilterMutectCalls
##source=Mutect2
##tumor_sample=T2
##tumor_sample=T6
##tumor_sample=T7
##SnpSiftVersion="SnpSift 5.1d (build 2022-04-19 15:50), by Pablo Cingolani"
##SnpSiftCmd="SnpSift Annotate /Users/hidaka/Documents/NGS_data_public/dbsnp/MGP_v5_snp_and_indels.exclude_wild.vcf.gz tmp1.vcf"
##INFO=<ID=DP4,Number=4,Type=Integer,Description="Total Number of high-quality ref-fwd, ref-reverse, alt-fwd and alt-reverse bases">
##INFO=<ID=INDEL,Number=0,Type=Flag,Description="Indicates that the variant is an INDEL.">
##INFO=<ID=CSQ,Number=.,Type=String,Description="Consequence type from Ensembl 78 as predicted by VEP. Format: Allele|Gene|Feature|Feature_type|Consequence|cDNA_position|CDS_position|Protein_position|Amino_acids|Codons|Existing_variation|DISTANCE|STRAND">
##SnpEffVersion="5.1d (build 2022-04-19 15:49), by Pablo Cingolani"
##SnpEffCmd="SnpEff GRCm38.75 tmp3.vcf "
##INFO=<ID=ANN,Number=.,Type=String,Description="Functional annotations: 'Allele | Annotation | Annotation_Impact | Gene_Name | Gene_ID | Feature_Type | Feature_ID | Transcript_BioType | Rank | HGVS.c | HGVS.p | cDNA.pos / cDNA.length | CDS.pos / CDS.length | AA.pos / AA.length | Distance | ERRORS / WARNINGS / INFO' ">
##INFO=<ID=LOF,Number=.,Type=String,Description="Predicted loss of function effects for this variant. Format: 'Gene_Name | Gene_ID | Number_of_transcripts_in_gene | Percent_of_transcripts_affected'">
##INFO=<ID=NMD,Number=.,Type=String,Description="Predicted nonsense mediated decay effects for this variant. Format: 'Gene_Name | Gene_ID | Number_of_transcripts_in_gene | Percent_of_transcripts_affected'">
## Integrated files are from RY1114T6 RY1114T7 RY1115T2 RY1115T6_H.m2.filt
## column1-11: VCF format
## column12: name of sample
## column13: mutation ID (Chr_POS_REF>ALT)
## column14-15: depth of normal REF, ALT
## column16-17: depth of tumor REF, ALT
## column18: consequence of mutation
## column19: affected gene
## column20: impact of mutation
## column21: hard filter (normal and tumor depth >= 10, normal ALT depth = 0, tumor ALT depth >= 3)
## column22: mutation type
## column23: change in single base pair
## column24: change in Watson-Crick base pair
## column25: number of mutations with the same mutID
## column26: pass all filters
#CHROM	POS	ID	REF	ALT	QUAL	FILTER	INFO	FORMAT	normal	tumor	sample	mutID	nRef	nAlt	tRef	tAlt	conseq	impact	gene	hardFilter	type	change	changeWC	count	passALL
chr1	4782773	.	A	G	.	weak_evidence	AS_FilterStatus=weak_evidence;AS_SB_TABLE=3,14|1,1;DP=20;ECNT=1;GERMQ=27;MBQ=34,20;MFRL=153,149;MMQ=60,60;MPOS=26;NALOD=1.11;NLOD=3.61;POPAF=6.00;TLOD=3.80;ANN=G|intron_variant|MODIFIER|Mrpl15|ENSMUSG00000033845|transcript|ENSMUST00000156816|protein_coding|2/4|c.261-40T>C||||||	GT:AD:AF:DP:F1R2:F2R1:SB	0/0:15,0:0.071:15:4,0:11,0:3,12,0,0	0/1:2,2:0.396:4:2,0:0,2:0,2,1,1	RY1114T6	chr1_4782773_A>G	15	0	2	2	intron_variant	MODIFIER	Mrpl15	.	snv	A>G	A:T>G:C	1	.
chr1	6440063	.	C	CT	.	haplotype;normal_artifact;slippage;weak_evidence	AS_FilterStatus=weak_evidence;AS_SB_TABLE=10,9|2,1;DP=48;ECNT=2;GERMQ=9;MBQ=35,36;MFRL=175,164;MMQ=60,60;MPOS=18;NALOD=0.855;NLOD=4.25;POPAF=6.00;RPA=16,17;RU=T;STR;STRQ=1;TLOD=4.44;ANN=CT|intergenic_region|MODIFIER|Fam150a-St18|ENSMUSG00000087247-ENSMUSG00000033740|intergenic_region|ENSMUSG00000087247-ENSMUSG00000033740|||n.6440063_6440064insT||||||	GT:AD:AF:DP:F1R2:F2R1:PGT:PID:PS:SB	0|0:14,1:0.050:15:10,1:0,0:0|1:6440063_C_CT:6440063:10,4,1,0	0|1:5,2:0.315:7:4,2:0,0:0|1:6440063_C_CT:6440063:0,5,1,1	RY1114T6	chr1_6440063_C>CT	14	1	5	2	intergenic_region	MODIFIER	Fam150a-St18	.	indel	.	.	1	.
chr1	6440080	.	A	T	.	base_qual;haplotype;weak_evidence	AS_FilterStatus=weak_evidence,base_qual;AS_SB_TABLE=29,12|2,1;DP=44;ECNT=2;GERMQ=93;MBQ=32,16;MFRL=161,164;MMQ=60,60;MPOS=25;NALOD=1.16;NLOD=8.12;POPAF=6.00;TLOD=3.85;ANN=T|intergenic_region|MODIFIER|Fam150a-St18|ENSMUSG00000087247-ENSMUSG00000033740|intergenic_region|ENSMUSG00000087247-ENSMUSG00000033740|||n.6440080A>T||||||	GT:AD:AF:DP:F1R2:F2R1:PGT:PID:PS:SB	0|0:29,1:0.034:30:18,0:5,0:0|1:6440063_C_CT:6440063:22,7,1,0	0|1:12,2:0.186:14:5,1:3,0:0|1:6440063_C_CT:6440063:7,5,1,1	RY1114T6	chr1_6440080_A>T	29	1	12	2	intergenic_region	MODIFIER	Fam150a-St18	.	snv	A>T	A:T>T:A	1	.
chr1	6770936	.	G	T	.	base_qual;normal_artifact;strand_bias	AS_FilterStatus=base_qual,strand_bias;AS_SB_TABLE=47,23|10,0;DP=98;ECNT=1;GERMQ=93;MBQ=36,18;MFRL=141,160;MMQ=60,60;MPOS=28;NALOD=-3.573e-01;NLOD=5.18;POPAF=6.00;TLOD=7.25;ANN=T|splice_region_variant&intron_variant|LOW|St18|ENSMUSG00000033740|transcript|ENSMUST00000043578|protein_coding|5/23|c.56-8G>T||||||	GT:AD:AF:DP:F1R2:F2R1:SB	0/0:35,6:0.066:41:17,2:16,1:22,13,6,0	0/1:35,4:0.123:39:14,2:19,0:25,10,4,0	RY1114T6	chr1_6770936_G>T	35	6	35	4	splice_region_variant&intron_variant	LOW	St18	.	snv	G>T	G:C>T:A	1	.
chr1	8682358	.	GCA	G	.	normal_artifact;slippage;weak_evidence	AS_FilterStatus=weak_evidence;AS_SB_TABLE=53,67|3,7;DP=161;ECNT=1;GERMQ=93;MBQ=20,20;MFRL=144,148;MMQ=60,60;MPOS=32;NALOD=-5.431e+00;NLOD=3.03;POPAF=6.00;RPA=10,9;RU=CA;STR;STRQ=1;TLOD=5.15;ANN=G|intron_variant|MODIFIER|Sntg1|ENSMUSG00000025909|transcript|ENSMUST00000140295|protein_coding|6/20|c.196-331_196-330delTG||||||	GT:AD:AF:DP:F1R2:F2R1:SB	0/0:69,6:0.089:75:29,4:39,2:29,40,2,4	0/1:51,4:0.092:55:12,1:36,3:24,27,1,3	RY1114T6	chr1_8682358_GCA>G	69	6	51	4	intron_variant	MODIFIER	Sntg1	.	indel	.	.	3	.
chr1	9397454	.	G	A	.	weak_evidence	AS_FilterStatus=weak_evidence;AS_SB_TABLE=4,26|1,1;DP=33;ECNT=1;GERMQ=65;MBQ=35,20;MFRL=156,144;MMQ=60,60;MPOS=28;NALOD=1.30;NLOD=5.72;POPAF=6.00;TLOD=3.02;ANN=A|intergenic_region|MODIFIER|Sntg1-Gm24765|ENSMUSG00000025909-ENSMUSG00000065625|intergenic_region|ENSMUSG00000025909-ENSMUSG00000065625|||n.9397454G>A||||||	GT:AD:AF:DP:F1R2:F2R1:SB	0/0:21,0:0.048:21:8,0:13,0:2,19,0,0	0/1:9,2:0.195:11:9,0:0,2:2,7,1,1	RY1114T6	chr1_9397454_G>A	21	0	9	2	intergenic_region	MODIFIER	Sntg1-Gm24765	.	snv	G>A	G:C>A:T	1	.
chr1	9546372	.	C	T	.	strand_bias	AS_FilterStatus=strand_bias;AS_SB_TABLE=39,39|0,3;DP=82;ECNT=2;GERMQ=93;MBQ=20,37;MFRL=142,165;MMQ=60,40;MPOS=30;NALOD=1.45;NLOD=8.13;POPAF=6.00;TLOD=8.46;ANN=T|synonymous_variant|LOW|Rrs1|ENSMUSG00000061024|transcript|ENSMUST00000072079|protein_coding|1/1|c.849C>T|p.Asp283Asp|965/2047|849/1098|283/365||,T|upstream_gene_variant|MODIFIER|Adhfe1|ENSMUSG00000025911|transcript|ENSMUST00000144177|prot…	GT:AD:AF:DP:F1R2:F2R1:PGT:PID:PS:SB	0|0:41,0:0.034:41:12,0:27,0:0|1:9546372_C_T:9546372:21,20,0,0	0|1:37,3:0.129:40:12,0:22,3:0|1:9546372_C_T:9546372:18,19,0,3	RY1114T6	chr1_9546372_C>T	41	0	37	3	synonymous_variant	LOW	Rrs1	PASS	snv	C>T	G:C>A:T	1	.
chr1	9546377	.	C	T	.	strand_bias	AS_FilterStatus=strand_bias;AS_SB_TABLE=39,42|0,2;DP=84;ECNT=2;GERMQ=93;MBQ=20,37;MFRL=142,171;MMQ=60,40;MPOS=27;NALOD=1.45;NLOD=8.13;POPAF=6.00;TLOD=4.91;ANN=T|missense_variant|MODERATE|Rrs1|ENSMUSG00000061024|transcript|ENSMUST00000072079|protein_coding|1/1|c.854C>T|p.Thr285Met|970/2047|854/1098|285/365||,T|upstream_gene_variant|MODIFIER|Adhfe1|ENSMUSG00000025911|transcript|ENSMUST00000144177|p…	GT:AD:AF:DP:F1R2:F2R1:PGT:PID:PS:SB	0|0:43,0:0.034:43:14,0:26,0:0|1:9546372_C_T:9546372:21,22,0,0	0|1:38,2:0.097:40:15,0:23,2:0|1:9546372_C_T:9546372:18,20,0,2	RY1114T6	chr1_9546377_C>T	43	0	38	2	missense_variant	MODERATE	Rrs1	.	snv	C>T	G:C>A:T	1	.
chr1	9546452	.	G	A	.	strand_bias;weak_evidence	AS_FilterStatus=weak_evidence,strand_bias;AS_SB_TABLE=11,31|2,0;DP=45;ECNT=2;GERMQ=85;MBQ=35,37;MFRL=145,105;MMQ=60,57;MPOS=6;NALOD=1.31;NLOD=5.72;POPAF=6.00;TLOD=4.71;ANN=A|missense_variant|MODERATE|Rrs1|ENSMUSG00000061024|transcript|ENSMUST00000072079|protein_coding|1/1|c.929G>A|p.Gly310Asp|1045/2047|929/1098|310/365||,A|upstream_gene_variant|MODIFIER|Adhfe1|ENSMUSG00000025911|transcript|ENSMUS…	GT:AD:AF:DP:F1R2:F2R1:SB	0/0:25,0:0.047:25:7,0:18,0:7,18,0,0	0/1:17,2:0.176:19:8,2:9,0:4,13,2,0	RY1114T6	chr1_9546452_G>A	25	0	17	2	missense_variant	MODERATE	Rrs1	.	snv	G>A	G:C>A:T	2	.
chr1	9546588	.	A	T	.	strand_bias;weak_evidence	AS_FilterStatus=weak_evidence,strand_bias;AS_SB_TABLE=29,20|0,1;DP=50;ECNT=2;GERMQ=93;MBQ=35,36;MFRL=147,136;MMQ=60,40;MPOS=20;NALOD=1.30;NLOD=5.72;POPAF=6.00;TLOD=4.28;ANN=T|synonymous_variant|LOW|Rrs1|ENSMUSG00000061024|transcript|ENSMUST00000072079|protein_coding|1/1|c.1065A>T|p.Gly355Gly|1181/2047|1065/1098|355/365||,T|upstream_gene_variant|MODIFIER|Adhfe1|ENSMUSG00000025911|transcript|ENSMUS…	GT:AD:AF:DP:F1R2:F2R1:SB	0/0:23,0:0.048:23:8,0:15,0:13,10,0,0	0/1:26,1:0.100:27:8,1:16,0:16,10,0,1	RY1114T6	chr1_9546588_A>T	23	0	26	1	synonymous_variant	LOW	Rrs1	.	snv	A>T	A:T>T:A	1	.
chr1	10159638	.	G	A	.	clustered_events;haplotype	AS_FilterStatus=SITE;AS_SB_TABLE=233,201|1,2;DP=442;ECNT=8;GERMQ=93;MBQ=20,20;MFRL=148,123;MMQ=60,60;MPOS=33;NALOD=2.24;NLOD=52.37;POPAF=6.00;TLOD=6.18;ANN=A|synonymous_variant|LOW|Arfgef1|ENSMUSG00000067851|transcript|ENSMUST00000088615|protein_coding|26/38|c.3837C>T|p.Phe1279Phe|4013/6978|3837/5541|1279/1846||	GT:AD:AF:DP:F1R2:F2R1:PGT:PID:PS:SB	0|0:245,0:5.682e-03:245:79,0:157,0:0|1:10159638_G_A:10159638:129,116,0,0	0|1:189,3:0.020:192:50,3:132,0:0|1:10159638_G_A:10159638:104,85,1,2	RY1114T6	chr1_10159638_G>A	245	0	189	3	synonymous_variant	LOW	Arfgef1	PASS	snv	G>A	G:C>A:T	1	.
chr1	10159644	.	T	A	.	clustered_events;haplotype	AS_FilterStatus=SITE;AS_SB_TABLE=233,199|1,2;DP=444;ECNT=8;GERMQ=93;MBQ=20,20;MFRL=148,123;MMQ=60,60;MPOS=39;NALOD=2.24;NLOD=51.77;POPAF=6.00;TLOD=6.17;ANN=A|synonymous_variant|LOW|Arfgef1|ENSMUSG00000067851|transcript|ENSMUST00000088615|protein_coding|26/38|c.3831A>T|p.Ser1277Ser|4007/6978|3831/5541|1277/1846||	GT:AD:AF:DP:F1R2:F2R1:PGT:PID:PS:SB	0|0:241,0:5.747e-03:241:76,0:160,0:0|1:10159638_G_A:10159638:125,116,0,0	0|1:191,3:0.020:194:53,2:135,0:0|1:10159638_G_A:10159638:108,83,1,2	RY1114T6	chr1_10159644_T>A	241	0	191	3	synonymous_variant	LOW	Arfgef1	PASS	snv	T>A	A:T>T:A	1	.
chr1	10159665	.	T	A	.	clustered_events;haplotype	AS_FilterStatus=SITE;AS_SB_TABLE=208,234|1,3;DP=455;ECNT=8;GERMQ=93;MBQ=20,29;MFRL=148,132;MMQ=60,60;MPOS=36;NALOD=2.21;NLOD=47.56;POPAF=6.00;TLOD=10.04;ANN=A|synonymous_variant|LOW|Arfgef1|ENSMUSG00000067851|transcript|ENSMUST00000088615|protein_coding|26/38|c.3810A>T|p.Ser1270Ser|3986/6978|3810/5541|1270/1846||	GT:AD:AF:DP:F1R2:F2R1:PGT:PID:PS:SB	0|0:232,0:6.203e-03:232:67,0:158,0:0|1:10159665_T_A:10159665:103,129,0,0	0|1:210,4:0.026:214:52,4:152,0:0|1:10159665_T_A:10159665:105,105,1,3	RY1114T6	chr1_10159665_T>A	232	0	210	4	synonymous_variant	LOW	Arfgef1	PASS	snv	T>A	A:T>T:A	1	.
chr1	10159668	.	A	T	.	clustered_events;haplotype	AS_FilterStatus=SITE;AS_SB_TABLE=208,236|1,3;DP=448;ECNT=8;GERMQ=93;MBQ=20,29;MFRL=148,132;MMQ=60,60;MPOS=34;NALOD=2.21;NLOD=48.16;POPAF=6.00;TLOD=10.03;ANN=T|synonymous_variant|LOW|Arfgef1|ENSMUSG00000067851|transcript|ENSMUST00000088615|protein_coding|26/38|c.3807T>A|p.Arg1269Arg|3983/6978|3807/5541|1269/1846||	GT:AD:AF:DP:F1R2:F2R1:PGT:PID:PS:SB	0|0:232,0:6.157e-03:232:65,0:156,0:0|1:10159665_T_A:10159665:103,129,0,0	0|1:212,4:0.026:216:54,4:148,0:0|1:10159665_T_A:10159665:105,107,1,3	RY1114T6	chr1_10159668_A>T	232	0	212	4	synonymous_variant	LOW	Arfgef1	PASS	snv	A>T	A:T>T:A	1	.
chr1	10159674	.	A	G	.	clustered_events;haplotype	AS_FilterStatus=SITE;AS_SB_TABLE=196,242|1,3;DP=442;ECNT=8;GERMQ=93;MBQ=20,28;MFRL=149,132;MMQ=60,60;MPOS=28;NALOD=2.20;NLOD=47.26;POPAF=6.00;TLOD=10.01;ANN=G|synonymous_variant|LOW|Arfgef1|ENSMUSG00000067851|transcript|ENSMUST00000088615|protein_coding|26/38|c.3801T>C|p.Asn1267Asn|3977/6978|3801/5541|1267/1846||	GT:AD:AF:DP:F1R2:F2R1:PGT:PID:PS:SB	0|0:225,0:6.272e-03:225:58,0:154,0:0|1:10159665_T_A:10159665:97,128,0,0	0|1:213,4:0.025:217:53,4:148,0:0|1:10159665_T_A:10159665:99,114,1,3	RY1114T6	chr1_10159674_A>G	225	0	213	4	synonymous_variant	LOW	Arfgef1	PASS	snv	A>G	A:T>G:C	1	.
chr1	10159677	.	T	A	.	clustered_events;haplotype	AS_FilterStatus=SITE;AS_SB_TABLE=183,243|1,3;DP=430;ECNT=8;GERMQ=93;MBQ=20,29;MFRL=148,132;MMQ=60,60;MPOS=28;NALOD=2.20;NLOD=46.96;POPAF=6.00;TLOD=10.01;ANN=A|synonymous_variant|LOW|Arfgef1|ENSMUSG00000067851|transcript|ENSMUST00000088615|protein_coding|26/38|c.3798A>T|p.Ala1266Ala|3974/6978|3798/5541|1266/1846||	GT:AD:AF:DP:F1R2:F2R1:PGT:PID:PS:SB	0|0:217,0:6.312e-03:217:58,0:155,0:0|1:10159665_T_A:10159665:88,129,0,0	0|1:209,4:0.025:213:53,4:146,0:0|1:10159665_T_A:10159665:95,114,1,3	RY1114T6	chr1_10159677_T>A	217	0	209	4	synonymous_variant	LOW	Arfgef1	PASS	snv	T>A	A:T>T:A	1	.
chr1	10159683	.	C	T	.	clustered_events;haplotype	AS_FilterStatus=SITE;AS_SB_TABLE=172,237|1,3;DP=417;ECNT=8;GERMQ=93;MBQ=20,28;MFRL=147,132;MMQ=60,60;MPOS=28;NALOD=2.18;NLOD=45.15;POPAF=6.00;TLOD=10.03;ANN=T|synonymous_variant|LOW|Arfgef1|ENSMUSG00000067851|transcript|ENSMUST00000088615|protein_coding|26/38|c.3792G>A|p.Gln1264Gln|3968/6978|3792/5541|1264/1846||	GT:AD:AF:DP:F1R2:F2R1:PGT:PID:PS:SB	0|0:207,0:6.543e-03:207:55,0:149,0:0|1:10159665_T_A:10159665:82,125,0,0	0|1:202,4:0.026:206:51,4:148,0:0|1:10159665_T_A:10159665:90,112,1,3	RY1114T6	chr1_10159683_C>T	207	0	202	4	synonymous_variant	LOW	Arfgef1	PASS	snv	C>T	G:C>A:T	1	.
chr1	10159698	.	T	C	.	clustered_events;weak_evidence	AS_FilterStatus=weak_evidence;AS_SB_TABLE=149,236|1,3;DP=402;ECNT=8;GERMQ=93;MBQ=20,27;MFRL=147,132;MMQ=60,60;MPOS=18;NALOD=2.16;NLOD=41.75;POPAF=6.00;TLOD=4.99;ANN=C|synonymous_variant|LOW|Arfgef1|ENSMUSG00000067851|transcript|ENSMUST00000088615|protein_coding|26/38|c.3777A>G|p.Gln1259Gln|3953/6978|3777/5541|1259/1846||	GT:AD:AF:DP:F1R2:F2R1:SB	0/0:192,0:7.026e-03:192:52,0:137,0:74,118,0,0	0/1:193,4:0.026:197:52,4:138,0:75,118,1,3	RY1114T6	chr1_10159698_T>C	192	0	193	4	synonymous_variant	LOW	Arfgef1	PASS	snv	T>C	A:T>G:C	1	.
chr1	11223688	.	G	T	.	PASS	AS_FilterStatus=SITE;AS_SB_TABLE=76,45|8,2;DP=137;ECNT=1;GERMQ=93;MBQ=35,36;MFRL=158,154;MMQ=60,60;MPOS=12;NALOD=1.82;NLOD=19.26;POPAF=6.00;TLOD=24.92;ANN=T|intron_variant|MODIFIER|Prex2|ENSMUSG00000048960|transcript|ENSMUST00000027056|protein_coding|34/39|c.4208-7994G>T||||||	GT:AD:AF:DP:F1R2:F2R1:SB	0/0:84,0:0.015:84:44,0:40,0:53,31,0,0	0/1:37,10:0.219:47:17,8:20,2:23,14,8,2	RY1114T6	chr1_11223688_G>T	84	0	37	10	intron_variant	MODIFIER	Prex2	PASS	snv	G>T	G:C>T:A	1	PASS
chr1	12566004	.	C	A	.	PASS	AS_FilterStatus=SITE;AS_SB_TABLE=230,197|9,5;DP=458;ECNT=1;GERMQ=93;MBQ=20,20;MFRL=151,147;MMQ=60,60;MPOS=25;NALOD=2.32;NLOD=60.80;POPAF=6.00;TLOD=28.49;ANN=A|non_coding_transcript_exon_variant|MODIFIER|Gm2383|ENSMUSG00000097628|transcript|ENSMUST00000181461|processed_pseudogene|1/1|n.428C>A||||||	GT:AD:AF:DP:F1R2:F2R1:SB	0/0:279,0:4.822e-03:279:155,0:124,0:154,125,0,0	0/1:148,14:0.088:162:77,7:70,7:76,72,9,5	RY1114T6	chr1_12566004_C>A	279	0	148	14	non_coding_transcript_exon_variant	MODIFIER	Gm2383	PASS	snv	C>A	G:C>T:A	1	PASS
chr1	13167005	.	C	T	.	clustered_events;haplotype	AS_FilterStatus=SITE;AS_SB_TABLE=43,63|1,1;DP=112;ECNT=7;GERMQ=93;MBQ=33,37;MFRL=152,148;MMQ=60,60;MPOS=32;NALOD=1.69;NLOD=14.15;POPAF=6.00;TLOD=7.09;ANN=T|synonymous_variant|LOW|Ncoa2|ENSMUSG00000005886|transcript|ENSMUST00000006037|protein_coding|12/23|c.2496G>A|p.Gly832Gly|2718/4897|2496/4389|832/1462||	GT:AD:AF:DP:F1R2:F2R1:PGT:PID:PS:SB	0|0:62,0:0.020:62:22,0:39,0:0|1:13167005_C_T:13167005:23,39,0,0	0|1:44,2:0.079:46:23,2:21,0:0|1:13167005_C_T:13167005:20,24,1,1	RY1114T6	chr1_13167005_C>T	62	0	44	2	synonymous_variant	LOW	Ncoa2	.	snv	C>T	G:C>A:T	1	.
chr1	13167010	.	T	C	.	clustered_events;haplotype	AS_FilterStatus=SITE;AS_SB_TABLE=40,64|1,1;DP=106;ECNT=7;GERMQ=93;MBQ=32,38;MFRL=154,148;MMQ=60,60;MPOS=32;NALOD=1.66;NLOD=13.55;POPAF=6.00;TLOD=7.09;ANN=C|missense_variant|MODERATE|Ncoa2|ENSMUSG00000005886|transcript|ENSMUST00000006037|protein_coding|12/23|c.2491A>G|p.Thr831Ala|2713/4897|2491/4389|831/1462||	GT:AD:AF:DP:F1R2:F2R1:PGT:PID:PS:SB	0|0:59,0:0.021:59:22,0:35,0:0|1:13167005_C_T:13167005:20,39,0,0	0|1:45,2:0.079:47:22,2:20,0:0|1:13167005_C_T:13167005:20,25,1,1	RY1114T6	chr1_13167010_T>C	59	0	45	2	missense_variant	MODERATE	Ncoa2	.	snv	T>C	A:T>G:C	1	.
chr1	13167014	.	A	G	.	clustered_events;haplotype	AS_FilterStatus=SITE;AS_SB_TABLE=39,60|1,1;DP=101;ECNT=7;GERMQ=93;MBQ=20,37;MFRL=154,148;MMQ=60,60;MPOS=32;NALOD=1.65;NLOD=13.24;POPAF=6.00;TLOD=7.17;ANN=G|synonymous_variant|LOW|Ncoa2|ENSMUSG00000005886|transcript|ENSMUST00000006037|protein_coding|12/23|c.2487T>C|p.Ala829Ala|2709/4897|2487/4389|829/1462||	GT:AD:AF:DP:F1R2:F2R1:PGT:PID:PS:SB	0|0:56,0:0.022:56:19,0:29,0:0|1:13167005_C_T:13167005:19,37,0,0	0|1:43,2:0.083:45:23,2:20,0:0|1:13167005_C_T:13167005:20,23,1,1	RY1114T6	chr1_13167014_A>G	56	0	43	2	synonymous_variant	LOW	Ncoa2	.	snv	A>G	A:T>G:C	1	.
chr1	13167017	.	T	G	.	clustered_events;haplotype	AS_FilterStatus=SITE;AS_SB_TABLE=40,58|1,2;DP=101;ECNT=7;GERMQ=93;MBQ=20,34;MFRL=154,132;MMQ=60,60;MPOS=32;NALOD=1.62;NLOD=12.34;POPAF=6.00;TLOD=7.09;ANN=G|synonymous_variant|LOW|Ncoa2|ENSMUSG00000005886|transcript|ENSMUST00000006037|protein_coding|12/23|c.2484A>C|p.Gly828Gly|2706/4897|2484/4389|828/1462||	GT:AD:AF:DP:F1R2:F2R1:PGT:PID:PS:SB	0|0:52,0:0.023:52:20,0:32,0:0|1:13167005_C_T:13167005:18,34,0,0	0|1:46,3:0.079:49:24,2:18,0:0|1:13167005_C_T:13167005:22,24,1,2	RY1114T6	chr1_13167017_T>G	52	0	46	3	synonymous_variant	LOW	Ncoa2	PASS	snv	T>G	A:T>C:G	1	.
chr1	13167026	.	T	C	.	clustered_events;haplotype	AS_FilterStatus=SITE;AS_SB_TABLE=39,51|1,2;DP=94;ECNT=7;GERMQ=93;MBQ=33,20;MFRL=153,132;MMQ=60,60;MPOS=24;NALOD=1.54;NLOD=10.23;POPAF=6.00;TLOD=7.09;ANN=C|synonymous_variant|LOW|Ncoa2|ENSMUSG00000005886|transcript|ENSMUST00000006037|protein_coding|12/23|c.2475A>G|p.Thr825Thr|2697/4897|2475/4389|825/1462||	GT:AD:AF:DP:F1R2:F2R1:PGT:PID:PS:SB	0|0:45,0:0.028:45:18,0:27,0:0|1:13167005_C_T:13167005:17,28,0,0	0|1:45,3:0.079:48:23,3:19,0:0|1:13167005_C_T:13167005:22,23,1,2	RY1114T6	chr1_13167026_T>C	45	0	45	3	synonymous_variant	LOW	Ncoa2	PASS	snv	T>C	A:T>G:C	1	.
chr1	13167050	.	C	T	.	clustered_events;haplotype	AS_FilterStatus=SITE;AS_SB_TABLE=34,53|1,2;DP=92;ECNT=7;GERMQ=93;MBQ=34,20;MFRL=150,132;MMQ=60,60;MPOS=32;NALOD=1.53;NLOD=9.93;POPAF=6.00;TLOD=8.05;ANN=T|synonymous_variant|LOW|Ncoa2|ENSMUSG00000005886|transcript|ENSMUST00000006037|protein_coding|12/23|c.2451G>A|p.Gln817Gln|2673/4897|2451/4389|817/1462||	GT:AD:AF:DP:F1R2:F2R1:PGT:PID:PS:SB	0|0:44,0:0.029:44:18,0:25,0:0|1:13167050_C_T:13167050:18,26,0,0	0|1:43,3:0.073:46:19,3:24,0:0|1:13167050_C_T:13167050:16,27,1,2	RY1114T6	chr1_13167050_C>T	44	0	43	3	synonymous_variant	LOW	Ncoa2	PASS	snv	C>T	G:C>A:T	1	.
chr1	13167056	.	G	A	.	clustered_events;haplotype	AS_FilterStatus=SITE;AS_SB_TABLE=32,50|1,1;DP=86;ECNT=7;GERMQ=93;MBQ=35,20;MFRL=150,132;MMQ=60,60;MPOS=35;NALOD=1.49;NLOD=9.03;POPAF=6.00;TLOD=5.85;ANN=A|synonymous_variant|LOW|Ncoa2|ENSMUSG00000005886|transcript|ENSMUST00000006037|protein_coding|12/23|c.2445C>T|p.Asn815Asn|2667/4897|2445/4389|815/1462||	GT:AD:AF:DP:F1R2:F2R1:PGT:PID:PS:SB	0|0:41,0:0.031:41:17,0:24,0:0|1:13167050_C_T:13167050:17,24,0,0	0|1:41,2:0.051:43:17,2:23,0:0|1:13167050_C_T:13167050:15,26,1,1	RY1114T6	chr1_13167056_G>A	41	0	41	2	synonymous_variant	LOW	Ncoa2	.	snv	G>A	G:C>A:T	1	.
chr1	13436577	.	C	A	.	weak_evidence	AS_FilterStatus=weak_evidence;AS_SB_TABLE=6,10|1,1;DP=19;ECNT=1;GERMQ=28;MBQ=37,20;MFRL=157,106;MMQ=60,60;MPOS=9;NALOD=1.04;NLOD=3.01;POPAF=6.00;TLOD=3.39;ANN=A|intergenic_region|MODIFIER|Ncoa2-Tram1|ENSMUSG00000005886-ENSMUSG00000025935|intergenic_region|ENSMUSG00000005886-ENSMUSG00000025935|||n.13436577C>A||||||	GT:AD:AF:DP:F1R2:F2R1:SB	0/0:11,0:0.083:11:6,0:5,0:3,8,0,0	0/1:5,2:0.282:7:2,2:3,0:3,2,1,1	RY1114T6	chr1_13436577_C>A	11	0	5	2	intergenic_region	MODIFIER	Ncoa2-Tram1	.	snv	C>A	G:C>T:A	1	.
chr1	14756498	.	T	C	.	base_qual;clustered_events;haplotype;normal_artifact;strand_bias;weak_evidence	AS_FilterStatus=weak_evidence,base_qual,strand_bias;AS_SB_TABLE=12,46|5,0;DP=66;ECNT=4;GERMQ=81;MBQ=35,12;MFRL=141,228;MMQ=60,60;MPOS=26;NALOD=-1.591e+00;NLOD=3.93;POPAF=6.00;TLOD=4.21;ANN=C|3_prime_UTR_variant|MODIFIER|Gm9947|ENSMUSG00000054493|transcript|ENSMUST00000067599|protein_coding|1/1|c.*552T>C|||||552|WARNING_TRANSCRIPT_NO_START_CODON,C|upstream_gene_variant|MODIFIER|Msc|ENSMUSG00000025…	GT:AD:AF:DP:F1R2:F2R1:PGT:PID:PS:SB	0|0:30,1:0.067:31:10,0:17,0:0|1:14756498_T_C:14756498:5,25,1,0	0|1:28,4:0.096:32:10,2:14,0:0|1:14756498_T_C:14756498:7,21,4,0	RY1114T6	chr1_14756498_T>C	30	1	28	4	3_prime_UTR_variant	MODIFIER	Gm9947	.	snv	T>C	A:T>G:C	1	.
chr1	14756501	.	G	C	.	base_qual;clustered_events;haplotype;normal_artifact;strand_bias;weak_evidence	AS_FilterStatus=weak_evidence,base_qual,strand_bias;AS_SB_TABLE=14,45|4,0;DP=63;ECNT=4;GERMQ=90;MBQ=35,12;MFRL=141,229;MMQ=60,60;MPOS=29;NALOD=-1.622e+00;NLOD=3.63;POPAF=6.00;TLOD=4.09;ANN=C|3_prime_UTR_variant|MODIFIER|Gm9947|ENSMUSG00000054493|transcript|ENSMUST00000067599|protein_coding|1/1|c.*555G>C|||||555|WARNING_TRANSCRIPT_NO_START_CODON,C|upstream_gene_variant|MODIFIER|Msc|ENSMUSG00000025…	GT:AD:AF:DP:F1R2:F2R1:PGT:PID:PS:SB	0|0:29,1:0.069:30:9,0:15,0:0|1:14756498_T_C:14756498:5,24,1,0	0|1:30,3:0.088:33:13,0:11,0:0|1:14756498_T_C:14756498:9,21,3,0	RY1114T6	chr1_14756501_G>C	29	1	30	3	3_prime_UTR_variant	MODIFIER	Gm9947	.	snv	G>C	G:C>C:G	1	.
chr1	14756507	.	G	C	.	base_qual;clustered_events;haplotype;normal_artifact;strand_bias;weak_evidence	AS_FilterStatus=weak_evidence,base_qual,strand_bias;AS_SB_TABLE=17,39|4,0;DP=60;ECNT=4;GERMQ=79;MBQ=33,11;MFRL=141,229;MMQ=60,60;MPOS=23;NALOD=-1.687e+00;NLOD=3.03;POPAF=6.00;TLOD=4.17;ANN=C|3_prime_UTR_variant|MODIFIER|Gm9947|ENSMUSG00000054493|transcript|ENSMUST00000067599|protein_coding|1/1|c.*561G>C|||||561|WARNING_TRANSCRIPT_NO_START_CODON,C|upstream_gene_variant|MODIFIER|Msc|ENSMUSG00000025…	GT:AD:AF:DP:F1R2:F2R1:PGT:PID:PS:SB	0|0:28,1:0.074:29:9,0:15,0:0|1:14756498_T_C:14756498:7,21,1,0	0|1:28,3:0.093:31:12,0:11,0:0|1:14756498_T_C:14756498:10,18,3,0	RY1114T6	chr1_14756507_G>C	28	1	28	3	3_prime_UTR_variant	MODIFIER	Gm9947	.	snv	G>C	G:C>C:G	1	.
chr1	14756509	.	T	C	.	base_qual;clustered_events;haplotype;normal_artifact;strand_bias;weak_evidence	AS_FilterStatus=weak_evidence,base_qual,strand_bias;AS_SB_TABLE=16,36|3,0;DP=58;ECNT=4;GERMQ=79;MBQ=35,12;MFRL=142,230;MMQ=60,60;MPOS=26;NALOD=-1.706e+00;NLOD=2.72;POPAF=6.00;TLOD=4.26;ANN=C|3_prime_UTR_variant|MODIFIER|Gm9947|ENSMUSG00000054493|transcript|ENSMUST00000067599|protein_coding|1/1|c.*563T>C|||||563|WARNING_TRANSCRIPT_NO_START_CODON,C|upstream_gene_variant|MODIFIER|Msc|ENSMUSG00000025…	GT:AD:AF:DP:F1R2:F2R1:PGT:PID:PS:SB	0|0:26,1:0.076:27:10,1:13,0:0|1:14756498_T_C:14756498:6,20,1,0	0|1:26,2:0.100:28:13,0:10,0:0|1:14756498_T_C:14756498:10,16,2,0	RY1114T6	chr1_14756509_T>C	26	1	26	2	3_prime_UTR_variant	MODIFIER	Gm9947	.	snv	T>C	A:T>G:C	1	.
chr1	14881552	.	A	G	.	weak_evidence	AS_FilterStatus=weak_evidence;AS_SB_TABLE=88,19|2,1;DP=116;ECNT=1;GERMQ=93;MBQ=33,20;MFRL=155,148;MMQ=60,60;MPOS=8;NALOD=1.71;NLOD=14.40;POPAF=6.00;TLOD=4.54;ANN=G|intron_variant|MODIFIER|Trpa1|ENSMUSG00000032769|transcript|ENSMUST00000041447|protein_coding|23/26|c.2877+45T>C||||||	GT:AD:AF:DP:F1R2:F2R1:SB	0/0:58,0:0.019:58:12,0:45,0:47,11,0,0	0/1:49,3:0.065:52:14,1:33,2:41,8,2,1	RY1114T6	chr1_14881552_A>G	58	0	49	3	intron_variant	MODIFIER	Trpa1	PASS	snv	A>G	A:T>G:C	1	.
chr1	15269002	.	G	A	.	map_qual;weak_evidence	AS_FilterStatus=weak_evidence,map_qual;AS_SB_TABLE=4,16|1,1;DP=22;ECNT=1;GERMQ=38;MBQ=35,20;MFRL=131,108;MMQ=25,25;MPOS=11;NALOD=1.04;NLOD=3.01;POPAF=6.00;TLOD=3.15;ANN=A|non_coding_transcript_exon_variant|MODIFIER|Gm10566|ENSMUSG00000073737|transcript|ENSMUST00000086739|processed_pseudogene|1/1|n.796C>T||||||	GT:AD:AF:DP:F1R2:F2R1:SB	0/0:11,0:0.083:11:5,0:6,0:1,10,0,0	0/1:9,2:0.222:11:5,2:4,0:3,6,1,1	RY1114T6	chr1_15269002_G>A	11	0	9	2	non_coding_transcript_exon_variant	MODIFIER	Gm10566	.	snv	G>A	G:C>A:T	1	.
chr1	16709579	.	C	T	.	weak_evidence	AS_FilterStatus=weak_evidence;AS_SB_TABLE=3,40|0,2;DP=47;ECNT=1;GERMQ=93;MBQ=37,34;MFRL=158,150;MMQ=60,60;MPOS=3;NALOD=1.41;NLOD=7.21;POPAF=6.00;TLOD=3.35;ANN=T|3_prime_UTR_variant|MODIFIER|Ly96|ENSMUSG00000025779|transcript|ENSMUST00000026881|protein_coding|5/5|c.*42C>T|||||42|	GT:AD:AF:DP:F1R2:F2R1:SB	0/0:27,0:0.037:27:11,0:16,0:3,24,0,0	0/1:16,2:0.151:18:5,0:10,2:0,16,0,2	RY1114T6	chr1_16709579_C>T	27	0	16	2	3_prime_UTR_variant	MODIFIER	Ly96	.	snv	C>T	G:C>A:T	1	.
chr1	17097488	.	A	C	.	PASS	AS_FilterStatus=SITE;AS_SB_TABLE=17,22|2,1;DP=43;ECNT=1;GERMQ=69;MBQ=20,20;MFRL=150,170;MMQ=60,60;MPOS=21;NALOD=1.23;NLOD=4.52;POPAF=6.00;TLOD=5.67;ANN=C|synonymous_variant|LOW|Jph1|ENSMUSG00000042686|transcript|ENSMUST00000038382|protein_coding|1/5|c.117T>G|p.Ser39Ser|402/4809|117/1983|39/660||	GT:AD:AF:DP:F1R2:F2R1:SB	0/0:21,0:0.056:21:12,0:9,0:9,12,0,0	0/1:18,3:0.167:21:7,0:11,3:8,10,2,1	RY1114T6	chr1_17097488_A>C	21	0	18	3	synonymous_variant	LOW	Jph1	PASS	snv	A>C	A:T>C:G	1	PASS
chr1	20955567	.	G	A	.	weak_evidence	AS_FilterStatus=weak_evidence;AS_SB_TABLE=7,18|1,1;DP=27;ECNT=1;GERMQ=42;MBQ=20,20;MFRL=145,146;MMQ=60,60;MPOS=28;NALOD=1.15;NLOD=3.91;POPAF=6.00;TLOD=3.28;ANN=A|intron_variant|MODIFIER|Efhc1|ENSMUSG00000041809|transcript|ENSMUST00000038447|protein_coding|2/10|c.285+11G>A||||||	GT:AD:AF:DP:F1R2:F2R1:SB	0/0:18,0:0.067:18:7,0:11,0:5,13,0,0	0/1:7,2:0.250:9:3,0:4,2:2,5,1,1	RY1114T6	chr1_20955567_G>A	18	0	7	2	intron_variant	MODIFIER	Efhc1	.	snv	G>A	G:C>A:T	1	.
chr1	23762895	.	A	G	.	clustered_events;weak_evidence	AS_FilterStatus=weak_evidence;AS_SB_TABLE=22,16|1,1;DP=41;ECNT=6;GERMQ=65;MBQ=20,20;MFRL=139,130;MMQ=60,60;MPOS=17;NALOD=1.30;NLOD=5.72;POPAF=6.00;TLOD=3.05;ANN=G|synonymous_variant|LOW|B3gat2|ENSMUSG00000026156|transcript|ENSMUST00000063663|protein_coding|1/4|c.261A>G|p.Thr87Thr|970/5655|261/975|87/324||	GT:AD:AF:DP:F1R2:F2R1:SB	0/0:29,0:0.048:29:10,0:19,0:17,12,0,0	0/1:9,2:0.222:11:2,2:7,0:5,4,1,1	RY1114T6	chr1_23762895_A>G	29	0	9	2	synonymous_variant	LOW	B3gat2	.	snv	A>G	A:T>G:C	1	.
chr1	23762907	.	T	C	.	clustered_events;weak_evidence	AS_FilterStatus=weak_evidence;AS_SB_TABLE=24,20|1,1;DP=46;ECNT=6;GERMQ=74;MBQ=20,20;MFRL=135,130;MMQ=60,60;MPOS=29;NALOD=1.37;NLOD=6.62;POPAF=6.00;TLOD=3.08;ANN=C|synonymous_variant|LOW|B3gat2|ENSMUSG00000026156|transcript|ENSMUST00000063663|protein_coding|1/4|c.273T>C|p.Ser91Ser|982/5655|273/975|91/324||	GT:AD:AF:DP:F1R2:F2R1:SB	0/0:35,0:0.041:35:15,0:20,0:20,15,0,0	0/1:9,2:0.202:11:2,2:6,0:4,5,1,1	RY1114T6	chr1_23762907_T>C	35	0	9	2	synonymous_variant	LOW	B3gat2	.	snv	T>C	A:T>G:C	1	.
chr1	23762925	.	C	G	.	clustered_events;haplotype	AS_FilterStatus=SITE;AS_SB_TABLE=20,22|1,1;DP=45;ECNT=6;GERMQ=75;MBQ=20,20;MFRL=137,130;MMQ=60,60;MPOS=34;NALOD=1.38;NLOD=6.92;POPAF=6.00;TLOD=7.23;ANN=G|synonymous_variant|LOW|B3gat2|ENSMUSG00000026156|transcript|ENSMUST00000063663|protein_coding|1/4|c.291C>G|p.Ala97Ala|1000/5655|291/975|97/324||	GT:AD:AF:DP:F1R2:F2R1:PGT:PID:PS:SB	0|0:34,0:0.040:34:14,0:19,0:0|1:23762925_C_G:23762925:16,18,0,0	0|1:8,2:0.219:10:2,2:6,0:0|1:23762925_C_G:23762925:4,4,1,1	RY1114T6	chr1_23762925_C>G	34	0	8	2	synonymous_variant	LOW	B3gat2	.	snv	C>G	G:C>C:G	1	.
chr1	23762931	.	C	G	.	clustered_events;haplotype	AS_FilterStatus=SITE;AS_SB_TABLE=20,22|1,1;DP=44;ECNT=6;GERMQ=75;MBQ=20,20;MFRL=137,130;MMQ=60,60;MPOS=34;NALOD=1.38;NLOD=6.92;POPAF=6.00;TLOD=7.25;ANN=G|synonymous_variant|LOW|B3gat2|ENSMUSG00000026156|transcript|ENSMUST00000063663|protein_coding|1/4|c.297C>G|p.Leu99Leu|1006/5655|297/975|99/324||	GT:AD:AF:DP:F1R2:F2R1:PGT:PID:PS:SB	0|0:34,0:0.040:34:15,0:19,0:0|1:23762925_C_G:23762925:16,18,0,0	0|1:8,2:0.222:10:2,2:6,0:0|1:23762925_C_G:23762925:4,4,1,1	RY1114T6	chr1_23762931_C>G	34	0	8	2	synonymous_variant	LOW	B3gat2	.	snv	C>G	G:C>C:G	2	.
chr1	23762934	.	T	C	.	clustered_events;haplotype	AS_FilterStatus=SITE;AS_SB_TABLE=20,22|1,1;DP=44;ECNT=6;GERMQ=75;MBQ=20,20;MFRL=137,130;MMQ=60,60;MPOS=34;NALOD=1.38;NLOD=6.92;POPAF=6.00;TLOD=7.25;ANN=C|synonymous_variant|LOW|B3gat2|ENSMUSG00000026156|transcript|ENSMUST00000063663|protein_coding|1/4|c.300T>C|p.Thr100Thr|1009/5655|300/975|100/324||	GT:AD:AF:DP:F1R2:F2R1:PGT:PID:PS:SB	0|0:34,0:0.040:34:15,0:19,0:0|1:23762925_C_G:23762925:16,18,0,0	0|1:8,2:0.222:10:2,2:6,0:0|1:23762925_C_G:23762925:4,4,1,1	RY1114T6	chr1_23762934_T>C	34	0	8	2	synonymous_variant	LOW	B3gat2	.	snv	T>C	A:T>G:C	2	.
chr1	23762949	.	C	G	.	clustered_events;weak_evidence	AS_FilterStatus=weak_evidence;AS_SB_TABLE=19,20|1,1;DP=44;ECNT=6;GERMQ=63;MBQ=20,20;MFRL=139,130;MMQ=60,60;MPOS=29;NALOD=1.33;NLOD=6.02;POPAF=6.00;TLOD=3.27;ANN=G|synonymous_variant|LOW|B3gat2|ENSMUSG00000026156|transcript|ENSMUST00000063663|protein_coding|1/4|c.315C>G|p.Thr105Thr|1024/5655|315/975|105/324||	GT:AD:AF:DP:F1R2:F2R1:SB	0/0:32,0:0.045:32:14,0:18,0:16,16,0,0	0/1:7,2:0.246:9:1,2:6,0:3,4,1,1	RY1114T6	chr1_23762949_C>G	32	0	7	2	synonymous_variant	LOW	B3gat2	.	snv	C>G	G:C>C:G	1	.
chr1	25112100	.	A	AT	.	clustered_events;haplotype;weak_evidence	AS_FilterStatus=weak_evidence;AS_SB_TABLE=54,5|2,0;DP=62;ECNT=7;GERMQ=93;MBQ=35,38;MFRL=157,137;MMQ=60,60;MPOS=3;NALOD=1.45;NLOD=7.88;POPAF=6.00;RPA=6,7;RU=T;STR;STRQ=93;TLOD=4.84;ANN=AT|intron_variant|MODIFIER|Bai3|ENSMUSG00000033569|transcript|ENSMUST00000041838|protein_coding|23/29|c.3287+76dupA||||||	GT:AD:AF:DP:F1R2:F2R1:PGT:PID:PS:SB	0|0:28,0:0.034:28:7,0:19,0:0|1:25112100_A_AT:25112100:26,2,0,0	0|1:31,2:0.093:33:5,2:24,0:0|1:25112100_A_AT:25112100:28,3,2,0	RY1114T6	chr1_25112100_A>AT	28	0	31	2	intron_variant	MODIFIER	Bai3	.	indel	.	.	1	.
chr1	25112107	.	C	T	.	clustered_events;haplotype	AS_FilterStatus=SITE;AS_SB_TABLE=61,8|2,0;DP=78;ECNT=7;GERMQ=93;MBQ=36,36;MFRL=156,137;MMQ=60,60;MPOS=11;NALOD=1.26;NLOD=9.64;POPAF=6.00;TLOD=5.08;ANN=T|intron_variant|MODIFIER|Bai3|ENSMUSG00000033569|transcript|ENSMUST00000041838|protein_coding|23/29|c.3287+70G>A||||||	GT:AD:AF:DP:F1R2:F2R1:PGT:PID:PS:SB	0|0:36,0:0.028:36:9,0:25,0:0|1:25112100_A_AT:25112100:32,4,0,0	0|1:33,2:0.090:35:7,2:26,0:0|1:25112100_A_AT:25112100:29,4,2,0	RY1114T6	chr1_25112107_C>T	36	0	33	2	intron_variant	MODIFIER	Bai3	.	snv	C>T	G:C>A:T	1	.
chr1	25112133	.	G	T	.	clustered_events;haplotype	AS_FilterStatus=SITE;AS_SB_TABLE=110,36|2,1;DP=149;ECNT=7;GERMQ=93;MBQ=30,20;MFRL=153,120;MMQ=60,60;MPOS=36;NALOD=1.79;NLOD=18.02;POPAF=6.00;TLOD=7.27;ANN=T|intron_variant|MODIFIER|Bai3|ENSMUSG00000033569|transcript|ENSMUST00000041838|protein_coding|23/29|c.3287+44C>A||||||	GT:AD:AF:DP:F1R2:F2R1:PGT:PID:PS:SB	0|0:75,0:0.016:75:20,0:50,0:0|1:25112133_G_T:25112133:58,17,0,0	0|1:71,3:0.051:74:17,3:49,0:0|1:25112133_G_T:25112133:52,19,2,1	RY1114T6	chr1_25112133_G>T	75	0	71	3	intron_variant	MODIFIER	Bai3	PASS	snv	G>T	G:C>T:A	1	.
chr1	25112135	.	T	TA	.	clustered_events;haplotype;weak_evidence	AS_FilterStatus=weak_evidence;AS_SB_TABLE=110,36|2,1;DP=158;ECNT=7;GERMQ=93;MBQ=33,20;MFRL=153,120;MMQ=60,60;MPOS=38;NALOD=1.81;NLOD=18.03;POPAF=6.00;RPA=3,4;RU=A;STR;STRQ=93;TLOD=7.26;ANN=TA|intron_variant|MODIFIER|Bai3|ENSMUSG00000033569|transcript|ENSMUST00000041838|protein_coding|23/29|c.3287+41dupT||||||	GT:AD:AF:DP:F1R2:F2R1:PGT:PID:PS:SB	0|0:75,0:0.016:75:21,0:53,0:0|1:25112133_G_T:25112133:58,17,0,0	0|1:71,3:0.050:74:18,3:52,0:0|1:25112133_G_T:25112133:52,19,2,1	RY1114T6	chr1_25112135_T>TA	75	0	71	3	intron_variant	MODIFIER	Bai3	PASS	indel	.	.	1	.
chr1	25112164	.	TT	GA	.	clustered_events;haplotype	AS_FilterStatus=SITE;AS_SB_TABLE=144,81|3,2;DP=233;ECNT=7;GERMQ=93;MBQ=20,20;MFRL=149,143;MMQ=60,60;MPOS=31;NALOD=1.92;NLOD=24.98;POPAF=6.00;TLOD=15.63;ANN=GA|intron_variant|MODIFIER|Bai3|ENSMUSG00000033569|transcript|ENSMUST00000041838|protein_coding|23/29|c.3287+12_3287+13delAAinsTC||||||	GT:AD:AF:DP:F1R2:F2R1:PGT:PID:PS:SB	0|0:118,0:0.012:118:31,0:84,0:0|1:25112164_TT_GA:25112164:77,41,0,0	0|1:107,5:0.048:112:32,5:70,0:0|1:25112164_TT_GA:25112164:67,40,3,2	RY1114T6	chr1_25112164_TT>GA	118	0	107	5	intron_variant	MODIFIER	Bai3	PASS	indel	.	.	1	.
chr1	25112169	.	A	G	.	clustered_events;haplotype	AS_FilterStatus=SITE;AS_SB_TABLE=145,86|3,2;DP=245;ECNT=7;GERMQ=93;MBQ=20,20;MFRL=148,143;MMQ=60,60;MPOS=26;NALOD=1.93;NLOD=24.98;POPAF=6.00;TLOD=15.58;ANN=G|splice_region_variant&intron_variant|LOW|Bai3|ENSMUSG00000033569|transcript|ENSMUST00000041838|protein_coding|23/29|c.3287+8T>C||||||	GT:AD:AF:DP:F1R2:F2R1:PGT:PID:PS:SB	0|0:121,0:0.012:121:29,0:88,0:0|1:25112164_TT_GA:25112164:77,44,0,0	0|1:110,5:0.047:115:39,5:68,0:0|1:25112164_TT_GA:25112164:68,42,3,2	RY1114T6	chr1_25112169_A>G	121	0	110	5	splice_region_variant&intron_variant	LOW	Bai3	PASS	snv	A>G	A:T>G:C	1	.
chr1	25112215	.	A	T	.	clustered_events	AS_FilterStatus=SITE;AS_SB_TABLE=110,139|1,3;DP=263;ECNT=7;GERMQ=93;MBQ=20,28;MFRL=147,143;MMQ=60,60;MPOS=28;NALOD=1.95;NLOD=26.19;POPAF=6.00;TLOD=6.17;ANN=T|synonymous_variant|LOW|Bai3|ENSMUSG00000033569|transcript|ENSMUST00000041838|protein_coding|23/30|c.3249T>A|p.Ser1083Ser|3249/5059|3249/4569|1083/1522||	GT:AD:AF:DP:F1R2:F2R1:SB	0/0:129,0:0.011:129:38,0:91,0:55,74,0,0	0/1:120,4:0.045:124:47,4:73,0:55,65,1,3	RY1114T6	chr1_25112215_A>T	129	0	120	4	synonymous_variant	LOW	Bai3	PASS	snv	A>T	A:T>T:A	1	.
chr1	25228463	.	C	A	.	weak_evidence	AS_FilterStatus=weak_evidence;AS_SB_TABLE=82,87|1,2;DP=187;ECNT=1;GERMQ=93;MBQ=34,20;MFRL=146,138;MMQ=60,60;MPOS=36;NALOD=1.92;NLOD=23.78;POPAF=6.00;TLOD=3.96;ANN=A|synonymous_variant|LOW|Bai3|ENSMUSG00000033569|transcript|ENSMUST00000041838|protein_coding|16/30|c.2565G>T|p.Arg855Arg|2565/5059|2565/4569|855/1522||,A|downstream_gene_variant|MODIFIER|Gm15702|ENSMUSG00000080849|transcript|ENSMUST000…	GT:AD:AF:DP:F1R2:F2R1:SB	0/0:105,0:0.012:105:48,0:56,0:49,56,0,0	0/1:64,3:0.052:67:24,0:38,3:33,31,1,2	RY1114T6	chr1_25228463_C>A	105	0	64	3	synonymous_variant	LOW	Bai3	PASS	snv	C>A	G:C>T:A	1	.
chr1	26687727	.	G	A	.	weak_evidence	AS_FilterStatus=weak_evidence;AS_SB_TABLE=6,6|1,1;DP=14;ECNT=1;GERMQ=14;MBQ=28,20;MFRL=143,130;MMQ=60,60;MPOS=18;NALOD=0.954;NLOD=2.41;POPAF=6.00;TLOD=4.14;ANN=A|upstream_gene_variant|MODIFIER|4931408C20Rik|ENSMUSG00000073722|transcript|ENSMUST00000097801|protein_coding||c.-301C>T|||||267|,A|intergenic_region|MODIFIER|4931408C20Rik-n-R5s209|ENSMUSG00000073722-ENSMUSG00000095256|intergenic_region|…	GT:AD:AF:DP:F1R2:F2R1:SB	0/0:11,0:0.100:11:8,0:3,0:5,6,0,0	0/1:1,2:0.500:3:1,0:0,2:1,0,1,1	RY1114T6	chr1_26687727_G>A	11	0	1	2	upstream_gene_variant	MODIFIER	4931408C20Rik	.	snv	G>A	G:C>A:T	1	.
chr1	30977308	.	G	A	.	weak_evidence	AS_FilterStatus=weak_evidence;AS_SB_TABLE=9,14|1,1;DP=27;ECNT=1;GERMQ=38;MBQ=20,20;MFRL=150,115;MMQ=60,60;MPOS=40;NALOD=1.04;NLOD=3.01;POPAF=6.00;TLOD=3.07;ANN=A|stop_gained|HIGH|Gm5698|ENSMUSG00000086151|transcript|ENSMUST00000156220|protein_coding|2/2|c.661C>T|p.Gln221*|783/1141|661/726|221/241||	GT:AD:AF:DP:F1R2:F2R1:SB	0/0:14,0:0.083:14:11,0:3,0:7,7,0,0	0/1:9,2:0.197:11:6,2:3,0:2,7,1,1	RY1114T6	chr1_30977308_G>A	14	0	9	2	stop_gained	HIGH	Gm5698	.	snv	G>A	G:C>A:T	1	.
chr1	34295353	.	TCA	T	.	normal_artifact;slippage;strand_bias;weak_evidence	AS_FilterStatus=weak_evidence,strand_bias;AS_SB_TABLE=25,25|3,0;DP=70;ECNT=1;GERMQ=50;MBQ=35,38;MFRL=167,238;MMQ=60,60;MPOS=39;NALOD=-5.167e-01;NLOD=5.99;POPAF=6.00;RPA=10,9;RU=CA;STR;STRQ=1;TLOD=3.10;ANN=T|intron_variant|MODIFIER|Dst|ENSMUSG00000026131|transcript|ENSMUST00000183034|protein_coding|95/102|c.22170+65_22170+66delAC||||||INFO_REALIGN_3_PRIME	GT:AD:AF:DP:F1R2:F2R1:SB	0/0:35,1:0.057:36:13,1:19,0:18,17,1,0	0/1:15,2:0.173:17:8,2:6,0:7,8,2,0	RY1114T6	chr1_34295353_TCA>T	35	1	15	2	intron_variant	MODIFIER	Dst	.	indel	.	.	2	.
chr1	36549863	.	A	T	.	clustered_events;haplotype	AS_FilterStatus=SITE;AS_SB_TABLE=29,27|1,1;DP=60;ECNT=5;GERMQ=93;MBQ=20,39;MFRL=148,124;MMQ=60,60;MPOS=27;NALOD=1.27;NLOD=5.12;POPAF=6.00;TLOD=6.21;ANN=T|synonymous_variant|LOW|Sema4c|ENSMUSG00000026121|transcript|ENSMUST00000027295|protein_coding|15/15|c.2181T>A|p.Thr727Thr|2419/3640|2181/2505|727/834||,T|upstream_gene_variant|MODIFIER|Ankrd39|ENSMUSG00000079610|transcript|ENSMUST00000001172|pro…	GT:AD:AF:DP:F1R2:F2R1:PGT:PID:PS:SB	0|0:25,0:0.052:25:11,0:13,0:0|1:36549863_A_T:36549863:12,13,0,0	0|1:31,2:0.076:33:12,0:18,2:0|1:36549863_A_T:36549863:17,14,1,1	RY1114T6	chr1_36549863_A>T	25	0	31	2	synonymous_variant	LOW	Sema4c	.	snv	A>T	A:T>T:A	1	.
chr1	36549865	.	T	G	.	clustered_events;haplotype	AS_FilterStatus=SITE;AS_SB_TABLE=30,27|1,1;DP=59;ECNT=5;GERMQ=93;MBQ=20,38;MFRL=146,124;MMQ=60,60;MPOS=27;NALOD=1.28;NLOD=5.42;POPAF=6.00;TLOD=6.22;ANN=G|missense_variant|MODERATE|Sema4c|ENSMUSG00000026121|transcript|ENSMUST00000027295|protein_coding|15/15|c.2179A>C|p.Thr727Pro|2417/3640|2179/2505|727/834||,G|upstream_gene_variant|MODIFIER|Ankrd39|ENSMUSG00000079610|transcript|ENSMUST00000001172|…	GT:AD:AF:DP:F1R2:F2R1:PGT:PID:PS:SB	0|0:26,0:0.050:26:11,0:12,0:0|1:36549863_A_T:36549863:13,13,0,0	0|1:31,2:0.077:33:13,0:18,2:0|1:36549863_A_T:36549863:17,14,1,1	RY1114T6	chr1_36549865_T>G	26	0	31	2	missense_variant	MODERATE	Sema4c	.	snv	T>G	A:T>C:G	1	.
chr1	36549869	.	G	A	.	clustered_events;haplotype	AS_FilterStatus=SITE;AS_SB_TABLE=32,29|1,1;DP=63;ECNT=5;GERMQ=93;MBQ=20,38;MFRL=146,124;MMQ=60,60;MPOS=27;NALOD=1.26;NLOD=5.12;POPAF=6.00;TLOD=6.15;ANN=A|synonymous_variant|LOW|Sema4c|ENSMUSG00000026121|transcript|ENSMUST00000027295|protein_coding|15/15|c.2175C>T|p.Pro725Pro|2413/3640|2175/2505|725/834||,A|upstream_gene_variant|MODIFIER|Ankrd39|ENSMUSG00000079610|transcript|ENSMUST00000001172|pro…	GT:AD:AF:DP:F1R2:F2R1:PGT:PID:PS:SB	0|0:25,0:0.053:25:9,0:13,0:0|1:36549863_A_T:36549863:13,12,0,0	0|1:36,2:0.071:38:13,0:20,2:0|1:36549863_A_T:36549863:19,17,1,1	RY1114T6	chr1_36549869_G>A	25	0	36	2	synonymous_variant	LOW	Sema4c	.	snv	G>A	G:C>A:T	1	.
chr1	36549872	.	G	A	.	clustered_events;haplotype	AS_FilterStatus=SITE;AS_SB_TABLE=29,29|1,1;DP=60;ECNT=5;GERMQ=93;MBQ=20,37;MFRL=145,124;MMQ=60,60;MPOS=27;NALOD=1.26;NLOD=5.12;POPAF=6.00;TLOD=6.19;ANN=A|synonymous_variant|LOW|Sema4c|ENSMUSG00000026121|transcript|ENSMUST00000027295|protein_coding|15/15|c.2172C>T|p.Gly724Gly|2410/3640|2172/2505|724/834||,A|upstream_gene_variant|MODIFIER|Ankrd39|ENSMUSG00000079610|transcript|ENSMUST00000001172|pro…	GT:AD:AF:DP:F1R2:F2R1:PGT:PID:PS:SB	0|0:24,0:0.053:24:10,0:14,0:0|1:36549863_A_T:36549863:11,13,0,0	0|1:34,2:0.074:36:13,0:21,2:0|1:36549863_A_T:36549863:18,16,1,1	RY1114T6	chr1_36549872_G>A	24	0	34	2	synonymous_variant	LOW	Sema4c	.	snv	G>A	G:C>A:T	1	.
chr1	36549874	.	CA	AG	.	clustered_events;haplotype	AS_FilterStatus=SITE;AS_SB_TABLE=29,30|1,1;DP=61;ECNT=5;GERMQ=93;MBQ=20,39;MFRL=145,124;MMQ=60,60;MPOS=27;NALOD=1.26;NLOD=5.12;POPAF=6.00;TLOD=6.15;ANN=AG|missense_variant|MODERATE|Sema4c|ENSMUSG00000026121|transcript|ENSMUST00000027295|protein_coding|15/15|c.2169_2170delTGinsCT|p.Gly724Cys|2408/3640|2169/2505|723/834||,AG|upstream_gene_variant|MODIFIER|Ankrd39|ENSMUSG00000079610|transcript|ENSMU…	GT:AD:AF:DP:F1R2:F2R1:PGT:PID:PS:SB	0|0:24,0:0.053:24:10,0:13,0:0|1:36549863_A_T:36549863:11,13,0,0	0|1:35,2:0.071:37:13,0:20,2:0|1:36549863_A_T:36549863:18,17,1,1	RY1114T6	chr1_36549874_CA>AG	24	0	35	2	missense_variant	MODERATE	Sema4c	.	indel	.	.	1	.
chr1	36771827	.	A	G	.	clustered_events	AS_FilterStatus=SITE;AS_SB_TABLE=30,29|2,1;DP=67;ECNT=4;GERMQ=93;MBQ=34,20;MFRL=157,104;MMQ=60,60;MPOS=40;NALOD=1.52;NLOD=9.54;POPAF=6.00;TLOD=5.98;ANN=G|synonymous_variant|LOW|Zap70|ENSMUSG00000026117|transcript|ENSMUST00000027291|protein_coding|3/13|c.441A>G|p.Pro147Pro|532/2180|441/1857|147/618||	GT:AD:AF:DP:F1R2:F2R1:SB	0/0:41,0:0.030:41:14,0:25,0:18,23,0,0	0/1:18,3:0.148:21:7,3:11,0:12,6,2,1	RY1114T6	chr1_36771827_A>G	41	0	18	3	synonymous_variant	LOW	Zap70	PASS	snv	A>G	A:T>G:C	1	.
chr1	36771851	.	C	G	.	clustered_events;haplotype	AS_FilterStatus=SITE;AS_SB_TABLE=25,38|2,1;DP=66;ECNT=4;GERMQ=93;MBQ=35,20;MFRL=157,104;MMQ=60,60;MPOS=18;NALOD=1.51;NLOD=9.33;POPAF=6.00;TLOD=9.89;ANN=G|synonymous_variant|LOW|Zap70|ENSMUSG00000026117|transcript|ENSMUST00000027291|protein_coding|3/13|c.465C>G|p.Thr155Thr|556/2180|465/1857|155/618||	GT:AD:AF:DP:F1R2:F2R1:PGT:PID:PS:SB	0|0:41,0:0.030:41:17,0:23,0:0|1:36771851_C_G:36771851:13,28,0,0	0|1:22,3:0.136:25:8,3:14,0:0|1:36771851_C_G:36771851:12,10,2,1	RY1114T6	chr1_36771851_C>G	41	0	22	3	synonymous_variant	LOW	Zap70	PASS	snv	C>G	G:C>C:G	1	.
chr1	36771854	.	A	G	.	clustered_events;haplotype	AS_FilterStatus=SITE;AS_SB_TABLE=27,38|2,1;DP=68;ECNT=4;GERMQ=93;MBQ=36,20;MFRL=157,104;MMQ=60,60;MPOS=15;NALOD=1.52;NLOD=9.63;POPAF=6.00;TLOD=9.83;ANN=G|synonymous_variant|LOW|Zap70|ENSMUSG00000026117|transcript|ENSMUST00000027291|protein_coding|3/13|c.468A>G|p.Thr156Thr|559/2180|468/1857|156/618||	GT:AD:AF:DP:F1R2:F2R1:PGT:PID:PS:SB	0|0:42,0:0.029:42:18,0:23,0:0|1:36771851_C_G:36771851:14,28,0,0	0|1:23,3:0.130:26:7,3:15,0:0|1:36771851_C_G:36771851:13,10,2,1	RY1114T6	chr1_36771854_A>G	42	0	23	3	synonymous_variant	LOW	Zap70	PASS	snv	A>G	A:T>G:C	1	.
chr1	36771866	.	A	G	.	clustered_events;weak_evidence	AS_FilterStatus=weak_evidence;AS_SB_TABLE=22,33|1,1;DP=67;ECNT=4;GERMQ=93;MBQ=34,20;MFRL=155,104;MMQ=60,60;MPOS=21;NALOD=1.47;NLOD=8.13;POPAF=6.00;TLOD=4.32;ANN=G|synonymous_variant|LOW|Zap70|ENSMUSG00000026117|transcript|ENSMUST00000027291|protein_coding|3/13|c.480A>G|p.Arg160Arg|571/2180|480/1857|160/618||	GT:AD:AF:DP:F1R2:F2R1:SB	0/0:33,0:0.033:33:15,0:18,0:10,23,0,0	0/1:22,2:0.092:24:6,2:16,0:12,10,1,1	RY1114T6	chr1_36771866_A>G	33	0	22	2	synonymous_variant	LOW	Zap70	.	snv	A>G	A:T>G:C	1	.
chr1	37398898	.	C	T	.	PASS	AS_FilterStatus=SITE;AS_SB_TABLE=18,25|1,2;DP=46;ECNT=1;GERMQ=76;MBQ=35,20;MFRL=145,171;MMQ=60,60;MPOS=4;NALOD=1.30;NLOD=5.72;POPAF=6.00;TLOD=5.50;ANN=T|stop_gained|HIGH|Inpp4a|ENSMUSG00000026113|transcript|ENSMUST00000137266|protein_coding|23/24|c.2779C>T|p.Gln927*|2779/2934|2779/2934|927/977||	GT:AD:AF:DP:F1R2:F2R1:SB	0/0:27,0:0.048:27:16,0:11,0:13,14,0,0	0/1:16,3:0.167:19:4,0:12,3:5,11,1,2	RY1114T6	chr1_37398898_C>T	27	0	16	3	stop_gained	HIGH	Inpp4a	PASS	snv	C>T	G:C>A:T	1	PASS
chr1	38209787	.	C	T	.	PASS	AS_FilterStatus=SITE;AS_SB_TABLE=9,20|1,1;DP=31;ECNT=1;GERMQ=55;MBQ=20,20;MFRL=157,145;MMQ=60,60;MPOS=28;NALOD=0.954;NLOD=2.41;POPAF=6.00;TLOD=6.68;ANN=T|synonymous_variant|LOW|Aff3|ENSMUSG00000037138|transcript|ENSMUST00000095027|protein_coding|12/22|c.2238G>A|p.Thr746Thr|2282/5857|2238/3690|746/1229||	GT:AD:AF:DP:F1R2:F2R1:SB	0/0:11,0:0.100:11:5,0:5,0:4,7,0,0	0/1:18,2:0.125:20:8,2:9,0:5,13,1,1	RY1114T6	chr1_38209787_C>T	11	0	18	2	synonymous_variant	LOW	Aff3	.	snv	C>T	G:C>A:T	1	.
chr1	40756157	.	CTG	C	.	slippage;weak_evidence	AS_FilterStatus=weak_evidence;AS_SB_TABLE=88,11|3,0;DP=107;ECNT=1;GERMQ=93;MBQ=35,36;MFRL=166,197;MMQ=60,60;MPOS=41;NALOD=1.63;NLOD=12.26;POPAF=6.00;RPA=6,5;RU=TG;STR;STRQ=1;TLOD=5.67;ANN=C|intron_variant|MODIFIER|Slc9a2|ENSMUSG00000026062|transcript|ENSMUST00000027231|protein_coding|6/11|c.1519-90_1519-89delGT||||||INFO_REALIGN_3_PRIME	GT:AD:AF:DP:F1R2:F2R1:SB	0/0:45,0:0.023:45:8,0:35,0:41,4,0,0	0/1:54,3:0.075:57:17,0:35,3:47,7,3,0	RY1114T6	chr1_40756157_CTG>C	45	0	54	3	intron_variant	MODIFIER	Slc9a2	PASS	indel	.	.	1	.
chr1	45520462	.	G	T	.	weak_evidence	AS_FilterStatus=weak_evidence;AS_SB_TABLE=14,16|1,1;DP=34;ECNT=1;GERMQ=52;MBQ=20,20;MFRL=136,147;MMQ=60,60;MPOS=27;NALOD=1.20;NLOD=4.21;POPAF=6.00;TLOD=3.02;ANN=T|intergenic_region|MODIFIER|Col5a2-Gm23216|ENSMUSG00000026042-ENSMUSG00000095121|intergenic_region|ENSMUSG00000026042-ENSMUSG00000095121|||n.45520462G>T||||||	GT:AD:AF:DP:F1R2:F2R1:SB	0/0:20,0:0.060:20:6,0:14,0:8,12,0,0	0/1:10,2:0.200:12:9,2:1,0:6,4,1,1	RY1114T6	chr1_45520462_G>T	20	0	10	2	intergenic_region	MODIFIER	Col5a2-Gm23216	.	snv	G>T	G:C>T:A	1	.
chr1	46730808	.	C	T	.	base_qual;haplotype;normal_artifact;strand_bias;weak_evidence	AS_FilterStatus=weak_evidence,base_qual,strand_bias;AS_SB_TABLE=122,49|3,0;DP=174;ECNT=2;GERMQ=93;MBQ=25,8;MFRL=147,227;MMQ=60,60;MPOS=38;NALOD=-7.681e-01;NLOD=17.47;POPAF=6.00;TLOD=3.12;ANN=T|intergenic_region|MODIFIER|Dnah7c-Slc39a10|ENSMUSG00000095861-ENSMUSG00000025986|intergenic_region|ENSMUSG00000095861-ENSMUSG00000025986|||n.46730808C>T||||||	GT:AD:AF:DP:F1R2:F2R1:PGT:PID:PS:SB	0|0:96,1:0.027:97:30,0:51,0:0|1:46730808_C_T:46730808:70,26,1,0	0|1:75,2:0.048:77:21,0:47,1:0|1:46730808_C_T:46730808:52,23,2,0	RY1114T6	chr1_46730808_C>T	96	1	75	2	intergenic_region	MODIFIER	Dnah7c-Slc39a10	.	snv	C>T	G:C>A:T	1	.
chr1	46730809	.	TGCC	T	.	base_qual;haplotype;normal_artifact;strand_bias;weak_evidence	AS_FilterStatus=weak_evidence,base_qual,strand_bias;AS_SB_TABLE=126,51|3,0;DP=189;ECNT=2;GERMQ=93;MBQ=35,9;MFRL=147,227;MMQ=60,60;MPOS=37;NALOD=-7.505e-01;NLOD=17.76;POPAF=6.00;TLOD=3.05;ANN=T|intergenic_region|MODIFIER|Dnah7c-Slc39a10|ENSMUSG00000095861-ENSMUSG00000025986|intergenic_region|ENSMUSG00000095861-ENSMUSG00000025986|||n.46730810_46730812delGCC||||||	GT:AD:AF:DP:F1R2:F2R1:PGT:PID:PS:SB	0|0:97,1:0.026:98:31,0:57,0:0|1:46730808_C_T:46730808:71,26,1,0	0|1:80,2:0.046:82:22,0:51,0:0|1:46730808_C_T:46730808:55,25,2,0	RY1114T6	chr1_46730809_TGCC>T	97	1	80	2	intergenic_region	MODIFIER	Dnah7c-Slc39a10	.	indel	.	.	1	.
chr1	53267790	.	TAC	T	.	normal_artifact;slippage;weak_evidence	AS_FilterStatus=weak_evidence;AS_SB_TABLE=64,19|4,3;DP=99;ECNT=1;GERMQ=87;MBQ=33,20;MFRL=152,146;MMQ=60,60;MPOS=28;NALOD=-1.938e+00;NLOD=4.51;POPAF=6.00;RPA=11,10;RU=AC;STR;STRQ=1;TLOD=3.41;ANN=T|intron_variant|MODIFIER|Pms1|ENSMUSG00000026098|transcript|ENSMUST00000027267|protein_coding|4/12|c.418+36_418+37delGT||||||	GT:AD:AF:DP:F1R2:F2R1:SB	0/0:39,2:0.080:41:12,0:25,2:30,9,2,0	0/1:44,5:0.095:49:3,0:38,5:34,10,2,3	RY1114T6	chr1_53267790_TAC>T	39	2	44	5	intron_variant	MODIFIER	Pms1	.	indel	.	.	3	.
chr1	53547217	.	G	T	.	PASS	AS_FilterStatus=SITE;AS_SB_TABLE=136,107|3,3;DP=257;ECNT=1;GERMQ=93;MBQ=20,20;MFRL=150,150;MMQ=55,49;MPOS=14;NALOD=2.04;NLOD=32.21;POPAF=6.00;TLOD=9.50;ANN=T|missense_variant|MODERATE|Dnah7a|ENSMUSG00000096141|transcript|ENSMUST00000094964|protein_coding|29/66|c.4474C>A|p.Leu1492Met|4566/12272|4474/12075|1492/4024||	GT:AD:AF:DP:F1R2:F2R1:SB	0/0:141,0:9.106e-03:141:64,0:77,0:80,61,0,0	0/1:102,6:0.062:108:59,4:43,2:56,46,3,3	RY1114T6	chr1_53547217_G>T	141	0	102	6	missense_variant	MODERATE	Dnah7a	PASS	snv	G>T	G:C>T:A	1	PASS
chr1	54480796	.	G	A	.	weak_evidence	AS_FilterStatus=weak_evidence;AS_SB_TABLE=57,61|1,2;DP=125;ECNT=1;GERMQ=93;MBQ=20,20;MFRL=142,171;MMQ=60,60;MPOS=13;NALOD=1.67;NLOD=13.50;POPAF=6.00;TLOD=4.55;ANN=A|synonymous_variant|LOW|Pgap1|ENSMUSG00000073678|transcript|ENSMUST00000097739|protein_coding|27/27|c.2679C>T|p.Gly893Gly|2783/10579|2679/2769|893/922||	GT:AD:AF:DP:F1R2:F2R1:SB	0/0:61,0:0.021:61:20,0:40,0:28,33,0,0	0/1:57,3:0.068:60:21,1:36,2:29,28,1,2	RY1114T6	chr1_54480796_G>A	61	0	57	3	synonymous_variant	LOW	Pgap1	PASS	snv	G>A	G:C>A:T	1	.
chr1	57900679	.	C	A	.	weak_evidence	AS_FilterStatus=weak_evidence;AS_SB_TABLE=44,44|2,1;DP=92;ECNT=1;GERMQ=93;MBQ=20,20;MFRL=147,173;MMQ=60,60;MPOS=26;NALOD=1.51;NLOD=9.33;POPAF=6.00;TLOD=4.13;ANN=A|missense_variant|MODERATE|Spats2l|ENSMUSG00000038305|transcript|ENSMUST00000167085|protein_coding|8/14|c.551C>A|p.Pro184His|812/3929|551/1737|184/578||	GT:AD:AF:DP:F1R2:F2R1:SB	0/0:43,0:0.030:43:14,0:29,0:22,21,0,0	0/1:45,3:0.083:48:13,0:31,3:22,23,2,1	RY1114T6	chr1_57900679_C>A	43	0	45	3	missense_variant	MODERATE	Spats2l	PASS	snv	C>A	G:C>T:A	1	.
chr1	58262697	.	GCA	G	.	germline;slippage;weak_evidence	AS_FilterStatus=weak_evidence;AS_SB_TABLE=1,11|2,1;DP=22;ECNT=1;GERMQ=1;MBQ=36,20;MFRL=186,148;MMQ=60,60;MPOS=25;NALOD=1.03;NLOD=2.69;POPAF=6.00;RPA=7,6;RU=CA;STR;STRQ=1;TLOD=5.85;ANN=G|intron_variant|MODIFIER|Aox4|ENSMUSG00000038242|transcript|ENSMUST00000040442|protein_coding|29/34|c.3369+71_3369+72delCA||||||INFO_REALIGN_3_PRIME,G|intron_variant|MODIFIER|Gm15759|ENSMUSG00000089822|transcript|E…	GT:AD:AF:DP:F1R2:F2R1:SB	0/0:9,0:0.086:9:7,0:2,0:1,8,0,0	0/1:3,3:0.428:6:2,1:1,2:0,3,2,1	RY1114T6	chr1_58262697_GCA>G	9	0	3	3	intron_variant	MODIFIER	Aox4	.	indel	.	.	1	.
chr1	58613984	.	C	T	.	PASS	AS_FilterStatus=SITE;AS_SB_TABLE=17,9|2,1;DP=29;ECNT=1;GERMQ=43;MBQ=20,20;MFRL=79,97;MMQ=50,60;MPOS=44;NALOD=1.000;NLOD=2.71;POPAF=6.00;TLOD=5.78;ANN=T|intergenic_region|MODIFIER|Ndufb3-Gm10068|ENSMUSG00000026032-ENSMUSG00000059647|intergenic_region|ENSMUSG00000026032-ENSMUSG00000059647|||n.58613984C>T||||||	GT:AD:AF:DP:F1R2:F2R1:SB	0/0:11,0:0.091:11:5,0:6,0:5,6,0,0	0/1:15,3:0.177:18:6,0:9,3:12,3,2,1	RY1114T6	chr1_58613984_C>T	11	0	15	3	intergenic_region	MODIFIER	Ndufb3-Gm10068	PASS	snv	C>T	G:C>A:T	2	.
chr1	59841424	.	C	T	.	haplotype;normal_artifact;strand_bias	AS_FilterStatus=strand_bias;AS_SB_TABLE=83,19|6,0;DP=122;ECNT=2;GERMQ=93;MBQ=34,26;MFRL=142,155;MMQ=60,60;MPOS=14;NALOD=-4.431e+00;NLOD=3.25;POPAF=6.00;TLOD=7.75;ANN=T|splice_region_variant&intron_variant|LOW|Bmpr2|ENSMUSG00000067336|transcript|ENSMUST00000087435|protein_coding|3/12|c.419-7C>T||||||	GT:AD:AF:DP:F1R2:F2R1:PGT:PID:PS:SB	0|0:46,2:0.069:48:21,0:22,2:0|1:59841424_C_T:59841424:39,7,2,0	0|1:56,4:0.086:60:17,0:37,3:0|1:59841424_C_T:59841424:44,12,4,0	RY1114T6	chr1_59841424_C>T	46	2	56	4	splice_region_variant&intron_variant	LOW	Bmpr2	.	snv	C>T	G:C>A:T	1	.
chr1	59841429	.	AGG	TTT	.	base_qual;haplotype;normal_artifact;strand_bias	AS_FilterStatus=base_qual,strand_bias;AS_SB_TABLE=116,26|5,0;DP=149;ECNT=2;GERMQ=93;MBQ=32,10;MFRL=140,165;MMQ=60,60;MPOS=21;NALOD=-3.967e+00;NLOD=9.06;POPAF=6.00;TLOD=5.47;ANN=TTT|splice_acceptor_variant&missense_variant&splice_region_variant&intron_variant|HIGH|Bmpr2|ENSMUSG00000067336|transcript|ENSMUST00000087435|protein_coding|4/13|c.419-2_419delAGGinsTTT|p.Ser140Ile||419/3117|140/1038||	GT:AD:AF:DP:F1R2:F2R1:PGT:PID:PS:SB	0|0:70,2:0.048:72:27,0:34,1:0|1:59841424_C_T:59841424:58,12,2,0	0|1:72,3:0.062:75:21,0:46,1:0|1:59841424_C_T:59841424:58,14,3,0	RY1114T6	chr1_59841429_AGG>TTT	70	2	72	3	splice_acceptor_variant&missense_variant&splice_region_variant&intron_variant	HIGH	Bmpr2	.	indel	.	.	1	.
chr1	59958455	.	C	A	.	PASS	AS_FilterStatus=SITE;AS_SB_TABLE=6,64|1,2;DP=75;ECNT=1;GERMQ=93;MBQ=36,20;MFRL=165,99;MMQ=60,60;MPOS=9;NALOD=1.58;NLOD=11.14;POPAF=6.00;TLOD=4.84;ANN=A|intron_variant|MODIFIER|Fam117b|ENSMUSG00000041040|transcript|ENSMUST00000036540|protein_coding|4/7|c.945+20C>A||||||	GT:AD:AF:DP:F1R2:F2R1:SB	0/0:38,0:0.026:38:16,0:22,0:3,35,0,0	0/1:32,3:0.090:35:10,1:22,2:3,29,1,2	RY1114T6	chr1_59958455_C>A	38	0	32	3	intron_variant	MODIFIER	Fam117b	PASS	snv	C>A	G:C>T:A	1	PASS
chr1	60448281	.	ATG	A	.	slippage;weak_evidence	AS_FilterStatus=weak_evidence;AS_SB_TABLE=1,32|0,3;DP=62;ECNT=1;GERMQ=36;MBQ=34,36;MFRL=179,193;MMQ=60,60;MPOS=25;NALOD=1.36;NLOD=5.06;POPAF=6.00;RPA=8,7;RU=TG;STR;STRQ=1;TLOD=6.91;ANN=A|intron_variant|MODIFIER|Abi2|ENSMUSG00000026782|transcript|ENSMUST00000052332|protein_coding|6/8|c.832+95_832+96delGT||||||INFO_REALIGN_3_PRIME	GT:AD:AF:DP:F1R2:F2R1:SB	0/0:17,0:0.045:17:6,0:11,0:0,17,0,0	0/1:16,3:0.187:19:6,1:10,2:1,15,0,3	RY1114T6	chr1_60448281_ATG>A	17	0	16	3	intron_variant	MODIFIER	Abi2	PASS	indel	.	.	2	.
chr1	63086152	.	C	A	.	strand_bias;weak_evidence	AS_FilterStatus=weak_evidence,strand_bias;AS_SB_TABLE=44,45|2,0;DP=93;ECNT=1;GERMQ=93;MBQ=35,37;MFRL=151,215;MMQ=60,60;MPOS=14;NALOD=1.57;NLOD=10.54;POPAF=6.00;TLOD=3.81;ANN=A|missense_variant|MODERATE|Ino80d|ENSMUSG00000040865|transcript|ENSMUST00000165066|protein_coding|5/12|c.465G>T|p.Glu155Asp|746/13529|465/3066|155/1021||	GT:AD:AF:DP:F1R2:F2R1:SB	0/0:47,0:0.026:47:19,0:28,0:22,25,0,0	0/1:42,2:0.075:44:19,0:23,2:22,20,2,0	RY1114T6	chr1_63086152_C>A	47	0	42	2	missense_variant	MODERATE	Ino80d	.	snv	C>A	G:C>T:A	1	.
chr1	65551016	.	T	C	.	weak_evidence	AS_FilterStatus=weak_evidence;AS_SB_TABLE=6,14|1,1;DP=22;ECNT=1;GERMQ=33;MBQ=28,20;MFRL=150,166;MMQ=60,60;MPOS=18;NALOD=1.000;NLOD=2.71;POPAF=6.00;TLOD=3.15;ANN=C|upstream_gene_variant|MODIFIER|Gm8805|ENSMUSG00000082774|transcript|ENSMUST00000117848|processed_pseudogene||n.-1666T>C|||||1666|,C|non_coding_transcript_exon_variant|MODIFIER|Gm5255|ENSMUSG00000082565|transcript|ENSMUST00000120125|proc…	GT:AD:AF:DP:F1R2:F2R1:SB	0/0:12,0:0.091:12:7,0:5,0:4,8,0,0	0/1:8,2:0.222:10:7,2:1,0:2,6,1,1	RY1114T6	chr1_65551016_T>C	12	0	8	2	upstream_gene_variant	MODIFIER	Gm8805	.	snv	T>C	A:T>G:C	1	.
chr1	71292407	.	G	T	.	PASS	AS_FilterStatus=SITE;AS_SB_TABLE=102,48|3,2;DP=165;ECNT=1;GERMQ=93;MBQ=32,36;MFRL=140,160;MMQ=60,60;MPOS=21;NALOD=1.77;NLOD=17.11;POPAF=6.00;TLOD=9.62;ANN=T|splice_region_variant&intron_variant|LOW|Abca12|ENSMUSG00000050296|transcript|ENSMUST00000087268|protein_coding|27/52|c.3976+7C>A||||||	GT:AD:AF:DP:F1R2:F2R1:SB	0/0:73,0:0.017:73:24,0:48,0:53,20,0,0	0/1:77,5:0.079:82:26,1:51,4:49,28,3,2	RY1114T6	chr1_71292407_G>T	73	0	77	5	splice_region_variant&intron_variant	LOW	Abca12	PASS	snv	G>T	G:C>T:A	1	PASS
chr1	73916781	.	AAC	A	.	germline;slippage;weak_evidence	AS_FilterStatus=weak_evidence;AS_SB_TABLE=10,0|3,0;DP=16;ECNT=1;GERMQ=1;MBQ=35,37;MFRL=173,174;MMQ=60,60;MPOS=21;NALOD=0.714;NLOD=2.38;POPAF=6.00;RPA=23,22;RU=AC;STR;STRQ=1;TLOD=6.42;ANN=A|intron_variant|MODIFIER|Tns1|ENSMUSG00000055322|transcript|ENSMUST00000169786|protein_coding|33/34|c.5489+83_5489+84delGT||||||	GT:AD:AF:DP:F1R2:F2R1:SB	0/0:8,0:0.097:8:5,0:3,0:8,0,0,0	0/1:2,3:0.576:5:1,1:1,2:2,0,3,0	RY1114T6	chr1_73916781_AAC>A	8	0	2	3	intron_variant	MODIFIER	Tns1	.	indel	.	.	1	.
chr1	74159041	.	G	A	.	clustered_events;haplotype;normal_artifact;weak_evidence	AS_FilterStatus=weak_evidence;AS_SB_TABLE=36,51|1,2;DP=92;ECNT=4;GERMQ=93;MBQ=33,34;MFRL=156,123;MMQ=60,60;MPOS=36;NALOD=-1.450e+00;NLOD=5.43;POPAF=6.00;TLOD=4.54;ANN=A|synonymous_variant|LOW|Cxcr2|ENSMUSG00000026180|transcript|ENSMUST00000027372|protein_coding|2/3|c.693G>A|p.Gly231Gly|843/2220|693/1080|231/359||	GT:AD:AF:DP:F1R2:F2R1:PGT:PID:PS:SB	0|0:42,1:0.057:43:14,1:28,0:0|1:74159041_G_A:74159041:19,23,0,1	0|1:45,2:0.074:47:13,1:31,1:0|1:74159041_G_A:74159041:17,28,1,1	RY1114T6	chr1_74159041_G>A	42	1	45	2	synonymous_variant	LOW	Cxcr2	.	snv	G>A	G:C>A:T	1	.
chr1	74159047	.	A	C	.	clustered_events;haplotype;normal_artifact;weak_evidence	AS_FilterStatus=weak_evidence;AS_SB_TABLE=33,50|1,2;DP=86;ECNT=4;GERMQ=93;MBQ=34,37;MFRL=156,123;MMQ=60,60;MPOS=42;NALOD=-1.400e+00;NLOD=6.04;POPAF=6.00;TLOD=4.59;ANN=C|synonymous_variant|LOW|Cxcr2|ENSMUSG00000026180|transcript|ENSMUST00000027372|protein_coding|2/3|c.699A>C|p.Thr233Thr|849/2220|699/1080|233/359||	GT:AD:AF:DP:F1R2:F2R1:PGT:PID:PS:SB	0|0:44,1:0.054:45:14,1:27,0:0|1:74159041_G_A:74159041:20,24,0,1	0|1:39,2:0.076:41:10,1:27,1:0|1:74159041_G_A:74159041:13,26,1,1	RY1114T6	chr1_74159047_A>C	44	1	39	2	synonymous_variant	LOW	Cxcr2	.	snv	A>C	A:T>C:G	1	.
chr1	74159053	.	C	T	.	clustered_events;haplotype;normal_artifact	AS_FilterStatus=SITE;AS_SB_TABLE=32,47|1,2;DP=82;ECNT=4;GERMQ=93;MBQ=36,35;MFRL=156,123;MMQ=60,60;MPOS=48;NALOD=-1.400e+00;NLOD=6.04;POPAF=6.00;TLOD=4.77;ANN=T|synonymous_variant|LOW|Cxcr2|ENSMUSG00000026180|transcript|ENSMUST00000027372|protein_coding|2/3|c.705C>T|p.Arg235Arg|855/2220|705/1080|235/359||	GT:AD:AF:DP:F1R2:F2R1:PGT:PID:PS:SB	0|0:45,1:0.054:46:16,1:26,0:0|1:74159041_G_A:74159041:20,25,0,1	0|1:34,2:0.088:36:8,1:25,1:0|1:74159041_G_A:74159041:12,22,1,1	RY1114T6	chr1_74159053_C>T	45	1	34	2	synonymous_variant	LOW	Cxcr2	.	snv	C>T	G:C>A:T	1	.
chr1	74159059	.	C	G	.	clustered_events;haplotype;normal_artifact;weak_evidence	AS_FilterStatus=weak_evidence;AS_SB_TABLE=32,47|1,2;DP=84;ECNT=4;GERMQ=93;MBQ=36,37;MFRL=158,123;MMQ=60,60;MPOS=45;NALOD=-1.450e+00;NLOD=5.43;POPAF=6.00;TLOD=4.73;ANN=G|synonymous_variant|LOW|Cxcr2|ENSMUSG00000026180|transcript|ENSMUST00000027372|protein_coding|2/3|c.711C>G|p.Leu237Leu|861/2220|711/1080|237/359||	GT:AD:AF:DP:F1R2:F2R1:PGT:PID:PS:SB	0|0:44,1:0.057:45:16,1:27,0:0|1:74159041_G_A:74159041:20,24,0,1	0|1:35,2:0.085:37:9,1:26,1:0|1:74159041_G_A:74159041:12,23,1,1	RY1114T6	chr1_74159059_C>G	44	1	35	2	synonymous_variant	LOW	Cxcr2	.	snv	C>G	G:C>C:G	1	.
chr1	74236807	.	GCCC	G	.	germline	AS_FilterStatus=SITE;AS_SB_TABLE=13,6|2,2;DP=24;ECNT=1;GERMQ=1;MBQ=20,20;MFRL=162,131;MMQ=60,60;MPOS=32;NALOD=0.954;NLOD=2.41;POPAF=6.00;TLOD=13.75;ANN=G|5_prime_UTR_variant|MODIFIER|Arpc2|ENSMUSG00000006304|transcript|ENSMUST00000006467|protein_coding|1/10|c.-18_-16delCCC|||||16|	GT:AD:AF:DP:F1R2:F2R1:SB	0/0:11,0:0.100:11:2,0:8,0:8,3,0,0	0/1:8,4:0.300:12:6,0:2,4:5,3,2,2	RY1114T6	chr1_74236807_GCCC>G	11	0	8	4	5_prime_UTR_variant	MODIFIER	Arpc2	PASS	indel	.	.	1	.
chr1	74946641	.	C	A	.	clustered_events;haplotype	AS_FilterStatus=SITE;AS_SB_TABLE=19,22|1,1;DP=43;ECNT=10;GERMQ=84;MBQ=32,20;MFRL=154,120;MMQ=60,60;MPOS=30;NALOD=1.36;NLOD=6.62;POPAF=6.00;TLOD=6.88;ANN=A|synonymous_variant|LOW|Ihh|ENSMUSG00000006538|transcript|ENSMUST00000164097|protein_coding|3/3|c.798G>T|p.Arg266Arg|1121/2443|798/1350|266/449||	GT:AD:AF:DP:F1R2:F2R1:PGT:PID:PS:SB	0|0:28,0:0.042:28:12,0:14,0:0|1:74946641_C_A:74946641:13,15,0,0	0|1:13,2:0.154:15:7,0:6,2:0|1:74946641_C_A:74946641:6,7,1,1	RY1114T6	chr1_74946641_C>A	28	0	13	2	synonymous_variant	LOW	Ihh	.	snv	C>A	G:C>T:A	1	.
chr1	74946650	.	T	C	.	clustered_events;haplotype	AS_FilterStatus=SITE;AS_SB_TABLE=21,17|1,1;DP=40;ECNT=10;GERMQ=76;MBQ=35,20;MFRL=155,120;MMQ=60,60;MPOS=39;NALOD=1.34;NLOD=6.32;POPAF=6.00;TLOD=7.05;ANN=C|synonymous_variant|LOW|Ihh|ENSMUSG00000006538|transcript|ENSMUST00000164097|protein_coding|3/3|c.789A>G|p.Pro263Pro|1112/2443|789/1350|263/449||	GT:AD:AF:DP:F1R2:F2R1:PGT:PID:PS:SB	0|0:27,0:0.043:27:11,0:16,0:0|1:74946641_C_A:74946641:14,13,0,0	0|1:11,2:0.182:13:5,0:5,2:0|1:74946641_C_A:74946641:7,4,1,1	RY1114T6	chr1_74946650_T>C	27	0	11	2	synonymous_variant	LOW	Ihh	.	snv	T>C	A:T>G:C	1	.
chr1	74946654	.	T	C	.	clustered_events;haplotype	AS_FilterStatus=SITE;AS_SB_TABLE=20,17|1,1;DP=39;ECNT=10;GERMQ=74;MBQ=34,20;MFRL=155,120;MMQ=60,60;MPOS=41;NALOD=1.34;NLOD=6.32;POPAF=6.00;TLOD=7.05;ANN=C|missense_variant|MODERATE|Ihh|ENSMUSG00000006538|transcript|ENSMUST00000164097|protein_coding|3/3|c.785A>G|p.Lys262Arg|1108/2443|785/1350|262/449||	GT:AD:AF:DP:F1R2:F2R1:PGT:PID:PS:SB	0|0:27,0:0.043:27:11,0:16,0:0|1:74946641_C_A:74946641:14,13,0,0	0|1:10,2:0.182:12:5,0:4,2:0|1:74946641_C_A:74946641:6,4,1,1	RY1114T6	chr1_74946654_T>C	27	0	10	2	missense_variant	MODERATE	Ihh	.	snv	T>C	A:T>G:C	1	.
chr1	74946656	.	T	C	.	clustered_events;haplotype	AS_FilterStatus=SITE;AS_SB_TABLE=19,17|1,1;DP=38;ECNT=10;GERMQ=71;MBQ=33,20;MFRL=156,120;MMQ=60,60;MPOS=41;NALOD=1.34;NLOD=6.32;POPAF=6.00;TLOD=7.05;ANN=C|synonymous_variant|LOW|Ihh|ENSMUSG00000006538|transcript|ENSMUST00000164097|protein_coding|3/3|c.783A>G|p.Val261Val|1106/2443|783/1350|261/449||	GT:AD:AF:DP:F1R2:F2R1:PGT:PID:PS:SB	0|0:27,0:0.043:27:11,0:16,0:0|1:74946641_C_A:74946641:14,13,0,0	0|1:9,2:0.182:11:5,0:4,2:0|1:74946641_C_A:74946641:5,4,1,1	RY1114T6	chr1_74946656_T>C	27	0	9	2	synonymous_variant	LOW	Ihh	.	snv	T>C	A:T>G:C	1	.
chr1	74946659	.	A	G	.	clustered_events;haplotype	AS_FilterStatus=SITE;AS_SB_TABLE=19,17|1,1;DP=38;ECNT=10;GERMQ=71;MBQ=35,20;MFRL=156,120;MMQ=60,60;MPOS=41;NALOD=1.34;NLOD=6.32;POPAF=6.00;TLOD=7.05;ANN=G|synonymous_variant|LOW|Ihh|ENSMUSG00000006538|transcript|ENSMUST00000164097|protein_coding|3/3|c.780T>C|p.Ala260Ala|1103/2443|780/1350|260/449||	GT:AD:AF:DP:F1R2:F2R1:PGT:PID:PS:SB	0|0:27,0:0.043:27:11,0:16,0:0|1:74946641_C_A:74946641:14,13,0,0	0|1:9,2:0.182:11:4,0:4,2:0|1:74946641_C_A:74946641:5,4,1,1	RY1114T6	chr1_74946659_A>G	27	0	9	2	synonymous_variant	LOW	Ihh	.	snv	A>G	A:T>G:C	1	.
chr1	74946667	.	G	A	.	clustered_events;haplotype	AS_FilterStatus=SITE;AS_SB_TABLE=24,18|1,1;DP=44;ECNT=10;GERMQ=87;MBQ=35,20;MFRL=156,120;MMQ=60,60;MPOS=41;NALOD=1.36;NLOD=6.62;POPAF=6.00;TLOD=6.68;ANN=A|synonymous_variant|LOW|Ihh|ENSMUSG00000006538|transcript|ENSMUST00000164097|protein_coding|3/3|c.772C>T|p.Leu258Leu|1095/2443|772/1350|258/449||	GT:AD:AF:DP:F1R2:F2R1:PGT:PID:PS:SB	0|0:28,0:0.042:28:10,0:17,0:0|1:74946641_C_A:74946641:14,14,0,0	0|1:14,2:0.125:16:7,0:7,2:0|1:74946641_C_A:74946641:10,4,1,1	RY1114T6	chr1_74946667_G>A	28	0	14	2	synonymous_variant	LOW	Ihh	.	snv	G>A	G:C>A:T	1	.
chr1	74946678	.	T	G	.	clustered_events;haplotype	AS_FilterStatus=SITE;AS_SB_TABLE=27,17|1,1;DP=46;ECNT=10;GERMQ=91;MBQ=35,20;MFRL=156,120;MMQ=60,60;MPOS=34;NALOD=1.32;NLOD=6.02;POPAF=6.00;TLOD=6.57;ANN=G|missense_variant|MODERATE|Ihh|ENSMUSG00000006538|transcript|ENSMUST00000164097|protein_coding|3/3|c.761A>C|p.Glu254Ala|1084/2443|761/1350|254/449||	GT:AD:AF:DP:F1R2:F2R1:PGT:PID:PS:SB	0|0:26,0:0.045:26:10,0:16,0:0|1:74946678_T_G:74946678:13,13,0,0	0|1:18,2:0.111:20:8,0:10,2:0|1:74946678_T_G:74946678:14,4,1,1	RY1114T6	chr1_74946678_T>G	26	0	18	2	missense_variant	MODERATE	Ihh	.	snv	T>G	A:T>C:G	1	.
chr1	74946683	.	GT	AC	.	clustered_events;haplotype	AS_FilterStatus=SITE;AS_SB_TABLE=27,17|1,1;DP=46;ECNT=10;GERMQ=93;MBQ=31,20;MFRL=156,120;MMQ=60,60;MPOS=29;NALOD=1.34;NLOD=6.32;POPAF=6.00;TLOD=6.51;ANN=AC|missense_variant|MODERATE|Ihh|ENSMUSG00000006538|transcript|ENSMUST00000164097|protein_coding|3/3|c.755_756delACinsGT|p.Asn252Ser|1079/2443|755/1350|252/449||	GT:AD:AF:DP:F1R2:F2R1:PGT:PID:PS:SB	0|0:25,0:0.043:25:9,0:15,0:0|1:74946678_T_G:74946678:12,13,0,0	0|1:19,2:0.105:21:9,0:10,2:0|1:74946678_T_G:74946678:15,4,1,1	RY1114T6	chr1_74946683_GT>AC	25	0	19	2	missense_variant	MODERATE	Ihh	.	indel	.	.	1	.
chr1	74946689	.	T	C	.	clustered_events;haplotype	AS_FilterStatus=SITE;AS_SB_TABLE=27,17|1,1;DP=46;ECNT=10;GERMQ=93;MBQ=34,20;MFRL=157,120;MMQ=60,60;MPOS=23;NALOD=1.38;NLOD=6.92;POPAF=6.00;TLOD=6.57;ANN=C|synonymous_variant|LOW|Ihh|ENSMUSG00000006538|transcript|ENSMUST00000164097|protein_coding|3/3|c.750A>G|p.Leu250Leu|1073/2443|750/1350|250/449||	GT:AD:AF:DP:F1R2:F2R1:PGT:PID:PS:SB	0|0:26,0:0.040:26:8,0:14,0:0|1:74946678_T_G:74946678:13,13,0,0	0|1:18,2:0.111:20:7,0:9,2:0|1:74946678_T_G:74946678:14,4,1,1	RY1114T6	chr1_74946689_T>C	26	0	18	2	synonymous_variant	LOW	Ihh	.	snv	T>C	A:T>G:C	1	.
chr1	74946695	.	C	T	.	clustered_events;haplotype	AS_FilterStatus=SITE;AS_SB_TABLE=26,14|1,1;DP=46;ECNT=10;GERMQ=90;MBQ=37,20;MFRL=157,120;MMQ=60,60;MPOS=17;NALOD=1.31;NLOD=5.72;POPAF=6.00;TLOD=6.57;ANN=T|synonymous_variant|LOW|Ihh|ENSMUSG00000006538|transcript|ENSMUST00000164097|protein_coding|3/3|c.744G>A|p.Val248Val|1067/2443|744/1350|248/449||	GT:AD:AF:DP:F1R2:F2R1:PGT:PID:PS:SB	0|0:21,0:0.047:21:8,0:12,0:0|1:74946678_T_G:74946678:12,9,0,0	0|1:19,2:0.111:21:6,0:11,2:0|1:74946678_T_G:74946678:14,5,1,1	RY1114T6	chr1_74946695_C>T	21	0	19	2	synonymous_variant	LOW	Ihh	.	snv	C>T	G:C>A:T	1	.
chr1	75046601	.	G	T	.	weak_evidence	AS_FilterStatus=weak_evidence;AS_SB_TABLE=51,59|1,2;DP=120;ECNT=1;GERMQ=93;MBQ=20,20;MFRL=151,140;MMQ=60,60;MPOS=10;NALOD=1.55;NLOD=10.19;POPAF=6.00;TLOD=4.27;ANN=T|missense_variant|MODERATE|Nhej1|ENSMUSG00000026162|transcript|ENSMUST00000152855|protein_coding|1/5|c.39C>A|p.Ser13Arg|39/1053|39/498|13/165||WARNING_TRANSCRIPT_NO_START_CODON	GT:AD:AF:DP:F1R2:F2R1:SB	0/0:47,0:0.028:47:22,0:23,0:21,26,0,0	0/1:63,3:0.057:66:20,2:42,1:30,33,1,2	RY1114T6	chr1_75046601_G>T	47	0	63	3	missense_variant	MODERATE	Nhej1	PASS	snv	G>T	G:C>T:A	1	.
chr1	75186261	.	A	G	.	clustered_events;haplotype;normal_artifact;weak_evidence	AS_FilterStatus=weak_evidence;AS_SB_TABLE=61,44|2,1;DP=112;ECNT=6;GERMQ=93;MBQ=35,31;MFRL=161,137;MMQ=60,60;MPOS=16;NALOD=-1.255e+00;NLOD=7.84;POPAF=6.00;TLOD=4.25;ANN=G|synonymous_variant|LOW|Atg9a|ENSMUSG00000033124|transcript|ENSMUST00000040689|protein_coding|8/16|c.1194T>C|p.Asp398Asp|1378/3764|1194/2520|398/839||	GT:AD:AF:DP:F1R2:F2R1:PGT:PID:PS:SB	0|0:47,1:0.046:48:24,1:21,0:0|1:75186261_A_G:75186261:27,20,1,0	0|1:58,2:0.060:60:21,2:36,0:0|1:75186261_A_G:75186261:34,24,1,1	RY1114T6	chr1_75186261_A>G	47	1	58	2	synonymous_variant	LOW	Atg9a	.	snv	A>G	A:T>G:C	1	.
chr1	75186267	.	G	A	.	clustered_events;haplotype;normal_artifact;weak_evidence	AS_FilterStatus=weak_evidence;AS_SB_TABLE=61,45|2,1;DP=112;ECNT=6;GERMQ=93;MBQ=36,34;MFRL=161,137;MMQ=60,60;MPOS=22;NALOD=-1.234e+00;NLOD=8.14;POPAF=6.00;TLOD=4.23;ANN=A|synonymous_variant|LOW|Atg9a|ENSMUSG00000033124|transcript|ENSMUST00000040689|protein_coding|8/16|c.1188C>T|p.Ile396Ile|1372/3764|1188/2520|396/839||	GT:AD:AF:DP:F1R2:F2R1:PGT:PID:PS:SB	0|0:49,1:0.045:50:27,1:21,0:0|1:75186261_A_G:75186261:28,21,1,0	0|1:57,2:0.059:59:22,2:32,0:0|1:75186261_A_G:75186261:33,24,1,1	RY1114T6	chr1_75186267_G>A	49	1	57	2	synonymous_variant	LOW	Atg9a	.	snv	G>A	G:C>A:T	1	.
chr1	75186315	.	A	T	.	clustered_events;normal_artifact;weak_evidence	AS_FilterStatus=weak_evidence;AS_SB_TABLE=57,56|2,3;DP=123;ECNT=6;GERMQ=93;MBQ=20,20;MFRL=152,137;MMQ=60,60;MPOS=30;NALOD=-1.624e+00;NLOD=8.60;POPAF=6.00;TLOD=4.04;ANN=T|synonymous_variant|LOW|Atg9a|ENSMUSG00000033124|transcript|ENSMUST00000040689|protein_coding|8/16|c.1140T>A|p.Gly380Gly|1324/3764|1140/2520|380/839||	GT:AD:AF:DP:F1R2:F2R1:SB	0/0:60,2:0.042:62:29,2:31,0:30,30,1,1	0/1:53,3:0.068:56:21,3:32,0:27,26,1,2	RY1114T6	chr1_75186315_A>T	60	2	53	3	synonymous_variant	LOW	Atg9a	.	snv	A>T	A:T>T:A	1	.
chr1	75186333	.	A	T	.	clustered_events;haplotype;normal_artifact	AS_FilterStatus=SITE;AS_SB_TABLE=55,59|2,3;DP=123;ECNT=6;GERMQ=93;MBQ=23,36;MFRL=151,137;MMQ=60,60;MPOS=28;NALOD=-5.661e+00;NLOD=4.85;POPAF=6.00;TLOD=8.49;ANN=T|synonymous_variant|LOW|Atg9a|ENSMUSG00000033124|transcript|ENSMUST00000040689|protein_coding|8/16|c.1122T>A|p.Thr374Thr|1306/3764|1122/2520|374/839||	GT:AD:AF:DP:F1R2:F2R1:PGT:PID:PS:SB	0|0:61,2:0.041:63:26,2:34,0:0|1:75186333_A_T:75186333:29,32,1,1	0|1:53,3:0.068:56:19,3:33,0:0|1:75186333_A_T:75186333:26,27,1,2	RY1114T6	chr1_75186333_A>T	61	2	53	3	synonymous_variant	LOW	Atg9a	.	snv	A>T	A:T>T:A	1	.
chr1	75186338	.	GC	AA	.	clustered_events;haplotype;normal_artifact	AS_FilterStatus=SITE;AS_SB_TABLE=50,62|2,2;DP=116;ECNT=6;GERMQ=93;MBQ=31,28;MFRL=151,135;MMQ=60,60;MPOS=31;NALOD=-5.661e+00;NLOD=4.85;POPAF=6.00;TLOD=5.76;ANN=AA|synonymous_variant|LOW|Atg9a|ENSMUSG00000033124|transcript|ENSMUST00000040689|protein_coding|8/16|c.1116_1117delGCinsTT|p.374|1301/3764|1116/2520|372/839||	GT:AD:AF:DP:F1R2:F2R1:PGT:PID:PS:SB	0|0:58,2:0.041:60:22,2:34,0:0|1:75186333_A_T:75186333:25,33,1,1	0|1:54,2:0.046:56:19,2:31,0:0|1:75186333_A_T:75186333:25,29,1,1	RY1114T6	chr1_75186338_GC>AA	58	2	54	2	synonymous_variant	LOW	Atg9a	.	indel	.	.	1	.
chr1	75186342	.	C	A	.	clustered_events;haplotype;normal_artifact	AS_FilterStatus=SITE;AS_SB_TABLE=46,57|2,2;DP=108;ECNT=6;GERMQ=93;MBQ=29,29;MFRL=151,135;MMQ=60,60;MPOS=27;NALOD=-5.714e+00;NLOD=3.94;POPAF=6.00;TLOD=5.80;ANN=A|synonymous_variant|LOW|Atg9a|ENSMUSG00000033124|transcript|ENSMUST00000040689|protein_coding|8/16|c.1113G>T|p.Pro371Pro|1297/3764|1113/2520|371/839||	GT:AD:AF:DP:F1R2:F2R1:PGT:PID:PS:SB	0|0:52,2:0.044:54:18,2:33,0:0|1:75186333_A_T:75186333:22,30,1,1	0|1:51,2:0.049:53:19,2:31,0:0|1:75186333_A_T:75186333:24,27,1,1	RY1114T6	chr1_75186342_C>A	52	2	51	2	synonymous_variant	LOW	Atg9a	.	snv	C>A	G:C>T:A	1	.
chr1	75199082	.	A	G	.	clustered_events;haplotype;strand_bias;weak_evidence	AS_FilterStatus=weak_evidence,strand_bias;AS_SB_TABLE=76,53|1,0;DP=132;ECNT=4;GERMQ=93;MBQ=35,38;MFRL=145,94;MMQ=60,60;MPOS=28;NALOD=1.75;NLOD=16.56;POPAF=6.00;TLOD=3.60;ANN=G|synonymous_variant|LOW|Ankzf1|ENSMUSG00000026199|transcript|ENSMUST00000152233|protein_coding|13/13|c.2142A>G|p.Gly714Gly|2434/2739|2142/2247|714/748||,G|downstream_gene_variant|MODIFIER|Glb1l|ENSMUSG00000026200|transcript|…	GT:AD:AF:DP:F1R2:F2R1:PGT:PID:PS:SB	0|0:76,0:0.017:76:26,0:48,0:0|1:75199082_A_G:75199082:42,34,0,0	0|1:53,1:0.041:54:16,0:35,1:0|1:75199082_A_G:75199082:34,19,1,0	RY1114T6	chr1_75199082_A>G	76	0	53	1	synonymous_variant	LOW	Ankzf1	.	snv	A>G	A:T>G:C	1	.
chr1	75199084	.	TG	CA	.	clustered_events;haplotype;weak_evidence	AS_FilterStatus=weak_evidence;AS_SB_TABLE=77,54|1,1;DP=135;ECNT=4;GERMQ=93;MBQ=34,37;MFRL=145,94;MMQ=60,60;MPOS=30;NALOD=1.75;NLOD=16.56;POPAF=6.00;TLOD=3.58;ANN=CA|missense_variant|MODERATE|Ankzf1|ENSMUSG00000026199|transcript|ENSMUST00000152233|protein_coding|13/13|c.2144_2145delTGinsCA|p.Val715Ala|2436/2739|2144/2247|715/748||,CA|downstream_gene_variant|MODIFIER|Glb1l|ENSMUSG00000026200|transc…	GT:AD:AF:DP:F1R2:F2R1:PGT:PID:PS:SB	0|0:77,0:0.017:77:26,0:50,0:0|1:75199082_A_G:75199082:42,35,0,0	0|1:54,2:0.040:56:16,0:37,1:0|1:75199082_A_G:75199082:35,19,1,1	RY1114T6	chr1_75199084_TG>CA	77	0	54	2	missense_variant	MODERATE	Ankzf1	.	indel	.	.	1	.
chr1	75199100	.	C	G	.	clustered_events;haplotype	AS_FilterStatus=SITE;AS_SB_TABLE=73,61|2,1;DP=140;ECNT=4;GERMQ=93;MBQ=32,20;MFRL=147,94;MMQ=60,60;MPOS=31;NALOD=1.74;NLOD=16.26;POPAF=6.00;TLOD=8.10;ANN=G|synonymous_variant|LOW|Ankzf1|ENSMUSG00000026199|transcript|ENSMUST00000152233|protein_coding|13/13|c.2160C>G|p.Leu720Leu|2452/2739|2160/2247|720/748||,G|downstream_gene_variant|MODIFIER|Glb1l|ENSMUSG00000026200|transcript|ENSMUST00000113623|pr…	GT:AD:AF:DP:F1R2:F2R1:PGT:PID:PS:SB	0|0:76,0:0.018:76:27,0:46,0:0|1:75199100_C_G:75199100:36,40,0,0	0|1:58,3:0.059:61:17,0:40,2:0|1:75199100_C_G:75199100:37,21,2,1	RY1114T6	chr1_75199100_C>G	76	0	58	3	synonymous_variant	LOW	Ankzf1	PASS	snv	C>G	G:C>C:G	1	.
chr1	75199102	.	T	C	.	clustered_events;haplotype	AS_FilterStatus=SITE;AS_SB_TABLE=73,61|2,1;DP=139;ECNT=4;GERMQ=93;MBQ=30,20;MFRL=147,94;MMQ=60,60;MPOS=17;NALOD=1.74;NLOD=16.26;POPAF=6.00;TLOD=8.11;ANN=C|missense_variant|MODERATE|Ankzf1|ENSMUSG00000026199|transcript|ENSMUST00000152233|protein_coding|13/13|c.2162T>C|p.Ile721Thr|2454/2739|2162/2247|721/748||,C|downstream_gene_variant|MODIFIER|Glb1l|ENSMUSG00000026200|transcript|ENSMUST00000113623…	GT:AD:AF:DP:F1R2:F2R1:PGT:PID:PS:SB	0|0:76,0:0.018:76:28,0:47,0:0|1:75199100_C_G:75199100:36,40,0,0	0|1:58,3:0.059:61:18,1:36,2:0|1:75199100_C_G:75199100:37,21,2,1	RY1114T6	chr1_75199102_T>C	76	0	58	3	missense_variant	MODERATE	Ankzf1	PASS	snv	T>C	A:T>G:C	1	.
chr1	75535057	.	G	A	.	weak_evidence	AS_FilterStatus=weak_evidence;AS_SB_TABLE=41,3|2,0;DP=48;ECNT=1;GERMQ=93;MBQ=36,37;MFRL=165,192;MMQ=60,60;MPOS=26;NALOD=1.41;NLOD=7.22;POPAF=6.00;TLOD=4.81;ANN=A|intron_variant|MODIFIER|Stk11ip|ENSMUSG00000026213|transcript|ENSMUST00000027414|protein_coding|23/24|c.2822-121G>A||||||	GT:AD:AF:DP:F1R2:F2R1:SB	0/0:25,0:0.038:25:14,0:11,0:24,1,0,0	0/1:19,2:0.142:21:5,0:14,2:17,2,2,0	RY1114T6	chr1_75535057_G>A	25	0	19	2	intron_variant	MODIFIER	Stk11ip	.	snv	G>A	G:C>A:T	1	.
chr1	75556972	.	C	T	.	clustered_events;haplotype	AS_FilterStatus=SITE;AS_SB_TABLE=16,23|1,1;DP=41;ECNT=3;GERMQ=82;MBQ=30,38;MFRL=156,66;MMQ=60,60;MPOS=24;NALOD=1.11;NLOD=3.61;POPAF=6.00;TLOD=5.40;ANN=T|synonymous_variant|LOW|Slc4a3|ENSMUSG00000006576|transcript|ENSMUST00000124341|protein_coding|20/23|c.3237C>T|p.Thr1079Thr|3453/7182|3237/3684|1079/1227||	GT:AD:AF:DP:F1R2:F2R1:PGT:PID:PS:SB	0|0:15,0:0.071:15:5,0:10,0:0|1:75556972_C_T:75556972:4,11,0,0	0|1:24,2:0.136:26:8,1:16,1:0|1:75556972_C_T:75556972:12,12,1,1	RY1114T6	chr1_75556972_C>T	15	0	24	2	synonymous_variant	LOW	Slc4a3	.	snv	C>T	G:C>A:T	1	.
chr1	75556975	.	G	T	.	clustered_events;haplotype	AS_FilterStatus=SITE;AS_SB_TABLE=16,22|1,1;DP=40;ECNT=3;GERMQ=79;MBQ=23,37;MFRL=156,66;MMQ=60,60;MPOS=21;NALOD=1.08;NLOD=3.31;POPAF=6.00;TLOD=5.40;ANN=T|synonymous_variant|LOW|Slc4a3|ENSMUSG00000006576|transcript|ENSMUST00000124341|protein_coding|20/23|c.3240G>T|p.Gly1080Gly|3456/7182|3240/3684|1080/1227||	GT:AD:AF:DP:F1R2:F2R1:PGT:PID:PS:SB	0|0:14,0:0.077:14:4,0:9,0:0|1:75556972_C_T:75556972:4,10,0,0	0|1:24,2:0.136:26:8,1:15,1:0|1:75556972_C_T:75556972:12,12,1,1	RY1114T6	chr1_75556975_G>T	14	0	24	2	synonymous_variant	LOW	Slc4a3	.	snv	G>T	G:C>T:A	1	.
chr1	75556984	.	T	C	.	clustered_events;haplotype	AS_FilterStatus=SITE;AS_SB_TABLE=16,20|1,1;DP=38;ECNT=3;GERMQ=75;MBQ=35,35;MFRL=152,66;MMQ=60,60;MPOS=12;NALOD=1.11;NLOD=3.61;POPAF=6.00;TLOD=5.47;ANN=C|synonymous_variant|LOW|Slc4a3|ENSMUSG00000006576|transcript|ENSMUST00000124341|protein_coding|20/23|c.3249T>C|p.Ile1083Ile|3465/7182|3249/3684|1083/1227||	GT:AD:AF:DP:F1R2:F2R1:PGT:PID:PS:SB	0|0:15,0:0.071:15:6,0:9,0:0|1:75556972_C_T:75556972:6,9,0,0	0|1:21,2:0.143:23:6,1:14,1:0|1:75556972_C_T:75556972:10,11,1,1	RY1114T6	chr1_75556984_T>C	15	0	21	2	synonymous_variant	LOW	Slc4a3	.	snv	T>C	A:T>G:C	1	.
chr1	77373894	.	G	T	.	clustered_events;haplotype	AS_FilterStatus=SITE;AS_SB_TABLE=5,23|1,1;DP=30;ECNT=5;GERMQ=56;MBQ=35,39;MFRL=165,140;MMQ=60,50;MPOS=25;NALOD=1.08;NLOD=3.31;POPAF=6.00;TLOD=6.74;ANN=T|intron_variant|MODIFIER|Epha4|ENSMUSG00000026235|transcript|ENSMUST00000027451|protein_coding|16/17|c.2847-47C>A||||||	GT:AD:AF:DP:F1R2:F2R1:PGT:PID:PS:SB	0|0:13,0:0.077:13:5,0:4,0:0|1:77373894_G_T:77373894:2,11,0,0	0|1:15,2:0.133:17:6,2:7,0:0|1:77373894_G_T:77373894:3,12,1,1	RY1114T6	chr1_77373894_G>T	13	0	15	2	intron_variant	MODIFIER	Epha4	.	snv	G>T	G:C>T:A	1	.
chr1	77373897	.	G	C	.	clustered_events;haplotype	AS_FilterStatus=SITE;AS_SB_TABLE=3,19|1,1;DP=24;ECNT=5;GERMQ=42;MBQ=36,38;MFRL=165,140;MMQ=60,50;MPOS=22;NALOD=0.954;NLOD=2.41;POPAF=6.00;TLOD=6.81;ANN=C|intron_variant|MODIFIER|Epha4|ENSMUSG00000026235|transcript|ENSMUST00000027451|protein_coding|16/17|c.2847-50C>G||||||	GT:AD:AF:DP:F1R2:F2R1:PGT:PID:PS:SB	0|0:9,0:0.100:9:5,0:4,0:0|1:77373894_G_T:77373894:1,8,0,0	0|1:13,2:0.143:15:6,2:7,0:0|1:77373894_G_T:77373894:2,11,1,1	RY1114T6	chr1_77373897_G>C	9	0	13	2	intron_variant	MODIFIER	Epha4	.	snv	G>C	G:C>C:G	1	.
chr1	77373900	.	C	T	.	clustered_events;haplotype	AS_FilterStatus=SITE;AS_SB_TABLE=3,19|1,1;DP=24;ECNT=5;GERMQ=42;MBQ=35,36;MFRL=165,140;MMQ=60,50;MPOS=19;NALOD=0.954;NLOD=2.41;POPAF=6.00;TLOD=6.81;ANN=T|intron_variant|MODIFIER|Epha4|ENSMUSG00000026235|transcript|ENSMUST00000027451|protein_coding|16/17|c.2847-53G>A||||||	GT:AD:AF:DP:F1R2:F2R1:PGT:PID:PS:SB	0|0:9,0:0.100:9:5,0:4,0:0|1:77373894_G_T:77373894:1,8,0,0	0|1:13,2:0.143:15:6,2:7,0:0|1:77373894_G_T:77373894:2,11,1,1	RY1114T6	chr1_77373900_C>T	9	0	13	2	intron_variant	MODIFIER	Epha4	.	snv	C>T	G:C>A:T	1	.
chr1	77373903	.	C	CTTTT	.	clustered_events;haplotype;weak_evidence	AS_FilterStatus=weak_evidence;AS_SB_TABLE=3,19|0,1;DP=23;ECNT=5;GERMQ=17;MBQ=36,38;MFRL=165,140;MMQ=60,40;MPOS=35;NALOD=0.954;NLOD=2.41;POPAF=6.00;TLOD=6.81;ANN=CTTTT|intron_variant|MODIFIER|Epha4|ENSMUSG00000026235|transcript|ENSMUST00000027451|protein_coding|16/17|c.2847-57_2847-56insAAAA||||||	GT:AD:AF:DP:F1R2:F2R1:PGT:PID:PS:SB	0|0:9,0:0.100:9:5,0:3,0:0|1:77373894_G_T:77373894:1,8,0,0	0|1:13,1:0.143:14:6,1:6,0:0|1:77373894_G_T:77373894:2,11,0,1	RY1114T6	chr1_77373903_C>CTTTT	9	0	13	1	intron_variant	MODIFIER	Epha4	.	indel	.	.	1	.
chr1	77373905	.	TCC	T	.	clustered_events;haplotype;weak_evidence	AS_FilterStatus=weak_evidence;AS_SB_TABLE=2,18|0,1;DP=21;ECNT=5;GERMQ=14;MBQ=35,36;MFRL=167,140;MMQ=60,40;MPOS=29;NALOD=0.954;NLOD=2.41;POPAF=6.00;TLOD=6.88;ANN=T|intron_variant|MODIFIER|Epha4|ENSMUSG00000026235|transcript|ENSMUST00000027451|protein_coding|16/17|c.2847-60_2847-59delGG||||||	GT:AD:AF:DP:F1R2:F2R1:PGT:PID:PS:SB	0|0:8,0:0.100:8:5,0:3,0:0|1:77373894_G_T:77373894:0,8,0,0	0|1:12,1:0.154:13:5,1:6,0:0|1:77373894_G_T:77373894:2,10,0,1	RY1114T6	chr1_77373905_TCC>T	8	0	12	1	intron_variant	MODIFIER	Epha4	.	indel	.	.	1	.
chr1	79761616	.	C	A	.	weak_evidence	AS_FilterStatus=weak_evidence;AS_SB_TABLE=7,9|1,1;DP=18;ECNT=1;GERMQ=25;MBQ=25,20;MFRL=149,125;MMQ=60,60;MPOS=31;NALOD=0.954;NLOD=2.41;POPAF=6.00;TLOD=3.44;ANN=A|missense_variant|MODERATE|Wdfy1|ENSMUSG00000073643|transcript|ENSMUST00000113512|protein_coding|1/12|c.85G>T|p.Ala29Ser|154/4551|85/1233|29/410||	GT:AD:AF:DP:F1R2:F2R1:SB	0/0:10,0:0.100:10:7,0:3,0:5,5,0,0	0/1:6,2:0.282:8:4,0:2,2:2,4,1,1	RY1114T6	chr1_79761616_C>A	10	0	6	2	missense_variant	MODERATE	Wdfy1	.	snv	C>A	G:C>T:A	1	.
chr1	80501790	.	C	A	.	PASS	AS_FilterStatus=SITE;AS_SB_TABLE=47,47|1,2;DP=101;ECNT=1;GERMQ=93;MBQ=20,20;MFRL=150,164;MMQ=60,60;MPOS=15;NALOD=1.67;NLOD=13.54;POPAF=6.00;TLOD=5.01;ANN=A|stop_gained|HIGH|Dock10|ENSMUSG00000038608|transcript|ENSMUST00000077946|protein_coding|56/56|c.6481G>T|p.Glu2161*|6586/7303|6481/6564|2161/2187||	GT:AD:AF:DP:F1R2:F2R1:SB	0/0:60,0:0.021:60:21,0:39,0:30,30,0,0	0/1:34,3:0.103:37:8,0:26,3:17,17,1,2	RY1114T6	chr1_80501790_C>A	60	0	34	3	stop_gained	HIGH	Dock10	PASS	snv	C>A	G:C>T:A	1	PASS
chr1	80575955	.	GAC	G	.	base_qual;slippage;weak_evidence	AS_FilterStatus=weak_evidence,base_qual;AS_SB_TABLE=3,30|0,3;DP=94;ECNT=1;GERMQ=35;MBQ=20,12;MFRL=167,195;MMQ=60,60;MPOS=44;NALOD=0.936;NLOD=4.40;POPAF=6.00;RPA=22,21;RU=AC;STR;STRQ=1;TLOD=3.50;ANN=G|intron_variant|MODIFIER|Dock10|ENSMUSG00000038608|transcript|ENSMUST00000077946|protein_coding|15/55|c.1809-19_1809-18delGT||||||	GT:AD:AF:DP:F1R2:F2R1:SB	0/0:15,0:0.045:15:4,0:7,0:1,14,0,0	0/1:18,3:0.186:21:1,0:9,1:2,16,0,3	RY1114T6	chr1_80575955_GAC>G	15	0	18	3	intron_variant	MODIFIER	Dock10	PASS	indel	.	.	1	.
chr1	84383735	.	C	A	.	PASS	AS_FilterStatus=SITE;AS_SB_TABLE=33,11|1,1;DP=49;ECNT=1;GERMQ=93;MBQ=35,37;MFRL=153,202;MMQ=60,60;MPOS=15;NALOD=1.36;NLOD=6.62;POPAF=6.00;TLOD=5.13;ANN=A|intron_variant|MODIFIER|Dner|ENSMUSG00000036766|transcript|ENSMUST00000049126|protein_coding|12/12|c.2102+50G>T||||||	GT:AD:AF:DP:F1R2:F2R1:SB	0/0:26,0:0.042:26:9,0:17,0:21,5,0,0	0/1:18,2:0.176:20:1,0:17,2:12,6,1,1	RY1114T6	chr1_84383735_C>A	26	0	18	2	intron_variant	MODIFIER	Dner	.	snv	C>A	G:C>T:A	1	.
chr1	84760676	.	CA	TC	.	clustered_events;haplotype	AS_FilterStatus=SITE;AS_SB_TABLE=15,2|1,1;DP=19;ECNT=7;GERMQ=30;MBQ=35,37;MFRL=166,123;MMQ=60,60;MPOS=40;NALOD=1.000;NLOD=2.71;POPAF=6.00;TLOD=7.14;ANN=TC|intron_variant|MODIFIER|Trip12|ENSMUSG00000026219|transcript|ENSMUST00000027421|protein_coding|16/40|c.2370+86_2370+87delTGinsGA||||||	GT:AD:AF:DP:F1R2:F2R1:PGT:PID:PS:SB	0|0:10,0:0.091:10:5,0:3,0:0|1:84760676_CA_TC:84760676:9,1,0,0	0|1:7,2:0.200:9:3,2:4,0:0|1:84760676_CA_TC:84760676:6,1,1,1	RY1114T6	chr1_84760676_CA>TC	10	0	7	2	intron_variant	MODIFIER	Trip12	.	indel	.	.	1	.
chr1	84760682	.	C	T	.	clustered_events;haplotype	AS_FilterStatus=SITE;AS_SB_TABLE=17,2|1,1;DP=21;ECNT=7;GERMQ=36;MBQ=35,37;MFRL=169,123;MMQ=60,60;MPOS=41;NALOD=1.04;NLOD=3.01;POPAF=6.00;TLOD=7.05;ANN=T|intron_variant|MODIFIER|Trip12|ENSMUSG00000026219|transcript|ENSMUST00000027421|protein_coding|16/40|c.2370+81G>A||||||	GT:AD:AF:DP:F1R2:F2R1:PGT:PID:PS:SB	0|0:11,0:0.083:11:6,0:4,0:0|1:84760676_CA_TC:84760676:10,1,0,0	0|1:8,2:0.182:10:3,2:5,0:0|1:84760676_CA_TC:84760676:7,1,1,1	RY1114T6	chr1_84760682_C>T	11	0	8	2	intron_variant	MODIFIER	Trip12	.	snv	C>T	G:C>A:T	1	.
chr1	84760684	.	A	T	.	clustered_events;haplotype	AS_FilterStatus=SITE;AS_SB_TABLE=17,2|1,1;DP=21;ECNT=7;GERMQ=36;MBQ=34,38;MFRL=169,123;MMQ=60,60;MPOS=41;NALOD=1.04;NLOD=3.01;POPAF=6.00;TLOD=7.05;ANN=T|intron_variant|MODIFIER|Trip12|ENSMUSG00000026219|transcript|ENSMUST00000027421|protein_coding|16/40|c.2370+79T>A||||||	GT:AD:AF:DP:F1R2:F2R1:PGT:PID:PS:SB	0|0:11,0:0.083:11:6,0:5,0:0|1:84760676_CA_TC:84760676:10,1,0,0	0|1:8,2:0.182:10:3,2:5,0:0|1:84760676_CA_TC:84760676:7,1,1,1	RY1114T6	chr1_84760684_A>T	11	0	8	2	intron_variant	MODIFIER	Trip12	.	snv	A>T	A:T>T:A	1	.
chr1	84760697	.	TTG	T	.	clustered_events;weak_evidence	AS_FilterStatus=weak_evidence;AS_SB_TABLE=21,4|1,1;DP=28;ECNT=7;GERMQ=18;MBQ=34,20;MFRL=166,123;MMQ=60,60;MPOS=40;NALOD=1.08;NLOD=3.31;POPAF=6.00;TLOD=3.79;ANN=T|intron_variant|MODIFIER|Trip12|ENSMUSG00000026219|transcript|ENSMUST00000027421|protein_coding|16/40|c.2370+64_2370+65delCA||||||	GT:AD:AF:DP:F1R2:F2R1:SB	0/0:12,0:0.077:12:6,0:6,0:11,1,0,0	0/1:13,2:0.152:15:5,2:7,0:10,3,1,1	RY1114T6	chr1_84760697_TTG>T	12	0	13	2	intron_variant	MODIFIER	Trip12	.	indel	.	.	1	.
chr1	84760722	.	CA	AC	.	clustered_events;haplotype;weak_evidence	AS_FilterStatus=weak_evidence;AS_SB_TABLE=32,10|1,1;DP=44;ECNT=7;GERMQ=89;MBQ=35,20;MFRL=160,123;MMQ=60,60;MPOS=17;NALOD=1.22;NLOD=4.51;POPAF=6.00;TLOD=4.79;ANN=AC|intron_variant|MODIFIER|Trip12|ENSMUSG00000026219|transcript|ENSMUST00000027421|protein_coding|16/40|c.2370+40_2370+41delTGinsGT||||||	GT:AD:AF:DP:F1R2:F2R1:PGT:PID:PS:SB	0|0:19,0:0.058:19:10,0:7,0:0|1:84760722_CA_AC:84760722:15,4,0,0	0|1:23,2:0.091:25:10,2:12,0:0|1:84760722_CA_AC:84760722:17,6,1,1	RY1114T6	chr1_84760722_CA>AC	19	0	23	2	intron_variant	MODIFIER	Trip12	.	indel	.	.	1	.
chr1	84760728	.	TA	T	.	clustered_events;haplotype;weak_evidence	AS_FilterStatus=weak_evidence;AS_SB_TABLE=37,11|1,1;DP=50;ECNT=7;GERMQ=75;MBQ=33,20;MFRL=160,123;MMQ=60,60;MPOS=11;NALOD=1.27;NLOD=5.11;POPAF=6.00;RPA=2,1;RU=A;STR;STRQ=93;TLOD=4.67;ANN=T|intron_variant|MODIFIER|Trip12|ENSMUSG00000026219|transcript|ENSMUST00000027421|protein_coding|16/40|c.2370+34delT||||||	GT:AD:AF:DP:F1R2:F2R1:PGT:PID:PS:SB	0|0:22,0:0.052:22:11,0:10,0:0|1:84760722_CA_AC:84760722:17,5,0,0	0|1:26,2:0.080:28:11,2:13,0:0|1:84760722_CA_AC:84760722:20,6,1,1	RY1114T6	chr1_84760728_TA>T	22	0	26	2	intron_variant	MODIFIER	Trip12	.	indel	.	.	1	.
chr1	84760735	.	T	C	.	clustered_events;haplotype;strand_bias;weak_evidence	AS_FilterStatus=weak_evidence,strand_bias;AS_SB_TABLE=39,13|0,1;DP=58;ECNT=7;GERMQ=93;MBQ=33,38;MFRL=157,123;MMQ=60,60;MPOS=14;NALOD=1.28;NLOD=5.11;POPAF=6.00;TLOD=4.60;ANN=C|intron_variant|MODIFIER|Trip12|ENSMUSG00000026219|transcript|ENSMUST00000027421|protein_coding|16/40|c.2370+28A>G||||||	GT:AD:AF:DP:F1R2:F2R1:PGT:PID:PS:SB	0|0:23,0:0.050:23:12,0:11,0:0|1:84760722_CA_AC:84760722:17,6,0,0	0|1:29,1:0.074:30:11,1:18,0:0|1:84760722_CA_AC:84760722:22,7,0,1	RY1114T6	chr1_84760735_T>C	23	0	29	1	intron_variant	MODIFIER	Trip12	.	snv	T>C	A:T>G:C	1	.
chr1	84963594	.	T	C	.	map_qual;normal_artifact	AS_FilterStatus=map_qual;AS_SB_TABLE=37,18|3,3;DP=62;ECNT=1;GERMQ=56;MBQ=35,34;MFRL=169,210;MMQ=27,23;MPOS=23;NALOD=-1.413e+00;NLOD=2.97;POPAF=6.00;TLOD=7.08;ANN=C|upstream_gene_variant|MODIFIER|Gm15433|ENSMUSG00000096802|transcript|ENSMUST00000097671|processed_pseudogene||n.-75T>C|||||75|,C|intergenic_region|MODIFIER|Slc16a14-Gm15433|ENSMUSG00000026220-ENSMUSG00000096802|intergenic_region|ENSMUS…	GT:AD:AF:DP:F1R2:F2R1:SB	0/0:33,2:0.098:35:23,1:10,1:22,11,1,1	0/1:22,4:0.199:26:12,2:10,2:15,7,2,2	RY1114T6	chr1_84963594_T>C	33	2	22	4	upstream_gene_variant	MODIFIER	Gm15433	.	snv	T>C	A:T>G:C	3	.
chr1	84964279	.	G	A	.	map_qual;normal_artifact	AS_FilterStatus=map_qual;AS_SB_TABLE=121,26|24,5;DP=187;ECNT=2;GERMQ=89;MBQ=31,36;MFRL=186,197;MMQ=22,22;MPOS=17;NALOD=-8.884e+00;NLOD=4.27;POPAF=6.00;TLOD=33.84;ANN=A|non_coding_transcript_exon_variant|MODIFIER|Gm15433|ENSMUSG00000096802|transcript|ENSMUST00000097671|processed_pseudogene|1/1|n.611G>A||||||	GT:AD:AF:DP:F1R2:F2R1:SB	0/0:78,8:0.101:86:31,4:44,4:70,8,7,1	0/1:69,21:0.236:90:28,8:39,12:51,18,17,4	RY1114T6	chr1_84964279_G>A	78	8	69	21	non_coding_transcript_exon_variant	MODIFIER	Gm15433	.	snv	G>A	G:C>A:T	2	.
chr1	84964355	.	G	A	.	map_qual;normal_artifact;strand_bias;weak_evidence	AS_FilterStatus=weak_evidence,map_qual,strand_bias;AS_SB_TABLE=194,151|2,12;DP=374;ECNT=2;GERMQ=93;MBQ=20,35;MFRL=165,184;MMQ=22,22;MPOS=35;NALOD=-9.009e+00;NLOD=19.36;POPAF=6.00;TLOD=3.86;ANN=A|non_coding_transcript_exon_variant|MODIFIER|Gm15433|ENSMUSG00000096802|transcript|ENSMUST00000097671|processed_pseudogene|1/1|n.687G>A||||||	GT:AD:AF:DP:F1R2:F2R1:SB	0/0:189,9:0.060:198:86,2:102,7:105,84,1,8	0/1:156,5:0.037:161:53,1:103,4:89,67,1,4	RY1114T6	chr1_84964355_G>A	189	9	156	5	non_coding_transcript_exon_variant	MODIFIER	Gm15433	.	snv	G>A	G:C>A:T	4	.
chr1	84992530	.	C	T	.	strand_bias	AS_FilterStatus=strand_bias;AS_SB_TABLE=9,18|2,0;DP=29;ECNT=1;GERMQ=51;MBQ=36,34;MFRL=171,177;MMQ=27,32;MPOS=5;NALOD=1.20;NLOD=4.51;POPAF=6.00;TLOD=5.53;ANN=T|intergenic_region|MODIFIER|Gm15433-C130026I21Rik|ENSMUSG00000096802-ENSMUSG00000052477|intergenic_region|ENSMUSG00000096802-ENSMUSG00000052477|||n.84992530C>T||||||	GT:AD:AF:DP:F1R2:F2R1:SB	0/0:19,0:0.059:19:7,0:11,0:7,12,0,0	0/1:8,2:0.273:10:4,0:4,2:2,6,2,0	RY1114T6	chr1_84992530_C>T	19	0	8	2	intergenic_region	MODIFIER	Gm15433-C130026I21Rik	.	snv	C>T	G:C>A:T	1	.
chr1	85075297	.	C	A	.	normal_artifact	AS_FilterStatus=SITE;AS_SB_TABLE=14,61|0,7;DP=86;ECNT=1;GERMQ=87;MBQ=36,36;MFRL=170,215;MMQ=27,49;MPOS=30;NALOD=-3.419e+00;NLOD=2.78;POPAF=6.00;TLOD=11.75;ANN=A|intragenic_variant|MODIFIER|C130026I21Rik|ENSMUSG00000052477|gene_variant|ENSMUSG00000052477|||n.85075297G>T||||||	GT:AD:AF:DP:F1R2:F2R1:SB	0/0:37,2:0.081:39:23,2:14,0:5,32,0,2	0/1:38,5:0.153:43:17,3:21,2:9,29,0,5	RY1114T6	chr1_85075297_C>A	37	2	38	5	intragenic_variant	MODIFIER	C130026I21Rik	.	snv	C>A	G:C>T:A	2	.
chr1	85094373	.	A	G	.	map_qual;normal_artifact	AS_FilterStatus=map_qual;AS_SB_TABLE=0,273|0,15;DP=296;ECNT=1;GERMQ=93;MBQ=37,36;MFRL=163,152;MMQ=22,22;MPOS=38;NALOD=-6.226e+00;NLOD=21.94;POPAF=6.00;TLOD=6.42;ANN=G|intron_variant|MODIFIER|A530032D15Rik|ENSMUSG00000089844|transcript|ENSMUST00000161724|protein_coding|3/7|c.368-14T>C||||||,G|intragenic_variant|MODIFIER|C130026I21Rik|ENSMUSG00000052477|gene_variant|ENSMUSG00000052477|||n.85094373T…	GT:AD:AF:DP:F1R2:F2R1:SB	0/0:131,7:0.055:138:53,2:77,5:0,131,0,7	0/1:142,8:0.057:150:53,3:88,5:0,142,0,8	RY1114T6	chr1_85094373_A>G	131	7	142	8	intron_variant	MODIFIER	A530032D15Rik	.	snv	A>G	A:T>G:C	1	.
chr1	85099723	.	A	G	.	map_qual	AS_FilterStatus=map_qual;AS_SB_TABLE=0,27|0,4;DP=34;ECNT=1;GERMQ=49;MBQ=33,36;MFRL=172,284;MMQ=24,24;MPOS=13;NALOD=1.27;NLOD=5.11;POPAF=6.00;TLOD=7.03;ANN=G|upstream_gene_variant|MODIFIER|Gm10553|ENSMUSG00000073631|transcript|ENSMUST00000097669|protein_coding||c.-441A>G|||||441|,G|intron_variant|MODIFIER|A530032D15Rik|ENSMUSG00000089844|transcript|ENSMUST00000161724|protein_coding|2/7|c.196-75T>C…	GT:AD:AF:DP:F1R2:F2R1:SB	0/0:17,0:0.052:17:7,0:10,0:0,17,0,0	0/1:10,4:0.313:14:4,1:5,3:0,10,0,4	RY1114T6	chr1_85099723_A>G	17	0	10	4	upstream_gene_variant	MODIFIER	Gm10553	PASS	snv	A>G	A:T>G:C	1	.
chr1	85100322	.	G	A	.	map_qual;normal_artifact;strand_bias;weak_evidence	AS_FilterStatus=weak_evidence,map_qual,strand_bias;AS_SB_TABLE=135,97|15,0;DP=257;ECNT=1;GERMQ=93;MBQ=30,36;MFRL=149,172;MMQ=43,20;MPOS=15;NALOD=-1.438e+01;NLOD=5.60;POPAF=6.00;TLOD=3.49;ANN=A|synonymous_variant|LOW|Gm10553|ENSMUSG00000073631|transcript|ENSMUST00000097669|protein_coding|1/1|c.159G>A|p.Ser53Ser|159/372|159/372|53/123||,A|intron_variant|MODIFIER|A530032D15Rik|ENSMUSG00000089844|tra…	GT:AD:AF:DP:F1R2:F2R1:SB	0/0:139,10:0.088:149:53,5:84,5:84,55,10,0	0/1:93,5:0.069:98:55,2:38,3:51,42,5,0	RY1114T6	chr1_85100322_G>A	139	10	93	5	synonymous_variant	LOW	Gm10553	.	snv	G>A	G:C>A:T	3	.
chr1	85112557	.	T	C	.	normal_artifact	AS_FilterStatus=SITE;AS_SB_TABLE=107,243|10,23;DP=397;ECNT=1;GERMQ=93;MBQ=34,36;MFRL=154,150;MMQ=40,40;MPOS=23;NALOD=-2.224e+01;NLOD=6.88;POPAF=6.00;TLOD=43.64;ANN=C|upstream_gene_variant|MODIFIER|A530032D15Rik|ENSMUSG00000089844|transcript|ENSMUST00000161724|protein_coding||c.-3189A>G|||||3108|,C|upstream_gene_variant|MODIFIER|Gm16038|ENSMUSG00000090128|transcript|ENSMUST00000159317|unprocessed_…	GT:AD:AF:DP:F1R2:F2R1:SB	0/0:183,12:0.070:195:90,8:92,4:58,125,4,8	0/1:167,21:0.109:188:75,8:88,12:49,118,6,15	RY1114T6	chr1_85112557_T>C	183	12	167	21	upstream_gene_variant	MODIFIER	A530032D15Rik	.	snv	T>C	A:T>G:C	2	.
chr1	85113047	.	G	A	.	normal_artifact	AS_FilterStatus=SITE;AS_SB_TABLE=274,138|17,10;DP=450;ECNT=1;GERMQ=93;MBQ=34,36;MFRL=150,162;MMQ=60,60;MPOS=25;NALOD=-2.520e+01;NLOD=6.74;POPAF=6.00;TLOD=30.96;ANN=A|splice_region_variant&non_coding_transcript_exon_variant|LOW|A530040E14Rik|ENSMUSG00000072109|transcript|ENSMUST00000162353|antisense|4/4|n.1032G>A||||||,A|upstream_gene_variant|MODIFIER|A530032D15Rik|ENSMUSG00000089844|transcript|EN…	GT:AD:AF:DP:F1R2:F2R1:SB	0/0:206,14:0.066:220:130,9:76,5:128,78,7,7	0/1:206,13:0.074:219:119,9:84,4:146,60,10,3	RY1114T6	chr1_85113047_G>A	206	14	206	13	splice_region_variant&non_coding_transcript_exon_variant	LOW	A530040E14Rik	.	snv	G>A	G:C>A:T	2	.
chr1	85113254	.	C	T	.	normal_artifact	AS_FilterStatus=SITE;AS_SB_TABLE=0,75|0,13;DP=94;ECNT=2;GERMQ=64;MBQ=37,36;MFRL=205,225;MMQ=22,40;MPOS=22;NALOD=-3.242e+00;NLOD=3.16;POPAF=6.00;TLOD=24.67;ANN=T|upstream_gene_variant|MODIFIER|A530032D15Rik|ENSMUSG00000089844|transcript|ENSMUST00000161724|protein_coding||c.-3886G>A|||||3805|,T|upstream_gene_variant|MODIFIER|Gm16038|ENSMUSG00000090128|transcript|ENSMUST00000159317|unprocessed_pseud…	GT:AD:AF:DP:F1R2:F2R1:SB	0/0:34,2:0.077:36:12,1:22,1:0,34,0,2	0/1:41,11:0.222:52:17,7:24,4:0,41,0,11	RY1114T6	chr1_85113254_C>T	34	2	41	11	upstream_gene_variant	MODIFIER	A530032D15Rik	.	snv	C>T	G:C>A:T	2	.
chr1	85113274	.	C	T	.	map_qual;weak_evidence	AS_FilterStatus=weak_evidence,map_qual;AS_SB_TABLE=0,54|0,3;DP=61;ECNT=2;GERMQ=93;MBQ=37,36;MFRL=224,221;MMQ=22,28;MPOS=3;NALOD=1.37;NLOD=6.30;POPAF=6.00;TLOD=3.75;ANN=T|upstream_gene_variant|MODIFIER|A530032D15Rik|ENSMUSG00000089844|transcript|ENSMUST00000161724|protein_coding||c.-3906G>A|||||3825|,T|upstream_gene_variant|MODIFIER|Gm16038|ENSMUSG00000090128|transcript|ENSMUST00000159317|unproces…	GT:AD:AF:DP:F1R2:F2R1:SB	0/0:21,0:0.041:21:7,0:14,0:0,21,0,0	0/1:33,3:0.104:36:13,2:19,1:0,33,0,3	RY1114T6	chr1_85113274_C>T	21	0	33	3	upstream_gene_variant	MODIFIER	A530032D15Rik	PASS	snv	C>T	G:C>A:T	1	.
chr1	85164010	.	C	A	.	map_qual;normal_artifact;weak_evidence	AS_FilterStatus=weak_evidence,map_qual;AS_SB_TABLE=12,31|0,4;DP=50;ECNT=1;GERMQ=65;MBQ=36,35;MFRL=180,187;MMQ=23,22;MPOS=41;NALOD=-1.554e-01;NLOD=2.69;POPAF=6.00;TLOD=3.25;ANN=A|intron_variant|MODIFIER|Gm6264|ENSMUSG00000089716|transcript|ENSMUST00000162896|transcribed_unprocessed_pseudogene|2/12|n.147+37C>A||||||,A|intragenic_variant|MODIFIER|C130026I21Rik|ENSMUSG00000052477|gene_variant|ENSMUSG…	GT:AD:AF:DP:F1R2:F2R1:SB	0/0:19,1:0.099:20:10,0:8,1:6,13,0,1	0/1:24,3:0.146:27:10,2:14,1:6,18,0,3	RY1114T6	chr1_85164010_C>A	19	1	24	3	intron_variant	MODIFIER	Gm6264	.	snv	C>A	G:C>T:A	1	.
chr1	85185588	.	C	A	.	clustered_events;map_qual	AS_FilterStatus=map_qual;AS_SB_TABLE=73,57|2,2;DP=137;ECNT=5;GERMQ=93;MBQ=20,20;MFRL=145,113;MMQ=40,25;MPOS=39;NALOD=1.71;NLOD=14.75;POPAF=6.00;TLOD=5.17;ANN=A|intragenic_variant|MODIFIER|C130026I21Rik|ENSMUSG00000052477|gene_variant|ENSMUSG00000052477|||n.85185588G>T||||||,A|non_coding_transcript_exon_variant|MODIFIER|Gm6264|ENSMUSG00000089716|transcript|ENSMUST00000162896|transcribed_unprocesse…	GT:AD:AF:DP:F1R2:F2R1:SB	0/0:68,0:0.019:68:25,0:42,0:38,30,0,0	0/1:62,4:0.065:66:25,2:37,2:35,27,2,2	RY1114T6	chr1_85185588_C>A	68	0	62	4	intragenic_variant	MODIFIER	C130026I21Rik	PASS	snv	C>A	G:C>T:A	2	.
chr1	85185604	.	A	G	.	clustered_events;map_qual	AS_FilterStatus=map_qual;AS_SB_TABLE=62,74|2,2;DP=145;ECNT=5;GERMQ=93;MBQ=20,20;MFRL=148,113;MMQ=29,25;MPOS=23;NALOD=1.72;NLOD=15.65;POPAF=6.00;TLOD=5.13;ANN=G|splice_region_variant&non_coding_transcript_exon_variant|LOW|Gm6264|ENSMUSG00000089716|transcript|ENSMUST00000162896|transcribed_unprocessed_pseudogene|8/13|n.747A>G||||||,G|intragenic_variant|MODIFIER|C130026I21Rik|ENSMUSG00000052477|gene…	GT:AD:AF:DP:F1R2:F2R1:SB	0/0:72,0:0.019:72:30,0:42,0:32,40,0,0	0/1:64,4:0.065:68:27,2:37,2:30,34,2,2	RY1114T6	chr1_85185604_A>G	72	0	64	4	splice_region_variant&non_coding_transcript_exon_variant	LOW	Gm6264	PASS	snv	A>G	A:T>G:C	2	.
chr1	85185617	.	C	T	.	clustered_events;map_qual	AS_FilterStatus=map_qual;AS_SB_TABLE=53,82|2,2;DP=143;ECNT=5;GERMQ=93;MBQ=20,20;MFRL=150,113;MMQ=36,25;MPOS=10;NALOD=1.68;NLOD=13.84;POPAF=6.00;TLOD=5.24;ANN=T|intron_variant|MODIFIER|Gm6264|ENSMUSG00000089716|transcript|ENSMUST00000162896|transcribed_unprocessed_pseudogene|8/12|n.748+12C>T||||||,T|intragenic_variant|MODIFIER|C130026I21Rik|ENSMUSG00000052477|gene_variant|ENSMUSG00000052477|||n.85…	GT:AD:AF:DP:F1R2:F2R1:SB	0/0:69,0:0.020:69:31,0:38,0:26,43,0,0	0/1:66,4:0.066:70:29,2:37,2:27,39,2,2	RY1114T6	chr1_85185617_C>T	69	0	66	4	intron_variant	MODIFIER	Gm6264	PASS	snv	C>T	G:C>A:T	2	.
chr1	85185638	rs579429583	T	C	.	clustered_events;map_qual;normal_artifact;weak_evidence	AS_FilterStatus=weak_evidence,map_qual;AS_SB_TABLE=26,58|1,3;ECNT=5;GERMQ=93;MBQ=20,29;MFRL=153,114;MMQ=40,24;MPOS=10;NALOD=-1.349e-01;NLOD=6.45;POPAF=6.00;TLOD=3.24;CSQ=C|ENSMUSG00000089716|ENSMUST00000162896|Transcript|intron_variant&non_coding_transcript_variant||||||||1,C|ENSMUSG00000052477|ENSMUST00000162421|Transcript|intron_variant||||||||-1,C|ENSMUSG00000052477|ENSMUST00000161267|Transcri…	GT:AD:AF:DP:F1R2:F2R1:SB	0/0:44,1:0.057:45:18,1:26,0:15,29,0,1	0/1:40,3:0.087:43:16,3:24,0:11,29,1,2	RY1114T6	chr1_85185638_T>C	44	1	40	3	intron_variant	MODIFIER	Gm6264	.	snv	T>C	A:T>G:C	2	.
chr1	85185668	.	T	C	.	clustered_events;map_qual;normal_artifact	AS_FilterStatus=map_qual;AS_SB_TABLE=5,40|2,4;DP=52;ECNT=5;GERMQ=45;MBQ=34,20;MFRL=157,130;MMQ=27,26;MPOS=32;NALOD=-2.065e+00;NLOD=2.85;POPAF=6.00;TLOD=6.77;ANN=C|intron_variant|MODIFIER|Gm6264|ENSMUSG00000089716|transcript|ENSMUST00000162896|transcribed_unprocessed_pseudogene|8/12|n.748+63T>C||||||,C|intragenic_variant|MODIFIER|C130026I21Rik|ENSMUSG00000052477|gene_variant|ENSMUSG00000052477|||n…	GT:AD:AF:DP:F1R2:F2R1:SB	0/0:27,2:0.071:29:11,2:15,0:3,24,1,1	0/1:18,4:0.189:22:8,3:10,1:2,16,1,3	RY1114T6	chr1_85185668_T>C	27	2	18	4	intron_variant	MODIFIER	Gm6264	.	snv	T>C	A:T>G:C	1	.
chr1	85199709	.	A	G	.	map_qual;normal_artifact	AS_FilterStatus=map_qual;AS_SB_TABLE=141,119|5,14;DP=285;ECNT=1;GERMQ=93;MBQ=20,36;MFRL=142,158;MMQ=48,24;MPOS=26;NALOD=-3.272e+00;NLOD=21.62;POPAF=6.00;TLOD=10.42;ANN=G|intragenic_variant|MODIFIER|C130026I21Rik|ENSMUSG00000052477|gene_variant|ENSMUSG00000052477|||n.85199709T>C||||||,G|non_coding_transcript_exon_variant|MODIFIER|Gm7609|ENSMUSG00000079457|transcript|ENSMUST00000113402|processed_tr…	GT:AD:AF:DP:F1R2:F2R1:SB	0/0:145,6:0.036:151:67,2:78,4:80,65,1,5	0/1:115,13:0.079:128:59,10:56,3:61,54,4,9	RY1114T6	chr1_85199709_A>G	145	6	115	13	intragenic_variant	MODIFIER	C130026I21Rik	.	snv	A>G	A:T>G:C	2	.
chr1	85257266	.	G	C	.	clustered_events;normal_artifact;weak_evidence	AS_FilterStatus=weak_evidence;AS_SB_TABLE=43,2|3,0;DP=49;ECNT=3;GERMQ=73;MBQ=30,36;MFRL=207,213;MMQ=36,36;MPOS=32;NALOD=-1.257e+00;NLOD=3.45;POPAF=6.00;TLOD=3.66;ANN=C|downstream_gene_variant|MODIFIER|Gm16028|ENSMUSG00000090252|transcript|ENSMUST00000162347|antisense||n.*1801G>C|||||1801|,C|intron_variant|MODIFIER|C130026I21Rik|ENSMUSG00000052477|transcript|ENSMUST00000093506|protein_coding|4/7|c…	GT:AD:AF:DP:F1R2:F2R1:SB	0/0:24,1:0.073:25:5,0:16,1:23,1,1,0	0/1:21,2:0.119:23:3,1:17,1:20,1,2,0	RY1114T6	chr1_85257266_G>C	24	1	21	2	downstream_gene_variant	MODIFIER	Gm16028	.	snv	G>C	G:C>C:G	1	.
chr1	85257385	.	C	T	.	clustered_events;normal_artifact;strand_bias	AS_FilterStatus=strand_bias;AS_SB_TABLE=237,66|2,14;DP=323;ECNT=3;GERMQ=93;MBQ=36,36;MFRL=167,195;MMQ=25,35;MPOS=35;NALOD=-1.714e+01;NLOD=16.41;POPAF=6.00;TLOD=12.41;ANN=T|splice_donor_variant&intron_variant|HIGH|C130026I21Rik|ENSMUSG00000052477|transcript|ENSMUST00000093506|protein_coding|4/7|c.451+1G>A||||||,T|downstream_gene_variant|MODIFIER|Gm16028|ENSMUSG00000090252|transcript|ENSMUST0000016…	GT:AD:AF:DP:F1R2:F2R1:SB	0/0:164,9:0.059:173:52,1:109,8:131,33,1,8	0/1:139,7:0.050:146:41,0:97,7:106,33,1,6	RY1114T6	chr1_85257385_C>T	164	9	139	7	splice_donor_variant&intron_variant	HIGH	C130026I21Rik	.	snv	C>T	G:C>A:T	4	.
chr1	85257513	.	C	T	.	map_qual;normal_artifact	AS_FilterStatus=map_qual;AS_SB_TABLE=1,99|0,11;DP=126;ECNT=1;GERMQ=93;MBQ=37,34;MFRL=180,188;MMQ=22,21;MPOS=30;NALOD=-3.015e+00;NLOD=9.41;POPAF=6.00;TLOD=8.58;ANN=T|downstream_gene_variant|MODIFIER|Gm16028|ENSMUSG00000090252|transcript|ENSMUST00000162347|antisense||n.*2048C>T|||||2048|,T|intron_variant|MODIFIER|C130026I21Rik|ENSMUSG00000052477|transcript|ENSMUST00000093506|protein_coding|3/7|c.36…	GT:AD:AF:DP:F1R2:F2R1:SB	0/0:63,4:0.070:67:21,2:42,2:1,62,0,4	0/1:37,7:0.171:44:12,2:25,5:0,37,0,7	RY1114T6	chr1_85257513_C>T	63	4	37	7	downstream_gene_variant	MODIFIER	Gm16028	.	snv	C>T	G:C>A:T	3	.
chr1	85259925	.	C	G	.	map_qual;normal_artifact	AS_FilterStatus=map_qual;AS_SB_TABLE=12,128|1,8;DP=152;ECNT=2;GERMQ=93;MBQ=38,37;MFRL=185,185;MMQ=22,23;MPOS=26;NALOD=-6.050e+00;NLOD=5.27;POPAF=6.00;TLOD=6.34;ANN=G|downstream_gene_variant|MODIFIER|Gm16028|ENSMUSG00000090252|transcript|ENSMUST00000162347|antisense||n.*4460C>G|||||4460|,G|intron_variant|MODIFIER|C130026I21Rik|ENSMUSG00000052477|transcript|ENSMUST00000093506|protein_coding|2/7|c.1…	GT:AD:AF:DP:F1R2:F2R1:SB	0/0:60,4:0.076:64:37,1:22,3:2,58,0,4	0/1:80,5:0.064:85:42,1:37,4:10,70,1,4	RY1114T6	chr1_85259925_C>G	60	4	80	5	downstream_gene_variant	MODIFIER	Gm16028	.	snv	C>G	G:C>C:G	2	.
chr1	85259981	.	C	T	.	normal_artifact;weak_evidence	AS_FilterStatus=weak_evidence;AS_SB_TABLE=0,66|0,3;DP=73;ECNT=2;GERMQ=93;MBQ=31,36;MFRL=196,211;MMQ=22,34;MPOS=8;NALOD=0.164;NLOD=5.10;POPAF=6.00;TLOD=3.44;ANN=T|downstream_gene_variant|MODIFIER|Gm16028|ENSMUSG00000090252|transcript|ENSMUST00000162347|antisense||n.*4516C>T|||||4516|,T|intron_variant|MODIFIER|C130026I21Rik|ENSMUSG00000052477|transcript|ENSMUST00000093506|protein_coding|2/7|c.196-1…	GT:AD:AF:DP:F1R2:F2R1:SB	0/0:25,1:0.070:26:11,1:13,0:0,25,0,1	0/1:41,2:0.066:43:20,2:19,0:0,41,0,2	RY1114T6	chr1_85259981_C>T	25	1	41	2	downstream_gene_variant	MODIFIER	Gm16028	.	snv	C>T	G:C>A:T	1	.
chr1	85340888	.	C	T	.	map_qual;weak_evidence	AS_FilterStatus=weak_evidence,map_qual;AS_SB_TABLE=31,22|1,2;DP=56;ECNT=1;GERMQ=93;MBQ=20,20;MFRL=168,155;MMQ=24,24;MPOS=12;NALOD=1.23;NLOD=4.81;POPAF=6.00;TLOD=3.93;ANN=T|splice_region_variant&intron_variant|LOW|Gm7281|ENSMUSG00000089937|transcript|ENSMUST00000160010|unprocessed_pseudogene|2/4|n.223-4G>A||||||,T|non_coding_transcript_exon_variant|MODIFIER|Gm16025|ENSMUSG00000089652|transcript|EN…	GT:AD:AF:DP:F1R2:F2R1:SB	0/0:23,0:0.056:23:7,0:15,0:14,9,0,0	0/1:30,3:0.111:33:17,1:13,2:17,13,1,2	RY1114T6	chr1_85340888_C>T	23	0	30	3	splice_region_variant&intron_variant	LOW	Gm7281	PASS	snv	C>T	G:C>A:T	1	.
chr1	85448322	.	A	G	.	normal_artifact;strand_bias	AS_FilterStatus=strand_bias;AS_SB_TABLE=238,125|8,0;ECNT=1;GERMQ=93;MBQ=20,38;MFRL=144,196;MMQ=47,37;MPOS=26;NALOD=-1.554e+00;NLOD=33.27;POPAF=6.00;TLOD=11.94;CSQ=G||||intergenic_variant||||||||;DP=28;DP4=0,1,27,0;ANN=G|intergenic_region|MODIFIER|Gm16025-Gm2666|ENSMUSG00000089652-ENSMUSG00000096292|intergenic_region|ENSMUSG00000089652-ENSMUSG00000096292|||n.85448322A>G||||||	GT:AD:AF:DP:F1R2:F2R1:SB	0/0:189,2:0.021:191:133,1:56,1:127,62,2,0	0/1:174,6:0.054:180:128,4:46,2:111,63,6,0	RY1114T6	chr1_85448322_A>G	189	2	174	6	intergenic_region	MODIFIER	Gm16025-Gm2666	.	snv	A>G	A:T>G:C	4	.
chr1	85484456	.	C	T	.	map_qual;normal_artifact	AS_FilterStatus=map_qual;AS_SB_TABLE=5,350|0,17;DP=389;ECNT=1;GERMQ=93;MBQ=37,35;MFRL=154,192;MMQ=22,22;MPOS=35;NALOD=-6.905e+00;NLOD=38.96;POPAF=6.00;TLOD=6.74;ANN=T|non_coding_transcript_exon_variant|MODIFIER|Gm2666|ENSMUSG00000096292|transcript|ENSMUST00000160587|processed_pseudogene|1/1|n.687G>A||||||	GT:AD:AF:DP:F1R2:F2R1:SB	0/0:205,9:0.045:214:114,4:91,5:3,202,0,9	0/1:150,8:0.055:158:99,7:50,1:2,148,0,8	RY1114T6	chr1_85484456_C>T	205	9	150	8	non_coding_transcript_exon_variant	MODIFIER	Gm2666	.	snv	C>T	G:C>A:T	4	.
chr1	85484791	.	C	T	.	map_qual;normal_artifact	AS_FilterStatus=map_qual;AS_SB_TABLE=78,100|14,3;DP=204;ECNT=1;GERMQ=93;MBQ=20,34;MFRL=146,213;MMQ=22,21;MPOS=25;NALOD=-7.014e+00;NLOD=4.38;POPAF=6.00;TLOD=12.37;ANN=T|non_coding_transcript_exon_variant|MODIFIER|Gm2666|ENSMUSG00000096292|transcript|ENSMUST00000160587|processed_pseudogene|1/1|n.352G>A||||||	GT:AD:AF:DP:F1R2:F2R1:SB	0/0:96,7:0.102:103:58,5:37,2:43,53,7,0	0/1:82,10:0.148:92:50,6:31,4:35,47,7,3	RY1114T6	chr1_85484791_C>T	96	7	82	10	non_coding_transcript_exon_variant	MODIFIER	Gm2666	.	snv	C>T	G:C>A:T	2	.
chr1	85485216	.	C	T	.	map_qual;normal_artifact;strand_bias	AS_FilterStatus=map_qual,strand_bias;AS_SB_TABLE=66,98|0,5;DP=179;ECNT=2;GERMQ=93;MBQ=20,37;MFRL=143,223;MMQ=36,23;MPOS=35;NALOD=0.703;NLOD=15.78;POPAF=6.00;TLOD=5.12;ANN=T|upstream_gene_variant|MODIFIER|Gm2666|ENSMUSG00000096292|transcript|ENSMUST00000160587|processed_pseudogene||n.-74G>A|||||74|,T|intergenic_region|MODIFIER|Gm2666-Gm16092|ENSMUSG00000096292-ENSMUSG00000089714|intergenic_region|…	GT:AD:AF:DP:F1R2:F2R1:SB	0/0:94,1:0.030:95:48,0:46,1:38,56,0,1	0/1:70,4:0.097:74:39,3:31,1:28,42,0,4	RY1114T6	chr1_85485216_C>T	94	1	70	4	upstream_gene_variant	MODIFIER	Gm2666	.	snv	C>T	G:C>A:T	1	.
chr1	85485305	.	T	C	.	map_qual;weak_evidence	AS_FilterStatus=weak_evidence,map_qual;AS_SB_TABLE=0,13|0,2;DP=15;ECNT=2;GERMQ=22;MBQ=36,38;MFRL=158,160;MMQ=23,23;MPOS=22;NALOD=0.954;NLOD=2.40;POPAF=6.00;TLOD=3.23;ANN=C|upstream_gene_variant|MODIFIER|Gm2666|ENSMUSG00000096292|transcript|ENSMUST00000160587|processed_pseudogene||n.-163A>G|||||163|,C|intergenic_region|MODIFIER|Gm2666-Gm16092|ENSMUSG00000096292-ENSMUSG00000089714|intergenic_region…	GT:AD:AF:DP:F1R2:F2R1:SB	0/0:8,0:0.100:8:7,0:1,0:0,8,0,0	0/1:5,2:0.333:7:3,2:2,0:0,5,0,2	RY1114T6	chr1_85485305_T>C	8	0	5	2	upstream_gene_variant	MODIFIER	Gm2666	.	snv	T>C	A:T>G:C	1	.
chr1	85496294	.	C	T	.	map_qual;normal_artifact;strand_bias	AS_FilterStatus=map_qual,strand_bias;AS_SB_TABLE=93,78|0,8;DP=183;ECNT=1;GERMQ=93;MBQ=20,35;MFRL=155,208;MMQ=22,23;MPOS=21;NALOD=-2.204e-01;NLOD=17.86;POPAF=6.00;TLOD=7.66;ANN=T|intergenic_region|MODIFIER|Gm2666-Gm16092|ENSMUSG00000096292-ENSMUSG00000089714|intergenic_region|ENSMUSG00000096292-ENSMUSG00000089714|||n.85496294C>T||||||	GT:AD:AF:DP:F1R2:F2R1:SB	0/0:110,2:0.036:112:43,1:64,1:63,47,0,2	0/1:61,6:0.141:67:37,4:24,2:30,31,0,6	RY1114T6	chr1_85496294_C>T	110	2	61	6	intergenic_region	MODIFIER	Gm2666-Gm16092	.	snv	C>T	G:C>A:T	2	.
chr1	85496460	.	T	C	.	weak_evidence	AS_FilterStatus=weak_evidence;AS_SB_TABLE=2,14|1,1;DP=19;ECNT=1;GERMQ=28;MBQ=36,20;MFRL=178,161;MMQ=60,60;MPOS=20;NALOD=1.000;NLOD=2.71;POPAF=6.00;TLOD=3.27;ANN=C|intergenic_region|MODIFIER|Gm2666-Gm16092|ENSMUSG00000096292-ENSMUSG00000089714|intergenic_region|ENSMUSG00000096292-ENSMUSG00000089714|||n.85496460T>C||||||	GT:AD:AF:DP:F1R2:F2R1:SB	0/0:10,0:0.091:10:4,0:6,0:1,9,0,0	0/1:6,2:0.246:8:3,2:3,0:1,5,1,1	RY1114T6	chr1_85496460_T>C	10	0	6	2	intergenic_region	MODIFIER	Gm2666-Gm16092	.	snv	T>C	A:T>G:C	1	.
chr1	85513098	.	C	T	.	map_qual;normal_artifact;strand_bias	AS_FilterStatus=map_qual,strand_bias;AS_SB_TABLE=78,38|10,0;DP=138;ECNT=1;GERMQ=93;MBQ=36,35;MFRL=151,150;MMQ=42,25;MPOS=35;NALOD=-6.137e+00;NLOD=2.62;POPAF=6.00;TLOD=8.65;ANN=T|non_coding_transcript_exon_variant|MODIFIER|Gm16092|ENSMUSG00000089714|transcript|ENSMUST00000161449|lincRNA|2/2|n.440G>A||||||	GT:AD:AF:DP:F1R2:F2R1:SB	0/0:64,4:0.090:68:19,3:45,1:42,22,4,0	0/1:52,6:0.133:58:13,3:39,3:36,16,6,0	RY1114T6	chr1_85513098_C>T	64	4	52	6	non_coding_transcript_exon_variant	MODIFIER	Gm16092	.	snv	C>T	G:C>A:T	3	.
chr1	85549714	.	G	T	.	clustered_events;map_qual;normal_artifact;weak_evidence	AS_FilterStatus=weak_evidence,map_qual;AS_SB_TABLE=139,83|9,2;DP=245;ECNT=3;GERMQ=93;MBQ=28,36;MFRL=173,191;MMQ=22,21;MPOS=30;NALOD=-4.589e+00;NLOD=14.20;POPAF=6.00;TLOD=4.41;ANN=T|non_coding_transcript_exon_variant|MODIFIER|Gm7592|ENSMUSG00000090186|transcript|ENSMUST00000159601|transcribed_unprocessed_pseudogene|3/3|n.334G>T||||||	GT:AD:AF:DP:F1R2:F2R1:SB	0/0:124,6:0.067:130:67,2:56,4:74,50,5,1	0/1:98,5:0.058:103:47,3:50,2:65,33,4,1	RY1114T6	chr1_85549714_G>T	124	6	98	5	non_coding_transcript_exon_variant	MODIFIER	Gm7592	.	snv	G>T	G:C>T:A	2	.
chr1	85549728	.	G	A	.	clustered_events;map_qual;normal_artifact	AS_FilterStatus=map_qual;AS_SB_TABLE=68,82|14,4;DP=170;ECNT=3;GERMQ=93;MBQ=37,35;MFRL=183,182;MMQ=22,22;MPOS=39;NALOD=-1.027e+01;NLOD=3.24;POPAF=6.00;TLOD=10.83;ANN=A|non_coding_transcript_exon_variant|MODIFIER|Gm7592|ENSMUSG00000090186|transcript|ENSMUST00000159601|transcribed_unprocessed_pseudogene|3/3|n.348G>A||||||	GT:AD:AF:DP:F1R2:F2R1:SB	0/0:82,9:0.106:91:43,2:39,7:33,49,7,2	0/1:68,9:0.125:77:32,5:36,4:35,33,7,2	RY1114T6	chr1_85549728_G>A	82	9	68	9	non_coding_transcript_exon_variant	MODIFIER	Gm7592	.	snv	G>A	G:C>A:T	2	.
chr1	85549768	.	G	T	.	clustered_events;map_qual;normal_artifact	AS_FilterStatus=map_qual;AS_SB_TABLE=48,84|5,9;DP=148;ECNT=3;GERMQ=93;MBQ=36,30;MFRL=186,192;MMQ=22,22;MPOS=13;NALOD=-7.116e+00;NLOD=2.40;POPAF=6.00;TLOD=10.42;ANN=T|non_coding_transcript_exon_variant|MODIFIER|Gm7592|ENSMUSG00000090186|transcript|ENSMUST00000159601|transcribed_unprocessed_pseudogene|3/3|n.388G>T||||||	GT:AD:AF:DP:F1R2:F2R1:SB	0/0:68,6:0.095:74:30,2:38,4:23,45,2,4	0/1:64,8:0.113:72:30,4:34,4:25,39,3,5	RY1114T6	chr1_85549768_G>T	68	6	64	8	non_coding_transcript_exon_variant	MODIFIER	Gm7592	.	snv	G>T	G:C>T:A	2	.
chr1	85550739	.	T	A	.	map_qual;weak_evidence	AS_FilterStatus=weak_evidence,map_qual;AS_SB_TABLE=2,11|0,2;DP=20;ECNT=1;GERMQ=20;MBQ=34,36;MFRL=207,244;MMQ=24,24;MPOS=6;NALOD=0.770;NLOD=2.40;POPAF=6.00;TLOD=3.69;ANN=A|non_coding_transcript_exon_variant|MODIFIER|Gm7592|ENSMUSG00000090186|transcript|ENSMUST00000159601|transcribed_unprocessed_pseudogene|3/3|n.1359T>A||||||	GT:AD:AF:DP:F1R2:F2R1:SB	0/0:9,0:0.091:9:3,0:6,0:1,8,0,0	0/1:4,2:0.372:6:3,0:1,2:1,3,0,2	RY1114T6	chr1_85550739_T>A	9	0	4	2	non_coding_transcript_exon_variant	MODIFIER	Gm7592	.	snv	T>A	A:T>T:A	1	.
chr1	85589192	.	C	A	.	map_qual;normal_artifact;strand_bias;weak_evidence	AS_FilterStatus=weak_evidence,map_qual,strand_bias;AS_SB_TABLE=20,36|0,4;DP=63;ECNT=1;GERMQ=93;MBQ=20,36;MFRL=169,213;MMQ=40,22;MPOS=11;NALOD=-1.334e-02;NLOD=3.64;POPAF=6.00;TLOD=3.34;ANN=A|splice_acceptor_variant&intron_variant|HIGH|Sp110|ENSMUSG00000070034|transcript|ENSMUST00000093508|protein_coding|4/11|c.584-1G>T||||||;LOF=(Sp110|ENSMUSG00000070034|1|1.00)	GT:AD:AF:DP:F1R2:F2R1:SB	0/0:24,1:0.085:25:12,1:12,0:9,15,0,1	0/1:32,3:0.146:35:16,2:15,1:11,21,0,3	RY1114T6	chr1_85589192_C>A	24	1	32	3	splice_acceptor_variant&intron_variant	HIGH	Sp110	.	snv	C>A	G:C>T:A	2	.
chr1	85595877	.	C	A	.	map_qual;weak_evidence	AS_FilterStatus=weak_evidence,map_qual;AS_SB_TABLE=26,1|2,0;DP=30;ECNT=1;GERMQ=59;MBQ=36,36;MFRL=183,257;MMQ=22,21;MPOS=40;NALOD=1.11;NLOD=3.60;POPAF=6.00;TLOD=3.57;ANN=A|upstream_gene_variant|MODIFIER|Gm16094|ENSMUSG00000090103|transcript|ENSMUST00000162784|antisense||n.-3409C>A|||||3409|,A|upstream_gene_variant|MODIFIER|Sp140|ENSMUSG00000070031|transcript|ENSMUST00000080204|protein_coding||c.-5…	GT:AD:AF:DP:F1R2:F2R1:SB	0/0:12,0:0.072:12:5,0:6,0:12,0,0,0	0/1:15,2:0.155:17:8,0:7,2:14,1,2,0	RY1114T6	chr1_85595877_C>A	12	0	15	2	upstream_gene_variant	MODIFIER	Gm16094	.	snv	C>A	G:C>T:A	2	.
chr1	85601172	.	T	G	.	clustered_events;normal_artifact;strand_bias;weak_evidence	AS_FilterStatus=weak_evidence,strand_bias;AS_SB_TABLE=434,344|18,0;DP=823;ECNT=4;GERMQ=93;MBQ=20,31;MFRL=142,187;MMQ=60,31;MPOS=15;NALOD=-1.402e-01;NLOD=72.57;POPAF=6.00;TLOD=5.00;ANN=G|missense_variant|MODERATE|Sp140|ENSMUSG00000070031|transcript|ENSMUST00000080204|protein_coding|1/17|c.13T>G|p.Tyr5Asp|470/2417|13/1605|5/534||,G|upstream_gene_variant|MODIFIER|Sp110|ENSMUSG00000070034|transcript|…	GT:AD:AF:DP:F1R2:F2R1:SB	0/0:399,9:0.014:408:212,3:181,4:230,169,9,0	0/1:379,9:0.025:388:194,6:182,3:204,175,9,0	RY1114T6	chr1_85601172_T>G	399	9	379	9	missense_variant	MODERATE	Sp140	.	snv	T>G	A:T>C:G	3	.
chr1	85601295	.	AGT	A	.	clustered_events;haplotype;map_qual;normal_artifact;strand_bias;weak_evidence	AS_FilterStatus=weak_evidence,map_qual,strand_bias;AS_SB_TABLE=37,176|0,5;DP=232;ECNT=4;GERMQ=93;MBQ=36,38;MFRL=165,164;MMQ=33,23;MPOS=45;NALOD=-3.269e+00;NLOD=21.66;POPAF=6.00;TLOD=6.48;ANN=A|upstream_gene_variant|MODIFIER|Sp110|ENSMUSG00000070034|transcript|ENSMUST00000093508|protein_coding||c.-2670_-2669delAC|||||2479|,A|downstream_gene_variant|MODIFIER|Gm16094|ENSMUSG00000090103|transcript|EN…	GT:AD:AF:DP:F1R2:F2R1:PGT:PID:PS:SB	0|0:116,2:0.029:118:64,2:48,0:0|1:85601295_AGT_A:85601295:22,94,0,2	0|1:97,3:0.044:100:68,1:28,2:0|1:85601295_AGT_A:85601295:15,82,0,3	RY1114T6	chr1_85601295_AGT>A	116	2	97	3	upstream_gene_variant	MODIFIER	Sp110	.	indel	.	.	2	.
chr1	85601299	.	A	ATT	.	clustered_events;haplotype;map_qual;normal_artifact;strand_bias;weak_evidence	AS_FilterStatus=weak_evidence,map_qual,strand_bias;AS_SB_TABLE=36,176|0,5;DP=217;ECNT=4;GERMQ=93;MBQ=34,34;MFRL=165,164;MMQ=32,23;MPOS=43;NALOD=-3.287e+00;NLOD=21.40;POPAF=6.00;RPA=1,3;RU=T;STR;STRQ=93;TLOD=6.50;ANN=ATT|upstream_gene_variant|MODIFIER|Sp110|ENSMUSG00000070034|transcript|ENSMUST00000093508|protein_coding||c.-2673_-2672insAA|||||2483|,ATT|downstream_gene_variant|MODIFIER|Gm16094|ENS…	GT:AD:AF:DP:F1R2:F2R1:PGT:PID:PS:SB	0|0:115,2:0.029:117:63,2:47,0:0|1:85601295_AGT_A:85601295:21,94,0,2	0|1:97,3:0.044:100:63,1:27,2:0|1:85601295_AGT_A:85601295:15,82,0,3	RY1114T6	chr1_85601299_A>ATT	115	2	97	3	upstream_gene_variant	MODIFIER	Sp110	.	indel	.	.	2	.
chr1	85601352	.	C	T	.	clustered_events;map_qual;normal_artifact;weak_evidence	AS_FilterStatus=weak_evidence,map_qual;AS_SB_TABLE=2,56|1,4;DP=65;ECNT=4;GERMQ=93;MBQ=36,35;MFRL=180,151;MMQ=24,24;MPOS=11;NALOD=0.226;NLOD=7.58;POPAF=6.00;TLOD=4.76;ANN=T|upstream_gene_variant|MODIFIER|Sp110|ENSMUSG00000070034|transcript|ENSMUST00000093508|protein_coding||c.-2725G>A|||||2535|,T|downstream_gene_variant|MODIFIER|Gm16094|ENSMUSG00000090103|transcript|ENSMUST00000162784|antisense||n…	GT:AD:AF:DP:F1R2:F2R1:SB	0/0:35,2:0.053:37:16,0:19,2:2,33,0,2	0/1:23,3:0.104:26:17,3:5,0:0,23,1,2	RY1114T6	chr1_85601352_C>T	35	2	23	3	upstream_gene_variant	MODIFIER	Sp110	.	snv	C>T	G:C>A:T	3	.
chr1	85610664	.	T	C	.	haplotype;map_qual;normal_artifact	AS_FilterStatus=map_qual;AS_SB_TABLE=174,6|13,0;DP=207;ECNT=2;GERMQ=93;MBQ=34,35;MFRL=170,174;MMQ=22,22;MPOS=9;NALOD=-5.172e+00;NLOD=14.39;POPAF=6.00;TLOD=7.69;ANN=C|intron_variant|MODIFIER|Sp140|ENSMUSG00000070031|transcript|ENSMUST00000080204|protein_coding|2/16|c.196-75T>C||||||,C|intron_variant|MODIFIER|Gm10552|ENSMUSG00000073628|transcript|ENSMUST00000161763|antisense|1/2|n.251-362A>G||||||	GT:AD:AF:DP:F1R2:F2R1:PGT:PID:PS:SB	0|0:98,6:0.065:104:55,2:42,4:0|1:85610664_T_C:85610664:95,3,6,0	0|1:82,7:0.089:89:47,5:35,2:0|1:85610664_T_C:85610664:79,3,7,0	RY1114T6	chr1_85610664_T>C	98	6	82	7	intron_variant	MODIFIER	Sp140	.	snv	T>C	A:T>G:C	1	.
chr1	85610672	.	G	C	.	haplotype;map_qual;normal_artifact	AS_FilterStatus=map_qual;AS_SB_TABLE=243,6|14,0;DP=286;ECNT=2;GERMQ=93;MBQ=37,36;MFRL=165,164;MMQ=22,22;MPOS=13;NALOD=-5.713e+00;NLOD=20.82;POPAF=6.00;TLOD=6.07;ANN=C|intron_variant|MODIFIER|Sp140|ENSMUSG00000070031|transcript|ENSMUST00000080204|protein_coding|2/16|c.196-67G>C||||||,C|intron_variant|MODIFIER|Gm10552|ENSMUSG00000073628|transcript|ENSMUST00000161763|antisense|1/2|n.251-370C>G||||||	GT:AD:AF:DP:F1R2:F2R1:PGT:PID:PS:SB	0|0:127,7:0.058:134:72,4:55,3:1|0:85610664_T_C:85610664:124,3,7,0	1|0:122,7:0.061:129:71,4:51,3:1|0:85610664_T_C:85610664:119,3,7,0	RY1114T6	chr1_85610672_G>C	127	7	122	7	intron_variant	MODIFIER	Sp140	.	snv	G>C	G:C>C:G	3	.
chr1	85610753	.	A	C	.	clustered_events;map_qual;normal_artifact	AS_FilterStatus=map_qual;AS_SB_TABLE=759,622|40,35;DP=1486;ECNT=4;GERMQ=93;MBQ=20,20;MFRL=142,141;MMQ=24,23;MPOS=26;NALOD=-4.686e+01;NLOD=66.87;POPAF=6.00;TLOD=71.00;ANN=C|synonymous_variant|LOW|Sp140|ENSMUSG00000070031|transcript|ENSMUST00000080204|protein_coding|3/17|c.210A>C|p.Thr70Thr|667/2417|210/1605|70/534||,C|intron_variant|MODIFIER|Gm10552|ENSMUSG00000073628|transcript|ENSMUST00000161763…	GT:AD:AF:DP:F1R2:F2R1:SB	0/0:759,33:0.038:792:417,14:339,19:418,341,17,16	0/1:622,42:0.063:664:317,35:301,7:341,281,23,19	RY1114T6	chr1_85610753_A>C	759	33	622	42	synonymous_variant	LOW	Sp140	.	snv	A>C	A:T>C:G	4	.
chr1	85610774	.	GGA	G	.	clustered_events;normal_artifact	AS_FilterStatus=SITE;AS_SB_TABLE=605,772|34,60;DP=1562;ECNT=4;GERMQ=93;MBQ=20,20;MFRL=140,143;MMQ=34,41;MPOS=31;NALOD=-6.956e+01;NLOD=38.28;POPAF=6.00;RPA=3,2;RU=GA;STR;STRQ=93;TLOD=88.65;ANN=G|frameshift_variant|HIGH|Sp140|ENSMUSG00000070031|transcript|ENSMUST00000080204|protein_coding|3/17|c.237_238delAG|p.Arg79fs|694/2417|237/1605|79/534||INFO_REALIGN_3_PRIME,G|intron_variant|MODIFIER|Gm10552|…	GT:AD:AF:DP:F1R2:F2R1:SB	0/0:760,41:0.054:801:405,19:345,21:331,429,14,27	0/1:617,53:0.076:670:328,28:279,24:274,343,20,33	RY1114T6	chr1_85610774_GGA>G	760	41	617	53	frameshift_variant	HIGH	Sp140	.	indel	.	.	4	.
chr1	85610791	.	A	G	.	clustered_events;map_qual;normal_artifact	AS_FilterStatus=map_qual;AS_SB_TABLE=544,820|18,43;DP=1446;ECNT=4;GERMQ=93;MBQ=20,20;MFRL=141,138;MMQ=40,24;MPOS=26;NALOD=-3.555e+01;NLOD=85.62;POPAF=6.00;TLOD=37.94;ANN=G|missense_variant|MODERATE|Sp140|ENSMUSG00000070031|transcript|ENSMUST00000080204|protein_coding|3/17|c.248A>G|p.Asp83Gly|705/2417|248/1605|83/534||,G|intron_variant|MODIFIER|Gm10552|ENSMUSG00000073628|transcript|ENSMUST00000161…	GT:AD:AF:DP:F1R2:F2R1:SB	0/0:749,29:0.038:778:402,16:343,13:294,455,9,20	0/1:615,32:0.052:647:335,10:274,21:250,365,9,23	RY1114T6	chr1_85610791_A>G	749	29	615	32	missense_variant	MODERATE	Sp140	.	snv	A>G	A:T>G:C	4	.
chr1	85610873	.	C	T	.	clustered_events;normal_artifact;strand_bias;weak_evidence	AS_FilterStatus=weak_evidence,strand_bias;AS_SB_TABLE=62,167|9,0;DP=265;ECNT=4;GERMQ=93;MBQ=30,37;MFRL=166,161;MMQ=23,35;MPOS=32;NALOD=-9.009e+00;NLOD=11.72;POPAF=6.00;TLOD=4.66;ANN=T|synonymous_variant|LOW|Sp140|ENSMUSG00000070031|transcript|ENSMUST00000080204|protein_coding|3/17|c.330C>T|p.Pro110Pro|787/2417|330/1605|110/534||,T|intron_variant|MODIFIER|Gm10552|ENSMUSG00000073628|transcript|ENSM…	GT:AD:AF:DP:F1R2:F2R1:SB	0/0:116,5:0.057:121:64,5:52,0:33,83,5,0	0/1:113,4:0.049:117:67,4:45,0:29,84,4,0	RY1114T6	chr1_85610873_C>T	116	5	113	4	synonymous_variant	LOW	Sp140	.	snv	C>T	G:C>A:T	1	.
chr1	85615092	.	C	T	.	PASS	AS_FilterStatus=SITE;AS_SB_TABLE=26,4|1,3;DP=35;ECNT=1;GERMQ=53;MBQ=36,28;MFRL=167,140;MMQ=45,32;MPOS=15;NALOD=1.20;NLOD=4.52;POPAF=6.00;TLOD=12.76;ANN=T|upstream_gene_variant|MODIFIER|Gm10552|ENSMUSG00000073628|transcript|ENSMUST00000161763|antisense||n.-3196G>A|||||3196|,T|intron_variant|MODIFIER|Sp140|ENSMUSG00000070031|transcript|ENSMUST00000080204|protein_coding|4/16|c.419-96C>T||||||	GT:AD:AF:DP:F1R2:F2R1:SB	0/0:16,0:0.059:16:7,0:9,0:15,1,0,0	0/1:14,4:0.222:18:2,0:10,4:11,3,1,3	RY1114T6	chr1_85615092_C>T	16	0	14	4	upstream_gene_variant	MODIFIER	Gm10552	PASS	snv	C>T	G:C>A:T	4	.
chr1	85620051	.	C	T	.	normal_artifact;strand_bias;weak_evidence	AS_FilterStatus=weak_evidence,strand_bias;AS_SB_TABLE=77,32|0,3;DP=117;ECNT=1;GERMQ=93;MBQ=35,37;MFRL=147,198;MMQ=44,40;MPOS=41;NALOD=-6.304e-01;NLOD=11.57;POPAF=6.00;TLOD=3.91;ANN=T|splice_region_variant&intron_variant|LOW|Sp140|ENSMUSG00000070031|transcript|ENSMUST00000080204|protein_coding|5/16|c.503-5C>T||||||	GT:AD:AF:DP:F1R2:F2R1:SB	0/0:65,1:0.037:66:26,1:38,0:44,21,0,1	0/1:44,2:0.074:46:23,0:21,2:33,11,0,2	RY1114T6	chr1_85620051_C>T	65	1	44	2	splice_region_variant&intron_variant	LOW	Sp140	.	snv	C>T	G:C>A:T	1	.
chr1	85621656	.	T	G	.	map_qual;normal_artifact;weak_evidence	AS_FilterStatus=weak_evidence,map_qual;AS_SB_TABLE=150,150|9,2;DP=324;ECNT=2;GERMQ=93;MBQ=20,37;MFRL=153,171;MMQ=27,23;MPOS=45;NALOD=-5.458e+00;NLOD=15.23;POPAF=6.00;TLOD=3.82;ANN=G|missense_variant&splice_region_variant|MODERATE|Sp140|ENSMUSG00000070031|transcript|ENSMUST00000080204|protein_coding|7/17|c.607T>G|p.Cys203Gly|1064/2417|607/1605|203/534||	GT:AD:AF:DP:F1R2:F2R1:SB	0/0:157,6:0.063:163:65,3:91,3:78,79,6,0	0/1:143,5:0.056:148:59,1:81,4:72,71,3,2	RY1114T6	chr1_85621656_T>G	157	6	143	5	missense_variant&splice_region_variant	MODERATE	Sp140	.	snv	T>G	A:T>C:G	4	.
chr1	85621722	.	G	A	.	map_qual;normal_artifact;weak_evidence	AS_FilterStatus=weak_evidence,map_qual;AS_SB_TABLE=11,134|0,12;DP=170;ECNT=2;GERMQ=93;MBQ=37,34;MFRL=171,172;MMQ=27,23;MPOS=39;NALOD=-9.856e+00;NLOD=2.35;POPAF=6.00;TLOD=4.11;ANN=A|intron_variant|MODIFIER|Sp140|ENSMUSG00000070031|transcript|ENSMUST00000080204|protein_coding|7/16|c.658+15G>A||||||	GT:AD:AF:DP:F1R2:F2R1:SB	0/0:74,8:0.105:82:40,4:34,4:6,68,0,8	0/1:71,4:0.064:75:33,2:38,2:5,66,0,4	RY1114T6	chr1_85621722_G>A	74	8	71	4	intron_variant	MODIFIER	Sp140	.	snv	G>A	G:C>A:T	2	.
chr1	86582358	.	G	GGT	.	clustered_events;germline;haplotype;weak_evidence	AS_FilterStatus=weak_evidence;AS_SB_TABLE=10,12|1,1;DP=25;ECNT=7;GERMQ=2;MBQ=20,20;MFRL=136,129;MMQ=60,60;MPOS=37;NALOD=0.974;NLOD=2.41;POPAF=6.00;TLOD=7.52;ANN=GGT|5_prime_UTR_variant|MODIFIER|Pde6d|ENSMUSG00000026239|transcript|ENSMUST00000027444|protein_coding|1/5|c.-10_-9insAC|||||10|,GGT|upstream_gene_variant|MODIFIER|Cops7b|ENSMUSG00000026240|transcript|ENSMUST00000027446|protein_coding||c.…	GT:AD:AF:DP:F1R2:F2R1:PGT:PID:PS:SB	0|0:14,0:0.097:14:7,0:7,0:0|1:86582358_G_GGT:86582358:6,8,0,0	0|1:8,2:0.286:10:7,0:0,2:0|1:86582358_G_GGT:86582358:4,4,1,1	RY1114T6	chr1_86582358_G>GGT	14	0	8	2	5_prime_UTR_variant	MODIFIER	Pde6d	.	indel	.	.	1	.
chr1	86582359	.	CCT	C	.	clustered_events;germline;haplotype;weak_evidence	AS_FilterStatus=weak_evidence;AS_SB_TABLE=10,12|1,1;DP=25;ECNT=7;GERMQ=2;MBQ=20,30;MFRL=136,129;MMQ=60,60;MPOS=37;NALOD=0.974;NLOD=2.41;POPAF=6.00;TLOD=7.52;ANN=C|5_prime_UTR_variant|MODIFIER|Pde6d|ENSMUSG00000026239|transcript|ENSMUST00000027444|protein_coding|1/5|c.-12_-11delAG|||||11|,C|upstream_gene_variant|MODIFIER|Cops7b|ENSMUSG00000026240|transcript|ENSMUST00000027446|protein_coding||c.-48…	GT:AD:AF:DP:F1R2:F2R1:PGT:PID:PS:SB	0|0:14,0:0.097:14:7,0:7,0:0|1:86582358_G_GGT:86582358:6,8,0,0	0|1:8,2:0.286:10:8,0:0,2:0|1:86582358_G_GGT:86582358:4,4,1,1	RY1114T6	chr1_86582359_CCT>C	14	0	8	2	5_prime_UTR_variant	MODIFIER	Pde6d	.	indel	.	.	1	.
chr1	86582374	.	CC	TT	.	clustered_events;haplotype	AS_FilterStatus=SITE;AS_SB_TABLE=7,12|1,1;DP=22;ECNT=7;GERMQ=25;MBQ=20,38;MFRL=136,129;MMQ=60,60;MPOS=32;NALOD=0.954;NLOD=2.41;POPAF=6.00;TLOD=7.52;ANN=TT|5_prime_UTR_variant|MODIFIER|Pde6d|ENSMUSG00000026239|transcript|ENSMUST00000027444|protein_coding|1/5|c.-26_-25delGGinsAA|||||25|,TT|upstream_gene_variant|MODIFIER|Cops7b|ENSMUSG00000026240|transcript|ENSMUST00000027446|protein_coding||c.-4878…	GT:AD:AF:DP:F1R2:F2R1:PGT:PID:PS:SB	0|0:13,0:0.100:13:7,0:6,0:0|1:86582374_CC_TT:86582374:5,8,0,0	0|1:6,2:0.286:8:6,0:0,2:0|1:86582374_CC_TT:86582374:2,4,1,1	RY1114T6	chr1_86582374_CC>TT	13	0	6	2	5_prime_UTR_variant	MODIFIER	Pde6d	.	indel	.	.	1	.
chr1	86582378	.	C	T	.	clustered_events;haplotype	AS_FilterStatus=SITE;AS_SB_TABLE=7,12|1,1;DP=21;ECNT=7;GERMQ=25;MBQ=20,27;MFRL=136,129;MMQ=60,60;MPOS=28;NALOD=0.954;NLOD=2.41;POPAF=6.00;TLOD=7.52;ANN=T|5_prime_UTR_variant|MODIFIER|Pde6d|ENSMUSG00000026239|transcript|ENSMUST00000027444|protein_coding|1/5|c.-29G>A|||||29|,T|upstream_gene_variant|MODIFIER|Cops7b|ENSMUSG00000026240|transcript|ENSMUST00000027446|protein_coding||c.-4874C>T|||||4722|	GT:AD:AF:DP:F1R2:F2R1:PGT:PID:PS:SB	0|0:13,0:0.100:13:7,0:6,0:0|1:86582374_CC_TT:86582374:5,8,0,0	0|1:6,2:0.286:8:6,0:0,1:0|1:86582374_CC_TT:86582374:2,4,1,1	RY1114T6	chr1_86582378_C>T	13	0	6	2	5_prime_UTR_variant	MODIFIER	Pde6d	.	snv	C>T	G:C>A:T	1	.
chr1	86582382	.	G	T	.	clustered_events;haplotype	AS_FilterStatus=SITE;AS_SB_TABLE=7,12|1,1;DP=21;ECNT=7;GERMQ=25;MBQ=20,27;MFRL=136,129;MMQ=60,60;MPOS=24;NALOD=0.954;NLOD=2.41;POPAF=6.00;TLOD=7.52;ANN=T|5_prime_UTR_variant|MODIFIER|Pde6d|ENSMUSG00000026239|transcript|ENSMUST00000027444|protein_coding|1/5|c.-33C>A|||||33|,T|upstream_gene_variant|MODIFIER|Cops7b|ENSMUSG00000026240|transcript|ENSMUST00000027446|protein_coding||c.-4870G>T|||||4718|	GT:AD:AF:DP:F1R2:F2R1:PGT:PID:PS:SB	0|0:13,0:0.100:13:7,0:6,0:0|1:86582374_CC_TT:86582374:5,8,0,0	0|1:6,2:0.286:8:5,0:0,1:0|1:86582374_CC_TT:86582374:2,4,1,1	RY1114T6	chr1_86582382_G>T	13	0	6	2	5_prime_UTR_variant	MODIFIER	Pde6d	.	snv	G>T	G:C>T:A	1	.
chr1	86582386	.	GC	G	.	clustered_events;germline;haplotype;weak_evidence	AS_FilterStatus=weak_evidence;AS_SB_TABLE=6,12|1,1;DP=20;ECNT=7;GERMQ=1;MBQ=20,37;MFRL=129,129;MMQ=60,60;MPOS=20;NALOD=0.954;NLOD=2.41;POPAF=6.00;TLOD=7.52;ANN=G|5_prime_UTR_variant|MODIFIER|Pde6d|ENSMUSG00000026239|transcript|ENSMUST00000027444|protein_coding|1/5|c.-38delG|||||38|,G|upstream_gene_variant|MODIFIER|Cops7b|ENSMUSG00000026240|transcript|ENSMUST00000027446|protein_coding||c.-4865delC…	GT:AD:AF:DP:F1R2:F2R1:PGT:PID:PS:SB	0|0:13,0:0.100:13:7,0:5,0:0|1:86582374_CC_TT:86582374:5,8,0,0	0|1:5,2:0.286:7:5,0:0,2:0|1:86582374_CC_TT:86582374:1,4,1,1	RY1114T6	chr1_86582386_GC>G	13	0	5	2	5_prime_UTR_variant	MODIFIER	Pde6d	.	indel	.	.	1	.
chr1	86582390	.	C	G	.	clustered_events;haplotype	AS_FilterStatus=SITE;AS_SB_TABLE=5,12|1,1;DP=19;ECNT=7;GERMQ=22;MBQ=25,32;MFRL=122,129;MMQ=60,60;MPOS=17;NALOD=0.954;NLOD=2.41;POPAF=6.00;TLOD=7.52;ANN=G|5_prime_UTR_variant|MODIFIER|Pde6d|ENSMUSG00000026239|transcript|ENSMUST00000027444|protein_coding|1/5|c.-41G>C|||||41|,G|upstream_gene_variant|MODIFIER|Cops7b|ENSMUSG00000026240|transcript|ENSMUST00000027446|protein_coding||c.-4862C>G|||||4710|	GT:AD:AF:DP:F1R2:F2R1:PGT:PID:PS:SB	0|0:12,0:0.100:12:7,0:5,0:0|1:86582374_CC_TT:86582374:4,8,0,0	0|1:5,2:0.286:7:4,0:0,2:0|1:86582374_CC_TT:86582374:1,4,1,1	RY1114T6	chr1_86582390_C>G	12	0	5	2	5_prime_UTR_variant	MODIFIER	Pde6d	.	snv	C>G	G:C>C:G	1	.
chr1	87760110	.	G	T	.	PASS	AS_FilterStatus=SITE;AS_SB_TABLE=76,74|6,6;DP=166;ECNT=1;GERMQ=93;MBQ=20,28;MFRL=137,134;MMQ=60,60;MPOS=34;NALOD=1.70;NLOD=14.75;POPAF=6.00;TLOD=28.08;ANN=T|stop_gained|HIGH|Atg16l1|ENSMUSG00000026289|transcript|ENSMUST00000113190|protein_coding|2/19|c.175G>T|p.Glu59*|289/3102|175/1872|59/623||;LOF=(Atg16l1|ENSMUSG00000026289|1|1.00);NMD=(Atg16l1|ENSMUSG00000026289|1|1.00)	GT:AD:AF:DP:F1R2:F2R1:SB	0/0:81,0:0.020:81:32,0:49,0:43,38,0,0	0/1:69,12:0.192:81:31,3:38,9:33,36,6,6	RY1114T6	chr1_87760110_G>T	81	0	69	12	stop_gained	HIGH	Atg16l1	PASS	snv	G>T	G:C>T:A	1	PASS
chr1	87840700	.	CTGTG	C	.	weak_evidence	AS_FilterStatus=weak_evidence;AS_SB_TABLE=29,12|2,1;DP=53;ECNT=1;GERMQ=50;MBQ=20,20;MFRL=150,136;MMQ=60,60;MPOS=38;NALOD=0.857;NLOD=3.60;POPAF=6.00;RPA=15,13;RU=TG;STR;STRQ=93;TLOD=4.52;ANN=C|intron_variant|MODIFIER|Sag|ENSMUSG00000056055|transcript|ENSMUST00000077772|protein_coding|13/15|c.1038-64_1038-61delGTGT||||||INFO_REALIGN_3_PRIME	GT:AD:AF:DP:F1R2:F2R1:SB	0/0:14,0:0.070:14:3,0:10,0:12,2,0,0	0/1:27,3:0.129:30:6,0:21,3:17,10,2,1	RY1114T6	chr1_87840700_CTGTG>C	14	0	27	3	intron_variant	MODIFIER	Sag	PASS	indel	.	.	1	.
chr1	87915042	.	G	T	.	strand_bias	AS_FilterStatus=strand_bias;AS_SB_TABLE=72,15|4,0;DP=92;ECNT=1;GERMQ=93;MBQ=37,20;MFRL=148,172;MMQ=60,60;MPOS=19;NALOD=1.21;NLOD=10.43;POPAF=6.00;TLOD=5.27;ANN=T|intron_variant|MODIFIER|Dgkd|ENSMUSG00000070738|transcript|ENSMUST00000027517|protein_coding|3/29|c.349-58G>T||||||	GT:AD:AF:DP:F1R2:F2R1:SB	0/0:50,1:0.040:51:10,0:32,0:38,12,1,0	0/1:37,3:0.097:40:8,1:24,1:34,3,3,0	RY1114T6	chr1_87915042_G>T	50	1	37	3	intron_variant	MODIFIER	Dgkd	.	snv	G>T	G:C>T:A	1	.
chr1	87959694	.	G	T	.	base_qual;haplotype;weak_evidence	AS_FilterStatus=weak_evidence,base_qual;AS_SB_TABLE=16,1|3,0;DP=21;ECNT=2;GERMQ=23;MBQ=35,19;MFRL=164,167;MMQ=60,60;MPOS=29;NALOD=0.954;NLOD=2.41;POPAF=6.00;TLOD=3.61;ANN=T|intron_variant|MODIFIER|Usp40|ENSMUSG00000005501|transcript|ENSMUST00000040783|protein_coding|20/27|c.2523+95C>A||||||	GT:AD:AF:DP:F1R2:F2R1:PGT:PID:PS:SB	0|0:9,0:0.100:9:0,0:6,0:0|1:87959694_G_T:87959694:8,1,0,0	0|1:8,3:0.299:11:6,1:1,0:0|1:87959694_G_T:87959694:8,0,3,0	RY1114T6	chr1_87959694_G>T	9	0	8	3	intron_variant	MODIFIER	Usp40	.	snv	G>T	G:C>T:A	1	.
chr1	87959699	.	G	T	.	base_qual;haplotype;weak_evidence	AS_FilterStatus=weak_evidence,base_qual;AS_SB_TABLE=23,1|3,0;DP=30;ECNT=2;GERMQ=42;MBQ=37,12;MFRL=161,167;MMQ=60,60;MPOS=34;NALOD=1.08;NLOD=3.31;POPAF=6.00;TLOD=3.05;ANN=T|intron_variant|MODIFIER|Usp40|ENSMUSG00000005501|transcript|ENSMUST00000040783|protein_coding|20/27|c.2523+90C>A||||||	GT:AD:AF:DP:F1R2:F2R1:PGT:PID:PS:SB	0|0:12,0:0.077:12:3,0:8,0:0|1:87959694_G_T:87959694:11,1,0,0	0|1:12,3:0.224:15:8,1:4,0:0|1:87959694_G_T:87959694:12,0,3,0	RY1114T6	chr1_87959699_G>T	12	0	12	3	intron_variant	MODIFIER	Usp40	PASS	snv	G>T	G:C>T:A	1	.
chr1	88056152	.	TCAAAAC	T	.	clustered_events;haplotype;normal_artifact	AS_FilterStatus=SITE;AS_SB_TABLE=227,187|8,0;DP=433;ECNT=3;GERMQ=93;MBQ=20,36;MFRL=145,173;MMQ=60,54;MPOS=13;NALOD=-2.721e+00;NLOD=37.61;POPAF=6.00;TLOD=14.60;ANN=T|disruptive_inframe_deletion|MODERATE|Ugt1a10|ENSMUSG00000090165|transcript|ENSMUST00000113142|protein_coding|1/5|c.672_677delCAAAAC|p.Lys225_Thr226del|743/2244|672/1593|224/530||,T|intragenic_variant|MODIFIER|Gm20528|ENSMUSG0000009222…	GT:AD:AF:DP:F1R2:F2R1:PGT:PID:PS:SB	0|0:222,2:0.019:224:63,0:128,2:0|1:88056152_TCAAAAC_T:88056152:119,103,2,0	0|1:192,6:0.045:198:58,0:111,6:0|1:88056152_TCAAAAC_T:88056152:108,84,6,0	RY1114T6	chr1_88056152_TCAAAAC>T	222	2	192	6	disruptive_inframe_deletion	MODERATE	Ugt1a10	.	indel	.	.	1	.
chr1	88056158	.	C	CTTTTTT	.	base_qual;clustered_events;haplotype;normal_artifact	AS_FilterStatus=base_qual;AS_SB_TABLE=220,182|8,0;DP=410;ECNT=3;GERMQ=93;MBQ=20,0;MFRL=145,173;MMQ=60,54;MPOS=14;NALOD=-2.765e+00;NLOD=36.41;POPAF=6.00;RPA=1,7;RU=T;STR;STRQ=93;TLOD=14.63;ANN=CTTTTTT|conservative_inframe_insertion|MODERATE|Ugt1a10|ENSMUSG00000090165|transcript|ENSMUST00000113142|protein_coding|1/5|c.678_679insTTTTTT|p.Thr226_Ala227insPhePhe|750/2244|679/1593|227/530||INFO_REALIGN…	GT:AD:AF:DP:F1R2:F2R1:PGT:PID:PS:SB	0|0:213,2:0.020:215:71,0:127,0:0|1:88056152_TCAAAAC_T:88056152:114,99,2,0	0|1:189,6:0.045:195:58,0:115,0:0|1:88056152_TCAAAAC_T:88056152:106,83,6,0	RY1114T6	chr1_88056158_C>CTTTTTT	213	2	189	6	conservative_inframe_insertion	MODERATE	Ugt1a10	.	indel	.	.	1	.
chr1	88056160	.	G	T	.	base_qual;clustered_events;haplotype;normal_artifact;strand_bias	AS_FilterStatus=base_qual,strand_bias;AS_SB_TABLE=217,177|8,0;DP=411;ECNT=3;GERMQ=93;MBQ=20,9;MFRL=145,173;MMQ=60,54;MPOS=21;NALOD=-2.767e+00;NLOD=36.11;POPAF=6.00;TLOD=14.71;ANN=T|missense_variant|MODERATE|Ugt1a10|ENSMUSG00000090165|transcript|ENSMUST00000113142|protein_coding|1/5|c.679G>T|p.Ala227Ser|750/2244|679/1593|227/530||,T|intragenic_variant|MODIFIER|Gm20528|ENSMUSG00000092220|gene_varia…	GT:AD:AF:DP:F1R2:F2R1:PGT:PID:PS:SB	0|0:212,2:0.020:214:71,0:129,2:0|1:88056152_TCAAAAC_T:88056152:114,98,2,0	0|1:182,6:0.047:188:57,0:117,0:0|1:88056152_TCAAAAC_T:88056152:103,79,6,0	RY1114T6	chr1_88056160_G>T	212	2	182	6	missense_variant	MODERATE	Ugt1a10	.	snv	G>T	G:C>T:A	1	.
chr1	88215598	.	C	G	.	PASS	AS_FilterStatus=SITE;AS_SB_TABLE=13,4|2,0;DP=19;ECNT=1;GERMQ=25;MBQ=34,37;MFRL=162,273;MMQ=60,60;MPOS=24;NALOD=1.000;NLOD=2.71;POPAF=6.00;TLOD=6.33;ANN=G|intron_variant|MODIFIER|Ugt1a10|ENSMUSG00000090165|transcript|ENSMUST00000113142|protein_coding|2/4|c.988-197C>G||||||,G|intron_variant|MODIFIER|Ugt1a9|ENSMUSG00000090175|transcript|ENSMUST00000073772|protein_coding|2/4|c.982-197C>G||||||,G|intr…	GT:AD:AF:DP:F1R2:F2R1:SB	0/0:12,0:0.091:12:7,0:5,0:9,3,0,0	0/1:5,2:0.375:7:4,1:1,1:4,1,2,0	RY1114T6	chr1_88215598_C>G	12	0	5	2	intron_variant	MODIFIER	Ugt1a10	.	snv	C>G	G:C>C:G	1	.
chr1	88230283	rs387004424	G	A	.	haplotype;normal_artifact;weak_evidence	AS_FilterStatus=weak_evidence;AS_SB_TABLE=94,28|1,2;ECNT=2;GERMQ=93;MBQ=37,36;MFRL=163,137;MMQ=60,60;MPOS=23;NALOD=-3.268e-01;NLOD=13.89;POPAF=6.00;TLOD=3.79;CSQ=A|ENSMUSG00000079429|ENSMUST00000113130|Transcript|intron_variant||||||||1,A|ENSMUSG00000079429|ENSMUST00000148474|Transcript|intron_variant&non_coding_transcript_variant||||||||1,A|ENSMUSG00000079429|ENSMUST00000061013|Transcript|intron…	GT:AD:AF:DP:F1R2:F2R1:PGT:PID:PS:SB	0|0:72,1:0.033:73:26,1:44,0:0|1:88230283_G_A:88230283:54,18,0,1	0|1:50,2:0.063:52:15,2:28,0:0|1:88230283_G_A:88230283:40,10,1,1	RY1114T6	chr1_88230283_G>A	72	1	50	2	intron_variant	MODIFIER	Mroh2a	.	snv	G>A	G:C>A:T	2	.
chr1	88230303	.	A	AAGGTGTTGGGAACACCTTT	.	haplotype;weak_evidence	AS_FilterStatus=weak_evidence;AS_SB_TABLE=114,50|1,1;DP=166;ECNT=2;GERMQ=93;MBQ=34,36;MFRL=155,616;MMQ=60,60;MPOS=13;NALOD=1.88;NLOD=22.28;POPAF=6.00;TLOD=3.51;ANN=AAGGTGTTGGGAACACCTTT|intron_variant|MODIFIER|Mroh2a|ENSMUSG00000079429|transcript|ENSMUST00000061013|protein_coding|3/42|c.262-39_262-38insAGGTGTTGGGAACACCTTT||||||	GT:AD:AF:DP:F1R2:F2R1:PGT:PID:PS:SB	0|0:100,0:0.013:100:40,0:59,0:0|1:88230283_G_A:88230283:67,33,0,0	0|1:64,2:0.051:66:18,2:41,0:0|1:88230283_G_A:88230283:47,17,1,1	RY1114T6	chr1_88230303_A>AAGGTGTTGGGAACACCTTT	100	0	64	2	intron_variant	MODIFIER	Mroh2a	.	indel	.	.	1	.
chr1	88233540	.	T	C	.	normal_artifact	AS_FilterStatus=SITE;AS_SB_TABLE=11,94|1,9;DP=124;ECNT=1;GERMQ=93;MBQ=36,31;MFRL=171,173;MMQ=60,60;MPOS=5;NALOD=-4.636e+00;NLOD=2.81;POPAF=6.00;TLOD=13.11;ANN=C|intron_variant|MODIFIER|Mroh2a|ENSMUSG00000079429|transcript|ENSMUST00000061013|protein_coding|7/42|c.807+72T>C||||||	GT:AD:AF:DP:F1R2:F2R1:SB	0/0:45,3:0.086:48:16,1:29,2:5,40,0,3	0/1:60,7:0.122:67:16,3:43,4:6,54,1,6	RY1114T6	chr1_88233540_T>C	45	3	60	7	intron_variant	MODIFIER	Mroh2a	.	snv	T>C	A:T>G:C	2	.
chr1	88234839	.	CT	GC	.	normal_artifact	AS_FilterStatus=SITE;AS_SB_TABLE=44,9|8,3;DP=67;ECNT=1;GERMQ=93;MBQ=35,36;MFRL=182,186;MMQ=60,60;MPOS=19;NALOD=1.48;NLOD=7.90;POPAF=6.00;TLOD=15.45;ANN=GC|intron_variant|MODIFIER|Mroh2a|ENSMUSG00000079429|transcript|ENSMUST00000061013|protein_coding|9/42|c.945-115_945-114delCTinsGC||||||	GT:AD:AF:DP:F1R2:F2R1:SB	0/0:29,5:0.033:34:13,5:15,0:24,5,5,0	0/1:24,6:0.172:30:12,5:12,1:20,4,3,3	RY1114T6	chr1_88234839_CT>GC	29	5	24	6	intron_variant	MODIFIER	Mroh2a	.	indel	.	.	2	.
chr1	88237944	.	G	A	.	normal_artifact	AS_FilterStatus=SITE;AS_SB_TABLE=143,271|11,23;DP=468;ECNT=1;GERMQ=93;MBQ=20,35;MFRL=151,151;MMQ=60,60;MPOS=16;NALOD=-2.520e+01;NLOD=7.15;POPAF=6.00;TLOD=20.59;ANN=A|missense_variant|MODERATE|Mroh2a|ENSMUSG00000079429|transcript|ENSMUST00000061013|protein_coding|15/43|c.1543G>A|p.Gly515Ser|1766/7526|1543/5040|515/1679||	GT:AD:AF:DP:F1R2:F2R1:SB	0/0:229,20:0.074:249:82,9:143,11:81,148,8,12	0/1:185,14:0.059:199:80,4:100,10:62,123,3,11	RY1114T6	chr1_88237944_G>A	229	20	185	14	missense_variant	MODERATE	Mroh2a	.	snv	G>A	G:C>A:T	3	.
chr1	88244778	.	A	T	.	PASS	AS_FilterStatus=SITE;AS_SB_TABLE=18,3|2,1;DP=25;ECNT=2;GERMQ=38;MBQ=33,37;MFRL=202,205;MMQ=60,60;MPOS=19;NALOD=1.13;NLOD=3.62;POPAF=6.00;TLOD=9.82;ANN=T|intron_variant|MODIFIER|Mroh2a|ENSMUSG00000079429|transcript|ENSMUST00000061013|protein_coding|23/42|c.2443-166A>T||||||	GT:AD:AF:DP:F1R2:F2R1:SB	0/0:12,0:0.069:12:6,0:5,0:11,1,0,0	0/1:9,3:0.331:12:5,0:3,2:7,2,2,1	RY1114T6	chr1_88244778_A>T	12	0	9	3	intron_variant	MODIFIER	Mroh2a	PASS	snv	A>T	A:T>T:A	1	PASS
chr1	88256051	.	C	A	.	normal_artifact	AS_FilterStatus=SITE;AS_SB_TABLE=142,70|26,13;DP=261;ECNT=1;GERMQ=93;MBQ=33,32;MFRL=152,160;MMQ=60,60;MPOS=25;NALOD=-1.303e+01;NLOD=6.77;POPAF=6.00;TLOD=29.54;ANN=A|splice_region_variant&intron_variant|LOW|Mroh2a|ENSMUSG00000079429|transcript|ENSMUST00000061013|protein_coding|35/42|c.4014-6C>A||||||	GT:AD:AF:DP:F1R2:F2R1:SB	0/0:122,14:0.059:136:57,7:64,7:81,41,10,4	0/1:90,25:0.129:115:32,9:58,16:61,29,16,9	RY1114T6	chr1_88256051_C>A	122	14	90	25	splice_region_variant&intron_variant	LOW	Mroh2a	.	snv	C>A	G:C>T:A	2	.
chr1	88259427	.	C	T	.	clustered_events;normal_artifact	AS_FilterStatus=SITE;AS_SB_TABLE=225,56|53,7;DP=352;ECNT=3;GERMQ=93;MBQ=35,33;MFRL=167,177;MMQ=60,60;MPOS=23;NALOD=-1.611e+01;NLOD=9.59;POPAF=6.00;TLOD=14.63;ANN=T|downstream_gene_variant|MODIFIER|Hjurp|ENSMUSG00000044783|transcript|ENSMUST00000054674|protein_coding||c.*5754G>A|||||3044|,T|intron_variant|MODIFIER|Mroh2a|ENSMUSG00000079429|transcript|ENSMUST00000061013|protein_coding|41/42|c.4853-…	GT:AD:AF:DP:F1R2:F2R1:SB	0/0:136,30:0.066:166:54,13:78,17:110,26,28,2	0/1:145,30:0.049:175:41,14:102,16:115,30,25,5	RY1114T6	chr1_88259427_C>T	136	30	145	30	downstream_gene_variant	MODIFIER	Hjurp	.	snv	C>T	G:C>A:T	2	.
chr1	88259537	.	T	C	.	clustered_events;normal_artifact	AS_FilterStatus=SITE;AS_SB_TABLE=790,712|142,91;DP=1791;ECNT=3;GERMQ=93;MBQ=20,32;MFRL=144,151;MMQ=60,60;MPOS=31;NALOD=-5.443e+01;NLOD=67.25;POPAF=6.00;TLOD=27.56;ANN=C|synonymous_variant|LOW|Mroh2a|ENSMUSG00000079429|transcript|ENSMUST00000061013|protein_coding|42/43|c.4860T>C|p.Ile1620Ile|5083/7526|4860/5040|1620/1679||,C|downstream_gene_variant|MODIFIER|Hjurp|ENSMUSG00000044783|transcript|ENSM…	GT:AD:AF:DP:F1R2:F2R1:SB	0/0:818,122:0.049:940:314,56:493,66:435,383,70,52	0/1:684,111:0.036:795:219,38:457,73:355,329,72,39	RY1114T6	chr1_88259537_T>C	818	122	684	111	synonymous_variant	LOW	Mroh2a	.	snv	T>C	A:T>G:C	3	.
chr1	88259607	.	T	C	.	clustered_events;normal_artifact	AS_FilterStatus=SITE;AS_SB_TABLE=347,691|19,113;DP=1224;ECNT=3;GERMQ=93;MBQ=34,30;MFRL=150,156;MMQ=60,60;MPOS=30;NALOD=-3.942e+01;NLOD=49.86;POPAF=6.00;TLOD=26.09;ANN=C|downstream_gene_variant|MODIFIER|Hjurp|ENSMUSG00000044783|transcript|ENSMUST00000054674|protein_coding||c.*5574A>G|||||2864|,C|intron_variant|MODIFIER|Mroh2a|ENSMUSG00000079429|transcript|ENSMUST00000061013|protein_coding|42/42|c.…	GT:AD:AF:DP:F1R2:F2R1:SB	0/0:574,63:0.061:637:237,36:325,26:190,384,11,52	0/1:464,69:0.060:533:151,16:301,53:157,307,8,61	RY1114T6	chr1_88259607_T>C	574	63	464	69	downstream_gene_variant	MODIFIER	Hjurp	.	snv	T>C	A:T>G:C	1	.
chr1	88267758	.	TA	T	.	germline;haplotype	AS_FilterStatus=SITE;AS_SB_TABLE=14,3|5,1;DP=23;ECNT=2;GERMQ=1;MBQ=34,34;MFRL=198,212;MMQ=60,60;MPOS=31;NALOD=1.11;NLOD=3.61;POPAF=6.00;TLOD=23.58;ANN=T|intron_variant|MODIFIER|Hjurp|ENSMUSG00000044783|transcript|ENSMUST00000054674|protein_coding|7/7|c.526+189delT||||||	GT:AD:AF:DP:F1R2:F2R1:PGT:PID:PS:SB	0|0:13,0:0.071:13:5,0:7,0:0|1:88267758_TA_T:88267758:10,3,0,0	0|1:4,6:0.500:10:1,4:3,2:0|1:88267758_TA_T:88267758:4,0,5,1	RY1114T6	chr1_88267758_TA>T	13	0	4	6	intron_variant	MODIFIER	Hjurp	PASS	indel	.	.	1	.
chr1	88267761	.	CATG	C	.	germline;haplotype	AS_FilterStatus=SITE;AS_SB_TABLE=14,4|5,1;DP=26;ECNT=2;GERMQ=1;MBQ=36,34;MFRL=206,212;MMQ=60,60;MPOS=31;NALOD=1.11;NLOD=3.61;POPAF=6.00;TLOD=23.57;ANN=C|intron_variant|MODIFIER|Hjurp|ENSMUSG00000044783|transcript|ENSMUST00000054674|protein_coding|7/7|c.526+184_526+186delCAT||||||	GT:AD:AF:DP:F1R2:F2R1:PGT:PID:PS:SB	0|0:13,0:0.071:13:5,0:8,0:0|1:88267758_TA_T:88267758:10,3,0,0	0|1:5,6:0.501:11:1,4:3,2:0|1:88267758_TA_T:88267758:4,1,5,1	RY1114T6	chr1_88267761_CATG>C	13	0	5	6	intron_variant	MODIFIER	Hjurp	PASS	indel	.	.	1	.
chr1	88354620	.	C	T	.	weak_evidence	AS_FilterStatus=weak_evidence;AS_SB_TABLE=1,20|1,1;DP=23;ECNT=1;GERMQ=43;MBQ=36,20;MFRL=214,116;MMQ=60,60;MPOS=43;NALOD=1.18;NLOD=4.21;POPAF=6.00;TLOD=3.15;ANN=T|upstream_gene_variant|MODIFIER|4930453O03Rik|ENSMUSG00000085420|transcript|ENSMUST00000147594|antisense||n.-1690G>A|||||1690|,T|intron_variant|MODIFIER|Trpm8|ENSMUSG00000036251|transcript|ENSMUST00000040210|protein_coding|16/25|c.2138+99…	GT:AD:AF:DP:F1R2:F2R1:SB	0/0:15,0:0.063:15:7,0:8,0:1,14,0,0	0/1:6,2:0.222:8:3,0:3,2:0,6,1,1	RY1114T6	chr1_88354620_C>T	15	0	6	2	upstream_gene_variant	MODIFIER	4930453O03Rik	.	snv	C>T	G:C>A:T	1	.
chr1	91444596	.	C	A	.	weak_evidence	AS_FilterStatus=weak_evidence;AS_SB_TABLE=11,12|1,1;DP=26;ECNT=1;GERMQ=43;MBQ=36,20;MFRL=178,129;MMQ=60,60;MPOS=36;NALOD=1.08;NLOD=3.31;POPAF=6.00;TLOD=3.04;ANN=A|missense_variant|MODERATE|Per2|ENSMUSG00000055866|transcript|ENSMUST00000069620|protein_coding|6/23|c.755G>T|p.Cys252Phe|931/5837|755/3774|252/1257||	GT:AD:AF:DP:F1R2:F2R1:SB	0/0:13,0:0.077:13:5,0:8,0:6,7,0,0	0/1:10,2:0.197:12:4,2:6,0:5,5,1,1	RY1114T6	chr1_91444596_C>A	13	0	10	2	missense_variant	MODERATE	Per2	.	snv	C>A	G:C>T:A	1	.
chr1	91499599	.	C	T	.	weak_evidence	AS_FilterStatus=weak_evidence;AS_SB_TABLE=67,70|1,2;DP=146;ECNT=1;GERMQ=93;MBQ=20,20;MFRL=147,137;MMQ=60,60;MPOS=30;NALOD=1.64;NLOD=12.94;POPAF=6.00;TLOD=4.12;ANN=T|missense_variant|MODERATE|Traf3ip1|ENSMUSG00000034292|transcript|ENSMUST00000047242|protein_coding|3/15|c.290C>T|p.Ala97Val|388/3496|290/1878|97/625||	GT:AD:AF:DP:F1R2:F2R1:SB	0/0:55,0:0.022:55:25,0:30,0:29,26,0,0	0/1:82,3:0.047:85:41,2:40,1:38,44,1,2	RY1114T6	chr1_91499599_C>T	55	0	82	3	missense_variant	MODERATE	Traf3ip1	PASS	snv	C>T	G:C>A:T	1	.
chr1	92588211	.	C	G	.	weak_evidence	AS_FilterStatus=weak_evidence;AS_SB_TABLE=10,0|1,0;DP=11;ECNT=1;GERMQ=22;MBQ=36,38;MFRL=197,194;MMQ=60,60;MPOS=41;NALOD=0.954;NLOD=2.41;POPAF=6.00;TLOD=3.20;ANN=G|upstream_gene_variant|MODIFIER|Olfr1412|ENSMUSG00000046300|transcript|ENSMUST00000062964|protein_coding||c.-121C>G|||||121|,G|intergenic_region|MODIFIER|Olfr1413-Olfr1412|ENSMUSG00000058904-ENSMUSG00000046300|intergenic_region|ENSMUSG00…	GT:AD:AF:DP:F1R2:F2R1:SB	0/0:8,0:0.100:8:4,0:4,0:8,0,0,0	0/1:2,1:0.400:3:1,0:1,1:2,0,1,0	RY1114T6	chr1_92588211_C>G	8	0	2	1	upstream_gene_variant	MODIFIER	Olfr1412	.	snv	C>G	G:C>C:G	1	.
chr1	93154642	.	T	C	.	weak_evidence	AS_FilterStatus=weak_evidence;AS_SB_TABLE=7,15|1,1;DP=25;ECNT=1;GERMQ=39;MBQ=35,20;MFRL=157,120;MMQ=60,60;MPOS=38;NALOD=1.11;NLOD=3.61;POPAF=6.00;TLOD=3.28;ANN=C|splice_acceptor_variant&intron_variant|HIGH|2310007B03Rik|ENSMUSG00000034159|transcript|ENSMUST00000043718|protein_coding|3/5|c.756-2A>G||||||;LOF=(2310007B03Rik|ENSMUSG00000034159|1|1.00)	GT:AD:AF:DP:F1R2:F2R1:SB	0/0:15,0:0.071:15:6,0:9,0:4,11,0,0	0/1:7,2:0.250:9:4,0:3,2:3,4,1,1	RY1114T6	chr1_93154642_T>C	15	0	7	2	splice_acceptor_variant&intron_variant	HIGH	2310007B03Rik	.	snv	T>C	A:T>G:C	1	.
chr1	93280445	.	G	T	.	weak_evidence	AS_FilterStatus=weak_evidence;AS_SB_TABLE=54,12|2,0;DP=70;ECNT=1;GERMQ=93;MBQ=36,35;MFRL=155,166;MMQ=60,60;MPOS=13;NALOD=1.49;NLOD=8.98;POPAF=6.00;TLOD=3.91;ANN=T|intron_variant|MODIFIER|Sned1|ENSMUSG00000047793|transcript|ENSMUST00000062202|protein_coding|16/30|c.2258-36G>T||||||	GT:AD:AF:DP:F1R2:F2R1:SB	0/0:34,0:0.031:34:13,0:20,0:29,5,0,0	0/1:32,2:0.099:34:10,1:21,1:25,7,2,0	RY1114T6	chr1_93280445_G>T	34	0	32	2	intron_variant	MODIFIER	Sned1	.	snv	G>T	G:C>T:A	1	.
chr1	93914137	.	G	T	.	map_qual	AS_FilterStatus=map_qual;AS_SB_TABLE=34,55|2,2;DP=95;ECNT=1;GERMQ=93;MBQ=20,20;MFRL=157,150;MMQ=25,25;MPOS=27;NALOD=1.53;NLOD=9.93;POPAF=6.00;TLOD=5.57;ANN=T|intergenic_region|MODIFIER|Gal3st2-Gm9994|ENSMUSG00000094651-ENSMUSG00000093805|intergenic_region|ENSMUSG00000094651-ENSMUSG00000093805|||n.93914137G>T||||||	GT:AD:AF:DP:F1R2:F2R1:SB	0/0:47,0:0.029:47:21,0:26,0:17,30,0,0	0/1:42,4:0.086:46:16,2:26,2:17,25,2,2	RY1114T6	chr1_93914137_G>T	47	0	42	4	intergenic_region	MODIFIER	Gal3st2-Gm9994	PASS	snv	G>T	G:C>T:A	1	.
chr1	102106433	.	TCTCTCTCG	T	.	base_qual;weak_evidence	AS_FilterStatus=weak_evidence,base_qual;AS_SB_TABLE=22,2|2,0;DP=27;ECNT=1;GERMQ=19;MBQ=36,15;MFRL=167,244;MMQ=60,56;MPOS=36;NALOD=1.17;NLOD=4.16;POPAF=6.00;TLOD=4.40;ANN=T|downstream_gene_variant|MODIFIER|Gm24122|ENSMUSG00000077295|transcript|ENSMUST00000104107|snoRNA||n.*8_*15delCGAGAGAG|||||15|,T|intergenic_region|MODIFIER|Gm25537-Gm24122|ENSMUSG00000077039-ENSMUSG00000077295|intergenic_region|…	GT:AD:AF:DP:F1R2:F2R1:SB	0/0:14,0:0.063:14:4,0:2,0:14,0,0,0	0/1:10,2:0.230:12:4,0:4,0:8,2,2,0	RY1114T6	chr1_102106433_TCTCTCTCG>T	14	0	10	2	downstream_gene_variant	MODIFIER	Gm24122	.	indel	.	.	1	.
chr1	106030758	.	T	C	.	clustered_events;haplotype;normal_artifact	AS_FilterStatus=SITE;AS_SB_TABLE=80,34|1,1;DP=118;ECNT=7;GERMQ=93;MBQ=33,36;MFRL=156,143;MMQ=60,60;MPOS=15;NALOD=-1.143e+00;NLOD=9.65;POPAF=6.00;TLOD=5.63;ANN=C|synonymous_variant|LOW|Zcchc2|ENSMUSG00000038866|transcript|ENSMUST00000118196|protein_coding|13/14|c.2958T>C|p.Asn986Asn|3059/5513|2958/3501|986/1166||	GT:AD:AF:DP:F1R2:F2R1:PGT:PID:PS:SB	0|0:56,1:0.041:57:26,0:25,0:0|1:106030758_T_C:106030758:41,15,0,1	0|1:58,1:0.040:59:22,0:32,1:0|1:106030758_T_C:106030758:39,19,1,0	RY1114T6	chr1_106030758_T>C	56	1	58	1	synonymous_variant	LOW	Zcchc2	.	snv	T>C	A:T>G:C	1	.
chr1	106030764	.	C	T	.	clustered_events;haplotype;normal_artifact	AS_FilterStatus=SITE;AS_SB_TABLE=86,37|1,2;DP=126;ECNT=7;GERMQ=93;MBQ=32,36;MFRL=155,115;MMQ=60,60;MPOS=4;NALOD=-1.077e+00;NLOD=10.85;POPAF=6.00;TLOD=5.59;ANN=T|synonymous_variant|LOW|Zcchc2|ENSMUSG00000038866|transcript|ENSMUST00000118196|protein_coding|13/14|c.2964C>T|p.Asn988Asn|3065/5513|2964/3501|988/1166||	GT:AD:AF:DP:F1R2:F2R1:PGT:PID:PS:SB	0|0:62,1:0.038:63:25,0:31,1:0|1:106030758_T_C:106030758:45,17,0,1	0|1:61,2:0.038:63:25,0:36,2:0|1:106030758_T_C:106030758:41,20,1,1	RY1114T6	chr1_106030764_C>T	62	1	61	2	synonymous_variant	LOW	Zcchc2	.	snv	C>T	G:C>A:T	2	.
chr1	106030770	.	CA	AG	.	clustered_events;haplotype;normal_artifact	AS_FilterStatus=SITE;AS_SB_TABLE=87,40|1,2;DP=131;ECNT=7;GERMQ=93;MBQ=35,37;MFRL=155,115;MMQ=60,60;MPOS=10;NALOD=-1.060e+00;NLOD=11.15;POPAF=6.00;TLOD=5.59;ANN=AG|missense_variant|MODERATE|Zcchc2|ENSMUSG00000038866|transcript|ENSMUST00000118196|protein_coding|13/14|c.2970_2971delCAinsAG|p.Ile991Val|3071/5513|2970/3501|990/1166||	GT:AD:AF:DP:F1R2:F2R1:PGT:PID:PS:SB	0|0:61,1:0.037:62:28,0:31,1:0|1:106030758_T_C:106030758:45,16,0,1	0|1:66,2:0.038:68:26,0:37,2:0|1:106030758_T_C:106030758:42,24,1,1	RY1114T6	chr1_106030770_CA>AG	61	1	66	2	missense_variant	MODERATE	Zcchc2	.	indel	.	.	2	.
chr1	106030782	.	A	G	.	clustered_events;normal_artifact;weak_evidence	AS_FilterStatus=weak_evidence;AS_SB_TABLE=88,47|1,2;DP=143;ECNT=7;GERMQ=93;MBQ=32,20;MFRL=153,115;MMQ=60,60;MPOS=22;NALOD=-1.056e+00;NLOD=11.15;POPAF=6.00;TLOD=3.49;ANN=G|synonymous_variant|LOW|Zcchc2|ENSMUSG00000038866|transcript|ENSMUST00000118196|protein_coding|13/14|c.2982A>G|p.Pro994Pro|3083/5513|2982/3501|994/1166||	GT:AD:AF:DP:F1R2:F2R1:SB	0/0:66,1:0.037:67:29,0:36,1:46,20,0,1	0/1:69,2:0.035:71:24,0:44,2:42,27,1,1	RY1114T6	chr1_106030782_A>G	66	1	69	2	synonymous_variant	LOW	Zcchc2	.	snv	A>G	A:T>G:C	1	.
chr1	106030791	.	G	GGGCTCA	.	clustered_events;haplotype;normal_artifact;weak_evidence	AS_FilterStatus=weak_evidence;AS_SB_TABLE=93,52|1,2;DP=151;ECNT=7;GERMQ=93;MBQ=31,20;MFRL=153,115;MMQ=60,60;MPOS=31;NALOD=-1.007e+00;NLOD=12.07;POPAF=6.00;TLOD=5.47;ANN=GGGCTCA|disruptive_inframe_insertion|MODERATE|Zcchc2|ENSMUSG00000038866|transcript|ENSMUST00000118196|protein_coding|13/14|c.2993_2994insCTCAGG|p.Gly998_Pro999insSerGly|3095/5513|2994/3501|998/1166||INFO_REALIGN_3_PRIME	GT:AD:AF:DP:F1R2:F2R1:PGT:PID:PS:SB	0|0:71,1:0.035:72:29,0:39,1:0|1:106030791_G_GGGCTCA:106030791:48,23,0,1	0|1:74,2:0.033:76:26,0:47,2:0|1:106030791_G_GGGCTCA:106030791:45,29,1,1	RY1114T6	chr1_106030791_G>GGGCTCA	71	1	74	2	disruptive_inframe_insertion	MODERATE	Zcchc2	.	indel	.	.	2	.
chr1	106030797	.	C	T	.	clustered_events;haplotype;normal_artifact	AS_FilterStatus=SITE;AS_SB_TABLE=94,55|1,2;DP=155;ECNT=7;GERMQ=93;MBQ=27,20;MFRL=153,115;MMQ=60,60;MPOS=40;NALOD=-9.964e-01;NLOD=12.36;POPAF=6.00;TLOD=5.44;ANN=T|synonymous_variant|LOW|Zcchc2|ENSMUSG00000038866|transcript|ENSMUST00000118196|protein_coding|13/14|c.2997C>T|p.Pro999Pro|3098/5513|2997/3501|999/1166||	GT:AD:AF:DP:F1R2:F2R1:PGT:PID:PS:SB	0|0:74,1:0.034:75:33,0:40,1:0|1:106030791_G_GGGCTCA:106030791:49,25,0,1	0|1:75,2:0.033:77:27,0:47,2:0|1:106030791_G_GGGCTCA:106030791:45,30,1,1	RY1114T6	chr1_106030797_C>T	74	1	75	2	synonymous_variant	LOW	Zcchc2	.	snv	C>T	G:C>A:T	2	.
chr1	106030827	.	C	T	.	clustered_events;normal_artifact;weak_evidence	AS_FilterStatus=weak_evidence;AS_SB_TABLE=99,75|1,2;DP=184;ECNT=7;GERMQ=93;MBQ=20,20;MFRL=154,115;MMQ=60,60;MPOS=27;NALOD=-8.782e-01;NLOD=14.76;POPAF=6.00;TLOD=3.31;ANN=T|synonymous_variant|LOW|Zcchc2|ENSMUSG00000038866|transcript|ENSMUST00000118196|protein_coding|13/14|c.3027C>T|p.Cys1009Cys|3128/5513|3027/3501|1009/1166||	GT:AD:AF:DP:F1R2:F2R1:SB	0/0:89,1:0.030:90:37,0:52,1:50,39,0,1	0/1:85,2:0.029:87:29,0:55,2:49,36,1,1	RY1114T6	chr1_106030827_C>T	89	1	85	2	synonymous_variant	LOW	Zcchc2	.	snv	C>T	G:C>A:T	2	.
chr1	106343309	.	C	A	.	weak_evidence	AS_FilterStatus=weak_evidence;AS_SB_TABLE=37,0|2,0;DP=40;ECNT=1;GERMQ=90;MBQ=36,35;MFRL=180,156;MMQ=60,60;MPOS=9;NALOD=1.40;NLOD=7.22;POPAF=6.00;TLOD=4.62;ANN=A|intron_variant|MODIFIER|Phlpp1|ENSMUSG00000044340|transcript|ENSMUST00000061047|protein_coding|6/16|c.2313-68C>A||||||	GT:AD:AF:DP:F1R2:F2R1:SB	0/0:24,0:0.038:24:7,0:17,0:24,0,0,0	0/1:13,2:0.175:15:6,1:7,1:13,0,2,0	RY1114T6	chr1_106343309_C>A	24	0	13	2	intron_variant	MODIFIER	Phlpp1	.	snv	C>A	G:C>T:A	1	.
chr1	120607153	.	T	C	.	PASS	AS_FilterStatus=SITE;AS_SB_TABLE=36,56|1,2;DP=96;ECNT=1;GERMQ=93;MBQ=20,20;MFRL=145,123;MMQ=60,60;MPOS=28;NALOD=1.52;NLOD=9.63;POPAF=6.00;TLOD=6.08;ANN=C|synonymous_variant|LOW|En1|ENSMUSG00000058665|transcript|ENSMUST00000079721|protein_coding|2/2|c.1170T>C|p.Ser390Ser|1785/3928|1170/1206|390/401||	GT:AD:AF:DP:F1R2:F2R1:SB	0/0:45,0:0.029:45:22,0:22,0:18,27,0,0	0/1:47,3:0.079:50:15,0:31,3:18,29,1,2	RY1114T6	chr1_120607153_T>C	45	0	47	3	synonymous_variant	LOW	En1	PASS	snv	T>C	A:T>G:C	1	PASS
chr1	121307248	.	C	A	.	PASS	AS_FilterStatus=SITE;AS_SB_TABLE=83,86|2,2;DP=181;ECNT=1;GERMQ=93;MBQ=34,35;MFRL=149,200;MMQ=60,60;MPOS=28;NALOD=1.78;NLOD=17.76;POPAF=6.00;TLOD=7.84;ANN=A|missense_variant|MODERATE|Insig2|ENSMUSG00000003721|transcript|ENSMUST00000003818|protein_coding|4/6|c.428G>T|p.Gly143Val|894/2697|428/678|143/225||	GT:AD:AF:DP:F1R2:F2R1:SB	0/0:78,0:0.016:78:29,0:49,0:35,43,0,0	0/1:91,4:0.065:95:27,2:64,2:48,43,2,2	RY1114T6	chr1_121307248_C>A	78	0	91	4	missense_variant	MODERATE	Insig2	PASS	snv	C>A	G:C>T:A	1	PASS
chr1	128277127	.	C	A	.	PASS	AS_FilterStatus=SITE;AS_SB_TABLE=45,140|2,5;DP=198;ECNT=1;GERMQ=93;MBQ=35,20;MFRL=145,153;MMQ=60,60;MPOS=38;NALOD=1.90;NLOD=23.48;POPAF=6.00;TLOD=13.30;ANN=A|3_prime_UTR_variant|MODIFIER|Ubxn4|ENSMUSG00000026353|transcript|ENSMUST00000027592|protein_coding|13/13|c.*32C>A|||||32|	GT:AD:AF:DP:F1R2:F2R1:SB	0/0:103,0:0.012:103:34,0:69,0:26,77,0,0	0/1:82,7:0.082:89:27,5:55,2:19,63,2,5	RY1114T6	chr1_128277127_C>A	103	0	82	7	3_prime_UTR_variant	MODIFIER	Ubxn4	PASS	snv	C>A	G:C>T:A	1	PASS
chr1	128301223	.	A	T	.	clustered_events;haplotype;strand_bias;weak_evidence	AS_FilterStatus=weak_evidence,strand_bias;AS_SB_TABLE=64,45|0,2;DP=111;ECNT=3;GERMQ=93;MBQ=35,36;MFRL=166,0;MMQ=60,37;MPOS=27;NALOD=1.63;NLOD=12.64;POPAF=6.00;TLOD=4.26;ANN=T|synonymous_variant|LOW|Lct|ENSMUSG00000026354|transcript|ENSMUST00000073490|protein_coding|8/17|c.2532T>A|p.Ile844Ile|2547/6174|2532/5796|844/1931||	GT:AD:AF:DP:F1R2:F2R1:PGT:PID:PS:SB	0|0:53,0:0.023:53:19,0:29,0:0|1:128301223_A_T:128301223:32,21,0,0	0|1:56,2:0.060:58:23,0:32,2:0|1:128301223_A_T:128301223:32,24,0,2	RY1114T6	chr1_128301223_A>T	53	0	56	2	synonymous_variant	LOW	Lct	.	snv	A>T	A:T>T:A	1	.
chr1	128301232	.	G	A	.	clustered_events;haplotype;strand_bias;weak_evidence	AS_FilterStatus=weak_evidence,strand_bias;AS_SB_TABLE=62,44|0,2;DP=108;ECNT=3;GERMQ=93;MBQ=36,39;MFRL=166,0;MMQ=60,37;MPOS=34;NALOD=1.65;NLOD=13.24;POPAF=6.00;TLOD=4.29;ANN=A|synonymous_variant|LOW|Lct|ENSMUSG00000026354|transcript|ENSMUST00000073490|protein_coding|8/17|c.2523C>T|p.Thr841Thr|2538/6174|2523/5796|841/1931||	GT:AD:AF:DP:F1R2:F2R1:PGT:PID:PS:SB	0|0:51,0:0.022:51:20,0:29,0:0|1:128301223_A_T:128301223:30,21,0,0	0|1:55,2:0.061:57:25,0:29,2:0|1:128301223_A_T:128301223:32,23,0,2	RY1114T6	chr1_128301232_G>A	51	0	55	2	synonymous_variant	LOW	Lct	.	snv	G>A	G:C>A:T	1	.
chr1	128301238	.	G	A	.	clustered_events;haplotype;strand_bias;weak_evidence	AS_FilterStatus=weak_evidence,strand_bias;AS_SB_TABLE=61,45|0,2;DP=111;ECNT=3;GERMQ=93;MBQ=36,37;MFRL=166,0;MMQ=60,37;MPOS=34;NALOD=1.68;NLOD=13.85;POPAF=6.00;TLOD=4.34;ANN=A|synonymous_variant|LOW|Lct|ENSMUSG00000026354|transcript|ENSMUST00000073490|protein_coding|8/17|c.2517C>T|p.Phe839Phe|2532/6174|2517/5796|839/1931||	GT:AD:AF:DP:F1R2:F2R1:PGT:PID:PS:SB	0|0:55,0:0.020:55:23,0:30,0:0|1:128301223_A_T:128301223:31,24,0,0	0|1:51,2:0.064:53:23,0:28,2:0|1:128301223_A_T:128301223:30,21,0,2	RY1114T6	chr1_128301238_G>A	55	0	51	2	synonymous_variant	LOW	Lct	.	snv	G>A	G:C>A:T	1	.
chr1	130210140	.	CTG	C	.	normal_artifact;slippage	AS_FilterStatus=SITE;AS_SB_TABLE=45,0|9,0;DP=56;ECNT=1;GERMQ=26;MBQ=36,37;MFRL=168,170;MMQ=60,60;MPOS=26;NALOD=0.364;NLOD=5.54;POPAF=6.00;RPA=16,15;RU=TG;STR;STRQ=1;TLOD=12.56;ANN=C|intron_variant|MODIFIER|Thsd7b|ENSMUSG00000042581|transcript|ENSMUST00000073527|protein_coding|26/27|c.4655-69_4655-68delGT||||||INFO_REALIGN_3_PRIME	GT:AD:AF:DP:F1R2:F2R1:SB	0/0:24,1:0.068:25:9,1:13,0:24,0,1,0	0/1:21,8:0.265:29:3,0:18,8:21,0,8,0	RY1114T6	chr1_130210140_CTG>C	24	1	21	8	intron_variant	MODIFIER	Thsd7b	.	indel	.	.	1	.
chr1	130706355	.	GGA	G	.	normal_artifact;slippage;weak_evidence	AS_FilterStatus=weak_evidence;AS_SB_TABLE=82,23|8,2;DP=141;ECNT=1;GERMQ=93;MBQ=36,37;MFRL=151,147;MMQ=60,60;MPOS=26;NALOD=-3.483e+00;NLOD=5.29;POPAF=6.00;RPA=16,15;RU=GA;STR;STRQ=1;TLOD=4.43;ANN=G|intron_variant|MODIFIER|Pfkfb2|ENSMUSG00000026409|transcript|ENSMUST00000050406|protein_coding|7/14|c.513+69_513+70delTC||||||	GT:AD:AF:DP:F1R2:F2R1:SB	0/0:55,4:0.087:59:12,1:32,3:42,13,4,0	0/1:50,6:0.124:56:14,2:32,2:40,10,4,2	RY1114T6	chr1_130706355_GGA>G	55	4	50	6	intron_variant	MODIFIER	Pfkfb2	.	indel	.	.	2	.
chr1	131055049	.	T	C	.	weak_evidence	AS_FilterStatus=weak_evidence;AS_SB_TABLE=15,6|1,1;DP=27;ECNT=1;GERMQ=37;MBQ=34,20;MFRL=143,115;MMQ=60,60;MPOS=21;NALOD=1.03;NLOD=2.71;POPAF=6.00;TLOD=3.05;ANN=C|3_prime_UTR_variant|MODIFIER|Mapkapk2|ENSMUSG00000016528|transcript|ENSMUST00000016672|protein_coding|10/10|c.*43A>G|||||43|	GT:AD:AF:DP:F1R2:F2R1:SB	0/0:11,0:0.085:11:4,0:7,0:8,3,0,0	0/1:10,2:0.195:12:4,0:6,2:7,3,1,1	RY1114T6	chr1_131055049_T>C	11	0	10	2	3_prime_UTR_variant	MODIFIER	Mapkapk2	.	snv	T>C	A:T>G:C	1	.
chr1	131363945	.	A	G	.	clustered_events;haplotype	AS_FilterStatus=SITE;AS_SB_TABLE=30,10|1,1;DP=42;ECNT=9;GERMQ=84;MBQ=34,38;MFRL=162,117;MMQ=60,52;MPOS=27;NALOD=1.23;NLOD=4.82;POPAF=6.00;TLOD=5.68;ANN=G|intron_variant|MODIFIER|Srgap2|ENSMUSG00000026425|transcript|ENSMUST00000097588|protein_coding|5/22|c.486+57T>C||||||	GT:AD:AF:DP:F1R2:F2R1:PGT:PID:PS:SB	0|0:20,0:0.056:20:10,0:9,0:0|1:131363945_A_G:131363945:16,4,0,0	0|1:20,2:0.166:22:4,2:14,0:0|1:131363945_A_G:131363945:14,6,1,1	RY1114T6	chr1_131363945_A>G	20	0	20	2	intron_variant	MODIFIER	Srgap2	.	snv	A>G	A:T>G:C	1	.
chr1	131363947	.	A	T	.	clustered_events;haplotype	AS_FilterStatus=SITE;AS_SB_TABLE=30,10|1,1;DP=44;ECNT=9;GERMQ=84;MBQ=26,38;MFRL=162,117;MMQ=60,52;MPOS=29;NALOD=1.23;NLOD=4.82;POPAF=6.00;TLOD=5.67;ANN=T|intron_variant|MODIFIER|Srgap2|ENSMUSG00000026425|transcript|ENSMUST00000097588|protein_coding|5/22|c.486+55T>A||||||	GT:AD:AF:DP:F1R2:F2R1:PGT:PID:PS:SB	0|0:20,0:0.056:20:10,0:10,0:0|1:131363945_A_G:131363945:16,4,0,0	0|1:20,2:0.165:22:4,2:16,0:0|1:131363945_A_G:131363945:14,6,1,1	RY1114T6	chr1_131363947_A>T	20	0	20	2	intron_variant	MODIFIER	Srgap2	.	snv	A>T	A:T>T:A	1	.
chr1	131363963	.	T	C	.	clustered_events;haplotype	AS_FilterStatus=SITE;AS_SB_TABLE=34,16|1,1;DP=52;ECNT=9;GERMQ=93;MBQ=23,37;MFRL=162,117;MMQ=60,52;MPOS=42;NALOD=1.26;NLOD=5.12;POPAF=6.00;TLOD=5.27;ANN=C|intron_variant|MODIFIER|Srgap2|ENSMUSG00000026425|transcript|ENSMUST00000097588|protein_coding|5/22|c.486+39A>G||||||	GT:AD:AF:DP:F1R2:F2R1:PGT:PID:PS:SB	0|0:24,0:0.053:24:11,0:12,0:0|1:131363963_T_C:131363963:16,8,0,0	0|1:26,2:0.125:28:5,2:20,0:0|1:131363963_T_C:131363963:18,8,1,1	RY1114T6	chr1_131363963_T>C	24	0	26	2	intron_variant	MODIFIER	Srgap2	.	snv	T>C	A:T>G:C	1	.
chr1	131363967	.	T	TGC	.	clustered_events;haplotype;weak_evidence	AS_FilterStatus=weak_evidence;AS_SB_TABLE=34,19|1,1;DP=55;ECNT=9;GERMQ=76;MBQ=20,38;MFRL=160,117;MMQ=60,52;MPOS=42;NALOD=1.30;NLOD=5.72;POPAF=6.00;TLOD=5.27;ANN=TGC|intron_variant|MODIFIER|Srgap2|ENSMUSG00000026425|transcript|ENSMUST00000097588|protein_coding|5/22|c.486+34_486+35insGC||||||	GT:AD:AF:DP:F1R2:F2R1:PGT:PID:PS:SB	0|0:27,0:0.048:27:11,0:13,0:0|1:131363963_T_C:131363963:17,10,0,0	0|1:26,2:0.125:28:5,2:20,0:0|1:131363963_T_C:131363963:17,9,1,1	RY1114T6	chr1_131363967_T>TGC	27	0	26	2	intron_variant	MODIFIER	Srgap2	.	indel	.	.	1	.
chr1	131363968	.	A	T	.	clustered_events;haplotype	AS_FilterStatus=SITE;AS_SB_TABLE=34,19|1,1;DP=55;ECNT=9;GERMQ=93;MBQ=20,37;MFRL=160,117;MMQ=60,52;MPOS=42;NALOD=1.30;NLOD=5.72;POPAF=6.00;TLOD=5.27;ANN=T|intron_variant|MODIFIER|Srgap2|ENSMUSG00000026425|transcript|ENSMUST00000097588|protein_coding|5/22|c.486+34T>A||||||	GT:AD:AF:DP:F1R2:F2R1:PGT:PID:PS:SB	0|0:27,0:0.048:27:10,0:14,0:0|1:131363963_T_C:131363963:17,10,0,0	0|1:26,2:0.125:28:5,2:20,0:0|1:131363963_T_C:131363963:17,9,1,1	RY1114T6	chr1_131363968_A>T	27	0	26	2	intron_variant	MODIFIER	Srgap2	.	snv	A>T	A:T>T:A	1	.
chr1	131363970	.	GA	G	.	clustered_events;haplotype;weak_evidence	AS_FilterStatus=weak_evidence;AS_SB_TABLE=34,21|1,1;DP=57;ECNT=9;GERMQ=81;MBQ=20,38;MFRL=160,117;MMQ=60,52;MPOS=42;NALOD=1.30;NLOD=5.72;POPAF=6.00;TLOD=5.27;ANN=G|intron_variant|MODIFIER|Srgap2|ENSMUSG00000026425|transcript|ENSMUST00000097588|protein_coding|5/22|c.486+31delT||||||	GT:AD:AF:DP:F1R2:F2R1:PGT:PID:PS:SB	0|0:29,0:0.048:29:12,0:14,0:0|1:131363963_T_C:131363963:17,12,0,0	0|1:26,2:0.125:28:5,2:20,0:0|1:131363963_T_C:131363963:17,9,1,1	RY1114T6	chr1_131363970_GA>G	29	0	26	2	intron_variant	MODIFIER	Srgap2	.	indel	.	.	1	.
chr1	131363973	.	A	T	.	clustered_events;haplotype	AS_FilterStatus=SITE;AS_SB_TABLE=33,24|1,1;DP=59;ECNT=9;GERMQ=93;MBQ=20,36;MFRL=160,117;MMQ=60,52;MPOS=42;NALOD=1.30;NLOD=5.72;POPAF=6.00;TLOD=5.22;ANN=T|intron_variant|MODIFIER|Srgap2|ENSMUSG00000026425|transcript|ENSMUST00000097588|protein_coding|5/22|c.486+29T>A||||||	GT:AD:AF:DP:F1R2:F2R1:PGT:PID:PS:SB	0|0:30,0:0.048:30:12,0:16,0:0|1:131363963_T_C:131363963:16,14,0,0	0|1:27,2:0.120:29:5,2:20,0:0|1:131363963_T_C:131363963:17,10,1,1	RY1114T6	chr1_131363973_A>T	30	0	27	2	intron_variant	MODIFIER	Srgap2	.	snv	A>T	A:T>T:A	1	.
chr1	131363983	.	G	A	.	clustered_events;haplotype	AS_FilterStatus=SITE;AS_SB_TABLE=35,26|1,1;DP=63;ECNT=9;GERMQ=93;MBQ=20,38;MFRL=159,117;MMQ=60,52;MPOS=35;NALOD=1.32;NLOD=6.02;POPAF=6.00;TLOD=5.16;ANN=A|intron_variant|MODIFIER|Srgap2|ENSMUSG00000026425|transcript|ENSMUST00000097588|protein_coding|5/22|c.486+19C>T||||||	GT:AD:AF:DP:F1R2:F2R1:PGT:PID:PS:SB	0|0:32,0:0.045:32:13,0:19,0:0|1:131363963_T_C:131363963:17,15,0,0	0|1:29,2:0.115:31:6,2:22,0:0|1:131363963_T_C:131363963:18,11,1,1	RY1114T6	chr1_131363983_G>A	32	0	29	2	intron_variant	MODIFIER	Srgap2	.	snv	G>A	G:C>A:T	1	.
chr1	131363987	.	G	A	.	clustered_events;haplotype	AS_FilterStatus=SITE;AS_SB_TABLE=34,26|1,1;DP=63;ECNT=9;GERMQ=93;MBQ=20,36;MFRL=158,117;MMQ=60,52;MPOS=31;NALOD=1.33;NLOD=6.02;POPAF=6.00;TLOD=5.16;ANN=A|intron_variant|MODIFIER|Srgap2|ENSMUSG00000026425|transcript|ENSMUST00000097588|protein_coding|5/22|c.486+15C>T||||||	GT:AD:AF:DP:F1R2:F2R1:PGT:PID:PS:SB	0|0:32,0:0.045:32:13,0:18,0:0|1:131363963_T_C:131363963:17,15,0,0	0|1:28,2:0.115:30:5,2:20,0:0|1:131363963_T_C:131363963:17,11,1,1	RY1114T6	chr1_131363987_G>A	32	0	28	2	intron_variant	MODIFIER	Srgap2	.	snv	G>A	G:C>A:T	1	.
chr1	131600136	.	G	C	.	clustered_events;haplotype	AS_FilterStatus=SITE;AS_SB_TABLE=15,17|1,1;DP=35;ECNT=9;GERMQ=69;MBQ=36,20;MFRL=161,156;MMQ=60,60;MPOS=23;NALOD=1.06;NLOD=3.01;POPAF=6.00;TLOD=6.38;ANN=C|synonymous_variant|LOW|Avpr1b|ENSMUSG00000026432|transcript|ENSMUST00000027690|protein_coding|1/2|c.396G>C|p.Arg132Arg|898/4023|396/1266|132/421||	GT:AD:AF:DP:F1R2:F2R1:PGT:PID:PS:SB	0|0:11,0:0.081:11:8,0:3,0:0|1:131600136_G_C:131600136:6,5,0,0	0|1:21,2:0.091:23:10,2:11,0:0|1:131600136_G_C:131600136:9,12,1,1	RY1114T6	chr1_131600136_G>C	11	0	21	2	synonymous_variant	LOW	Avpr1b	.	snv	G>C	G:C>C:G	1	.
chr1	131600157	.	T	C	.	clustered_events;haplotype	AS_FilterStatus=SITE;AS_SB_TABLE=15,15|1,1;DP=32;ECNT=9;GERMQ=66;MBQ=37,20;MFRL=160,156;MMQ=60,60;MPOS=23;NALOD=1.04;NLOD=3.01;POPAF=6.00;TLOD=6.47;ANN=C|synonymous_variant|LOW|Avpr1b|ENSMUSG00000026432|transcript|ENSMUST00000027690|protein_coding|1/2|c.417T>C|p.Pro139Pro|919/4023|417/1266|139/421||	GT:AD:AF:DP:F1R2:F2R1:PGT:PID:PS:SB	0|0:10,0:0.083:10:6,0:3,0:0|1:131600136_G_C:131600136:6,4,0,0	0|1:20,2:0.100:22:8,2:12,0:0|1:131600136_G_C:131600136:9,11,1,1	RY1114T6	chr1_131600157_T>C	10	0	20	2	synonymous_variant	LOW	Avpr1b	.	snv	T>C	A:T>G:C	1	.
chr1	131600160	.	T	G	.	clustered_events;haplotype	AS_FilterStatus=SITE;AS_SB_TABLE=15,16|1,1;DP=33;ECNT=9;GERMQ=66;MBQ=35,20;MFRL=154,156;MMQ=60,60;MPOS=23;NALOD=1.04;NLOD=3.01;POPAF=6.00;TLOD=6.47;ANN=G|synonymous_variant|LOW|Avpr1b|ENSMUSG00000026432|transcript|ENSMUST00000027690|protein_coding|1/2|c.420T>G|p.Leu140Leu|922/4023|420/1266|140/421||	GT:AD:AF:DP:F1R2:F2R1:PGT:PID:PS:SB	0|0:11,0:0.083:11:7,0:3,0:0|1:131600136_G_C:131600136:6,5,0,0	0|1:20,2:0.100:22:7,2:12,0:0|1:131600136_G_C:131600136:9,11,1,1	RY1114T6	chr1_131600160_T>G	11	0	20	2	synonymous_variant	LOW	Avpr1b	.	snv	T>G	A:T>C:G	1	.
chr1	131600163	.	A	C	.	clustered_events;haplotype	AS_FilterStatus=SITE;AS_SB_TABLE=17,14|1,1;DP=33;ECNT=9;GERMQ=66;MBQ=35,20;MFRL=152,156;MMQ=60,60;MPOS=23;NALOD=1.08;NLOD=3.31;POPAF=6.00;TLOD=6.51;ANN=C|synonymous_variant|LOW|Avpr1b|ENSMUSG00000026432|transcript|ENSMUST00000027690|protein_coding|1/2|c.423A>C|p.Arg141Arg|925/4023|423/1266|141/421||	GT:AD:AF:DP:F1R2:F2R1:PGT:PID:PS:SB	0|0:12,0:0.077:12:7,0:3,0:0|1:131600136_G_C:131600136:7,5,0,0	0|1:19,2:0.105:21:7,2:12,0:0|1:131600136_G_C:131600136:10,9,1,1	RY1114T6	chr1_131600163_A>C	12	0	19	2	synonymous_variant	LOW	Avpr1b	.	snv	A>C	A:T>C:G	1	.
chr1	131600178	.	CA	AG	.	clustered_events;haplotype	AS_FilterStatus=SITE;AS_SB_TABLE=19,13|1,1;DP=34;ECNT=9;GERMQ=61;MBQ=35,38;MFRL=152,142;MMQ=60,60;MPOS=45;NALOD=1.04;NLOD=3.01;POPAF=6.00;TLOD=10.04;ANN=AG|missense_variant|MODERATE|Avpr1b|ENSMUSG00000026432|transcript|ENSMUST00000027690|protein_coding|1/2|c.438_439delCAinsAG|p.Ser147Gly|940/4023|438/1266|146/421||	GT:AD:AF:DP:F1R2:F2R1:PGT:PID:PS:SB	0|0:14,0:0.083:14:8,0:5,0:0|1:131600136_G_C:131600136:8,6,0,0	0|1:18,2:0.150:20:7,1:10,0:0|1:131600136_G_C:131600136:11,7,1,1	RY1114T6	chr1_131600178_CA>AG	14	0	18	2	missense_variant	MODERATE	Avpr1b	.	indel	.	.	1	.
chr1	131600194	.	C	CTG	.	clustered_events;haplotype	AS_FilterStatus=SITE;AS_SB_TABLE=23,17|1,1;DP=42;ECNT=9;GERMQ=49;MBQ=22,34;MFRL=152,142;MMQ=60,60;MPOS=22;NALOD=1.08;NLOD=3.31;POPAF=6.00;TLOD=9.84;ANN=CTG|frameshift_variant|HIGH|Avpr1b|ENSMUSG00000026432|transcript|ENSMUST00000027690|protein_coding|1/2|c.454_455insTG|p.Pro152fs|957/4023|455/1266|152/421||;LOF=(Avpr1b|ENSMUSG00000026432|1|1.00)	GT:AD:AF:DP:F1R2:F2R1:PGT:PID:PS:SB	0|0:15,0:0.077:15:9,0:5,0:0|1:131600136_G_C:131600136:8,7,0,0	0|1:25,2:0.130:27:10,2:12,0:0|1:131600136_G_C:131600136:15,10,1,1	RY1114T6	chr1_131600194_C>CTG	15	0	25	2	frameshift_variant	HIGH	Avpr1b	.	indel	.	.	1	.
chr1	131600197	.	CTT	C	.	clustered_events;haplotype	AS_FilterStatus=SITE;AS_SB_TABLE=23,19|1,1;DP=44;ECNT=9;GERMQ=52;MBQ=20,28;MFRL=152,142;MMQ=60,60;MPOS=22;NALOD=1.08;NLOD=3.31;POPAF=6.00;TLOD=9.84;ANN=C|frameshift_variant|HIGH|Avpr1b|ENSMUSG00000026432|transcript|ENSMUST00000027690|protein_coding|1/2|c.458_459delTT|p.Leu153fs|960/4023|458/1266|153/421||;LOF=(Avpr1b|ENSMUSG00000026432|1|1.00)	GT:AD:AF:DP:F1R2:F2R1:PGT:PID:PS:SB	0|0:16,0:0.077:16:9,0:6,0:0|1:131600136_G_C:131600136:8,8,0,0	0|1:26,2:0.130:28:12,1:13,0:0|1:131600136_G_C:131600136:15,11,1,1	RY1114T6	chr1_131600197_CTT>C	16	0	26	2	frameshift_variant	HIGH	Avpr1b	.	indel	.	.	1	.
chr1	131600202	.	T	C	.	clustered_events;haplotype	AS_FilterStatus=SITE;AS_SB_TABLE=25,19|1,1;DP=46;ECNT=9;GERMQ=90;MBQ=20,34;MFRL=150,142;MMQ=60,60;MPOS=22;NALOD=1.08;NLOD=3.31;POPAF=6.00;TLOD=9.77;ANN=C|synonymous_variant|LOW|Avpr1b|ENSMUSG00000026432|transcript|ENSMUST00000027690|protein_coding|1/2|c.462T>C|p.Ile154Ile|964/4023|462/1266|154/421||	GT:AD:AF:DP:F1R2:F2R1:PGT:PID:PS:SB	0|0:16,0:0.077:16:9,0:7,0:0|1:131600136_G_C:131600136:9,7,0,0	0|1:28,2:0.125:30:12,2:13,0:0|1:131600136_G_C:131600136:16,12,1,1	RY1114T6	chr1_131600202_T>C	16	0	28	2	synonymous_variant	LOW	Avpr1b	.	snv	T>C	A:T>G:C	1	.
chr1	131600223	.	T	C	.	clustered_events;haplotype	AS_FilterStatus=SITE;AS_SB_TABLE=24,20|1,1;DP=46;ECNT=9;GERMQ=93;MBQ=20,33;MFRL=146,142;MMQ=60,60;MPOS=22;NALOD=1.15;NLOD=3.91;POPAF=6.00;TLOD=9.84;ANN=C|synonymous_variant|LOW|Avpr1b|ENSMUSG00000026432|transcript|ENSMUST00000027690|protein_coding|1/2|c.483T>C|p.Ala161Ala|985/4023|483/1266|161/421||	GT:AD:AF:DP:F1R2:F2R1:PGT:PID:PS:SB	0|0:17,0:0.067:17:6,0:9,0:0|1:131600136_G_C:131600136:9,8,0,0	0|1:27,2:0.130:29:12,2:15,0:0|1:131600136_G_C:131600136:15,12,1,1	RY1114T6	chr1_131600223_T>C	17	0	27	2	synonymous_variant	LOW	Avpr1b	.	snv	T>C	A:T>G:C	1	.
chr1	131758886	.	C	T	.	weak_evidence	AS_FilterStatus=weak_evidence;AS_SB_TABLE=4,13|1,1;DP=19;ECNT=1;GERMQ=27;MBQ=37,20;MFRL=163,105;MMQ=60,60;MPOS=44;NALOD=0.954;NLOD=2.41;POPAF=6.00;TLOD=3.20;ANN=T|intron_variant|MODIFIER|Slc26a9|ENSMUSG00000042268|transcript|ENSMUST00000049027|protein_coding|11/20|c.1293+50C>T||||||	GT:AD:AF:DP:F1R2:F2R1:SB	0/0:10,0:0.100:10:2,0:8,0:2,8,0,0	0/1:7,2:0.222:9:4,0:3,2:2,5,1,1	RY1114T6	chr1_131758886_C>T	10	0	7	2	intron_variant	MODIFIER	Slc26a9	.	snv	C>T	G:C>A:T	1	.
chr1	131867864	.	C	A	.	weak_evidence	AS_FilterStatus=weak_evidence;AS_SB_TABLE=1,9|0,0;DP=11;ECNT=1;GERMQ=20;MBQ=36,33;MFRL=157,195;MMQ=60,60;MPOS=11;NALOD=1.000;NLOD=2.71;POPAF=6.00;TLOD=3.48;ANN=A|intron_variant|MODIFIER|Rab7l1|ENSMUSG00000026433|transcript|ENSMUST00000027693|protein_coding|2/5|c.124+89C>A||||||	GT:AD:AF:DP:F1R2:F2R1:SB	0/0:10,0:0.091:10:2,0:8,0:1,9,0,0	0/1:0,1:0.667:1:0,1:0,0:0,0,0,1	RY1114T6	chr1_131867864_C>A	10	0	0	1	intron_variant	MODIFIER	Rab7l1	.	snv	C>A	G:C>T:A	1	.
chr1	132229326	.	GCGAGGTTCCGGCCTTCCGTGAGGAGT	G	.	weak_evidence	AS_FilterStatus=weak_evidence;AS_SB_TABLE=66,52|1,1;DP=149;ECNT=1;GERMQ=93;MBQ=34,20;MFRL=155,139;MMQ=60,60;MPOS=41;NALOD=1.66;NLOD=12.01;POPAF=6.00;TLOD=5.62;ANN=G|frameshift_variant|HIGH|Gm10188|ENSMUSG00000066936|transcript|ENSMUST00000086544|protein_coding|1/1|c.275_300delACTCCTCACGGAAGGCCGGAACCTCG|p.Asp92fs|441/720|275/408|92/135||,G|intron_variant|MODIFIER|Lemd1|ENSMUSG00000079330|transcrip…	GT:AD:AF:DP:F1R2:F2R1:SB	0/0:57,0:0.022:57:20,0:21,0:30,27,0,0	0/1:61,2:0.040:63:17,0:28,2:36,25,1,1	RY1114T6	chr1_132229326_GCGAGGTTCCGGCCTTCCGTGAGGAGT>G	57	0	61	2	frameshift_variant	HIGH	Gm10188	.	indel	.	.	1	.
chr1	132996545	.	G	T	.	PASS	AS_FilterStatus=SITE;AS_SB_TABLE=75,44|5,4;DP=129;ECNT=1;GERMQ=93;MBQ=20,29;MFRL=147,164;MMQ=60,60;MPOS=22;NALOD=1.67;NLOD=13.85;POPAF=6.00;TLOD=19.57;ANN=T|intron_variant|MODIFIER|Mdm4|ENSMUSG00000054387|transcript|ENSMUST00000067398|protein_coding|9/10|c.822+18C>A||||||	GT:AD:AF:DP:F1R2:F2R1:SB	0/0:67,0:0.021:67:29,0:38,0:42,25,0,0	0/1:52,9:0.166:61:12,3:40,6:33,19,5,4	RY1114T6	chr1_132996545_G>T	67	0	52	9	intron_variant	MODIFIER	Mdm4	PASS	snv	G>T	G:C>T:A	1	PASS
chr1	133148288	.	C	T	.	weak_evidence	AS_FilterStatus=weak_evidence;AS_SB_TABLE=8,15|1,1;DP=25;ECNT=1;GERMQ=36;MBQ=20,20;MFRL=170,151;MMQ=60,60;MPOS=25;NALOD=1.08;NLOD=3.31;POPAF=6.00;TLOD=3.22;ANN=T|intergenic_region|MODIFIER|Ppp1r15b-Plekha6|ENSMUSG00000046062-ENSMUSG00000041757|intergenic_region|ENSMUSG00000046062-ENSMUSG00000041757|||n.133148288C>T||||||	GT:AD:AF:DP:F1R2:F2R1:SB	0/0:16,0:0.077:16:10,0:6,0:6,10,0,0	0/1:7,2:0.250:9:5,0:2,2:2,5,1,1	RY1114T6	chr1_133148288_C>T	16	0	7	2	intergenic_region	MODIFIER	Ppp1r15b-Plekha6	.	snv	C>T	G:C>A:T	1	.
chr1	134303532	.	TACAC	T	.	germline;weak_evidence	AS_FilterStatus=weak_evidence;AS_SB_TABLE=13,5|2,1;DP=25;ECNT=1;GERMQ=1;MBQ=36,38;MFRL=161,146;MMQ=60,60;MPOS=19;NALOD=0.615;NLOD=2.69;POPAF=6.00;RPA=18,16;RU=AC;STR;STRQ=93;TLOD=5.40;ANN=T|intron_variant|MODIFIER|Ppfia4|ENSMUSG00000026458|transcript|ENSMUST00000168515|protein_coding|25/28|c.3258+69_3258+72delGTGT||||||	GT:AD:AF:DP:F1R2:F2R1:SB	0/0:12,0:0.088:12:5,0:4,0:8,4,0,0	0/1:6,3:0.298:9:3,1:3,1:5,1,2,1	RY1114T6	chr1_134303532_TACAC>T	12	0	6	3	intron_variant	MODIFIER	Ppfia4	.	indel	.	.	1	.
chr1	134347996	.	CA	TG	.	clustered_events;haplotype;normal_artifact	AS_FilterStatus=SITE;AS_SB_TABLE=69,28|2,1;DP=100;ECNT=7;GERMQ=93;MBQ=34,36;MFRL=156,100;MMQ=60,60;MPOS=32;NALOD=-5.829e+00;NLOD=2.44;POPAF=6.00;TLOD=5.79;ANN=TG|3_prime_UTR_variant|MODIFIER|Tmem183a|ENSMUSG00000042305|transcript|ENSMUST00000049470|protein_coding|8/8|c.*12_*13delTGinsCA|||||12|	GT:AD:AF:DP:F1R2:F2R1:PGT:PID:PS:SB	0|0:45,1:0.050:46:12,0:33,0:0|1:134347996_CA_TG:134347996:31,14,1,0	0|1:52,2:0.048:54:17,0:32,1:0|1:134347996_CA_TG:134347996:38,14,1,1	RY1114T6	chr1_134347996_CA>TG	45	1	52	2	3_prime_UTR_variant	MODIFIER	Tmem183a	.	indel	.	.	1	.
chr1	134348006	.	G	T	.	clustered_events;haplotype;normal_artifact	AS_FilterStatus=SITE;AS_SB_TABLE=76,34|1,2;DP=113;ECNT=7;GERMQ=93;MBQ=32,35;MFRL=153,100;MMQ=60,60;MPOS=9;NALOD=-5.785e+00;NLOD=3.04;POPAF=6.00;TLOD=5.67;ANN=T|3_prime_UTR_variant|MODIFIER|Tmem183a|ENSMUSG00000042305|transcript|ENSMUST00000049470|protein_coding|8/8|c.*3C>A|||||3|	GT:AD:AF:DP:F1R2:F2R1:PGT:PID:PS:SB	0|0:50,1:0.048:51:12,0:36,1:0|1:134347996_CA_TG:134347996:32,18,0,1	0|1:60,2:0.042:62:19,0:40,2:0|1:134347996_CA_TG:134347996:44,16,1,1	RY1114T6	chr1_134348006_G>T	50	1	60	2	3_prime_UTR_variant	MODIFIER	Tmem183a	.	snv	G>T	G:C>T:A	1	.
chr1	134348012	.	T	C	.	clustered_events;haplotype;normal_artifact	AS_FilterStatus=SITE;AS_SB_TABLE=78,36|1,2;DP=119;ECNT=7;GERMQ=93;MBQ=20,32;MFRL=153,100;MMQ=60,60;MPOS=15;NALOD=-5.764e+00;NLOD=3.34;POPAF=6.00;TLOD=5.63;ANN=C|synonymous_variant|LOW|Tmem183a|ENSMUSG00000042305|transcript|ENSMUST00000049470|protein_coding|8/8|c.1125A>G|p.Ala375Ala|1254/3169|1125/1128|375/375||	GT:AD:AF:DP:F1R2:F2R1:PGT:PID:PS:SB	0|0:52,1:0.047:53:15,0:37,1:0|1:134347996_CA_TG:134347996:34,18,0,1	0|1:62,2:0.040:64:19,0:42,2:0|1:134347996_CA_TG:134347996:44,18,1,1	RY1114T6	chr1_134348012_T>C	52	1	62	2	synonymous_variant	LOW	Tmem183a	.	snv	T>C	A:T>G:C	1	.
chr1	134348030	.	A	G	.	clustered_events;haplotype;normal_artifact	AS_FilterStatus=SITE;AS_SB_TABLE=83,51|2,2;DP=139;ECNT=7;GERMQ=93;MBQ=25,36;MFRL=154,113;MMQ=60,60;MPOS=32;NALOD=-1.125e+00;NLOD=9.95;POPAF=6.00;TLOD=8.58;ANN=G|synonymous_variant|LOW|Tmem183a|ENSMUSG00000042305|transcript|ENSMUST00000049470|protein_coding|8/8|c.1107T>C|p.Tyr369Tyr|1236/3169|1107/1128|369/375||	GT:AD:AF:DP:F1R2:F2R1:PGT:PID:PS:SB	0|0:63,1:0.040:64:18,0:44,1:0|1:134348030_A_G:134348030:38,25,0,1	0|1:71,3:0.053:74:28,0:43,3:0|1:134348030_A_G:134348030:45,26,2,1	RY1114T6	chr1_134348030_A>G	63	1	71	3	synonymous_variant	LOW	Tmem183a	.	snv	A>G	A:T>G:C	1	.
chr1	134348036	.	C	A	.	clustered_events;haplotype;normal_artifact	AS_FilterStatus=SITE;AS_SB_TABLE=85,52|2,2;DP=143;ECNT=7;GERMQ=93;MBQ=20,38;MFRL=154,113;MMQ=60,60;MPOS=32;NALOD=-1.103e+00;NLOD=10.25;POPAF=6.00;TLOD=8.55;ANN=A|synonymous_variant|LOW|Tmem183a|ENSMUSG00000042305|transcript|ENSMUST00000049470|protein_coding|8/8|c.1101G>T|p.Pro367Pro|1230/3169|1101/1128|367/375||	GT:AD:AF:DP:F1R2:F2R1:PGT:PID:PS:SB	0|0:65,1:0.039:66:20,0:43,1:0|1:134348030_A_G:134348030:40,25,0,1	0|1:72,3:0.052:75:28,0:42,3:0|1:134348030_A_G:134348030:45,27,2,1	RY1114T6	chr1_134348036_C>A	65	1	72	3	synonymous_variant	LOW	Tmem183a	.	snv	C>A	G:C>T:A	1	.
chr1	134348063	.	A	G	.	clustered_events;haplotype;normal_artifact	AS_FilterStatus=SITE;AS_SB_TABLE=85,69|3,3;DP=162;ECNT=7;GERMQ=93;MBQ=33,32;MFRL=155,125;MMQ=60,60;MPOS=28;NALOD=-4.034e+00;NLOD=8.16;POPAF=6.00;TLOD=12.04;ANN=G|synonymous_variant|LOW|Tmem183a|ENSMUSG00000042305|transcript|ENSMUST00000049470|protein_coding|8/8|c.1074T>C|p.Ser358Ser|1203/3169|1074/1128|358/375||	GT:AD:AF:DP:F1R2:F2R1:PGT:PID:PS:SB	0|0:70,2:0.051:72:23,1:45,1:0|1:134348063_A_G:134348063:39,31,1,1	0|1:84,4:0.045:88:30,0:51,4:0|1:134348063_A_G:134348063:46,38,2,2	RY1114T6	chr1_134348063_A>G	70	2	84	4	synonymous_variant	LOW	Tmem183a	.	snv	A>G	A:T>G:C	1	.
chr1	134348072	.	C	T	.	clustered_events;haplotype;normal_artifact	AS_FilterStatus=SITE;AS_SB_TABLE=88,73|2,3;DP=169;ECNT=7;GERMQ=93;MBQ=30,35;MFRL=154,125;MMQ=60,60;MPOS=28;NALOD=-3.989e+00;NLOD=8.76;POPAF=6.00;TLOD=11.93;ANN=T|synonymous_variant|LOW|Tmem183a|ENSMUSG00000042305|transcript|ENSMUST00000049470|protein_coding|8/8|c.1065G>A|p.Pro355Pro|1194/3169|1065/1128|355/375||	GT:AD:AF:DP:F1R2:F2R1:PGT:PID:PS:SB	0|0:73,2:0.049:75:26,1:46,1:0|1:134348063_A_G:134348063:39,34,1,1	0|1:88,3:0.041:91:31,0:53,3:0|1:134348063_A_G:134348063:49,39,1,2	RY1114T6	chr1_134348072_C>T	73	2	88	3	synonymous_variant	LOW	Tmem183a	.	snv	C>T	G:C>A:T	1	.
chr1	134467667	.	C	A	.	strand_bias;weak_evidence	AS_FilterStatus=weak_evidence,strand_bias;AS_SB_TABLE=99,49|0,2;DP=153;ECNT=1;GERMQ=93;MBQ=22,36;MFRL=159,184;MMQ=60,60;MPOS=22;NALOD=1.74;NLOD=16.25;POPAF=6.00;TLOD=3.14;ANN=A|stop_gained|HIGH|Klhl12|ENSMUSG00000026455|transcript|ENSMUST00000027725|protein_coding|4/12|c.366C>A|p.Cys122*|507/3408|366/1707|122/568||;LOF=(Klhl12|ENSMUSG00000026455|1|1.00);NMD=(Klhl12|ENSMUSG00000026455|1|1.00)	GT:AD:AF:DP:F1R2:F2R1:SB	0/0:73,0:0.018:73:35,0:38,0:49,24,0,0	0/1:75,2:0.049:77:19,0:56,2:50,25,0,2	RY1114T6	chr1_134467667_C>A	73	0	75	2	stop_gained	HIGH	Klhl12	.	snv	C>A	G:C>T:A	1	.
chr1	134489096	.	C	A	.	weak_evidence	AS_FilterStatus=weak_evidence;AS_SB_TABLE=67,95|1,1;DP=168;ECNT=1;GERMQ=93;MBQ=20,38;MFRL=149,173;MMQ=60,60;MPOS=12;NALOD=1.84;NLOD=20.16;POPAF=6.00;TLOD=3.50;ANN=A|synonymous_variant|LOW|Klhl12|ENSMUSG00000026455|transcript|ENSMUST00000027725|protein_coding|11/12|c.1555C>A|p.Arg519Arg|1696/3408|1555/1707|519/568||	GT:AD:AF:DP:F1R2:F2R1:SB	0/0:94,0:0.014:94:37,0:57,0:39,55,0,0	0/1:68,2:0.051:70:26,0:41,2:28,40,1,1	RY1114T6	chr1_134489096_C>A	94	0	68	2	synonymous_variant	LOW	Klhl12	.	snv	C>A	G:C>T:A	1	.
chr1	134887192	.	GCA	G	.	normal_artifact;slippage;weak_evidence	AS_FilterStatus=weak_evidence;AS_SB_TABLE=48,3|7,1;DP=65;ECNT=1;GERMQ=25;MBQ=30,30;MFRL=164,133;MMQ=60,60;MPOS=8;NALOD=-8.137e-01;NLOD=3.54;POPAF=6.00;RPA=15,14;RU=CA;STR;STRQ=1;TLOD=3.21;ANN=G|intron_variant|MODIFIER|Ppp1r12b|ENSMUSG00000073557|transcript|ENSMUST00000086444|protein_coding|7/23|c.1001+81_1001+82delTG||||||	GT:AD:AF:DP:F1R2:F2R1:SB	0/0:28,3:0.094:31:10,0:16,1:28,0,3,0	0/1:23,5:0.181:28:9,1:10,2:20,3,4,1	RY1114T6	chr1_134887192_GCA>G	28	3	23	5	intron_variant	MODIFIER	Ppp1r12b	.	indel	.	.	1	.
chr1	135841810	.	GGT	G	.	normal_artifact;slippage;weak_evidence	AS_FilterStatus=weak_evidence;AS_SB_TABLE=48,7|10,0;ECNT=1;GERMQ=20;MBQ=36,37;MFRL=170,170;MMQ=60,60;MPOS=24;NALOD=-8.062e-01;NLOD=3.64;POPAF=6.00;RPA=26,25;RU=GT;STR;STRQ=1;TLOD=7.81;CSQ=-|ENSMUSG00000026414|ENSMUST00000189826|Transcript|intron_variant||||||||1,-|ENSMUSG00000026414|ENSMUST00000178854|Transcript|intron_variant||||||||1,-|ENSMUSG00000026414|ENSMUST00000191055|Transcript|downstream…	GT:AD:AF:DP:F1R2:F2R1:SB	0/0:30,3:0.109:33:15,2:12,1:25,5,3,0	0/1:25,7:0.229:32:9,1:15,6:23,2,7,0	RY1114T6	chr1_135841810_GGT>G	30	3	25	7	intron_variant	MODIFIER	Tnnt2	.	indel	.	.	1	.
chr1	136087305	.	C	A	.	PASS	AS_FilterStatus=SITE;AS_SB_TABLE=63,22|3,1;DP=97;ECNT=1;GERMQ=93;MBQ=36,28;MFRL=145,151;MMQ=60,60;MPOS=21;NALOD=1.66;NLOD=13.24;POPAF=6.00;TLOD=7.85;ANN=A|intron_variant|MODIFIER|Cacna1s|ENSMUSG00000026407|transcript|ENSMUST00000112064|protein_coding|13/43|c.1949-19C>A||||||	GT:AD:AF:DP:F1R2:F2R1:SB	0/0:56,0:0.021:56:23,0:33,0:41,15,0,0	0/1:29,4:0.129:33:13,2:16,2:22,7,3,1	RY1114T6	chr1_136087305_C>A	56	0	29	4	intron_variant	MODIFIER	Cacna1s	PASS	snv	C>A	G:C>T:A	1	PASS
chr1	139490418	.	G	T	.	normal_artifact	AS_FilterStatus=SITE;AS_SB_TABLE=160,163|2,5;DP=336;ECNT=1;GERMQ=93;MBQ=20,20;MFRL=148,164;MMQ=60,60;MPOS=19;NALOD=0.191;NLOD=38.33;POPAF=6.00;TLOD=7.95;ANN=T|stop_gained|HIGH|Aspm|ENSMUSG00000033952|transcript|ENSMUST00000053364|protein_coding|25/28|c.8884G>T|p.Gly2962*|9041/9866|8884/9369|2962/3122||;LOF=(Aspm|ENSMUSG00000033952|1|1.00);NMD=(Aspm|ENSMUSG00000033952|1|1.00)	GT:AD:AF:DP:F1R2:F2R1:SB	0/0:190,2:0.014:192:47,0:143,2:100,90,1,1	0/1:133,5:0.046:138:43,2:89,3:60,73,1,4	RY1114T6	chr1_139490418_G>T	190	2	133	5	stop_gained	HIGH	Aspm	.	snv	G>T	G:C>T:A	1	.
chr1	140584074	.	C	A	.	normal_artifact;weak_evidence	AS_FilterStatus=weak_evidence;AS_SB_TABLE=47,60|2,1;DP=114;ECNT=1;GERMQ=93;MBQ=33,32;MFRL=152,151;MMQ=60,60;MPOS=34;NALOD=-1.352e+00;NLOD=6.64;POPAF=6.00;TLOD=3.89;ANN=A|missense_variant|MODERATE|Kcnt2|ENSMUSG00000052726|transcript|ENSMUST00000060201|protein_coding|26/28|c.2987C>A|p.Pro996Gln|3025/3535|2987/3429|996/1142||	GT:AD:AF:DP:F1R2:F2R1:SB	0/0:44,1:0.051:45:13,1:31,0:16,28,0,1	0/1:63,2:0.058:65:30,1:31,1:31,32,2,0	RY1114T6	chr1_140584074_C>A	44	1	63	2	missense_variant	MODERATE	Kcnt2	.	snv	C>A	G:C>T:A	1	.
chr1	150743517	rs252120329	TG	T	.	normal_artifact;slippage;weak_evidence	AS_FilterStatus=weak_evidence;AS_SB_TABLE=50,6|6,0;ECNT=1;GERMQ=49;MBQ=34,35;MFRL=166,157;MMQ=60,60;MPOS=14;NALOD=-1.059e+00;NLOD=3.82;POPAF=6.00;RPA=11,10;RU=G;STR;STRQ=1;TLOD=5.79;CSQ=-|ENSMUSG00000066842|ENSMUST00000137197|Transcript|intron_variant||||||||-1,-|ENSMUSG00000093650|ENSMUST00000177268|Transcript|intron_variant&non_coding_transcript_variant||||||||1,-|ENSMUSG00000066842|ENSMUST0000…	GT:AD:AF:DP:F1R2:F2R1:SB	0/0:29,2:0.093:31:11,0:15,2:27,2,2,0	0/1:27,4:0.156:31:9,1:18,3:23,4,4,0	RY1114T6	chr1_150743517_TG>T	29	2	27	4	intron_variant	MODIFIER	Hmcn1	.	indel	.	.	1	.
chr1	151363167	.	G	A	.	normal_artifact	AS_FilterStatus=SITE;AS_SB_TABLE=85,16|2,2;DP=108;ECNT=1;GERMQ=93;MBQ=36,26;MFRL=153,125;MMQ=60,60;MPOS=39;NALOD=-5.824e+00;NLOD=2.44;POPAF=6.00;TLOD=8.70;ANN=A|synonymous_variant|LOW|Ivns1abp|ENSMUSG00000023150|transcript|ENSMUST00000023918|protein_coding|15/15|c.1731G>A|p.Glu577Glu|2235/3513|1731/1929|577/642||,A|downstream_gene_variant|MODIFIER|Swt1|ENSMUSG00000052748|transcript|ENSMUST0000006…	GT:AD:AF:DP:F1R2:F2R1:SB	0/0:44,1:0.050:45:15,1:28,0:37,7,0,1	0/1:57,3:0.058:60:8,3:49,0:48,9,2,1	RY1114T6	chr1_151363167_G>A	44	1	57	3	synonymous_variant	LOW	Ivns1abp	.	snv	G>A	G:C>A:T	1	.
chr1	151407576	.	CTCT	C	.	weak_evidence	AS_FilterStatus=weak_evidence;AS_SB_TABLE=73,51|1,1;DP=130;ECNT=1;GERMQ=93;MBQ=20,20;MFRL=141,141;MMQ=60,60;MPOS=32;NALOD=1.67;NLOD=12.91;POPAF=6.00;TLOD=3.75;ANN=C|disruptive_inframe_deletion&splice_region_variant|MODERATE|Swt1|ENSMUSG00000052748|transcript|ENSMUST00000064771|protein_coding|7/20|c.1026_1028delAGA|p.Glu343del|1232/3688|1026/2724|342/907||	GT:AD:AF:DP:F1R2:F2R1:SB	0/0:61,0:0.021:61:23,0:36,0:36,25,0,0	0/1:63,2:0.043:65:16,0:44,2:37,26,1,1	RY1114T6	chr1_151407576_CTCT>C	61	0	63	2	disruptive_inframe_deletion&splice_region_variant	MODERATE	Swt1	.	indel	.	.	1	.
chr1	151433924	.	TACAC	T	.	weak_evidence	AS_FilterStatus=weak_evidence;AS_SB_TABLE=1,23|1,2;DP=52;ECNT=1;GERMQ=11;MBQ=29,36;MFRL=174,189;MMQ=60,60;MPOS=45;NALOD=1.05;NLOD=4.21;POPAF=6.00;RPA=18,16;RU=AC;STR;STRQ=93;TLOD=5.73;ANN=T|intron_variant|MODIFIER|Trmt1l|ENSMUSG00000053286|transcript|ENSMUST00000065625|protein_coding|2/14|c.337+54_337+57delCACA||||||INFO_REALIGN_3_PRIME	GT:AD:AF:DP:F1R2:F2R1:SB	0/0:15,0:0.052:15:5,0:9,0:1,14,0,0	0/1:9,3:0.283:12:1,1:6,2:0,9,1,2	RY1114T6	chr1_151433924_TACAC>T	15	0	9	3	intron_variant	MODIFIER	Trmt1l	PASS	indel	.	.	1	.
chr1	151448327	.	C	T	.	clustered_events;haplotype;strand_bias;weak_evidence	AS_FilterStatus=weak_evidence,strand_bias;AS_SB_TABLE=29,18|1,0;DP=50;ECNT=6;GERMQ=93;MBQ=34,36;MFRL=160,117;MMQ=60,60;MPOS=48;NALOD=1.46;NLOD=8.43;POPAF=6.00;TLOD=4.84;ANN=T|synonymous_variant|LOW|Trmt1l|ENSMUSG00000053286|transcript|ENSMUST00000065625|protein_coding|8/15|c.924C>T|p.Asn308Asn|1153/2664|924/2187|308/728||	GT:AD:AF:DP:F1R2:F2R1:PGT:PID:PS:SB	0|0:36,0:0.033:36:18,0:18,0:0|1:151448327_C_T:151448327:20,16,0,0	0|1:11,1:0.167:12:1,1:10,0:0|1:151448327_C_T:151448327:9,2,1,0	RY1114T6	chr1_151448327_C>T	36	0	11	1	synonymous_variant	LOW	Trmt1l	.	snv	C>T	G:C>A:T	1	.
chr1	151448336	.	TT	AC	.	clustered_events;haplotype;strand_bias;weak_evidence	AS_FilterStatus=weak_evidence,strand_bias;AS_SB_TABLE=32,18|1,0;DP=51;ECNT=6;GERMQ=93;MBQ=35,38;MFRL=157,117;MMQ=60,60;MPOS=43;NALOD=1.51;NLOD=9.33;POPAF=6.00;TLOD=4.84;ANN=AC|synonymous_variant|LOW|Trmt1l|ENSMUSG00000053286|transcript|ENSMUST00000065625|protein_coding|8/15|c.933_934delTTinsAC|p.313|1162/2664|933/2187|311/728||	GT:AD:AF:DP:F1R2:F2R1:PGT:PID:PS:SB	0|0:38,0:0.030:38:17,0:18,0:0|1:151448327_C_T:151448327:23,15,0,0	0|1:12,1:0.167:13:1,1:11,0:0|1:151448327_C_T:151448327:9,3,1,0	RY1114T6	chr1_151448336_TT>AC	38	0	12	1	synonymous_variant	LOW	Trmt1l	.	indel	.	.	1	.
chr1	151448346	.	A	G	.	clustered_events;haplotype;weak_evidence	AS_FilterStatus=weak_evidence;AS_SB_TABLE=33,22|1,1;DP=58;ECNT=6;GERMQ=93;MBQ=34,20;MFRL=151,117;MMQ=60,51;MPOS=19;NALOD=1.53;NLOD=9.93;POPAF=6.00;TLOD=4.67;ANN=G|missense_variant|MODERATE|Trmt1l|ENSMUSG00000053286|transcript|ENSMUST00000065625|protein_coding|8/15|c.943A>G|p.Lys315Glu|1172/2664|943/2187|315/728||	GT:AD:AF:DP:F1R2:F2R1:PGT:PID:PS:SB	0|0:41,0:0.029:41:19,0:22,0:0|1:151448327_C_T:151448327:23,18,0,0	0|1:14,2:0.141:16:4,2:10,0:0|1:151448327_C_T:151448327:10,4,1,1	RY1114T6	chr1_151448346_A>G	41	0	14	2	missense_variant	MODERATE	Trmt1l	.	snv	A>G	A:T>G:C	1	.
chr1	151448357	.	C	T	.	clustered_events;haplotype	AS_FilterStatus=SITE;AS_SB_TABLE=38,27|1,1;DP=67;ECNT=6;GERMQ=93;MBQ=33,20;MFRL=150,117;MMQ=60,51;MPOS=19;NALOD=1.58;NLOD=11.14;POPAF=6.00;TLOD=6.57;ANN=T|synonymous_variant|LOW|Trmt1l|ENSMUSG00000053286|transcript|ENSMUST00000065625|protein_coding|8/15|c.954C>T|p.His318His|1183/2664|954/2187|318/728||	GT:AD:AF:DP:F1R2:F2R1:PGT:PID:PS:SB	0|0:45,0:0.026:45:19,0:23,0:0|1:151448357_C_T:151448357:24,21,0,0	0|1:20,2:0.111:22:5,2:15,0:0|1:151448357_C_T:151448357:14,6,1,1	RY1114T6	chr1_151448357_C>T	45	0	20	2	synonymous_variant	LOW	Trmt1l	.	snv	C>T	G:C>A:T	1	.
chr1	151448366	.	G	A	.	clustered_events;haplotype	AS_FilterStatus=SITE;AS_SB_TABLE=43,32|1,1;DP=77;ECNT=6;GERMQ=93;MBQ=30,20;MFRL=150,117;MMQ=60,51;MPOS=19;NALOD=1.62;NLOD=12.34;POPAF=6.00;TLOD=6.47;ANN=A|synonymous_variant|LOW|Trmt1l|ENSMUSG00000053286|transcript|ENSMUST00000065625|protein_coding|8/15|c.963G>A|p.Lys321Lys|1192/2664|963/2187|321/728||	GT:AD:AF:DP:F1R2:F2R1:PGT:PID:PS:SB	0|0:51,0:0.023:51:20,0:27,0:0|1:151448357_C_T:151448357:27,24,0,0	0|1:24,2:0.100:26:6,2:17,0:0|1:151448357_C_T:151448357:16,8,1,1	RY1114T6	chr1_151448366_G>A	51	0	24	2	synonymous_variant	LOW	Trmt1l	.	snv	G>A	G:C>A:T	1	.
chr1	151448369	.	A	G	.	clustered_events;haplotype	AS_FilterStatus=SITE;AS_SB_TABLE=46,31|1,1;DP=79;ECNT=6;GERMQ=93;MBQ=27,20;MFRL=150,117;MMQ=60,51;MPOS=19;NALOD=1.62;NLOD=12.34;POPAF=6.00;TLOD=6.42;ANN=G|synonymous_variant|LOW|Trmt1l|ENSMUSG00000053286|transcript|ENSMUST00000065625|protein_coding|8/15|c.966A>G|p.Leu322Leu|1195/2664|966/2187|322/728||	GT:AD:AF:DP:F1R2:F2R1:PGT:PID:PS:SB	0|0:51,0:0.023:51:22,0:26,0:0|1:151448357_C_T:151448357:29,22,0,0	0|1:26,2:0.095:28:6,2:18,0:0|1:151448357_C_T:151448357:17,9,1,1	RY1114T6	chr1_151448369_A>G	51	0	26	2	synonymous_variant	LOW	Trmt1l	.	snv	A>G	A:T>G:C	1	.
chr1	154205260	.	A	G	.	clustered_events;haplotype	AS_FilterStatus=SITE;AS_SB_TABLE=22,9|1,1;DP=33;ECNT=5;GERMQ=60;MBQ=33,28;MFRL=164,183;MMQ=60,60;MPOS=39;NALOD=1.000;NLOD=2.71;POPAF=6.00;TLOD=5.61;ANN=G|synonymous_variant|LOW|Zfp648|ENSMUSG00000066797|transcript|ENSMUST00000086195|protein_coding|2/2|c.1164A>G|p.Lys388Lys|1463/1877|1164/1578|388/525||	GT:AD:AF:DP:F1R2:F2R1:PGT:PID:PS:SB	0|0:12,0:0.091:12:6,0:6,0:0|1:154205260_A_G:154205260:8,4,0,0	0|1:19,2:0.158:21:7,1:12,1:0|1:154205260_A_G:154205260:14,5,1,1	RY1114T6	chr1_154205260_A>G	12	0	19	2	synonymous_variant	LOW	Zfp648	.	snv	A>G	A:T>G:C	1	.
chr1	154205266	.	T	C	.	clustered_events;haplotype	AS_FilterStatus=SITE;AS_SB_TABLE=21,13|1,1;DP=36;ECNT=5;GERMQ=63;MBQ=35,29;MFRL=164,183;MMQ=60,60;MPOS=33;NALOD=1.000;NLOD=2.71;POPAF=6.00;TLOD=5.54;ANN=C|synonymous_variant|LOW|Zfp648|ENSMUSG00000066797|transcript|ENSMUST00000086195|protein_coding|2/2|c.1170T>C|p.Ser390Ser|1469/1877|1170/1578|390/525||	GT:AD:AF:DP:F1R2:F2R1:PGT:PID:PS:SB	0|0:14,0:0.091:14:7,0:6,0:0|1:154205260_A_G:154205260:8,6,0,0	0|1:20,2:0.150:22:8,1:10,1:0|1:154205260_A_G:154205260:13,7,1,1	RY1114T6	chr1_154205266_T>C	14	0	20	2	synonymous_variant	LOW	Zfp648	.	snv	T>C	A:T>G:C	1	.
chr1	154205269	.	C	T	.	clustered_events;haplotype	AS_FilterStatus=SITE;AS_SB_TABLE=20,13|1,1;DP=35;ECNT=5;GERMQ=63;MBQ=35,29;MFRL=164,183;MMQ=60,60;MPOS=30;NALOD=1.000;NLOD=2.71;POPAF=6.00;TLOD=5.54;ANN=T|synonymous_variant|LOW|Zfp648|ENSMUSG00000066797|transcript|ENSMUST00000086195|protein_coding|2/2|c.1173C>T|p.Asn391Asn|1472/1877|1173/1578|391/525||	GT:AD:AF:DP:F1R2:F2R1:PGT:PID:PS:SB	0|0:13,0:0.091:13:5,0:7,0:0|1:154205260_A_G:154205260:7,6,0,0	0|1:20,2:0.150:22:10,1:10,1:0|1:154205260_A_G:154205260:13,7,1,1	RY1114T6	chr1_154205269_C>T	13	0	20	2	synonymous_variant	LOW	Zfp648	.	snv	C>T	G:C>A:T	1	.
chr1	154205272	.	G	GTC	.	clustered_events;haplotype;weak_evidence	AS_FilterStatus=weak_evidence;AS_SB_TABLE=20,13|1,1;DP=35;ECNT=5;GERMQ=33;MBQ=37,28;MFRL=156,183;MMQ=60,60;MPOS=27;NALOD=1.04;NLOD=3.01;POPAF=6.00;TLOD=5.54;ANN=GTC|frameshift_variant|HIGH|Zfp648|ENSMUSG00000066797|transcript|ENSMUST00000086195|protein_coding|2/2|c.1176_1177insTC|p.Gln393fs|1476/1877|1177/1578|393/525||;LOF=(Zfp648|ENSMUSG00000066797|1|1.00)	GT:AD:AF:DP:F1R2:F2R1:PGT:PID:PS:SB	0|0:13,0:0.083:13:5,0:7,0:0|1:154205260_A_G:154205260:7,6,0,0	0|1:20,2:0.150:22:10,1:10,1:0|1:154205260_A_G:154205260:13,7,1,1	RY1114T6	chr1_154205272_G>GTC	13	0	20	2	frameshift_variant	HIGH	Zfp648	.	indel	.	.	1	.
chr1	154205273	.	CAG	C	.	clustered_events;haplotype;weak_evidence	AS_FilterStatus=weak_evidence;AS_SB_TABLE=21,13|1,1;DP=36;ECNT=5;GERMQ=36;MBQ=36,26;MFRL=160,183;MMQ=60,60;MPOS=24;NALOD=1.08;NLOD=3.31;POPAF=6.00;TLOD=5.54;ANN=C|frameshift_variant|HIGH|Zfp648|ENSMUSG00000066797|transcript|ENSMUST00000086195|protein_coding|2/2|c.1178_1179delAG|p.Gln393fs|1477/1877|1178/1578|393/525||;LOF=(Zfp648|ENSMUSG00000066797|1|1.00)	GT:AD:AF:DP:F1R2:F2R1:PGT:PID:PS:SB	0|0:14,0:0.077:14:5,0:8,0:0|1:154205260_A_G:154205260:8,6,0,0	0|1:20,2:0.150:22:10,1:10,1:0|1:154205260_A_G:154205260:13,7,1,1	RY1114T6	chr1_154205273_CAG>C	14	0	20	2	frameshift_variant	HIGH	Zfp648	.	indel	.	.	1	.
chr1	155868732	.	G	T	.	PASS	AS_FilterStatus=SITE;AS_SB_TABLE=125,82|2,1;DP=220;ECNT=1;GERMQ=93;MBQ=20,35;MFRL=145,142;MMQ=60,60;MPOS=24;NALOD=1.89;NLOD=22.58;POPAF=6.00;TLOD=5.11;ANN=T|missense_variant|MODERATE|Cep350|ENSMUSG00000033671|transcript|ENSMUST00000138762|protein_coding|32/38|c.6340C>A|p.Gln2114Lys|6392/12937|6340/9288|2114/3095||	GT:AD:AF:DP:F1R2:F2R1:SB	0/0:108,0:0.013:108:40,0:68,0:62,46,0,0	0/1:99,3:0.049:102:26,0:73,3:63,36,2,1	RY1114T6	chr1_155868732_G>T	108	0	99	3	missense_variant	MODERATE	Cep350	PASS	snv	G>T	G:C>T:A	1	PASS
chr1	156079056	.	G	A	.	clustered_events	AS_FilterStatus=SITE;AS_SB_TABLE=19,19|1,1;DP=40;ECNT=9;GERMQ=80;MBQ=31,20;MFRL=159,105;MMQ=60,60;MPOS=29;NALOD=1.38;NLOD=6.92;POPAF=6.00;TLOD=6.96;ANN=A|synonymous_variant|LOW|Fam163a|ENSMUSG00000015484|transcript|ENSMUST00000015628|protein_coding|5/5|c.348C>T|p.Asn116Asn|792/3882|348/507|116/168||	GT:AD:AF:DP:F1R2:F2R1:SB	0/0:28,0:0.040:28:10,0:18,0:14,14,0,0	0/1:10,2:0.167:12:5,0:5,2:5,5,1,1	RY1114T6	chr1_156079056_G>A	28	0	10	2	synonymous_variant	LOW	Fam163a	.	snv	G>A	G:C>A:T	1	.
chr1	156079074	.	T	C	.	clustered_events	AS_FilterStatus=SITE;AS_SB_TABLE=19,17|1,1;DP=40;ECNT=9;GERMQ=63;MBQ=20,20;MFRL=150,105;MMQ=60,60;MPOS=41;NALOD=1.33;NLOD=5.72;POPAF=6.00;TLOD=7.14;ANN=C|synonymous_variant|LOW|Fam163a|ENSMUSG00000015484|transcript|ENSMUST00000015628|protein_coding|5/5|c.330A>G|p.Thr110Thr|774/3882|330/507|110/168||	GT:AD:AF:DP:F1R2:F2R1:SB	0/0:28,0:0.045:28:12,0:16,0:14,14,0,0	0/1:8,2:0.200:10:4,0:4,2:5,3,1,1	RY1114T6	chr1_156079074_T>C	28	0	8	2	synonymous_variant	LOW	Fam163a	.	snv	T>C	A:T>G:C	1	.
chr1	156079094	.	T	A	.	clustered_events;haplotype	AS_FilterStatus=SITE;AS_SB_TABLE=18,17|1,1;DP=37;ECNT=9;GERMQ=73;MBQ=31,20;MFRL=150,105;MMQ=60,60;MPOS=34;NALOD=1.32;NLOD=6.02;POPAF=6.00;TLOD=6.96;ANN=A|missense_variant|MODERATE|Fam163a|ENSMUSG00000015484|transcript|ENSMUST00000015628|protein_coding|5/5|c.310A>T|p.Thr104Ser|754/3882|310/507|104/168||	GT:AD:AF:DP:F1R2:F2R1:PGT:PID:PS:SB	0|0:24,0:0.045:24:9,0:14,0:0|1:156079094_T_A:156079094:12,12,0,0	0|1:11,2:0.167:13:6,0:5,2:0|1:156079094_T_A:156079094:6,5,1,1	RY1114T6	chr1_156079094_T>A	24	0	11	2	missense_variant	MODERATE	Fam163a	.	snv	T>A	A:T>T:A	1	.
chr1	156079097	.	G	T	.	clustered_events;haplotype	AS_FilterStatus=SITE;AS_SB_TABLE=19,16|1,1;DP=37;ECNT=9;GERMQ=73;MBQ=30,20;MFRL=150,105;MMQ=60,60;MPOS=31;NALOD=1.30;NLOD=5.72;POPAF=6.00;TLOD=6.88;ANN=T|missense_variant|MODERATE|Fam163a|ENSMUSG00000015484|transcript|ENSMUST00000015628|protein_coding|5/5|c.307C>A|p.Arg103Ser|751/3882|307/507|103/168||	GT:AD:AF:DP:F1R2:F2R1:PGT:PID:PS:SB	0|0:23,0:0.048:23:9,0:13,0:0|1:156079094_T_A:156079094:12,11,0,0	0|1:12,2:0.154:14:6,0:5,2:0|1:156079094_T_A:156079094:7,5,1,1	RY1114T6	chr1_156079097_G>T	23	0	12	2	missense_variant	MODERATE	Fam163a	.	snv	G>T	G:C>T:A	1	.
chr1	156079101	.	A	T	.	clustered_events;haplotype	AS_FilterStatus=SITE;AS_SB_TABLE=19,15|1,1;DP=36;ECNT=9;GERMQ=69;MBQ=34,20;MFRL=151,105;MMQ=60,60;MPOS=27;NALOD=1.26;NLOD=5.12;POPAF=6.00;TLOD=6.81;ANN=T|synonymous_variant|LOW|Fam163a|ENSMUSG00000015484|transcript|ENSMUST00000015628|protein_coding|5/5|c.303T>A|p.Pro101Pro|747/3882|303/507|101/168||	GT:AD:AF:DP:F1R2:F2R1:PGT:PID:PS:SB	0|0:21,0:0.053:21:6,0:13,0:0|1:156079094_T_A:156079094:11,10,0,0	0|1:13,2:0.143:15:6,0:6,2:0|1:156079094_T_A:156079094:8,5,1,1	RY1114T6	chr1_156079101_A>T	21	0	13	2	synonymous_variant	LOW	Fam163a	.	snv	A>T	A:T>T:A	1	.
chr1	156079110	.	A	G	.	clustered_events;haplotype	AS_FilterStatus=SITE;AS_SB_TABLE=20,14|1,1;DP=36;ECNT=9;GERMQ=69;MBQ=34,38;MFRL=150,105;MMQ=60,60;MPOS=18;NALOD=1.23;NLOD=4.82;POPAF=6.00;TLOD=6.74;ANN=G|synonymous_variant|LOW|Fam163a|ENSMUSG00000015484|transcript|ENSMUST00000015628|protein_coding|5/5|c.294T>C|p.Thr98Thr|738/3882|294/507|98/168||	GT:AD:AF:DP:F1R2:F2R1:PGT:PID:PS:SB	0|0:20,0:0.056:20:6,0:13,0:0|1:156079094_T_A:156079094:10,10,0,0	0|1:14,2:0.133:16:5,0:7,2:0|1:156079094_T_A:156079094:10,4,1,1	RY1114T6	chr1_156079110_A>G	20	0	14	2	synonymous_variant	LOW	Fam163a	.	snv	A>G	A:T>G:C	1	.
chr1	156079113	.	G	A	.	clustered_events;haplotype	AS_FilterStatus=SITE;AS_SB_TABLE=23,14|1,1;DP=39;ECNT=9;GERMQ=77;MBQ=34,28;MFRL=151,105;MMQ=60,60;MPOS=15;NALOD=1.28;NLOD=5.42;POPAF=6.00;TLOD=6.74;ANN=A|synonymous_variant|LOW|Fam163a|ENSMUSG00000015484|transcript|ENSMUST00000015628|protein_coding|5/5|c.291C>T|p.Thr97Thr|735/3882|291/507|97/168||	GT:AD:AF:DP:F1R2:F2R1:PGT:PID:PS:SB	0|0:22,0:0.050:22:8,0:13,0:0|1:156079094_T_A:156079094:12,10,0,0	0|1:15,2:0.133:17:5,0:9,2:0|1:156079094_T_A:156079094:11,4,1,1	RY1114T6	chr1_156079113_G>A	22	0	15	2	synonymous_variant	LOW	Fam163a	.	snv	G>A	G:C>A:T	1	.
chr1	156079116	.	A	G	.	clustered_events;haplotype	AS_FilterStatus=SITE;AS_SB_TABLE=24,17|1,1;DP=43;ECNT=9;GERMQ=85;MBQ=32,34;MFRL=151,105;MMQ=60,60;MPOS=12;NALOD=1.28;NLOD=5.42;POPAF=6.00;TLOD=6.68;ANN=G|synonymous_variant|LOW|Fam163a|ENSMUSG00000015484|transcript|ENSMUST00000015628|protein_coding|5/5|c.288T>C|p.Cys96Cys|732/3882|288/507|96/168||	GT:AD:AF:DP:F1R2:F2R1:PGT:PID:PS:SB	0|0:23,0:0.050:23:10,0:12,0:0|1:156079094_T_A:156079094:12,11,0,0	0|1:18,2:0.125:20:7,0:9,2:0|1:156079094_T_A:156079094:12,6,1,1	RY1114T6	chr1_156079116_A>G	23	0	18	2	synonymous_variant	LOW	Fam163a	.	snv	A>G	A:T>G:C	1	.
chr1	156079124	.	T	TCGC	.	base_qual;clustered_events;haplotype;strand_bias;weak_evidence	AS_FilterStatus=weak_evidence,base_qual,strand_bias;AS_SB_TABLE=24,19|0,1;DP=46;ECNT=9;GERMQ=63;MBQ=20,15;MFRL=151,105;MMQ=60,60;MPOS=13;NALOD=1.28;NLOD=5.42;POPAF=6.00;TLOD=6.61;ANN=TCGC|conservative_inframe_insertion|MODERATE|Fam163a|ENSMUSG00000015484|transcript|ENSMUST00000015628|protein_coding|5/5|c.279_280insGCG|p.Ala93dup|723/3882|279/507|93/168||	GT:AD:AF:DP:F1R2:F2R1:PGT:PID:PS:SB	0|0:24,0:0.050:24:11,0:13,0:0|1:156079094_T_A:156079094:11,13,0,0	0|1:19,1:0.116:20:7,0:11,0:0|1:156079094_T_A:156079094:13,6,0,1	RY1114T6	chr1_156079124_T>TCGC	24	0	19	1	conservative_inframe_insertion	MODERATE	Fam163a	.	indel	.	.	1	.
chr1	156641144	.	A	G	.	clustered_events;haplotype;weak_evidence	AS_FilterStatus=weak_evidence;AS_SB_TABLE=14,11|1,1;DP=27;ECNT=8;GERMQ=42;MBQ=20,20;MFRL=147,100;MMQ=60,60;MPOS=17;NALOD=1.11;NLOD=3.61;POPAF=6.00;TLOD=5.17;ANN=G|synonymous_variant|LOW|Abl2|ENSMUSG00000026596|transcript|ENSMUST00000027888|protein_coding|12/12|c.1977A>G|p.Lys659Lys|1977/3549|1977/3549|659/1182||	GT:AD:AF:DP:F1R2:F2R1:PGT:PID:PS:SB	0|0:17,0:0.071:17:7,0:9,0:0|1:156641144_A_G:156641144:9,8,0,0	0|1:8,2:0.222:10:2,2:6,0:0|1:156641144_A_G:156641144:5,3,1,1	RY1114T6	chr1_156641144_A>G	17	0	8	2	synonymous_variant	LOW	Abl2	.	snv	A>G	A:T>G:C	1	.
chr1	156641150	.	G	A	.	clustered_events;haplotype;weak_evidence	AS_FilterStatus=weak_evidence;AS_SB_TABLE=16,12|1,1;DP=30;ECNT=8;GERMQ=49;MBQ=20,36;MFRL=147,100;MMQ=60,60;MPOS=22;NALOD=1.15;NLOD=3.91;POPAF=6.00;TLOD=5.06;ANN=A|synonymous_variant|LOW|Abl2|ENSMUSG00000026596|transcript|ENSMUST00000027888|protein_coding|12/12|c.1983G>A|p.Arg661Arg|1983/3549|1983/3549|661/1182||	GT:AD:AF:DP:F1R2:F2R1:PGT:PID:PS:SB	0|0:18,0:0.067:18:8,0:10,0:0|1:156641144_A_G:156641144:10,8,0,0	0|1:10,2:0.200:12:2,1:6,0:0|1:156641144_A_G:156641144:6,4,1,1	RY1114T6	chr1_156641150_G>A	18	0	10	2	synonymous_variant	LOW	Abl2	.	snv	G>A	G:C>A:T	1	.
chr1	156641153	.	C	T	.	clustered_events;haplotype;strand_bias	AS_FilterStatus=strand_bias;AS_SB_TABLE=15,12|0,1;DP=28;ECNT=8;GERMQ=54;MBQ=20,37;MFRL=147,100;MMQ=60,60;MPOS=19;NALOD=1.15;NLOD=3.91;POPAF=6.00;TLOD=5.06;ANN=T|synonymous_variant|LOW|Abl2|ENSMUSG00000026596|transcript|ENSMUST00000027888|protein_coding|12/12|c.1986C>T|p.Asn662Asn|1986/3549|1986/3549|662/1182||	GT:AD:AF:DP:F1R2:F2R1:PGT:PID:PS:SB	0|0:18,0:0.067:18:8,0:8,0:0|1:156641144_A_G:156641144:10,8,0,0	0|1:9,1:0.200:10:3,1:6,0:0|1:156641144_A_G:156641144:5,4,0,1	RY1114T6	chr1_156641153_C>T	18	0	9	1	synonymous_variant	LOW	Abl2	.	snv	C>T	G:C>A:T	1	.
chr1	156641156	.	C	T	.	clustered_events;haplotype;strand_bias;weak_evidence	AS_FilterStatus=weak_evidence,strand_bias;AS_SB_TABLE=15,12|0,1;DP=28;ECNT=8;GERMQ=52;MBQ=24,37;MFRL=150,100;MMQ=60,60;MPOS=16;NALOD=1.15;NLOD=3.91;POPAF=6.00;TLOD=5.06;ANN=T|synonymous_variant|LOW|Abl2|ENSMUSG00000026596|transcript|ENSMUST00000027888|protein_coding|12/12|c.1989C>T|p.Ala663Ala|1989/3549|1989/3549|663/1182||	GT:AD:AF:DP:F1R2:F2R1:PGT:PID:PS:SB	0|0:19,0:0.067:19:7,0:9,0:0|1:156641144_A_G:156641144:10,9,0,0	0|1:8,1:0.200:9:3,1:4,0:0|1:156641144_A_G:156641144:5,3,0,1	RY1114T6	chr1_156641156_C>T	19	0	8	1	synonymous_variant	LOW	Abl2	.	snv	C>T	G:C>A:T	1	.
chr1	156641159	.	C	T	.	clustered_events;haplotype;weak_evidence	AS_FilterStatus=weak_evidence;AS_SB_TABLE=15,11|0,1;DP=27;ECNT=8;GERMQ=49;MBQ=20,35;MFRL=150,100;MMQ=60,60;MPOS=13;NALOD=1.11;NLOD=3.61;POPAF=6.00;TLOD=5.06;ANN=T|synonymous_variant|LOW|Abl2|ENSMUSG00000026596|transcript|ENSMUST00000027888|protein_coding|12/12|c.1992C>T|p.Pro664Pro|1992/3549|1992/3549|664/1182||	GT:AD:AF:DP:F1R2:F2R1:PGT:PID:PS:SB	0|0:18,0:0.071:18:7,0:11,0:0|1:156641144_A_G:156641144:10,8,0,0	0|1:8,1:0.200:9:4,1:4,0:0|1:156641144_A_G:156641144:5,3,0,1	RY1114T6	chr1_156641159_C>T	18	0	8	1	synonymous_variant	LOW	Abl2	.	snv	C>T	G:C>A:T	1	.
chr1	156641162	.	G	A	.	clustered_events;haplotype;strand_bias;weak_evidence	AS_FilterStatus=weak_evidence,strand_bias;AS_SB_TABLE=16,10|0,1;DP=27;ECNT=8;GERMQ=49;MBQ=30,34;MFRL=150,100;MMQ=60,60;MPOS=10;NALOD=1.11;NLOD=3.61;POPAF=6.00;TLOD=5.06;ANN=A|synonymous_variant|LOW|Abl2|ENSMUSG00000026596|transcript|ENSMUST00000027888|protein_coding|12/12|c.1995G>A|p.Thr665Thr|1995/3549|1995/3549|665/1182||	GT:AD:AF:DP:F1R2:F2R1:PGT:PID:PS:SB	0|0:18,0:0.071:18:6,0:10,0:0|1:156641144_A_G:156641144:10,8,0,0	0|1:8,1:0.200:9:2,1:4,0:0|1:156641144_A_G:156641144:6,2,0,1	RY1114T6	chr1_156641162_G>A	18	0	8	1	synonymous_variant	LOW	Abl2	.	snv	G>A	G:C>A:T	1	.
chr1	156641168	.	G	C	.	clustered_events;haplotype;strand_bias;weak_evidence	AS_FilterStatus=weak_evidence,strand_bias;AS_SB_TABLE=18,9|0,1;DP=28;ECNT=8;GERMQ=57;MBQ=30,38;MFRL=150,100;MMQ=60,60;MPOS=4;NALOD=1.15;NLOD=3.91;POPAF=6.00;TLOD=4.79;ANN=C|synonymous_variant|LOW|Abl2|ENSMUSG00000026596|transcript|ENSMUST00000027888|protein_coding|12/12|c.2001G>C|p.Pro667Pro|2001/3549|2001/3549|667/1182||	GT:AD:AF:DP:F1R2:F2R1:PGT:PID:PS:SB	0|0:17,0:0.067:17:7,0:9,0:0|1:156641144_A_G:156641144:10,7,0,0	0|1:10,1:0.154:11:4,1:3,0:0|1:156641144_A_G:156641144:8,2,0,1	RY1114T6	chr1_156641168_G>C	17	0	10	1	synonymous_variant	LOW	Abl2	.	snv	G>C	G:C>C:G	1	.
chr1	156641171	.	G	A	.	clustered_events;haplotype;strand_bias;weak_evidence	AS_FilterStatus=weak_evidence,strand_bias;AS_SB_TABLE=19,8|0,1;DP=30;ECNT=8;GERMQ=57;MBQ=35,35;MFRL=150,100;MMQ=60,60;MPOS=1;NALOD=1.19;NLOD=4.21;POPAF=6.00;TLOD=4.87;ANN=A|synonymous_variant|LOW|Abl2|ENSMUSG00000026596|transcript|ENSMUST00000027888|protein_coding|12/12|c.2004G>A|p.Lys668Lys|2004/3549|2004/3549|668/1182||	GT:AD:AF:DP:F1R2:F2R1:PGT:PID:PS:SB	0|0:18,0:0.061:18:8,0:8,0:0|1:156641144_A_G:156641144:11,7,0,0	0|1:9,1:0.167:10:4,1:5,0:0|1:156641144_A_G:156641144:8,1,0,1	RY1114T6	chr1_156641171_G>A	18	0	9	1	synonymous_variant	LOW	Abl2	.	snv	G>A	G:C>A:T	1	.
chr1	158502188	.	C	T	.	clustered_events;haplotype	AS_FilterStatus=SITE;AS_SB_TABLE=86,65|2,1;DP=158;ECNT=11;GERMQ=93;MBQ=36,20;MFRL=164,155;MMQ=60,60;MPOS=9;NALOD=1.85;NLOD=20.77;POPAF=6.00;TLOD=8.52;ANN=T|synonymous_variant|LOW|Astn1|ENSMUSG00000026587|transcript|ENSMUST00000046110|protein_coding|3/23|c.612C>T|p.Ile204Ile|891/7224|612/3909|204/1302||,T|upstream_gene_variant|MODIFIER|Mir488|ENSMUSG00000070103|transcript|ENSMUST00000093595|miRNA|…	GT:AD:AF:DP:F1R2:F2R1:PGT:PID:PS:SB	0|0:85,0:0.014:85:37,0:44,0:0|1:158502188_C_T:158502188:47,38,0,0	0|1:66,3:0.050:69:25,0:39,2:0|1:158502188_C_T:158502188:39,27,2,1	RY1114T6	chr1_158502188_C>T	85	0	66	3	synonymous_variant	LOW	Astn1	PASS	snv	C>T	G:C>A:T	1	.
chr1	158502191	.	A	T	.	clustered_events;haplotype	AS_FilterStatus=SITE;AS_SB_TABLE=87,64|2,1;DP=158;ECNT=11;GERMQ=93;MBQ=34,20;MFRL=164,155;MMQ=60,60;MPOS=12;NALOD=1.85;NLOD=21.07;POPAF=6.00;TLOD=8.55;ANN=T|synonymous_variant|LOW|Astn1|ENSMUSG00000026587|transcript|ENSMUST00000046110|protein_coding|3/23|c.615A>T|p.Pro205Pro|894/7224|615/3909|205/1302||,T|upstream_gene_variant|MODIFIER|Mir488|ENSMUSG00000070103|transcript|ENSMUST00000093595|miRNA…	GT:AD:AF:DP:F1R2:F2R1:PGT:PID:PS:SB	0|0:86,0:0.014:86:39,0:44,0:0|1:158502188_C_T:158502188:48,38,0,0	0|1:65,3:0.052:68:26,0:39,3:0|1:158502188_C_T:158502188:39,26,2,1	RY1114T6	chr1_158502191_A>T	86	0	65	3	synonymous_variant	LOW	Astn1	PASS	snv	A>T	A:T>T:A	1	.
chr1	158502203	.	T	C	.	clustered_events;haplotype	AS_FilterStatus=SITE;AS_SB_TABLE=95,68|2,1;DP=169;ECNT=11;GERMQ=93;MBQ=34,32;MFRL=164,155;MMQ=60,60;MPOS=24;NALOD=1.87;NLOD=21.97;POPAF=6.00;TLOD=8.45;ANN=C|synonymous_variant|LOW|Astn1|ENSMUSG00000026587|transcript|ENSMUST00000046110|protein_coding|3/23|c.627T>C|p.Ile209Ile|906/7224|627/3909|209/1302||,C|upstream_gene_variant|MODIFIER|Mir488|ENSMUSG00000070103|transcript|ENSMUST00000093595|miRNA…	GT:AD:AF:DP:F1R2:F2R1:PGT:PID:PS:SB	0|0:92,0:0.013:92:39,0:53,0:0|1:158502203_T_C:158502203:53,39,0,0	0|1:71,3:0.048:74:24,0:45,3:0|1:158502203_T_C:158502203:42,29,2,1	RY1114T6	chr1_158502203_T>C	92	0	71	3	synonymous_variant	LOW	Astn1	PASS	snv	T>C	A:T>G:C	1	.
chr1	158502206	.	A	C	.	clustered_events;haplotype	AS_FilterStatus=SITE;AS_SB_TABLE=94,69|2,1;DP=166;ECNT=11;GERMQ=93;MBQ=35,33;MFRL=166,155;MMQ=60,60;MPOS=24;NALOD=1.87;NLOD=21.97;POPAF=6.00;TLOD=8.49;ANN=C|synonymous_variant|LOW|Astn1|ENSMUSG00000026587|transcript|ENSMUST00000046110|protein_coding|3/23|c.630A>C|p.Gly210Gly|909/7224|630/3909|210/1302||,C|upstream_gene_variant|MODIFIER|Mir488|ENSMUSG00000070103|transcript|ENSMUST00000093595|miRNA…	GT:AD:AF:DP:F1R2:F2R1:PGT:PID:PS:SB	0|0:94,0:0.013:94:38,0:53,0:0|1:158502203_T_C:158502203:53,41,0,0	0|1:69,3:0.049:72:21,0:45,3:0|1:158502203_T_C:158502203:41,28,2,1	RY1114T6	chr1_158502206_A>C	94	0	69	3	synonymous_variant	LOW	Astn1	PASS	snv	A>C	A:T>C:G	1	.
chr1	158502209	.	C	G	.	clustered_events;haplotype	AS_FilterStatus=SITE;AS_SB_TABLE=94,69|2,1;DP=166;ECNT=11;GERMQ=93;MBQ=35,38;MFRL=166,155;MMQ=60,60;MPOS=25;NALOD=1.87;NLOD=21.97;POPAF=6.00;TLOD=8.47;ANN=G|synonymous_variant|LOW|Astn1|ENSMUSG00000026587|transcript|ENSMUST00000046110|protein_coding|3/23|c.633C>G|p.Gly211Gly|912/7224|633/3909|211/1302||,G|upstream_gene_variant|MODIFIER|Mir488|ENSMUSG00000070103|transcript|ENSMUST00000093595|miRNA…	GT:AD:AF:DP:F1R2:F2R1:PGT:PID:PS:SB	0|0:93,0:0.013:93:36,0:56,0:0|1:158502203_T_C:158502203:52,41,0,0	0|1:70,3:0.048:73:20,0:47,2:0|1:158502203_T_C:158502203:42,28,2,1	RY1114T6	chr1_158502209_C>G	93	0	70	3	synonymous_variant	LOW	Astn1	PASS	snv	C>G	G:C>C:G	1	.
chr1	158502212	.	T	C	.	clustered_events;haplotype	AS_FilterStatus=SITE;AS_SB_TABLE=91,70|2,1;DP=164;ECNT=11;GERMQ=93;MBQ=33,22;MFRL=169,155;MMQ=60,60;MPOS=28;NALOD=1.86;NLOD=21.67;POPAF=6.00;TLOD=8.47;ANN=C|synonymous_variant|LOW|Astn1|ENSMUSG00000026587|transcript|ENSMUST00000046110|protein_coding|3/23|c.636T>C|p.His212His|915/7224|636/3909|212/1302||,C|upstream_gene_variant|MODIFIER|Mir488|ENSMUSG00000070103|transcript|ENSMUST00000093595|miRNA…	GT:AD:AF:DP:F1R2:F2R1:PGT:PID:PS:SB	0|0:90,0:0.014:90:34,0:52,0:0|1:158502203_T_C:158502203:48,42,0,0	0|1:71,3:0.048:74:21,0:47,3:0|1:158502203_T_C:158502203:43,28,2,1	RY1114T6	chr1_158502212_T>C	90	0	71	3	synonymous_variant	LOW	Astn1	PASS	snv	T>C	A:T>G:C	1	.
chr1	158502215	.	G	A	.	clustered_events;haplotype	AS_FilterStatus=SITE;AS_SB_TABLE=90,69|2,1;DP=162;ECNT=11;GERMQ=93;MBQ=36,36;MFRL=169,155;MMQ=60,60;MPOS=31;NALOD=1.88;NLOD=22.28;POPAF=6.00;TLOD=8.45;ANN=A|synonymous_variant|LOW|Astn1|ENSMUSG00000026587|transcript|ENSMUST00000046110|protein_coding|3/23|c.639G>A|p.Gly213Gly|918/7224|639/3909|213/1302||,A|upstream_gene_variant|MODIFIER|Mir488|ENSMUSG00000070103|transcript|ENSMUST00000093595|miRNA…	GT:AD:AF:DP:F1R2:F2R1:PGT:PID:PS:SB	0|0:88,0:0.013:88:33,0:51,0:0|1:158502203_T_C:158502203:46,42,0,0	0|1:71,3:0.048:74:21,0:46,3:0|1:158502203_T_C:158502203:44,27,2,1	RY1114T6	chr1_158502215_G>A	88	0	71	3	synonymous_variant	LOW	Astn1	PASS	snv	G>A	G:C>A:T	1	.
chr1	158502221	.	A	G	.	clustered_events;haplotype	AS_FilterStatus=SITE;AS_SB_TABLE=94,69|2,1;DP=166;ECNT=11;GERMQ=93;MBQ=34,34;MFRL=169,155;MMQ=60,60;MPOS=37;NALOD=1.89;NLOD=22.88;POPAF=6.00;TLOD=8.42;ANN=G|synonymous_variant|LOW|Astn1|ENSMUSG00000026587|transcript|ENSMUST00000046110|protein_coding|3/23|c.645A>G|p.Glu215Glu|924/7224|645/3909|215/1302||,G|upstream_gene_variant|MODIFIER|Mir488|ENSMUSG00000070103|transcript|ENSMUST00000093595|miRNA…	GT:AD:AF:DP:F1R2:F2R1:PGT:PID:PS:SB	0|0:92,0:0.013:92:33,0:51,0:0|1:158502203_T_C:158502203:51,41,0,0	0|1:71,3:0.047:74:20,0:47,3:0|1:158502203_T_C:158502203:43,28,2,1	RY1114T6	chr1_158502221_A>G	92	0	71	3	synonymous_variant	LOW	Astn1	PASS	snv	A>G	A:T>G:C	1	.
chr1	158502225	.	T	C	.	clustered_events;haplotype	AS_FilterStatus=SITE;AS_SB_TABLE=95,68|2,1;DP=170;ECNT=11;GERMQ=93;MBQ=35,29;MFRL=169,155;MMQ=60,60;MPOS=41;NALOD=1.88;NLOD=22.28;POPAF=6.00;TLOD=8.40;ANN=C|synonymous_variant|LOW|Astn1|ENSMUSG00000026587|transcript|ENSMUST00000046110|protein_coding|3/23|c.649T>C|p.Leu217Leu|928/7224|649/3909|217/1302||,C|upstream_gene_variant|MODIFIER|Mir488|ENSMUSG00000070103|transcript|ENSMUST00000093595|miRNA…	GT:AD:AF:DP:F1R2:F2R1:PGT:PID:PS:SB	0|0:92,0:0.013:92:35,0:52,0:0|1:158502203_T_C:158502203:51,41,0,0	0|1:71,3:0.046:74:20,0:49,2:0|1:158502203_T_C:158502203:44,27,2,1	RY1114T6	chr1_158502225_T>C	92	0	71	3	synonymous_variant	LOW	Astn1	PASS	snv	T>C	A:T>G:C	1	.
chr1	158502266	.	T	C	.	clustered_events;haplotype;weak_evidence	AS_FilterStatus=weak_evidence;AS_SB_TABLE=106,82|1,1;DP=193;ECNT=11;GERMQ=93;MBQ=36,26;MFRL=164,143;MMQ=60,60;MPOS=16;NALOD=1.94;NLOD=25.89;POPAF=6.00;TLOD=3.82;ANN=C|synonymous_variant|LOW|Astn1|ENSMUSG00000026587|transcript|ENSMUST00000046110|protein_coding|3/23|c.690T>C|p.Thr230Thr|969/7224|690/3909|230/1302||,C|upstream_gene_variant|MODIFIER|Mir488|ENSMUSG00000070103|transcript|ENSMUST0000009…	GT:AD:AF:DP:F1R2:F2R1:PGT:PID:PS:SB	0|0:105,0:0.011:105:37,0:64,0:0|1:158502266_T_C:158502266:61,44,0,0	0|1:83,2:0.043:85:22,0:53,2:0|1:158502266_T_C:158502266:45,38,1,1	RY1114T6	chr1_158502266_T>C	105	0	83	2	synonymous_variant	LOW	Astn1	.	snv	T>C	A:T>G:C	1	.
chr1	158502275	.	T	C	.	clustered_events;haplotype;weak_evidence	AS_FilterStatus=weak_evidence;AS_SB_TABLE=107,90|1,1;DP=206;ECNT=11;GERMQ=93;MBQ=34,29;MFRL=163,143;MMQ=60,60;MPOS=7;NALOD=1.97;NLOD=27.09;POPAF=6.00;TLOD=3.78;ANN=C|synonymous_variant|LOW|Astn1|ENSMUSG00000026587|transcript|ENSMUST00000046110|protein_coding|3/23|c.699T>C|p.Ile233Ile|978/7224|699/3909|233/1302||,C|upstream_gene_variant|MODIFIER|Mir488|ENSMUSG00000070103|transcript|ENSMUST00000093…	GT:AD:AF:DP:F1R2:F2R1:PGT:PID:PS:SB	0|0:112,0:0.011:112:36,0:73,0:0|1:158502266_T_C:158502266:63,49,0,0	0|1:85,2:0.042:87:22,0:62,2:0|1:158502266_T_C:158502266:44,41,1,1	RY1114T6	chr1_158502275_T>C	112	0	85	2	synonymous_variant	LOW	Astn1	.	snv	T>C	A:T>G:C	1	.
chr1	159863602	.	ACC	A	.	clustered_events;haplotype;weak_evidence	AS_FilterStatus=weak_evidence;AS_SB_TABLE=23,13|1,0;DP=38;ECNT=8;GERMQ=49;MBQ=20,37;MFRL=150,85;MMQ=60,60;MPOS=10;NALOD=1.20;NLOD=4.52;POPAF=6.00;RPA=4,2;RU=C;STR;STRQ=93;TLOD=6.68;ANN=A|intron_variant|MODIFIER|Tnr|ENSMUSG00000015829|transcript|ENSMUST00000111669|protein_coding|5/21|c.1357-33_1357-32delCC||||||INFO_REALIGN_3_PRIME	GT:AD:AF:DP:F1R2:F2R1:PGT:PID:PS:SB	0|0:19,0:0.059:19:10,0:9,0:0|1:159863602_ACC_A:159863602:13,6,0,0	0|1:17,1:0.125:18:8,1:8,0:0|1:159863602_ACC_A:159863602:10,7,1,0	RY1114T6	chr1_159863602_ACC>A	19	0	17	1	intron_variant	MODIFIER	Tnr	.	indel	.	.	1	.
chr1	159863605	.	C	CTTTT	.	clustered_events;haplotype;weak_evidence	AS_FilterStatus=weak_evidence;AS_SB_TABLE=23,14|1,0;DP=38;ECNT=8;GERMQ=51;MBQ=20,36;MFRL=146,85;MMQ=60,60;MPOS=11;NALOD=1.20;NLOD=4.52;POPAF=6.00;TLOD=6.68;ANN=CTTTT|intron_variant|MODIFIER|Tnr|ENSMUSG00000015829|transcript|ENSMUST00000111669|protein_coding|5/21|c.1357-33_1357-32insTTTT||||||	GT:AD:AF:DP:F1R2:F2R1:PGT:PID:PS:SB	0|0:19,0:0.059:19:10,0:9,0:0|1:159863602_ACC_A:159863602:13,6,0,0	0|1:18,1:0.125:19:9,1:8,0:0|1:159863602_ACC_A:159863602:10,8,1,0	RY1114T6	chr1_159863605_C>CTTTT	19	0	18	1	intron_variant	MODIFIER	Tnr	.	indel	.	.	1	.
chr1	159863609	.	TGA	T	.	clustered_events;haplotype;strand_bias;weak_evidence	AS_FilterStatus=weak_evidence,strand_bias;AS_SB_TABLE=23,16|1,0;DP=40;ECNT=8;GERMQ=56;MBQ=20,38;MFRL=146,85;MMQ=60,60;MPOS=19;NALOD=1.20;NLOD=4.52;POPAF=6.00;TLOD=6.68;ANN=T|intron_variant|MODIFIER|Tnr|ENSMUSG00000015829|transcript|ENSMUST00000111669|protein_coding|5/21|c.1357-28_1357-27delGA||||||	GT:AD:AF:DP:F1R2:F2R1:PGT:PID:PS:SB	0|0:19,0:0.059:19:10,0:8,0:0|1:159863602_ACC_A:159863602:13,6,0,0	0|1:20,1:0.125:21:10,1:9,0:0|1:159863602_ACC_A:159863602:10,10,1,0	RY1114T6	chr1_159863609_TGA>T	19	0	20	1	intron_variant	MODIFIER	Tnr	.	indel	.	.	1	.
chr1	159863613	.	T	TTGC	.	clustered_events;haplotype;weak_evidence	AS_FilterStatus=weak_evidence;AS_SB_TABLE=21,16|1,1;DP=39;ECNT=8;GERMQ=46;MBQ=20,36;MFRL=146,85;MMQ=60,60;MPOS=21;NALOD=1.20;NLOD=4.52;POPAF=6.00;TLOD=6.68;ANN=TTGC|intron_variant|MODIFIER|Tnr|ENSMUSG00000015829|transcript|ENSMUST00000111669|protein_coding|5/21|c.1357-24_1357-23insGCT||||||INFO_REALIGN_3_PRIME	GT:AD:AF:DP:F1R2:F2R1:PGT:PID:PS:SB	0|0:18,0:0.059:18:10,0:8,0:0|1:159863602_ACC_A:159863602:12,6,0,0	0|1:19,2:0.125:21:10,1:9,0:0|1:159863602_ACC_A:159863602:9,10,1,1	RY1114T6	chr1_159863613_T>TTGC	18	0	19	2	intron_variant	MODIFIER	Tnr	.	indel	.	.	1	.
chr1	159863620	.	T	C	.	clustered_events;haplotype	AS_FilterStatus=SITE;AS_SB_TABLE=21,19|1,1;DP=42;ECNT=8;GERMQ=81;MBQ=20,20;MFRL=143,85;MMQ=60,60;MPOS=27;NALOD=1.23;NLOD=4.82;POPAF=6.00;TLOD=6.68;ANN=C|intron_variant|MODIFIER|Tnr|ENSMUSG00000015829|transcript|ENSMUST00000111669|protein_coding|5/21|c.1357-18T>C||||||	GT:AD:AF:DP:F1R2:F2R1:PGT:PID:PS:SB	0|0:21,0:0.056:21:8,0:11,0:0|1:159863602_ACC_A:159863602:12,9,0,0	0|1:19,2:0.125:21:9,2:9,0:0|1:159863602_ACC_A:159863602:9,10,1,1	RY1114T6	chr1_159863620_T>C	21	0	19	2	intron_variant	MODIFIER	Tnr	.	snv	T>C	A:T>G:C	1	.
chr1	159863624	.	G	T	.	clustered_events;haplotype	AS_FilterStatus=SITE;AS_SB_TABLE=20,19|1,1;DP=41;ECNT=8;GERMQ=84;MBQ=20,20;MFRL=146,85;MMQ=60,60;MPOS=31;NALOD=1.23;NLOD=4.82;POPAF=6.00;TLOD=6.62;ANN=T|intron_variant|MODIFIER|Tnr|ENSMUSG00000015829|transcript|ENSMUST00000111669|protein_coding|5/21|c.1357-14G>T||||||	GT:AD:AF:DP:F1R2:F2R1:PGT:PID:PS:SB	0|0:19,0:0.056:19:7,0:12,0:0|1:159863602_ACC_A:159863602:10,9,0,0	0|1:20,2:0.118:22:10,2:9,0:0|1:159863602_ACC_A:159863602:10,10,1,1	RY1114T6	chr1_159863624_G>T	19	0	20	2	intron_variant	MODIFIER	Tnr	.	snv	G>T	G:C>T:A	1	.
chr1	159863632	.	C	G	.	clustered_events;haplotype	AS_FilterStatus=SITE;AS_SB_TABLE=19,21|1,1;DP=42;ECNT=8;GERMQ=84;MBQ=27,20;MFRL=143,85;MMQ=60,60;MPOS=39;NALOD=1.23;NLOD=4.82;POPAF=6.00;TLOD=6.62;ANN=G|splice_region_variant&intron_variant|LOW|Tnr|ENSMUSG00000015829|transcript|ENSMUST00000111669|protein_coding|5/21|c.1357-6C>G||||||	GT:AD:AF:DP:F1R2:F2R1:PGT:PID:PS:SB	0|0:20,0:0.056:20:7,0:13,0:0|1:159863602_ACC_A:159863602:10,10,0,0	0|1:20,2:0.118:22:9,2:11,0:0|1:159863602_ACC_A:159863602:9,11,1,1	RY1114T6	chr1_159863632_C>G	20	0	20	2	splice_region_variant&intron_variant	LOW	Tnr	.	snv	C>G	G:C>C:G	1	.
chr1	159863649	.	A	G	.	clustered_events	AS_FilterStatus=SITE;AS_SB_TABLE=21,24|1,1;DP=47;ECNT=8;GERMQ=93;MBQ=20,20;MFRL=153,85;MMQ=60,60;MPOS=45;NALOD=1.30;NLOD=5.72;POPAF=6.00;TLOD=5.57;ANN=G|synonymous_variant|LOW|Tnr|ENSMUSG00000015829|transcript|ENSMUST00000111669|protein_coding|6/22|c.1368A>G|p.Gly456Gly|1531/4424|1368/4077|456/1358||	GT:AD:AF:DP:F1R2:F2R1:SB	0/0:25,0:0.048:25:8,0:17,0:12,13,0,0	0/1:20,2:0.118:22:9,2:10,0:9,11,1,1	RY1114T6	chr1_159863649_A>G	25	0	20	2	synonymous_variant	LOW	Tnr	.	snv	A>G	A:T>G:C	1	.
chr1	159886085	.	A	G	.	PASS	AS_FilterStatus=SITE;AS_SB_TABLE=25,2|1,1;DP=29;ECNT=1;GERMQ=55;MBQ=35,20;MFRL=176,116;MMQ=60,60;MPOS=29;NALOD=1.000;NLOD=2.71;POPAF=6.00;TLOD=6.51;ANN=G|synonymous_variant|LOW|Tnr|ENSMUSG00000015829|transcript|ENSMUST00000111669|protein_coding|10/22|c.2082A>G|p.Val694Val|2245/4424|2082/4077|694/1358||	GT:AD:AF:DP:F1R2:F2R1:SB	0/0:10,0:0.091:10:4,0:5,0:9,1,0,0	0/1:17,2:0.105:19:5,0:9,2:16,1,1,1	RY1114T6	chr1_159886085_A>G	10	0	17	2	synonymous_variant	LOW	Tnr	.	snv	A>G	A:T>G:C	1	.
chr1	160577439	.	A	G	.	clustered_events;haplotype	AS_FilterStatus=SITE;AS_SB_TABLE=121,97|2,1;DP=225;ECNT=11;GERMQ=93;MBQ=30,20;MFRL=152,118;MMQ=60,60;MPOS=12;NALOD=2.01;NLOD=29.80;POPAF=6.00;TLOD=7.16;ANN=G|intron_variant|MODIFIER|Rabgap1l|ENSMUSG00000026721|transcript|ENSMUST00000028049|protein_coding|13/20|c.1710+49776T>C||||||	GT:AD:AF:DP:F1R2:F2R1:PGT:PID:PS:SB	0|0:133,0:9.788e-03:133:44,0:83,0:0|1:160577439_A_G:160577439:75,58,0,0	0|1:85,3:0.042:88:24,3:59,0:0|1:160577439_A_G:160577439:46,39,2,1	RY1114T6	chr1_160577439_A>G	133	0	85	3	intron_variant	MODIFIER	Rabgap1l	PASS	snv	A>G	A:T>G:C	1	.
chr1	160577445	.	A	G	.	clustered_events;haplotype	AS_FilterStatus=SITE;AS_SB_TABLE=126,109|2,1;DP=238;ECNT=11;GERMQ=93;MBQ=31,20;MFRL=153,118;MMQ=60,60;MPOS=18;NALOD=2.03;NLOD=31.61;POPAF=6.00;TLOD=7.14;ANN=G|intron_variant|MODIFIER|Rabgap1l|ENSMUSG00000026721|transcript|ENSMUST00000028049|protein_coding|13/20|c.1710+49770T>C||||||	GT:AD:AF:DP:F1R2:F2R1:PGT:PID:PS:SB	0|0:146,0:9.274e-03:146:43,0:91,0:0|1:160577439_A_G:160577439:80,66,0,0	0|1:89,3:0.041:92:27,3:55,0:0|1:160577439_A_G:160577439:46,43,2,1	RY1114T6	chr1_160577445_A>G	146	0	89	3	intron_variant	MODIFIER	Rabgap1l	PASS	snv	A>G	A:T>G:C	1	.
chr1	160577448	.	A	G	.	clustered_events;haplotype	AS_FilterStatus=SITE;AS_SB_TABLE=125,110|2,1;DP=238;ECNT=11;GERMQ=93;MBQ=20,20;MFRL=150,118;MMQ=60,60;MPOS=21;NALOD=2.03;NLOD=31.61;POPAF=6.00;TLOD=7.18;ANN=G|intron_variant|MODIFIER|Rabgap1l|ENSMUSG00000026721|transcript|ENSMUST00000028049|protein_coding|13/20|c.1710+49767T>C||||||	GT:AD:AF:DP:F1R2:F2R1:PGT:PID:PS:SB	0|0:144,0:9.274e-03:144:46,0:85,0:0|1:160577439_A_G:160577439:79,65,0,0	0|1:91,3:0.043:94:29,3:55,0:0|1:160577439_A_G:160577439:46,45,2,1	RY1114T6	chr1_160577448_A>G	144	0	91	3	intron_variant	MODIFIER	Rabgap1l	PASS	snv	A>G	A:T>G:C	1	.
chr1	160577454	.	G	T	.	clustered_events;haplotype	AS_FilterStatus=SITE;AS_SB_TABLE=117,110|2,2;DP=238;ECNT=11;GERMQ=93;MBQ=20,20;MFRL=150,123;MMQ=60,60;MPOS=27;NALOD=2.04;NLOD=31.91;POPAF=6.00;TLOD=7.22;ANN=T|intron_variant|MODIFIER|Rabgap1l|ENSMUSG00000026721|transcript|ENSMUST00000028049|protein_coding|13/20|c.1710+49761C>A||||||	GT:AD:AF:DP:F1R2:F2R1:PGT:PID:PS:SB	0|0:141,0:9.160e-03:141:52,0:88,0:0|1:160577439_A_G:160577439:76,65,0,0	0|1:86,4:0.044:90:30,3:50,1:0|1:160577439_A_G:160577439:41,45,2,2	RY1114T6	chr1_160577454_G>T	141	0	86	4	intron_variant	MODIFIER	Rabgap1l	PASS	snv	G>T	G:C>T:A	1	.
chr1	160577489	.	GG	AA	.	clustered_events;haplotype	AS_FilterStatus=SITE;AS_SB_TABLE=106,127|2,2;DP=242;ECNT=11;GERMQ=93;MBQ=20,20;MFRL=150,123;MMQ=60,60;MPOS=38;NALOD=2.01;NLOD=30.70;POPAF=6.00;TLOD=7.09;ANN=AA|intron_variant|MODIFIER|Rabgap1l|ENSMUSG00000026721|transcript|ENSMUST00000028049|protein_coding|13/20|c.1710+49725_1710+49726delCCinsTT||||||	GT:AD:AF:DP:F1R2:F2R1:PGT:PID:PS:SB	0|0:143,0:9.576e-03:143:50,0:91,0:0|1:160577489_GG_AA:160577489:62,81,0,0	0|1:90,4:0.040:94:36,3:52,1:0|1:160577489_GG_AA:160577489:44,46,2,2	RY1114T6	chr1_160577489_GG>AA	143	0	90	4	intron_variant	MODIFIER	Rabgap1l	PASS	indel	.	.	1	.
chr1	160577493	.	G	A	.	clustered_events;haplotype	AS_FilterStatus=SITE;AS_SB_TABLE=107,126|2,2;DP=237;ECNT=11;GERMQ=93;MBQ=20,20;MFRL=150,123;MMQ=60,60;MPOS=35;NALOD=2.01;NLOD=30.70;POPAF=6.00;TLOD=7.09;ANN=A|intron_variant|MODIFIER|Rabgap1l|ENSMUSG00000026721|transcript|ENSMUST00000028049|protein_coding|13/20|c.1710+49722C>T||||||	GT:AD:AF:DP:F1R2:F2R1:PGT:PID:PS:SB	0|0:143,0:9.615e-03:143:50,0:90,0:0|1:160577489_GG_AA:160577489:62,81,0,0	0|1:90,4:0.040:94:35,3:49,1:0|1:160577489_GG_AA:160577489:45,45,2,2	RY1114T6	chr1_160577493_G>A	143	0	90	4	intron_variant	MODIFIER	Rabgap1l	PASS	snv	G>A	G:C>A:T	1	.
chr1	160577499	.	G	A	.	clustered_events;haplotype	AS_FilterStatus=SITE;AS_SB_TABLE=109,123|2,2;DP=236;ECNT=11;GERMQ=93;MBQ=20,20;MFRL=152,123;MMQ=60,60;MPOS=29;NALOD=2.01;NLOD=30.70;POPAF=6.00;TLOD=7.09;ANN=A|intron_variant|MODIFIER|Rabgap1l|ENSMUSG00000026721|transcript|ENSMUST00000028049|protein_coding|13/20|c.1710+49716C>T||||||	GT:AD:AF:DP:F1R2:F2R1:PGT:PID:PS:SB	0|0:144,0:9.615e-03:144:51,0:85,0:0|1:160577489_GG_AA:160577489:65,79,0,0	0|1:88,4:0.040:92:35,3:49,1:0|1:160577489_GG_AA:160577489:44,44,2,2	RY1114T6	chr1_160577499_G>A	144	0	88	4	intron_variant	MODIFIER	Rabgap1l	PASS	snv	G>A	G:C>A:T	1	.
chr1	160577508	.	G	C	.	clustered_events;haplotype	AS_FilterStatus=SITE;AS_SB_TABLE=108,118|2,2;DP=230;ECNT=11;GERMQ=93;MBQ=32,20;MFRL=153,123;MMQ=60,60;MPOS=20;NALOD=2.00;NLOD=29.50;POPAF=6.00;TLOD=7.09;ANN=C|intron_variant|MODIFIER|Rabgap1l|ENSMUSG00000026721|transcript|ENSMUST00000028049|protein_coding|13/20|c.1710+49707C>G||||||	GT:AD:AF:DP:F1R2:F2R1:PGT:PID:PS:SB	0|0:138,0:0.010:138:52,0:79,0:0|1:160577489_GG_AA:160577489:63,75,0,0	0|1:88,4:0.040:92:36,3:48,1:0|1:160577489_GG_AA:160577489:45,43,2,2	RY1114T6	chr1_160577508_G>C	138	0	88	4	intron_variant	MODIFIER	Rabgap1l	PASS	snv	G>C	G:C>C:G	1	.
chr1	160577514	.	T	A	.	clustered_events;haplotype	AS_FilterStatus=SITE;AS_SB_TABLE=111,119|1,2;DP=233;ECNT=11;GERMQ=93;MBQ=32,32;MFRL=153,127;MMQ=60,60;MPOS=14;NALOD=2.02;NLOD=31.01;POPAF=6.00;TLOD=7.11;ANN=A|intron_variant|MODIFIER|Rabgap1l|ENSMUSG00000026721|transcript|ENSMUST00000028049|protein_coding|13/20|c.1710+49701A>T||||||	GT:AD:AF:DP:F1R2:F2R1:PGT:PID:PS:SB	0|0:142,0:9.524e-03:142:53,0:79,0:0|1:160577489_GG_AA:160577489:66,76,0,0	0|1:88,3:0.040:91:34,2:46,1:0|1:160577489_GG_AA:160577489:45,43,1,2	RY1114T6	chr1_160577514_T>A	142	0	88	3	intron_variant	MODIFIER	Rabgap1l	PASS	snv	T>A	A:T>T:A	1	.
chr1	160577517	.	A	G	.	clustered_events;haplotype	AS_FilterStatus=SITE;AS_SB_TABLE=105,118|1,2;DP=226;ECNT=11;GERMQ=93;MBQ=33,36;MFRL=153,127;MMQ=60,60;MPOS=11;NALOD=2.01;NLOD=30.70;POPAF=6.00;TLOD=7.15;ANN=G|intron_variant|MODIFIER|Rabgap1l|ENSMUSG00000026721|transcript|ENSMUST00000028049|protein_coding|13/20|c.1710+49698T>C||||||	GT:AD:AF:DP:F1R2:F2R1:PGT:PID:PS:SB	0|0:137,0:9.615e-03:137:54,0:80,0:0|1:160577489_GG_AA:160577489:62,75,0,0	0|1:86,3:0.042:89:36,2:46,1:0|1:160577489_GG_AA:160577489:43,43,1,2	RY1114T6	chr1_160577517_A>G	137	0	86	3	intron_variant	MODIFIER	Rabgap1l	PASS	snv	A>G	A:T>G:C	1	.
chr1	160577520	.	G	A	.	clustered_events;haplotype	AS_FilterStatus=SITE;AS_SB_TABLE=104,114|1,2;DP=224;ECNT=11;GERMQ=93;MBQ=35,35;MFRL=154,127;MMQ=60,60;MPOS=8;NALOD=2.02;NLOD=31.01;POPAF=6.00;TLOD=7.22;ANN=A|intron_variant|MODIFIER|Rabgap1l|ENSMUSG00000026721|transcript|ENSMUST00000028049|protein_coding|13/20|c.1710+49695C>T||||||	GT:AD:AF:DP:F1R2:F2R1:PGT:PID:PS:SB	0|0:137,0:9.485e-03:137:54,0:77,0:0|1:160577489_GG_AA:160577489:62,75,0,0	0|1:81,3:0.044:84:36,2:44,1:0|1:160577489_GG_AA:160577489:42,39,1,2	RY1114T6	chr1_160577520_G>A	137	0	81	3	intron_variant	MODIFIER	Rabgap1l	PASS	snv	G>A	G:C>A:T	1	.
chr1	160930065	.	ATTT	A	.	clustered_events;haplotype;weak_evidence	AS_FilterStatus=weak_evidence;AS_SB_TABLE=23,3|1,0;DP=27;ECNT=4;GERMQ=38;MBQ=35,37;MFRL=158,148;MMQ=60,60;MPOS=30;NALOD=1.000;NLOD=2.71;POPAF=6.00;RPA=6,3;RU=T;STR;STRQ=93;TLOD=6.62;ANN=A|5_prime_UTR_variant|MODIFIER|Rc3h1|ENSMUSG00000040423|transcript|ENSMUST00000161609|protein_coding|2/20|c.-45_-43delTTT|||||43|INFO_REALIGN_3_PRIME	GT:AD:AF:DP:F1R2:F2R1:PGT:PID:PS:SB	0|0:10,0:0.091:10:1,0:9,0:0|1:160930065_ATTT_A:160930065:9,1,0,0	0|1:16,1:0.118:17:8,1:5,0:0|1:160930065_ATTT_A:160930065:14,2,1,0	RY1114T6	chr1_160930065_ATTT>A	10	0	16	1	5_prime_UTR_variant	MODIFIER	Rc3h1	.	indel	.	.	1	.
chr1	160930082	.	G	T	.	clustered_events;haplotype	AS_FilterStatus=SITE;AS_SB_TABLE=25,7|1,1;DP=34;ECNT=4;GERMQ=63;MBQ=37,37;MFRL=156,148;MMQ=60,60;MPOS=23;NALOD=1.000;NLOD=2.71;POPAF=6.00;TLOD=6.51;ANN=T|5_prime_UTR_premature_start_codon_gain_variant|LOW|Rc3h1|ENSMUSG00000040423|transcript|ENSMUST00000161609|protein_coding|2/20|c.-32G>T||||||,T|5_prime_UTR_variant|MODIFIER|Rc3h1|ENSMUSG00000040423|transcript|ENSMUST00000161609|protein_coding|2/2…	GT:AD:AF:DP:F1R2:F2R1:PGT:PID:PS:SB	0|0:12,0:0.091:12:1,0:10,0:0|1:160930065_ATTT_A:160930065:9,3,0,0	0|1:20,2:0.105:22:12,2:7,0:0|1:160930065_ATTT_A:160930065:16,4,1,1	RY1114T6	chr1_160930082_G>T	12	0	20	2	5_prime_UTR_premature_start_codon_gain_variant	LOW	Rc3h1	.	snv	G>T	G:C>T:A	1	.
chr1	160930083	.	TGC	T	.	clustered_events;haplotype;weak_evidence	AS_FilterStatus=weak_evidence;AS_SB_TABLE=27,7|1,1;DP=36;ECNT=4;GERMQ=36;MBQ=34,38;MFRL=155,148;MMQ=60,60;MPOS=24;NALOD=1.08;NLOD=3.31;POPAF=6.00;TLOD=6.51;ANN=T|5_prime_UTR_variant|MODIFIER|Rc3h1|ENSMUSG00000040423|transcript|ENSMUST00000161609|protein_coding|2/20|c.-29_-28delCG|||||28|INFO_REALIGN_3_PRIME	GT:AD:AF:DP:F1R2:F2R1:PGT:PID:PS:SB	0|0:14,0:0.077:14:1,0:11,0:0|1:160930065_ATTT_A:160930065:11,3,0,0	0|1:20,2:0.105:22:12,2:8,0:0|1:160930065_ATTT_A:160930065:16,4,1,1	RY1114T6	chr1_160930083_TGC>T	14	0	20	2	5_prime_UTR_variant	MODIFIER	Rc3h1	.	indel	.	.	1	.
chr1	160930091	.	A	C	.	clustered_events;haplotype	AS_FilterStatus=SITE;AS_SB_TABLE=30,7|1,1;DP=41;ECNT=4;GERMQ=77;MBQ=33,20;MFRL=155,148;MMQ=60,60;MPOS=29;NALOD=1.08;NLOD=3.31;POPAF=6.00;TLOD=6.37;ANN=C|5_prime_UTR_variant|MODIFIER|Rc3h1|ENSMUSG00000040423|transcript|ENSMUST00000161609|protein_coding|2/20|c.-23A>C|||||23|	GT:AD:AF:DP:F1R2:F2R1:PGT:PID:PS:SB	0|0:14,0:0.077:14:3,0:11,0:0|1:160930065_ATTT_A:160930065:11,3,0,0	0|1:23,2:0.090:25:12,2:9,0:0|1:160930065_ATTT_A:160930065:19,4,1,1	RY1114T6	chr1_160930091_A>C	14	0	23	2	5_prime_UTR_variant	MODIFIER	Rc3h1	.	snv	A>C	A:T>C:G	1	.
chr1	161109716	.	C	A	.	weak_evidence	AS_FilterStatus=weak_evidence;AS_SB_TABLE=83,59|2,1;DP=147;ECNT=1;GERMQ=93;MBQ=20,20;MFRL=147,102;MMQ=60,60;MPOS=28;NALOD=1.71;NLOD=15.05;POPAF=6.00;TLOD=3.93;ANN=A|stop_gained|HIGH|Klhl20|ENSMUSG00000026705|transcript|ENSMUST00000111611|protein_coding|3/12|c.88G>T|p.Glu30*|293/4072|88/1815|30/604||;LOF=(Klhl20|ENSMUSG00000026705|1|1.00);NMD=(Klhl20|ENSMUSG00000026705|1|1.00)	GT:AD:AF:DP:F1R2:F2R1:SB	0/0:64,0:0.019:64:19,0:45,0:42,22,0,0	0/1:78,3:0.050:81:24,0:54,3:41,37,2,1	RY1114T6	chr1_161109716_C>A	64	0	78	3	stop_gained	HIGH	Klhl20	PASS	snv	C>A	G:C>T:A	1	.
chr1	161500590	.	G	A	.	weak_evidence	AS_FilterStatus=weak_evidence;AS_SB_TABLE=3,66|0,2;DP=74;ECNT=1;GERMQ=93;MBQ=35,35;MFRL=175,190;MMQ=60,60;MPOS=4;NALOD=1.61;NLOD=12.04;POPAF=6.00;TLOD=3.69;ANN=A|intron_variant|MODIFIER|Tnfsf18|ENSMUSG00000066755|transcript|ENSMUST00000086084|protein_coding|2/2|c.169+86G>A||||||	GT:AD:AF:DP:F1R2:F2R1:SB	0/0:43,0:0.024:43:22,0:21,0:3,40,0,0	0/1:26,2:0.099:28:9,1:17,1:0,26,0,2	RY1114T6	chr1_161500590_G>A	43	0	26	2	intron_variant	MODIFIER	Tnfsf18	.	snv	G>A	G:C>A:T	1	.
chr1	163055804	.	A	G	.	weak_evidence	AS_FilterStatus=weak_evidence;AS_SB_TABLE=0,18|1,1;DP=20;ECNT=1;GERMQ=36;MBQ=37,20;MFRL=170,129;MMQ=60,60;MPOS=36;NALOD=1.08;NLOD=3.31;POPAF=6.00;TLOD=3.07;ANN=G|upstream_gene_variant|MODIFIER|Gm22671|ENSMUSG00000077608|transcript|ENSMUST00000104420|snoRNA||n.-853T>C|||||853|,G|intron_variant|MODIFIER|Mroh9|ENSMUSG00000071890|transcript|ENSMUST00000096608|protein_coding|12/21|c.1210-105T>C||||||	GT:AD:AF:DP:F1R2:F2R1:SB	0/0:11,0:0.077:11:3,0:8,0:0,11,0,0	0/1:7,2:0.200:9:5,2:2,0:0,7,1,1	RY1114T6	chr1_163055804_A>G	11	0	7	2	upstream_gene_variant	MODIFIER	Gm22671	.	snv	A>G	A:T>G:C	1	.
chr1	164076122	.	A	T	.	strand_bias	AS_FilterStatus=strand_bias;AS_SB_TABLE=32,20|5,0;DP=62;ECNT=1;GERMQ=93;MBQ=20,20;MFRL=135,134;MMQ=60,60;MPOS=22;NALOD=0.837;NLOD=3.31;POPAF=6.00;TLOD=7.89;ANN=T|intron_variant|MODIFIER|Sell|ENSMUSG00000026581|transcript|ENSMUST00000027871|protein_coding|7/8|c.1082-20A>T||||||	GT:AD:AF:DP:F1R2:F2R1:SB	0/0:14,0:0.073:14:8,0:6,0:11,3,0,0	0/1:38,5:0.169:43:13,0:24,3:21,17,5,0	RY1114T6	chr1_164076122_A>T	14	0	38	5	intron_variant	MODIFIER	Sell	PASS	snv	A>T	A:T>T:A	1	.
chr1	164262038	.	G	T	.	base_qual;clustered_events;haplotype;normal_artifact;strand_bias;weak_evidence	AS_FilterStatus=weak_evidence,base_qual,strand_bias;AS_SB_TABLE=85,45|5,0;DP=135;ECNT=3;GERMQ=93;MBQ=20,19;MFRL=155,152;MMQ=60,60;MPOS=17;NALOD=-1.293e+00;NLOD=9.11;POPAF=6.00;TLOD=4.13;ANN=T|intron_variant|MODIFIER|Slc19a2|ENSMUSG00000040918|transcript|ENSMUST00000044021|protein_coding|3/5|c.1034-9G>T||||||	GT:AD:AF:DP:F1R2:F2R1:PGT:PID:PS:SB	0|0:63,3:0.047:66:30,0:28,1:0|1:164262038_G_T:164262038:41,22,3,0	0|1:67,2:0.056:69:26,0:31,1:0|1:164262038_G_T:164262038:44,23,2,0	RY1114T6	chr1_164262038_G>T	63	3	67	2	intron_variant	MODIFIER	Slc19a2	.	snv	G>T	G:C>T:A	2	.
chr1	164262043	.	G	T	.	base_qual;clustered_events;haplotype;normal_artifact;strand_bias;weak_evidence	AS_FilterStatus=weak_evidence,base_qual,strand_bias;AS_SB_TABLE=90,50|5,0;DP=145;ECNT=3;GERMQ=93;MBQ=20,9;MFRL=154,152;MMQ=60,60;MPOS=22;NALOD=-1.194e+00;NLOD=10.62;POPAF=6.00;TLOD=4.08;ANN=T|splice_region_variant&intron_variant|LOW|Slc19a2|ENSMUSG00000040918|transcript|ENSMUST00000044021|protein_coding|3/5|c.1034-4G>T||||||	GT:AD:AF:DP:F1R2:F2R1:PGT:PID:PS:SB	0|0:71,3:0.042:74:33,0:32,1:0|1:164262038_G_T:164262038:46,25,3,0	0|1:69,2:0.054:71:28,0:33,1:0|1:164262038_G_T:164262038:44,25,2,0	RY1114T6	chr1_164262043_G>T	71	3	69	2	splice_region_variant&intron_variant	LOW	Slc19a2	.	snv	G>T	G:C>T:A	2	.
chr1	164262045	.	A	T	.	base_qual;clustered_events;haplotype;normal_artifact;strand_bias;weak_evidence	AS_FilterStatus=weak_evidence,base_qual,strand_bias;AS_SB_TABLE=90,50|5,0;DP=147;ECNT=3;GERMQ=93;MBQ=20,9;MFRL=154,152;MMQ=60,60;MPOS=24;NALOD=-1.184e+00;NLOD=10.62;POPAF=6.00;TLOD=4.08;ANN=T|splice_acceptor_variant&intron_variant|HIGH|Slc19a2|ENSMUSG00000040918|transcript|ENSMUST00000044021|protein_coding|3/5|c.1034-2A>T||||||;LOF=(Slc19a2|ENSMUSG00000040918|1|1.00)	GT:AD:AF:DP:F1R2:F2R1:PGT:PID:PS:SB	0|0:71,3:0.042:74:34,0:34,0:0|1:164262038_G_T:164262038:46,25,3,0	0|1:69,2:0.054:71:30,0:36,1:0|1:164262038_G_T:164262038:44,25,2,0	RY1114T6	chr1_164262045_A>T	71	3	69	2	splice_acceptor_variant&intron_variant	HIGH	Slc19a2	.	snv	A>T	A:T>T:A	1	.
chr1	165561922	.	C	A	.	weak_evidence	AS_FilterStatus=weak_evidence;AS_SB_TABLE=0,13|1,1;DP=15;ECNT=1;GERMQ=23;MBQ=36,20;MFRL=168,130;MMQ=60,60;MPOS=19;NALOD=1.000;NLOD=2.71;POPAF=6.00;TLOD=3.45;ANN=A|intron_variant|MODIFIER|Adcy10|ENSMUSG00000026567|transcript|ENSMUST00000027852|protein_coding|26/33|c.3747+91C>A||||||	GT:AD:AF:DP:F1R2:F2R1:SB	0/0:9,0:0.091:9:7,0:2,0:0,9,0,0	0/1:4,2:0.286:6:2,2:2,0:0,4,1,1	RY1114T6	chr1_165561922_C>A	9	0	4	2	intron_variant	MODIFIER	Adcy10	.	snv	C>A	G:C>T:A	1	.
chr1	165866799	.	C	A	.	PASS	AS_FilterStatus=SITE;AS_SB_TABLE=5,32|0,3;DP=44;ECNT=1;GERMQ=76;MBQ=36,35;MFRL=152,171;MMQ=60,60;MPOS=22;NALOD=1.30;NLOD=5.72;POPAF=6.00;TLOD=7.04;ANN=A|missense_variant|MODERATE|Cd247|ENSMUSG00000005763|transcript|ENSMUST00000027849|protein_coding|8/8|c.574C>A|p.Pro192Thr|680/1317|574/621|192/206||,A|downstream_gene_variant|MODIFIER|RP23-36P10.7|ENSMUSG00000099187|transcript|ENSMUST00000184361|a…	GT:AD:AF:DP:F1R2:F2R1:SB	0/0:21,0:0.048:21:8,0:12,0:2,19,0,0	0/1:16,3:0.219:19:4,0:12,3:3,13,0,3	RY1114T6	chr1_165866799_C>A	21	0	16	3	missense_variant	MODERATE	Cd247	PASS	snv	C>A	G:C>T:A	1	PASS
chr1	168431325	.	T	C	.	clustered_events;weak_evidence	AS_FilterStatus=weak_evidence;AS_SB_TABLE=21,17|1,2;DP=41;ECNT=3;GERMQ=64;MBQ=20,20;MFRL=140,115;MMQ=60,60;MPOS=25;NALOD=1.11;NLOD=3.61;POPAF=6.00;TLOD=3.80;ANN=C|synonymous_variant|LOW|Pbx1|ENSMUSG00000052534|transcript|ENSMUST00000176540|protein_coding|1/9|c.180A>G|p.Glu60Glu|573/6891|180/1293|60/430||	GT:AD:AF:DP:F1R2:F2R1:SB	0/0:18,0:0.071:18:2,0:16,0:9,9,0,0	0/1:20,3:0.142:23:7,2:13,1:12,8,1,2	RY1114T6	chr1_168431325_T>C	18	0	20	3	synonymous_variant	LOW	Pbx1	PASS	snv	T>C	A:T>G:C	1	.
chr1	168431373	.	C	T	.	clustered_events;haplotype	AS_FilterStatus=SITE;AS_SB_TABLE=20,26|1,2;DP=49;ECNT=3;GERMQ=83;MBQ=20,20;MFRL=140,115;MMQ=60,60;MPOS=27;NALOD=1.15;NLOD=3.91;POPAF=6.00;TLOD=9.84;ANN=T|synonymous_variant|LOW|Pbx1|ENSMUSG00000052534|transcript|ENSMUST00000176540|protein_coding|1/9|c.132G>A|p.Gly44Gly|525/6891|132/1293|44/430||	GT:AD:AF:DP:F1R2:F2R1:PGT:PID:PS:SB	0|0:20,0:0.067:20:6,0:13,0:0|1:168431373_C_T:168431373:9,11,0,0	0|1:26,3:0.130:29:11,2:15,1:0|1:168431373_C_T:168431373:11,15,1,2	RY1114T6	chr1_168431373_C>T	20	0	26	3	synonymous_variant	LOW	Pbx1	PASS	snv	C>T	G:C>A:T	1	.
chr1	168431376	.	G	A	.	clustered_events;haplotype	AS_FilterStatus=SITE;AS_SB_TABLE=21,25|1,2;DP=49;ECNT=3;GERMQ=83;MBQ=20,20;MFRL=140,115;MMQ=60,60;MPOS=24;NALOD=1.15;NLOD=3.91;POPAF=6.00;TLOD=9.84;ANN=A|synonymous_variant|LOW|Pbx1|ENSMUSG00000052534|transcript|ENSMUST00000176540|protein_coding|1/9|c.129C>T|p.Ile43Ile|522/6891|129/1293|43/430||	GT:AD:AF:DP:F1R2:F2R1:PGT:PID:PS:SB	0|0:20,0:0.067:20:6,0:14,0:0|1:168431373_C_T:168431373:9,11,0,0	0|1:26,3:0.130:29:12,2:13,1:0|1:168431373_C_T:168431373:12,14,1,2	RY1114T6	chr1_168431376_G>A	20	0	26	3	synonymous_variant	LOW	Pbx1	PASS	snv	G>A	G:C>A:T	1	.
chr1	170301590	.	C	T	.	PASS	AS_FilterStatus=SITE;AS_SB_TABLE=51,47|2,1;DP=103;ECNT=2;GERMQ=93;MBQ=20,20;MFRL=143,68;MMQ=60,60;MPOS=20;NALOD=1.62;NLOD=12.04;POPAF=6.00;TLOD=9.13;ANN=T|synonymous_variant|LOW|Gm7694|ENSMUSG00000096603|transcript|ENSMUST00000179801|protein_coding|3/3|c.369G>A|p.Arg123Arg|436/3833|369/813|123/270||	GT:AD:AF:DP:F1R2:F2R1:PGT:PID:PS:SB	0|0:54,0:0.024:54:19,0:33,0:0|1:170301590_C_T:170301590:27,27,0,0	0|1:44,3:0.079:47:16,2:25,1:0|1:170301590_C_T:170301590:24,20,2,1	RY1114T6	chr1_170301590_C>T	54	0	44	3	synonymous_variant	LOW	Gm7694	PASS	snv	C>T	G:C>A:T	1	PASS
chr1	170301592	.	G	T	.	PASS	AS_FilterStatus=SITE;AS_SB_TABLE=51,47|2,1;DP=103;ECNT=2;GERMQ=93;MBQ=21,20;MFRL=143,68;MMQ=60,60;MPOS=22;NALOD=1.61;NLOD=12.04;POPAF=6.00;TLOD=9.13;ANN=T|synonymous_variant|LOW|Gm7694|ENSMUSG00000096603|transcript|ENSMUST00000179801|protein_coding|3/3|c.367C>A|p.Arg123Arg|434/3833|367/813|123/270||	GT:AD:AF:DP:F1R2:F2R1:PGT:PID:PS:SB	0|0:54,0:0.024:54:19,0:32,0:0|1:170301590_C_T:170301590:27,27,0,0	0|1:44,3:0.079:47:16,2:27,1:0|1:170301590_C_T:170301590:24,20,2,1	RY1114T6	chr1_170301592_G>T	54	0	44	3	synonymous_variant	LOW	Gm7694	PASS	snv	G>T	G:C>T:A	1	PASS
chr1	170849054	.	CAG	C	.	base_qual;clustered_events;germline;haplotype;weak_evidence	AS_FilterStatus=weak_evidence,base_qual;AS_SB_TABLE=9,2|1,0;DP=12;ECNT=3;GERMQ=1;MBQ=35,17;MFRL=159,202;MMQ=60,60;MPOS=31;NALOD=1.000;NLOD=2.71;POPAF=6.00;TLOD=3.42;ANN=C|intron_variant|MODIFIER|Atf6|ENSMUSG00000026663|transcript|ENSMUST00000027974|protein_coding|4/15|c.318+61_318+62delCT||||||	GT:AD:AF:DP:F1R2:F2R1:PGT:PID:PS:SB	0|0:9,0:0.091:9:3,0:3,0:0|1:170849054_CAG_C:170849054:7,2,0,0	0|1:2,1:0.400:3:1,0:1,0:0|1:170849054_CAG_C:170849054:2,0,1,0	RY1114T6	chr1_170849054_CAG>C	9	0	2	1	intron_variant	MODIFIER	Atf6	.	indel	.	.	1	.
chr1	170849056	.	G	GCCC	.	base_qual;clustered_events;germline;haplotype;weak_evidence	AS_FilterStatus=weak_evidence,base_qual;AS_SB_TABLE=9,2|1,0;DP=12;ECNT=3;GERMQ=1;MBQ=36,0;MFRL=159,202;MMQ=60,60;MPOS=30;NALOD=1.000;NLOD=2.71;POPAF=6.00;RPA=5,8;RU=C;STR;STRQ=93;TLOD=3.42;ANN=GCCC|intron_variant|MODIFIER|Atf6|ENSMUSG00000026663|transcript|ENSMUST00000027974|protein_coding|4/15|c.318+58_318+60dupGGG||||||	GT:AD:AF:DP:F1R2:F2R1:PGT:PID:PS:SB	0|0:9,0:0.091:9:3,0:5,0:0|1:170849054_CAG_C:170849054:7,2,0,0	0|1:2,1:0.400:3:1,0:1,0:0|1:170849054_CAG_C:170849054:2,0,1,0	RY1114T6	chr1_170849056_G>GCCC	9	0	2	1	intron_variant	MODIFIER	Atf6	.	indel	.	.	1	.
chr1	170849062	.	A	C	.	base_qual;clustered_events;haplotype;weak_evidence	AS_FilterStatus=weak_evidence,base_qual;AS_SB_TABLE=10,2|1,0;DP=13;ECNT=3;GERMQ=27;MBQ=35,11;MFRL=160,202;MMQ=60,60;MPOS=22;NALOD=1.000;NLOD=2.71;POPAF=6.00;TLOD=3.20;ANN=C|intron_variant|MODIFIER|Atf6|ENSMUSG00000026663|transcript|ENSMUST00000027974|protein_coding|4/15|c.318+55T>G||||||	GT:AD:AF:DP:F1R2:F2R1:PGT:PID:PS:SB	0|0:9,0:0.091:9:3,0:5,0:0|1:170849054_CAG_C:170849054:7,2,0,0	0|1:3,1:0.333:4:1,0:1,0:0|1:170849054_CAG_C:170849054:3,0,1,0	RY1114T6	chr1_170849062_A>C	9	0	3	1	intron_variant	MODIFIER	Atf6	.	snv	A>C	A:T>C:G	1	.
chr1	171217453	.	G	T	.	weak_evidence	AS_FilterStatus=weak_evidence;AS_SB_TABLE=23,36|1,1;DP=62;ECNT=1;GERMQ=93;MBQ=20,37;MFRL=136,147;MMQ=60,60;MPOS=15;NALOD=1.35;NLOD=6.32;POPAF=6.00;TLOD=4.58;ANN=T|downstream_gene_variant|MODIFIER|Tomm40l|ENSMUSG00000005674|transcript|ENSMUST00000005817|protein_coding||c.*2068C>A|||||349|,T|intron_variant|MODIFIER|Nr1i3|ENSMUSG00000005677|transcript|ENSMUST00000005820|protein_coding|7/8|c.841+23G>…	GT:AD:AF:DP:F1R2:F2R1:SB	0/0:30,0:0.043:30:15,0:14,0:11,19,0,0	0/1:29,2:0.121:31:7,0:20,2:12,17,1,1	RY1114T6	chr1_171217453_G>T	30	0	29	2	downstream_gene_variant	MODIFIER	Tomm40l	.	snv	G>T	G:C>T:A	1	.
chr1	171636210	.	TC	T	.	normal_artifact;slippage;weak_evidence	AS_FilterStatus=weak_evidence;AS_SB_TABLE=26,5|4,1;DP=41;ECNT=1;GERMQ=3;MBQ=33,33;MFRL=156,146;MMQ=60,60;MPOS=26;NALOD=-3.256e-01;NLOD=2.27;POPAF=6.00;RPA=11,10;RU=C;STR;STRQ=1;TLOD=3.80;ANN=T|intron_variant|MODIFIER|Slamf7|ENSMUSG00000038179|transcript|ENSMUST00000111276|protein_coding|6/6|c.930+101delG||||||	GT:AD:AF:DP:F1R2:F2R1:SB	0/0:18,1:0.103:19:7,0:9,1:15,3,1,0	0/1:13,4:0.234:17:4,1:8,3:11,2,3,1	RY1114T6	chr1_171636210_TC>T	18	1	13	4	intron_variant	MODIFIER	Slamf7	.	indel	.	.	2	.
chr1	173526374	.	TG	T	.	normal_artifact;slippage;weak_evidence	AS_FilterStatus=weak_evidence;AS_SB_TABLE=48,10|5,1;DP=69;ECNT=1;GERMQ=55;MBQ=36,36;MFRL=141,141;MMQ=60,60;MPOS=19;NALOD=0.132;NLOD=5.95;POPAF=6.00;RPA=11,10;RU=G;STR;STRQ=1;TLOD=4.98;ANN=T|intron_variant|MODIFIER|BC094916|ENSMUSG00000070501|transcript|ENSMUST00000139092|protein_coding|4/4|c.639+89delC||||||	GT:AD:AF:DP:F1R2:F2R1:SB	0/0:35,1:0.062:36:9,0:23,1:27,8,1,0	0/1:23,5:0.184:28:9,0:13,4:21,2,4,1	RY1114T6	chr1_173526374_TG>T	35	1	23	5	intron_variant	MODIFIER	BC094916	.	indel	.	.	1	.
chr1	173727715	.	C	A	.	PASS	AS_FilterStatus=SITE;AS_SB_TABLE=82,130|2,1;DP=221;ECNT=1;GERMQ=93;MBQ=31,36;MFRL=150,178;MMQ=60,40;MPOS=8;NALOD=1.94;NLOD=25.88;POPAF=6.00;TLOD=5.39;ANN=A|synonymous_variant|LOW|AI607873|ENSMUSG00000073490|transcript|ENSMUST00000042610|protein_coding|6/8|c.2421G>T|p.Leu807Leu|2663/3481|2421/2937|807/978||	GT:AD:AF:DP:F1R2:F2R1:SB	0/0:113,0:0.011:113:42,0:71,0:46,67,0,0	0/1:99,3:0.048:102:36,0:62,3:36,63,2,1	RY1114T6	chr1_173727715_C>A	113	0	99	3	synonymous_variant	LOW	AI607873	PASS	snv	C>A	G:C>T:A	1	PASS
chr1	174117108	.	C	A	.	PASS	AS_FilterStatus=SITE;AS_SB_TABLE=78,50|3,2;DP=138;ECNT=1;GERMQ=93;MBQ=20,35;MFRL=143,154;MMQ=60,60;MPOS=27;NALOD=1.70;NLOD=14.75;POPAF=6.00;TLOD=10.01;ANN=A|missense_variant|MODERATE|Olfr231|ENSMUSG00000046486|transcript|ENSMUST00000063030|protein_coding|1/1|c.907G>T|p.Val303Phe|907/924|907/924|303/307||	GT:AD:AF:DP:F1R2:F2R1:SB	0/0:69,0:0.019:69:29,0:40,0:41,28,0,0	0/1:59,5:0.104:64:17,0:41,5:37,22,3,2	RY1114T6	chr1_174117108_C>A	69	0	59	5	missense_variant	MODERATE	Olfr231	PASS	snv	C>A	G:C>T:A	1	PASS
chr1	174217933	.	G	T	.	PASS	AS_FilterStatus=SITE;AS_SB_TABLE=112,113|1,3;DP=237;ECNT=1;GERMQ=93;MBQ=34,37;MFRL=150,159;MMQ=60,60;MPOS=39;NALOD=2.00;NLOD=29.15;POPAF=6.00;TLOD=8.29;ANN=T|missense_variant|MODERATE|Spta1|ENSMUSG00000026532|transcript|ENSMUST00000027817|protein_coding|33/52|c.4656G>T|p.Gln1552His|4821/8406|4656/7248|1552/2415||	GT:AD:AF:DP:F1R2:F2R1:SB	0/0:130,0:0.010:130:38,0:91,0:67,63,0,0	0/1:95,4:0.061:99:27,1:67,3:45,50,1,3	RY1114T6	chr1_174217933_G>T	130	0	95	4	missense_variant	MODERATE	Spta1	PASS	snv	G>T	G:C>T:A	1	PASS
chr1	175604188	.	C	A	.	weak_evidence	AS_FilterStatus=weak_evidence;AS_SB_TABLE=2,12|1,1;DP=17;ECNT=1;GERMQ=22;MBQ=36,20;MFRL=154,155;MMQ=60,60;MPOS=23;NALOD=0.974;NLOD=2.41;POPAF=6.00;TLOD=3.30;ANN=A|intron_variant|MODIFIER|Fh1|ENSMUSG00000026526|transcript|ENSMUST00000027810|protein_coding|8/9|c.1228-97G>T||||||	GT:AD:AF:DP:F1R2:F2R1:SB	0/0:9,0:0.097:9:1,0:8,0:2,7,0,0	0/1:5,2:0.250:7:1,0:4,2:0,5,1,1	RY1114T6	chr1_175604188_C>A	9	0	5	2	intron_variant	MODIFIER	Fh1	.	snv	C>A	G:C>T:A	1	.
chr1	176735864	.	CT	TG	.	haplotype;normal_artifact	AS_FilterStatus=SITE;AS_SB_TABLE=51,45|1,2;DP=99;ECNT=2;GERMQ=93;MBQ=20,35;MFRL=148,111;MMQ=60,60;MPOS=14;NALOD=-5.819e-01;NLOD=9.37;POPAF=6.00;TLOD=4.83;ANN=TG|missense_variant|MODERATE|Cep170|ENSMUSG00000057335|transcript|ENSMUST00000057037|protein_coding|20/20|c.4552_4553delAGinsCA|p.Ser1518His|4719/6930|4552/4737|1518/1578||	GT:AD:AF:DP:F1R2:F2R1:PGT:PID:PS:SB	0|0:59,1:0.043:60:21,0:36,0:0|1:176735864_CT_TG:176735864:32,27,0,1	0|1:37,2:0.091:39:15,0:20,2:0|1:176735864_CT_TG:176735864:19,18,1,1	RY1114T6	chr1_176735864_CT>TG	59	1	37	2	missense_variant	MODERATE	Cep170	.	indel	.	.	1	.
chr1	176735875	.	A	C	.	haplotype;normal_artifact	AS_FilterStatus=SITE;AS_SB_TABLE=48,45|1,2;DP=99;ECNT=2;GERMQ=93;MBQ=20,36;MFRL=145,111;MMQ=60,60;MPOS=17;NALOD=-6.373e-01;NLOD=8.46;POPAF=6.00;TLOD=4.87;ANN=C|synonymous_variant|LOW|Cep170|ENSMUSG00000057335|transcript|ENSMUST00000057037|protein_coding|20/20|c.4542T>G|p.Val1514Val|4708/6930|4542/4737|1514/1578||	GT:AD:AF:DP:F1R2:F2R1:PGT:PID:PS:SB	0|0:58,1:0.046:59:19,1:38,0:0|1:176735864_CT_TG:176735864:31,27,0,1	0|1:35,2:0.094:37:13,0:22,2:0|1:176735864_CT_TG:176735864:17,18,1,1	RY1114T6	chr1_176735875_A>C	58	1	35	2	synonymous_variant	LOW	Cep170	.	snv	A>C	A:T>C:G	1	.
chr1	177248791	.	CGCTGCTGCTGCT	C	.	PASS	AS_FilterStatus=SITE;AS_SB_TABLE=3,19|1,1;DP=73;ECNT=1;GERMQ=28;MBQ=31,20;MFRL=192,138;MMQ=60,60;MPOS=31;NALOD=0.913;NLOD=2.56;POPAF=6.00;RPA=19,15;RU=GCT;STR;STRQ=93;TLOD=6.90;ANN=C|5_prime_UTR_variant|MODIFIER|Akt3|ENSMUSG00000019699|transcript|ENSMUST00000111159|protein_coding|2/14|c.-82_-71delAGCAGCAGCAGC|||||71|	GT:AD:AF:DP:F1R2:F2R1:SB	0/0:10,0:0.072:10:3,0:1,0:2,8,0,0	0/1:12,2:0.136:14:6,0:3,2:1,11,1,1	RY1114T6	chr1_177248791_CGCTGCTGCTGCT>C	10	0	12	2	5_prime_UTR_variant	MODIFIER	Akt3	.	indel	.	.	1	.
chr1	177860308	.	G	T	.	weak_evidence	AS_FilterStatus=weak_evidence;AS_SB_TABLE=13,12|1,1;DP=27;ECNT=1;GERMQ=37;MBQ=20,20;MFRL=126,114;MMQ=60,60;MPOS=44;NALOD=1.000;NLOD=2.71;POPAF=6.00;TLOD=3.04;ANN=T|intergenic_region|MODIFIER|Adss-Gm16432|ENSMUSG00000015961-ENSMUSG00000091476|intergenic_region|ENSMUSG00000015961-ENSMUSG00000091476|||n.177860308G>T||||||	GT:AD:AF:DP:F1R2:F2R1:SB	0/0:15,0:0.091:15:7,0:8,0:8,7,0,0	0/1:10,2:0.200:12:4,0:6,2:5,5,1,1	RY1114T6	chr1_177860308_G>T	15	0	10	2	intergenic_region	MODIFIER	Adss-Gm16432	.	snv	G>T	G:C>T:A	1	.
chr1	180955924	.	C	A	.	PASS	AS_FilterStatus=SITE;AS_SB_TABLE=53,22|2,1;DP=84;ECNT=1;GERMQ=93;MBQ=32,20;MFRL=155,151;MMQ=60,60;MPOS=15;NALOD=1.47;NLOD=8.13;POPAF=6.00;TLOD=4.78;ANN=A|intron_variant|MODIFIER|Tmem63a|ENSMUSG00000026519|transcript|ENSMUST00000027800|protein_coding|6/22|c.512-69C>A||||||,A|intron_variant|MODIFIER|2210411M09Rik|ENSMUSG00000085563|transcript|ENSMUST00000128545|antisense|1/2|n.162+2064G>T||||||	GT:AD:AF:DP:F1R2:F2R1:SB	0/0:34,0:0.033:34:16,0:18,0:25,9,0,0	0/1:41,3:0.083:44:8,1:32,2:28,13,2,1	RY1114T6	chr1_180955924_C>A	34	0	41	3	intron_variant	MODIFIER	Tmem63a	PASS	snv	C>A	G:C>T:A	1	PASS
chr1	181105175	rs233767290;rs260427818	TA	T	.	normal_artifact;slippage;weak_evidence	AS_FilterStatus=weak_evidence;AS_SB_TABLE=15,30|2,4;ECNT=1;GERMQ=28;MBQ=20,20;MFRL=148,132;MMQ=60,60;MPOS=35;NALOD=0.738;NLOD=4.78;POPAF=6.00;RPA=11,10;RU=A;STR;STRQ=1;TLOD=3.84;CSQ=-|ENSMUSG00000026516|ENSMUST00000191728|Transcript|upstream_gene_variant|||||||30|-1,-|ENSMUSG00000026516|ENSMUST00000027797|Transcript|splice_region_variant&intron_variant||||||||-1;DP=177;DP4=0,0,94,83;INDEL;ANN=T|s…	GT:AD:AF:DP:F1R2:F2R1:SB	0/0:31,2:0.071:33:1,2:29,0:10,21,1,1	0/1:14,4:0.245:18:1,2:13,2:5,9,1,3	RY1114T6	chr1_181105175_TA>T	31	2	14	4	splice_region_variant&intron_variant	LOW	Nvl	.	indel	.	.	1	.
chr1	181142282	.	TG	T	.	normal_artifact;slippage;weak_evidence	AS_FilterStatus=weak_evidence;AS_SB_TABLE=52,2|11,4;DP=76;ECNT=1;GERMQ=15;MBQ=34,32;MFRL=155,146;MMQ=60,60;MPOS=26;NALOD=-2.308e-01;NLOD=4.56;POPAF=6.00;RPA=14,13;RU=G;STR;STRQ=1;TLOD=6.69;ANN=T|intron_variant|MODIFIER|Nvl|ENSMUSG00000026516|transcript|ENSMUST00000027797|protein_coding|2/22|c.131+43delC||||||	GT:AD:AF:DP:F1R2:F2R1:SB	0/0:28,3:0.079:31:11,1:13,2:26,2,3,0	0/1:26,12:0.238:38:8,5:18,5:26,0,8,4	RY1114T6	chr1_181142282_TG>T	28	3	26	12	intron_variant	MODIFIER	Nvl	.	indel	.	.	1	.
chr1	182470893	.	ATC	A	.	normal_artifact;slippage;weak_evidence	AS_FilterStatus=weak_evidence;AS_SB_TABLE=0,37|0,3;DP=72;ECNT=1;GERMQ=21;MBQ=33,33;MFRL=186,179;MMQ=60,60;MPOS=36;NALOD=-9.053e-01;NLOD=2.29;POPAF=6.00;RPA=10,9;RU=TC;STR;STRQ=1;TLOD=3.61;ANN=A|intron_variant|MODIFIER|Capn2|ENSMUSG00000026509|transcript|ENSMUST00000068505|protein_coding|18/20|c.1904-100_1904-99delGA||||||	GT:AD:AF:DP:F1R2:F2R1:SB	0/0:19,1:0.084:20:8,0:8,1:0,19,0,1	0/1:18,2:0.132:20:5,1:12,1:0,18,0,2	RY1114T6	chr1_182470893_ATC>A	19	1	18	2	intron_variant	MODIFIER	Capn2	.	indel	.	.	1	.
chr1	184731566	.	A	C	.	clustered_events;weak_evidence	AS_FilterStatus=weak_evidence;AS_SB_TABLE=19,8|1,1;DP=31;ECNT=4;GERMQ=49;MBQ=20,20;MFRL=142,91;MMQ=60,60;MPOS=13;NALOD=1.16;NLOD=3.87;POPAF=6.00;TLOD=3.09;ANN=C|synonymous_variant|LOW|Hlx|ENSMUSG00000039377|transcript|ENSMUST00000048572|protein_coding|1/4|c.576T>G|p.Thr192Thr|1054/2278|576/1431|192/476||	GT:AD:AF:DP:F1R2:F2R1:SB	0/0:17,0:0.065:17:6,0:10,0:12,5,0,0	0/1:10,2:0.200:12:1,0:9,2:7,3,1,1	RY1114T6	chr1_184731566_A>C	17	0	10	2	synonymous_variant	LOW	Hlx	.	snv	A>C	A:T>C:G	1	.
chr1	184731578	.	C	T	.	clustered_events;haplotype	AS_FilterStatus=SITE;AS_SB_TABLE=21,10|1,1;DP=33;ECNT=4;GERMQ=55;MBQ=20,20;MFRL=142,91;MMQ=60,60;MPOS=25;NALOD=1.18;NLOD=4.21;POPAF=6.00;TLOD=7.05;ANN=T|synonymous_variant|LOW|Hlx|ENSMUSG00000039377|transcript|ENSMUST00000048572|protein_coding|1/4|c.564G>A|p.Lys188Lys|1042/2278|564/1431|188/476||	GT:AD:AF:DP:F1R2:F2R1:PGT:PID:PS:SB	0|0:20,0:0.063:20:7,0:13,0:0|1:184731578_C_T:184731578:13,7,0,0	0|1:11,2:0.182:13:1,0:10,2:0|1:184731578_C_T:184731578:8,3,1,1	RY1114T6	chr1_184731578_C>T	20	0	11	2	synonymous_variant	LOW	Hlx	.	snv	C>T	G:C>A:T	1	.
chr1	184731581	.	A	G	.	clustered_events;haplotype	AS_FilterStatus=SITE;AS_SB_TABLE=21,10|1,1;DP=33;ECNT=4;GERMQ=55;MBQ=20,20;MFRL=142,91;MMQ=60,60;MPOS=28;NALOD=1.18;NLOD=4.21;POPAF=6.00;TLOD=7.05;ANN=G|synonymous_variant|LOW|Hlx|ENSMUSG00000039377|transcript|ENSMUST00000048572|protein_coding|1/4|c.561T>C|p.Val187Val|1039/2278|561/1431|187/476||	GT:AD:AF:DP:F1R2:F2R1:PGT:PID:PS:SB	0|0:20,0:0.063:20:7,0:13,0:0|1:184731578_C_T:184731578:13,7,0,0	0|1:11,2:0.182:13:1,0:9,2:0|1:184731578_C_T:184731578:8,3,1,1	RY1114T6	chr1_184731581_A>G	20	0	11	2	synonymous_variant	LOW	Hlx	.	snv	A>G	A:T>G:C	1	.
chr1	184731599	.	C	T	.	clustered_events	AS_FilterStatus=SITE;AS_SB_TABLE=22,15|1,1;DP=39;ECNT=4;GERMQ=64;MBQ=20,20;MFRL=139,91;MMQ=60,60;MPOS=45;NALOD=1.23;NLOD=4.82;POPAF=6.00;TLOD=7.05;ANN=T|synonymous_variant|LOW|Hlx|ENSMUSG00000039377|transcript|ENSMUST00000048572|protein_coding|1/4|c.543G>A|p.Ala181Ala|1021/2278|543/1431|181/476||	GT:AD:AF:DP:F1R2:F2R1:SB	0/0:25,0:0.056:25:8,0:14,0:14,11,0,0	0/1:12,2:0.182:14:1,0:11,2:8,4,1,1	RY1114T6	chr1_184731599_C>T	25	0	12	2	synonymous_variant	LOW	Hlx	.	snv	C>T	G:C>A:T	1	.
chr1	190783599	.	GG	AA	.	clustered_events	AS_FilterStatus=SITE;AS_SB_TABLE=37,57|2,1;DP=101;ECNT=3;GERMQ=93;MBQ=20,20;MFRL=150,92;MMQ=60,60;MPOS=27;NALOD=1.51;NLOD=9.33;POPAF=6.00;TLOD=5.85;ANN=AA|synonymous_variant|LOW|Rps6kc1|ENSMUSG00000089872|transcript|ENSMUST00000061611|protein_coding|13/15|c.2928_2929delCCinsTT|p.978|3039/3995|2928/3171|976/1056||	GT:AD:AF:DP:F1R2:F2R1:SB	0/0:44,0:0.030:44:16,0:27,0:18,26,0,0	0/1:50,3:0.051:53:13,0:37,3:19,31,2,1	RY1114T6	chr1_190783599_GG>AA	44	0	50	3	synonymous_variant	LOW	Rps6kc1	PASS	indel	.	.	1	.
chr1	190783630	.	T	A	.	clustered_events;haplotype	AS_FilterStatus=SITE;AS_SB_TABLE=25,44|1,1;DP=72;ECNT=3;GERMQ=93;MBQ=20,20;MFRL=149,92;MMQ=60,60;MPOS=38;NALOD=1.38;NLOD=6.92;POPAF=6.00;TLOD=6.11;ANN=A|synonymous_variant|LOW|Rps6kc1|ENSMUSG00000089872|transcript|ENSMUST00000061611|protein_coding|13/15|c.2898A>T|p.Thr966Thr|3008/3995|2898/3171|966/1056||	GT:AD:AF:DP:F1R2:F2R1:PGT:PID:PS:SB	0|0:31,0:0.040:31:12,0:18,0:0|1:190783630_T_A:190783630:10,21,0,0	0|1:38,2:0.068:40:10,0:28,2:0|1:190783630_T_A:190783630:15,23,1,1	RY1114T6	chr1_190783630_T>A	31	0	38	2	synonymous_variant	LOW	Rps6kc1	.	snv	T>A	A:T>T:A	1	.
chr1	190783635	.	C	T	.	clustered_events;haplotype	AS_FilterStatus=SITE;AS_SB_TABLE=24,43|1,2;DP=70;ECNT=3;GERMQ=93;MBQ=23,20;MFRL=149,92;MMQ=60,60;MPOS=33;NALOD=1.36;NLOD=6.62;POPAF=6.00;TLOD=6.11;ANN=T|missense_variant|MODERATE|Rps6kc1|ENSMUSG00000089872|transcript|ENSMUST00000061611|protein_coding|13/15|c.2893G>A|p.Val965Ile|3003/3995|2893/3171|965/1056||	GT:AD:AF:DP:F1R2:F2R1:PGT:PID:PS:SB	0|0:29,0:0.042:29:10,0:15,0:0|1:190783630_T_A:190783630:9,20,0,0	0|1:38,3:0.068:41:9,0:25,2:0|1:190783630_T_A:190783630:15,23,1,2	RY1114T6	chr1_190783635_C>T	29	0	38	3	missense_variant	MODERATE	Rps6kc1	PASS	snv	C>T	G:C>A:T	1	.
chr1	191993148	.	C	A	.	strand_bias;weak_evidence	AS_FilterStatus=weak_evidence,strand_bias;AS_SB_TABLE=36,50|0,2;DP=89;ECNT=1;GERMQ=93;MBQ=29,36;MFRL=148,166;MMQ=60,60;MPOS=34;NALOD=1.56;NLOD=10.53;POPAF=6.00;TLOD=3.86;ANN=A|upstream_gene_variant|MODIFIER|Gm26670|ENSMUSG00000097416|transcript|ENSMUST00000180429|antisense||n.-3027G>T|||||3027|,A|downstream_gene_variant|MODIFIER|Rd3|ENSMUSG00000049353|transcript|ENSMUST00000053463|protein_coding|…	GT:AD:AF:DP:F1R2:F2R1:SB	0/0:46,0:0.027:46:24,0:22,0:20,26,0,0	0/1:40,2:0.083:42:19,2:21,0:16,24,0,2	RY1114T6	chr1_191993148_C>A	46	0	40	2	upstream_gene_variant	MODIFIER	Gm26670	.	snv	C>A	G:C>T:A	1	.
chr1	192116482	.	G	A	.	weak_evidence	AS_FilterStatus=weak_evidence;AS_SB_TABLE=1,13|1,1;DP=19;ECNT=1;GERMQ=25;MBQ=36,20;MFRL=229,145;MMQ=60,60;MPOS=28;NALOD=0.992;NLOD=2.41;POPAF=6.00;TLOD=3.17;ANN=A|intron_variant|MODIFIER|Rcor3|ENSMUSG00000037395|transcript|ENSMUST00000073279|protein_coding|8/9|c.934-136C>T||||||	GT:AD:AF:DP:F1R2:F2R1:SB	0/0:8,0:0.094:8:6,0:2,0:1,7,0,0	0/1:6,2:0.219:8:3,2:3,0:0,6,1,1	RY1114T6	chr1_192116482_G>A	8	0	6	2	intron_variant	MODIFIER	Rcor3	.	snv	G>A	G:C>A:T	1	.
chr1	192851163	.	A	G	.	base_qual;weak_evidence	AS_FilterStatus=weak_evidence,base_qual;AS_SB_TABLE=8,16|0,5;DP=30;ECNT=1;GERMQ=27;MBQ=36,12;MFRL=158,177;MMQ=60,60;MPOS=36;NALOD=1.000;NLOD=2.71;POPAF=6.00;TLOD=3.12;ANN=G|upstream_gene_variant|MODIFIER|Gm15867|ENSMUSG00000089812|transcript|ENSMUST00000159407|antisense||n.-3765A>G|||||3765|,G|intron_variant|MODIFIER|Sertad4|ENSMUSG00000016262|transcript|ENSMUST00000016406|protein_coding|1/3|c.-1…	GT:AD:AF:DP:F1R2:F2R1:SB	0/0:11,0:0.091:11:7,0:3,0:3,8,0,0	0/1:13,5:0.172:18:6,0:4,0:5,8,0,5	RY1114T6	chr1_192851163_A>G	11	0	13	5	upstream_gene_variant	MODIFIER	Gm15867	PASS	snv	A>G	A:T>G:C	1	.
chr1	193157120	.	T	A	.	weak_evidence	AS_FilterStatus=weak_evidence;AS_SB_TABLE=12,1|1,1;DP=16;ECNT=1;GERMQ=23;MBQ=37,20;MFRL=185,162;MMQ=60,60;MPOS=20;NALOD=1.02;NLOD=2.71;POPAF=6.00;TLOD=3.44;ANN=A|intron_variant|MODIFIER|Irf6|ENSMUSG00000026638|transcript|ENSMUST00000076521|protein_coding|1/7|c.-3-96T>A||||||	GT:AD:AF:DP:F1R2:F2R1:SB	0/0:9,0:0.088:9:4,0:5,0:8,1,0,0	0/1:4,2:0.286:6:3,2:1,0:4,0,1,1	RY1114T6	chr1_193157120_T>A	9	0	4	2	intron_variant	MODIFIER	Irf6	.	snv	T>A	A:T>T:A	1	.
chr1	193169347	.	C	T	.	clustered_events;haplotype;normal_artifact	AS_FilterStatus=SITE;AS_SB_TABLE=90,110|4,2;DP=206;ECNT=5;GERMQ=93;MBQ=24,20;MFRL=151,146;MMQ=60,60;MPOS=19;NALOD=-8.176e+00;NLOD=9.08;POPAF=6.00;TLOD=11.64;ANN=T|synonymous_variant|LOW|Irf6|ENSMUSG00000026638|transcript|ENSMUST00000076521|protein_coding|8/8|c.1245C>T|p.Asp415Asp|1436/4131|1245/1404|415/467||,T|upstream_gene_variant|MODIFIER|A130010J15Rik|ENSMUSG00000079144|transcript|ENSMUST0000…	GT:AD:AF:DP:F1R2:F2R1:PGT:PID:PS:SB	0|0:96,3:0.039:99:37,2:55,1:0|1:193169347_C_T:193169347:43,53,2,1	0|1:104,3:0.037:107:34,3:65,0:0|1:193169347_C_T:193169347:47,57,2,1	RY1114T6	chr1_193169347_C>T	96	3	104	3	synonymous_variant	LOW	Irf6	.	snv	C>T	G:C>A:T	1	.
chr1	193169356	.	C	T	.	clustered_events;haplotype;normal_artifact	AS_FilterStatus=SITE;AS_SB_TABLE=79,112|2,3;DP=196;ECNT=5;GERMQ=93;MBQ=30,36;MFRL=151,136;MMQ=60,60;MPOS=29;NALOD=-8.212e+00;NLOD=8.47;POPAF=6.00;TLOD=11.64;ANN=T|synonymous_variant|LOW|Irf6|ENSMUSG00000026638|transcript|ENSMUST00000076521|protein_coding|8/8|c.1254C>T|p.Ser418Ser|1445/4131|1254/1404|418/467||,T|upstream_gene_variant|MODIFIER|A130010J15Rik|ENSMUSG00000079144|transcript|ENSMUST0000…	GT:AD:AF:DP:F1R2:F2R1:PGT:PID:PS:SB	0|0:90,2:0.040:92:35,1:50,1:0|1:193169347_C_T:193169347:38,52,1,1	0|1:101,3:0.037:104:33,3:63,0:0|1:193169347_C_T:193169347:41,60,1,2	RY1114T6	chr1_193169356_C>T	90	2	101	3	synonymous_variant	LOW	Irf6	.	snv	C>T	G:C>A:T	1	.
chr1	193169359	.	T	C	.	clustered_events;haplotype;normal_artifact	AS_FilterStatus=SITE;AS_SB_TABLE=75,107|2,3;DP=191;ECNT=5;GERMQ=93;MBQ=34,37;MFRL=152,136;MMQ=60,60;MPOS=27;NALOD=-8.266e+00;NLOD=7.57;POPAF=6.00;TLOD=11.70;ANN=C|synonymous_variant|LOW|Irf6|ENSMUSG00000026638|transcript|ENSMUST00000076521|protein_coding|8/8|c.1257T>C|p.Val419Val|1448/4131|1257/1404|419/467||,C|upstream_gene_variant|MODIFIER|A130010J15Rik|ENSMUSG00000079144|transcript|ENSMUST0000…	GT:AD:AF:DP:F1R2:F2R1:PGT:PID:PS:SB	0|0:89,2:0.042:91:35,1:51,1:0|1:193169347_C_T:193169347:38,51,1,1	0|1:93,3:0.038:96:31,3:57,0:0|1:193169347_C_T:193169347:37,56,1,2	RY1114T6	chr1_193169359_T>C	89	2	93	3	synonymous_variant	LOW	Irf6	.	snv	T>C	A:T>G:C	1	.
chr1	193169374	.	C	A	.	clustered_events;haplotype;normal_artifact	AS_FilterStatus=SITE;AS_SB_TABLE=65,98|1,4;DP=168;ECNT=5;GERMQ=93;MBQ=36,35;MFRL=151,136;MMQ=60,60;MPOS=22;NALOD=-3.942e+00;NLOD=9.36;POPAF=6.00;TLOD=7.28;ANN=A|synonymous_variant|LOW|Irf6|ENSMUSG00000026638|transcript|ENSMUST00000076521|protein_coding|8/8|c.1272C>A|p.Ser424Ser|1463/4131|1272/1404|424/467||,A|upstream_gene_variant|MODIFIER|A130010J15Rik|ENSMUSG00000079144|transcript|ENSMUST000001…	GT:AD:AF:DP:F1R2:F2R1:PGT:PID:PS:SB	0|0:77,2:0.047:79:30,1:44,1:0|1:193169374_C_A:193169374:30,47,0,2	0|1:86,3:0.040:89:33,3:53,0:0|1:193169374_C_A:193169374:35,51,1,2	RY1114T6	chr1_193169374_C>A	77	2	86	3	synonymous_variant	LOW	Irf6	.	snv	C>A	G:C>T:A	1	.
chr1	193169377	.	T	C	.	clustered_events;haplotype;normal_artifact	AS_FilterStatus=SITE;AS_SB_TABLE=64,97|1,4;DP=166;ECNT=5;GERMQ=93;MBQ=35,37;MFRL=152,136;MMQ=60,60;MPOS=25;NALOD=-3.964e+00;NLOD=9.06;POPAF=6.00;TLOD=7.28;ANN=C|synonymous_variant|LOW|Irf6|ENSMUSG00000026638|transcript|ENSMUST00000076521|protein_coding|8/8|c.1275T>C|p.Thr425Thr|1466/4131|1275/1404|425/467||,C|upstream_gene_variant|MODIFIER|A130010J15Rik|ENSMUSG00000079144|transcript|ENSMUST000001…	GT:AD:AF:DP:F1R2:F2R1:PGT:PID:PS:SB	0|0:76,2:0.048:78:32,1:43,1:0|1:193169374_C_A:193169374:30,46,0,2	0|1:85,3:0.040:88:31,3:50,0:0|1:193169374_C_A:193169374:34,51,1,2	RY1114T6	chr1_193169377_T>C	76	2	85	3	synonymous_variant	LOW	Irf6	.	snv	T>C	A:T>G:C	1	.
chr1	193194489	.	T	G	.	base_qual;strand_bias;weak_evidence	AS_FilterStatus=weak_evidence,base_qual,strand_bias;AS_SB_TABLE=48,39|10,0;DP=105;ECNT=1;GERMQ=93;MBQ=20,16;MFRL=156,185;MMQ=60,60;MPOS=29;NALOD=1.23;NLOD=9.44;POPAF=6.00;TLOD=3.11;ANN=G|downstream_gene_variant|MODIFIER|Gm15872|ENSMUSG00000090080|transcript|ENSMUST00000162454|antisense||n.*2478T>G|||||2478|,G|intron_variant|MODIFIER|Traf3ip3|ENSMUSG00000037318|transcript|ENSMUST00000043550|protei…	GT:AD:AF:DP:F1R2:F2R1:SB	0/0:53,4:0.043:57:13,0:21,2:26,27,4,0	0/1:34,6:0.162:40:7,1:14,1:22,12,6,0	RY1114T6	chr1_193194489_T>G	53	4	34	6	downstream_gene_variant	MODIFIER	Gm15872	.	snv	T>G	A:T>C:G	1	.
chr1	195241715	.	G	T	.	normal_artifact;weak_evidence	AS_FilterStatus=weak_evidence;AS_SB_TABLE=68,68|2,3;DP=147;ECNT=1;GERMQ=93;MBQ=28,20;MFRL=149,140;MMQ=60,57;MPOS=19;NALOD=-1.569e+00;NLOD=9.50;POPAF=6.00;TLOD=4.16;ANN=T|upstream_gene_variant|MODIFIER|pRNA|ENSMUSG00000099208|transcript|ENSMUST00000184449|misc_RNA||n.-708C>A|||||708|,T|intergenic_region|MODIFIER|pRNA-CHR_END|ENSMUSG00000099208-CHR_END|intergenic_region|ENSMUSG00000099208-CHR_END||…	GT:AD:AF:DP:F1R2:F2R1:SB	0/0:65,2:0.040:67:32,2:33,0:31,34,1,1	0/1:71,3:0.051:74:37,0:33,3:37,34,1,2	RY1114T6	chr1_195241715_G>T	65	2	71	3	upstream_gene_variant	MODIFIER	pRNA	.	snv	G>T	G:C>T:A	1	.
chr10	3126514	.	T	C	.	weak_evidence	AS_FilterStatus=weak_evidence;AS_SB_TABLE=91,88|2,1;DP=187;ECNT=1;GERMQ=93;MBQ=20,20;MFRL=149,144;MMQ=60,60;MPOS=41;NALOD=1.90;NLOD=23.48;POPAF=6.00;TLOD=4.23;ANN=C|synonymous_variant|LOW|9230019H11Rik|ENSMUSG00000071434|transcript|ENSMUST00000095874|protein_coding|5/6|c.690T>C|p.Ser230Ser|778/2801|690/735|230/244||	GT:AD:AF:DP:F1R2:F2R1:SB	0/0:111,0:0.012:111:73,0:38,0:56,55,0,0	0/1:68,3:0.055:71:46,0:22,3:35,33,2,1	RY1114T6	chr10_3126514_T>C	111	0	68	3	synonymous_variant	LOW	9230019H11Rik	PASS	snv	T>C	A:T>G:C	1	.
chr10	3140609	.	C	A	.	strand_bias;weak_evidence	AS_FilterStatus=weak_evidence,strand_bias;AS_SB_TABLE=14,42|0,2;DP=61;ECNT=1;GERMQ=93;MBQ=35,35;MFRL=149,152;MMQ=60,60;MPOS=9;NALOD=1.32;NLOD=6.02;POPAF=6.00;TLOD=3.72;ANN=A|intergenic_region|MODIFIER|9230019H11Rik-H60c|ENSMUSG00000071434-ENSMUSG00000091618|intergenic_region|ENSMUSG00000071434-ENSMUSG00000091618|||n.3140609C>A||||||	GT:AD:AF:DP:F1R2:F2R1:SB	0/0:24,0:0.045:24:8,0:16,0:5,19,0,0	0/1:32,2:0.107:34:11,1:20,1:9,23,0,2	RY1114T6	chr10_3140609_C>A	24	0	32	2	intergenic_region	MODIFIER	9230019H11Rik-H60c	.	snv	C>A	G:C>T:A	1	.
chr10	4964782	.	G	T	.	PASS	AS_FilterStatus=SITE;AS_SB_TABLE=98,105|3,6;DP=214;ECNT=1;GERMQ=93;MBQ=20,37;MFRL=147,142;MMQ=60,60;MPOS=18;NALOD=1.83;NLOD=20.12;POPAF=6.00;TLOD=19.57;ANN=T|intron_variant|MODIFIER|Esr1|ENSMUSG00000019768|transcript|ENSMUST00000067086|protein_coding|6/8|c.1248-4377G>T||||||	GT:AD:AF:DP:F1R2:F2R1:SB	0/0:98,0:0.015:98:70,0:27,0:44,54,0,0	0/1:105,9:0.099:114:70,7:34,2:54,51,3,6	RY1114T6	chr10_4964782_G>T	98	0	105	9	intron_variant	MODIFIER	Esr1	PASS	snv	G>T	G:C>T:A	1	PASS
chr10	5329588	.	GGA	G	.	slippage;weak_evidence	AS_FilterStatus=weak_evidence;AS_SB_TABLE=0,18|0,2;ECNT=1;GERMQ=4;MBQ=35,36;MFRL=188,215;MMQ=60,60;MPOS=38;NALOD=1.20;NLOD=2.95;POPAF=6.00;RPA=13,12;RU=GA;STR;STRQ=1;TLOD=3.94;CSQ=-||||intergenic_variant||||||||;DP=103;DP4=0,0,79,24;INDEL;ANN=G|intergenic_region|MODIFIER|Gm10097-Syne1|ENSMUSG00000096553-ENSMUSG00000096054|intergenic_region|ENSMUSG00000096553-ENSMUSG00000096054|||n.5329589_5329590…	GT:AD:AF:DP:F1R2:F2R1:SB	0/0:10,0:0.066:10:8,0:2,0:0,10,0,0	0/1:8,2:0.244:10:4,1:3,1:0,8,0,2	RY1114T6	chr10_5329588_GGA>G	10	0	8	2	intergenic_region	MODIFIER	Gm10097-Syne1	.	indel	.	.	1	.
chr10	5356681	.	G	T	.	PASS	AS_FilterStatus=SITE;AS_SB_TABLE=88,65|3,2;DP=170;ECNT=1;GERMQ=93;MBQ=20,35;MFRL=146,177;MMQ=60,60;MPOS=32;NALOD=1.84;NLOD=20.17;POPAF=6.00;TLOD=9.94;ANN=T|missense_variant|MODERATE|Syne1|ENSMUSG00000096054|transcript|ENSMUST00000041639|protein_coding|20/32|c.2360C>A|p.Ser787Tyr|2792/6982|2360/4296|787/1431||,T|upstream_gene_variant|MODIFIER|Gm23573|ENSMUSG00000094906|transcript|ENSMUST0000010440…	GT:AD:AF:DP:F1R2:F2R1:SB	0/0:91,0:0.014:91:46,0:43,0:52,39,0,0	0/1:62,5:0.094:67:43,5:18,0:36,26,3,2	RY1114T6	chr10_5356681_G>T	91	0	62	5	missense_variant	MODERATE	Syne1	PASS	snv	G>T	G:C>T:A	1	PASS
chr10	7126803	.	T	C	.	strand_bias;weak_evidence	AS_FilterStatus=weak_evidence,strand_bias;AS_SB_TABLE=54,66|0,2;DP=123;ECNT=1;GERMQ=93;MBQ=20,36;MFRL=144,158;MMQ=60,60;MPOS=32;NALOD=1.65;NLOD=13.24;POPAF=6.00;TLOD=3.55;ANN=C|missense_variant|MODERATE|Cnksr3|ENSMUSG00000015202|transcript|ENSMUST00000015346|protein_coding|11/13|c.1111A>G|p.Ser371Gly|1665/3447|1111/1668|371/555||	GT:AD:AF:DP:F1R2:F2R1:SB	0/0:67,0:0.022:67:37,0:30,0:28,39,0,0	0/1:53,2:0.071:55:39,2:14,0:26,27,0,2	RY1114T6	chr10_7126803_T>C	67	0	53	2	missense_variant	MODERATE	Cnksr3	.	snv	T>C	A:T>G:C	1	.
chr10	8727864	.	C	G	.	clustered_events;haplotype;weak_evidence	AS_FilterStatus=weak_evidence;AS_SB_TABLE=64,41|1,1;DP=109;ECNT=15;GERMQ=93;MBQ=20,27;MFRL=148,124;MMQ=60,60;MPOS=7;NALOD=1.57;NLOD=10.84;POPAF=6.00;TLOD=4.37;ANN=G|synonymous_variant|LOW|Sash1|ENSMUSG00000015305|transcript|ENSMUST00000015449|protein_coding|19/20|c.3423G>C|p.Arg1141Arg|3635/7183|3423/3693|1141/1230||	GT:AD:AF:DP:F1R2:F2R1:PGT:PID:PS:SB	0|0:50,0:0.026:50:28,0:20,0:0|1:8727864_C_G:8727864:29,21,0,0	0|1:55,2:0.065:57:25,0:28,2:0|1:8727864_C_G:8727864:35,20,1,1	RY1114T6	chr10_8727864_C>G	50	0	55	2	synonymous_variant	LOW	Sash1	.	snv	C>G	G:C>C:G	1	.
chr10	8727867	.	A	G	.	clustered_events;haplotype;weak_evidence	AS_FilterStatus=weak_evidence;AS_SB_TABLE=65,43|1,1;DP=110;ECNT=15;GERMQ=93;MBQ=20,29;MFRL=148,124;MMQ=60,60;MPOS=10;NALOD=1.57;NLOD=10.84;POPAF=6.00;TLOD=4.34;ANN=G|synonymous_variant|LOW|Sash1|ENSMUSG00000015305|transcript|ENSMUST00000015449|protein_coding|19/20|c.3420T>C|p.His1140His|3632/7183|3420/3693|1140/1230||	GT:AD:AF:DP:F1R2:F2R1:PGT:PID:PS:SB	0|0:52,0:0.026:52:29,0:19,0:0|1:8727864_C_G:8727864:29,23,0,0	0|1:56,2:0.064:58:24,0:30,2:0|1:8727864_C_G:8727864:36,20,1,1	RY1114T6	chr10_8727867_A>G	52	0	56	2	synonymous_variant	LOW	Sash1	.	snv	A>G	A:T>G:C	1	.
chr10	8727870	.	T	C	.	clustered_events;haplotype;weak_evidence	AS_FilterStatus=weak_evidence;AS_SB_TABLE=65,43|1,1;DP=112;ECNT=15;GERMQ=93;MBQ=20,28;MFRL=148,124;MMQ=60,60;MPOS=13;NALOD=1.56;NLOD=10.54;POPAF=6.00;TLOD=4.34;ANN=C|synonymous_variant|LOW|Sash1|ENSMUSG00000015305|transcript|ENSMUST00000015449|protein_coding|19/20|c.3417A>G|p.Gln1139Gln|3629/7183|3417/3693|1139/1230||	GT:AD:AF:DP:F1R2:F2R1:PGT:PID:PS:SB	0|0:51,0:0.027:51:29,0:22,0:0|1:8727864_C_G:8727864:29,22,0,0	0|1:57,2:0.064:59:27,0:29,2:0|1:8727864_C_G:8727864:36,21,1,1	RY1114T6	chr10_8727870_T>C	51	0	57	2	synonymous_variant	LOW	Sash1	.	snv	T>C	A:T>G:C	1	.
chr10	8727883	.	A	T	.	clustered_events	AS_FilterStatus=SITE;AS_SB_TABLE=63,48|2,2;DP=116;ECNT=15;GERMQ=93;MBQ=20,29;MFRL=154,122;MMQ=60,60;MPOS=18;NALOD=1.57;NLOD=10.84;POPAF=6.00;TLOD=6.50;ANN=T|missense_variant|MODERATE|Sash1|ENSMUSG00000015305|transcript|ENSMUST00000015449|protein_coding|19/20|c.3404T>A|p.Leu1135Gln|3616/7183|3404/3693|1135/1230||	GT:AD:AF:DP:F1R2:F2R1:SB	0/0:50,0:0.026:50:27,0:23,0:24,26,0,0	0/1:61,4:0.097:65:27,1:34,3:39,22,2,2	RY1114T6	chr10_8727883_A>T	50	0	61	4	missense_variant	MODERATE	Sash1	PASS	snv	A>T	A:T>T:A	1	.
chr10	8727911	.	T	C	.	clustered_events;haplotype	AS_FilterStatus=SITE;AS_SB_TABLE=53,47|2,2;DP=104;ECNT=15;GERMQ=93;MBQ=34,32;MFRL=155,122;MMQ=60,60;MPOS=43;NALOD=1.54;NLOD=10.23;POPAF=6.00;TLOD=10.89;ANN=C|missense_variant|MODERATE|Sash1|ENSMUSG00000015305|transcript|ENSMUST00000015449|protein_coding|19/20|c.3376A>G|p.Thr1126Ala|3588/7183|3376/3693|1126/1230||	GT:AD:AF:DP:F1R2:F2R1:PGT:PID:PS:SB	0|0:41,0:0.028:41:21,0:19,0:0|1:8727911_T_C:8727911:19,22,0,0	0|1:59,4:0.094:63:23,1:36,3:0|1:8727911_T_C:8727911:34,25,2,2	RY1114T6	chr10_8727911_T>C	41	0	59	4	missense_variant	MODERATE	Sash1	PASS	snv	T>C	A:T>G:C	1	.
chr10	8727915	.	A	G	.	clustered_events;haplotype	AS_FilterStatus=SITE;AS_SB_TABLE=52,51|2,2;DP=107;ECNT=15;GERMQ=93;MBQ=34,34;MFRL=155,122;MMQ=60,60;MPOS=43;NALOD=1.54;NLOD=10.23;POPAF=6.00;TLOD=10.84;ANN=G|synonymous_variant|LOW|Sash1|ENSMUSG00000015305|transcript|ENSMUST00000015449|protein_coding|19/20|c.3372T>C|p.Val1124Val|3584/7183|3372/3693|1124/1230||	GT:AD:AF:DP:F1R2:F2R1:PGT:PID:PS:SB	0|0:41,0:0.028:41:21,0:18,0:0|1:8727911_T_C:8727911:18,23,0,0	0|1:62,4:0.093:66:26,1:35,3:0|1:8727911_T_C:8727911:34,28,2,2	RY1114T6	chr10_8727915_A>G	41	0	62	4	synonymous_variant	LOW	Sash1	PASS	snv	A>G	A:T>G:C	1	.
chr10	8727918	.	A	G	.	clustered_events;haplotype	AS_FilterStatus=SITE;AS_SB_TABLE=51,52|2,2;DP=107;ECNT=15;GERMQ=93;MBQ=33,34;MFRL=155,122;MMQ=60,60;MPOS=41;NALOD=1.54;NLOD=10.23;POPAF=6.00;TLOD=10.84;ANN=G|synonymous_variant|LOW|Sash1|ENSMUSG00000015305|transcript|ENSMUST00000015449|protein_coding|19/20|c.3369T>C|p.Asp1123Asp|3581/7183|3369/3693|1123/1230||	GT:AD:AF:DP:F1R2:F2R1:PGT:PID:PS:SB	0|0:41,0:0.028:41:21,0:18,0:0|1:8727911_T_C:8727911:18,23,0,0	0|1:62,4:0.093:66:26,1:36,3:0|1:8727911_T_C:8727911:33,29,2,2	RY1114T6	chr10_8727918_A>G	41	0	62	4	synonymous_variant	LOW	Sash1	PASS	snv	A>G	A:T>G:C	1	.
chr10	8727923	.	T	G	.	clustered_events;haplotype	AS_FilterStatus=SITE;AS_SB_TABLE=48,54|2,2;DP=106;ECNT=15;GERMQ=93;MBQ=35,35;MFRL=155,122;MMQ=60,60;MPOS=41;NALOD=1.56;NLOD=10.54;POPAF=6.00;TLOD=10.84;ANN=G|synonymous_variant|LOW|Sash1|ENSMUSG00000015305|transcript|ENSMUST00000015449|protein_coding|19/20|c.3364A>C|p.Arg1122Arg|3576/7183|3364/3693|1122/1230||	GT:AD:AF:DP:F1R2:F2R1:PGT:PID:PS:SB	0|0:41,0:0.027:41:18,0:20,0:0|1:8727911_T_C:8727911:18,23,0,0	0|1:61,4:0.093:65:25,1:35,3:0|1:8727911_T_C:8727911:30,31,2,2	RY1114T6	chr10_8727923_T>G	41	0	61	4	synonymous_variant	LOW	Sash1	PASS	snv	T>G	A:T>C:G	1	.
chr10	8727927	.	A	G	.	clustered_events;haplotype	AS_FilterStatus=SITE;AS_SB_TABLE=46,56|2,2;DP=106;ECNT=15;GERMQ=93;MBQ=35,34;MFRL=155,122;MMQ=60,60;MPOS=38;NALOD=1.56;NLOD=10.54;POPAF=6.00;TLOD=10.89;ANN=G|synonymous_variant|LOW|Sash1|ENSMUSG00000015305|transcript|ENSMUST00000015449|protein_coding|19/20|c.3360T>C|p.Pro1120Pro|3572/7183|3360/3693|1120/1230||	GT:AD:AF:DP:F1R2:F2R1:PGT:PID:PS:SB	0|0:41,0:0.027:41:19,0:21,0:0|1:8727911_T_C:8727911:19,22,0,0	0|1:61,4:0.094:65:24,1:32,3:0|1:8727911_T_C:8727911:27,34,2,2	RY1114T6	chr10_8727927_A>G	41	0	61	4	synonymous_variant	LOW	Sash1	PASS	snv	A>G	A:T>G:C	1	.
chr10	8727933	.	C	A	.	clustered_events;haplotype	AS_FilterStatus=SITE;AS_SB_TABLE=47,53|2,2;DP=104;ECNT=15;GERMQ=93;MBQ=27,36;MFRL=156,122;MMQ=60,60;MPOS=32;NALOD=1.57;NLOD=10.84;POPAF=6.00;TLOD=11.12;ANN=A|missense_variant|MODERATE|Sash1|ENSMUSG00000015305|transcript|ENSMUST00000015449|protein_coding|19/20|c.3354G>T|p.Glu1118Asp|3566/7183|3354/3693|1118/1230||	GT:AD:AF:DP:F1R2:F2R1:PGT:PID:PS:SB	0|0:43,0:0.026:43:21,0:20,0:0|1:8727911_T_C:8727911:20,23,0,0	0|1:57,4:0.104:61:25,1:31,3:0|1:8727911_T_C:8727911:27,30,2,2	RY1114T6	chr10_8727933_C>A	43	0	57	4	missense_variant	MODERATE	Sash1	PASS	snv	C>A	G:C>T:A	1	.
chr10	8727936	.	T	C	.	clustered_events;haplotype	AS_FilterStatus=SITE;AS_SB_TABLE=47,56|2,2;DP=107;ECNT=15;GERMQ=93;MBQ=31,37;MFRL=157,122;MMQ=60,60;MPOS=29;NALOD=1.57;NLOD=10.84;POPAF=6.00;TLOD=11.07;ANN=C|synonymous_variant|LOW|Sash1|ENSMUSG00000015305|transcript|ENSMUST00000015449|protein_coding|19/20|c.3351A>G|p.Leu1117Leu|3563/7183|3351/3693|1117/1230||	GT:AD:AF:DP:F1R2:F2R1:PGT:PID:PS:SB	0|0:42,0:0.026:42:21,0:20,0:0|1:8727911_T_C:8727911:19,23,0,0	0|1:61,4:0.102:65:26,1:31,3:0|1:8727911_T_C:8727911:28,33,2,2	RY1114T6	chr10_8727936_T>C	42	0	61	4	synonymous_variant	LOW	Sash1	PASS	snv	T>C	A:T>G:C	1	.
chr10	8727938	.	G	A	.	clustered_events;haplotype	AS_FilterStatus=SITE;AS_SB_TABLE=47,54|2,2;DP=107;ECNT=15;GERMQ=93;MBQ=20,38;MFRL=157,122;MMQ=60,60;MPOS=27;NALOD=1.56;NLOD=10.54;POPAF=6.00;TLOD=11.12;ANN=A|synonymous_variant|LOW|Sash1|ENSMUSG00000015305|transcript|ENSMUST00000015449|protein_coding|19/20|c.3349C>T|p.Leu1117Leu|3561/7183|3349/3693|1117/1230||	GT:AD:AF:DP:F1R2:F2R1:PGT:PID:PS:SB	0|0:41,0:0.027:41:21,0:19,0:0|1:8727911_T_C:8727911:19,22,0,0	0|1:60,4:0.104:64:28,1:31,3:0|1:8727911_T_C:8727911:28,32,2,2	RY1114T6	chr10_8727938_G>A	41	0	60	4	synonymous_variant	LOW	Sash1	PASS	snv	G>A	G:C>A:T	1	.
chr10	8727957	.	T	C	.	clustered_events;weak_evidence	AS_FilterStatus=weak_evidence;AS_SB_TABLE=38,53|2,1;DP=98;ECNT=15;GERMQ=93;MBQ=20,20;MFRL=157,127;MMQ=60,60;MPOS=14;NALOD=1.51;NLOD=9.33;POPAF=6.00;TLOD=3.61;ANN=C|synonymous_variant|LOW|Sash1|ENSMUSG00000015305|transcript|ENSMUST00000015449|protein_coding|19/20|c.3330A>G|p.Val1110Val|3542/7183|3330/3693|1110/1230||	GT:AD:AF:DP:F1R2:F2R1:SB	0/0:38,0:0.030:38:16,0:22,0:17,21,0,0	0/1:53,3:0.093:56:24,1:29,2:21,32,2,1	RY1114T6	chr10_8727957_T>C	38	0	53	3	synonymous_variant	LOW	Sash1	PASS	snv	T>C	A:T>G:C	1	.
chr10	8727969	.	C	A	.	clustered_events;haplotype;weak_evidence	AS_FilterStatus=weak_evidence;AS_SB_TABLE=34,52|1,1;DP=90;ECNT=15;GERMQ=93;MBQ=30,29;MFRL=155,122;MMQ=60,60;MPOS=6;NALOD=1.52;NLOD=9.33;POPAF=6.00;TLOD=4.23;ANN=A|synonymous_variant|LOW|Sash1|ENSMUSG00000015305|transcript|ENSMUST00000015449|protein_coding|19/20|c.3318G>T|p.Pro1106Pro|3530/7183|3318/3693|1106/1230||	GT:AD:AF:DP:F1R2:F2R1:PGT:PID:PS:SB	0|0:37,0:0.030:37:14,0:22,0:0|1:8727969_C_A:8727969:18,19,0,0	0|1:49,2:0.070:51:21,1:26,1:0|1:8727969_C_A:8727969:16,33,1,1	RY1114T6	chr10_8727969_C>A	37	0	49	2	synonymous_variant	LOW	Sash1	.	snv	C>A	G:C>T:A	1	.
chr10	8727972	.	G	A	.	clustered_events;haplotype;weak_evidence	AS_FilterStatus=weak_evidence;AS_SB_TABLE=34,52|1,1;DP=88;ECNT=15;GERMQ=93;MBQ=36,20;MFRL=156,122;MMQ=60,60;MPOS=6;NALOD=1.50;NLOD=9.03;POPAF=6.00;TLOD=4.23;ANN=A|synonymous_variant|LOW|Sash1|ENSMUSG00000015305|transcript|ENSMUST00000015449|protein_coding|19/20|c.3315C>T|p.Ile1105Ile|3527/7183|3315/3693|1105/1230||	GT:AD:AF:DP:F1R2:F2R1:PGT:PID:PS:SB	0|0:36,0:0.031:36:14,0:22,0:0|1:8727969_C_A:8727969:18,18,0,0	0|1:50,2:0.070:52:20,1:28,0:0|1:8727969_C_A:8727969:16,34,1,1	RY1114T6	chr10_8727972_G>A	36	0	50	2	synonymous_variant	LOW	Sash1	.	snv	G>A	G:C>A:T	1	.
chr10	9784227	.	G	T	.	clustered_events;haplotype;weak_evidence	AS_FilterStatus=weak_evidence;AS_SB_TABLE=11,44|1,1;DP=59;ECNT=3;GERMQ=93;MBQ=35,20;MFRL=145,168;MMQ=60,60;MPOS=16;NALOD=1.48;NLOD=8.72;POPAF=6.00;TLOD=4.38;ANN=T|missense_variant|MODERATE|Stxbp5|ENSMUSG00000019790|transcript|ENSMUST00000038213|protein_coding|21/28|c.2218C>A|p.Gln740Lys|2218/8825|2218/3459|740/1152||	GT:AD:AF:DP:F1R2:F2R1:PGT:PID:PS:SB	0|0:34,0:0.032:34:19,0:15,0:0|1:9784227_G_T:9784227:5,29,0,0	0|1:21,2:0.105:23:6,0:15,2:0|1:9784227_G_T:9784227:6,15,1,1	RY1114T6	chr10_9784227_G>T	34	0	21	2	missense_variant	MODERATE	Stxbp5	.	snv	G>T	G:C>T:A	1	.
chr10	9784243	.	T	C	.	clustered_events;haplotype;weak_evidence	AS_FilterStatus=weak_evidence;AS_SB_TABLE=3,26|0,1;DP=30;ECNT=3;GERMQ=71;MBQ=33,39;MFRL=166,168;MMQ=60,60;MPOS=43;NALOD=1.20;NLOD=4.52;POPAF=6.00;TLOD=4.60;ANN=C|splice_region_variant&intron_variant|LOW|Stxbp5|ENSMUSG00000019790|transcript|ENSMUST00000038213|protein_coding|20/27|c.2210-8A>G||||||	GT:AD:AF:DP:F1R2:F2R1:PGT:PID:PS:SB	0|0:16,0:0.059:16:9,0:7,0:0|1:9784227_G_T:9784227:1,15,0,0	0|1:13,1:0.133:14:4,0:7,1:0|1:9784227_G_T:9784227:2,11,0,1	RY1114T6	chr10_9784243_T>C	16	0	13	1	splice_region_variant&intron_variant	LOW	Stxbp5	.	snv	T>C	A:T>G:C	1	.
chr10	9784252	.	A	G	.	clustered_events;haplotype;weak_evidence	AS_FilterStatus=weak_evidence;AS_SB_TABLE=3,19|0,1;DP=23;ECNT=3;GERMQ=50;MBQ=34,37;MFRL=162,168;MMQ=60,60;MPOS=48;NALOD=1.04;NLOD=3.01;POPAF=6.00;TLOD=4.74;ANN=G|intron_variant|MODIFIER|Stxbp5|ENSMUSG00000019790|transcript|ENSMUST00000038213|protein_coding|20/27|c.2210-17T>C||||||	GT:AD:AF:DP:F1R2:F2R1:PGT:PID:PS:SB	0|0:11,0:0.083:11:5,0:4,0:0|1:9784227_G_T:9784227:1,10,0,0	0|1:11,1:0.154:12:3,0:6,1:0|1:9784227_G_T:9784227:2,9,0,1	RY1114T6	chr10_9784252_A>G	11	0	11	1	intron_variant	MODIFIER	Stxbp5	.	snv	A>G	A:T>G:C	1	.
chr10	10406230	.	A	G	.	weak_evidence	AS_FilterStatus=weak_evidence;AS_SB_TABLE=0,14|1,1;DP=16;ECNT=1;GERMQ=25;MBQ=35,20;MFRL=181,137;MMQ=60,60;MPOS=22;NALOD=0.954;NLOD=2.41;POPAF=6.00;TLOD=3.15;ANN=G|intron_variant|MODIFIER|Adgb|ENSMUSG00000050994|transcript|ENSMUST00000179956|protein_coding|15/36|c.1753-94T>C||||||	GT:AD:AF:DP:F1R2:F2R1:SB	0/0:8,0:0.100:8:3,0:5,0:0,8,0,0	0/1:6,2:0.222:8:6,0:0,2:0,6,1,1	RY1114T6	chr10_10406230_A>G	8	0	6	2	intron_variant	MODIFIER	Adgb	.	snv	A>G	A:T>G:C	1	.
chr10	10689148	.	C	A	.	weak_evidence	AS_FilterStatus=weak_evidence;AS_SB_TABLE=38,32|1,1;DP=74;ECNT=1;GERMQ=93;MBQ=36,37;MFRL=164,171;MMQ=60,60;MPOS=31;NALOD=1.51;NLOD=9.33;POPAF=6.00;TLOD=4.31;ANN=A|missense_variant|MODERATE|Grm1|ENSMUSG00000019828|transcript|ENSMUST00000044306|protein_coding|9/9|c.3415G>T|p.Ala1139Ser|3841/6930|3415/3600|1139/1199||	GT:AD:AF:DP:F1R2:F2R1:SB	0/0:41,0:0.030:41:16,0:25,0:26,15,0,0	0/1:29,2:0.100:31:15,2:14,0:12,17,1,1	RY1114T6	chr10_10689148_C>A	41	0	29	2	missense_variant	MODERATE	Grm1	.	snv	C>A	G:C>T:A	1	.
chr10	15521244	.	C	A	.	weak_evidence	AS_FilterStatus=weak_evidence;AS_SB_TABLE=4,8|1,1;DP=14;ECNT=1;GERMQ=20;MBQ=36,20;MFRL=168,106;MMQ=60,60;MPOS=5;NALOD=0.954;NLOD=2.41;POPAF=6.00;TLOD=3.43;ANN=A|intergenic_region|MODIFIER|Gm23892-Gm25382|ENSMUSG00000088730-ENSMUSG00000088436|intergenic_region|ENSMUSG00000088730-ENSMUSG00000088436|||n.15521244C>A||||||	GT:AD:AF:DP:F1R2:F2R1:SB	0/0:8,0:0.100:8:3,0:5,0:3,5,0,0	0/1:4,2:0.333:6:3,0:1,2:1,3,1,1	RY1114T6	chr10_15521244_C>A	8	0	4	2	intergenic_region	MODIFIER	Gm23892-Gm25382	.	snv	C>A	G:C>T:A	1	.
chr10	19005106	.	G	A	.	weak_evidence	AS_FilterStatus=weak_evidence;AS_SB_TABLE=101,66|2,1;DP=173;ECNT=1;GERMQ=93;MBQ=20,36;MFRL=147,133;MMQ=60,60;MPOS=15;NALOD=1.87;NLOD=21.67;POPAF=6.00;TLOD=3.33;ANN=A|synonymous_variant|LOW|Tnfaip3|ENSMUSG00000019850|transcript|ENSMUST00000019997|protein_coding|7/9|c.1212C>T|p.Cys404Cys|1485/4422|1212/2328|404/775||	GT:AD:AF:DP:F1R2:F2R1:SB	0/0:101,1:0.013:102:28,0:73,0:63,38,0,1	0/1:66,2:0.052:68:19,0:47,2:38,28,2,0	RY1114T6	chr10_19005106_G>A	101	1	66	2	synonymous_variant	LOW	Tnfaip3	.	snv	G>A	G:C>A:T	1	.
chr10	22709222	.	TA	T	.	normal_artifact;slippage;weak_evidence	AS_FilterStatus=weak_evidence;AS_SB_TABLE=24,58|4,8;DP=113;ECNT=1;GERMQ=55;MBQ=20,23;MFRL=147,155;MMQ=60,60;MPOS=26;NALOD=-1.653e+00;NLOD=3.92;POPAF=6.00;RPA=13,12;RU=A;STR;STRQ=1;TLOD=3.53;ANN=T|downstream_gene_variant|MODIFIER|Slc2a12|ENSMUSG00000037490|transcript|ENSMUST00000042261|protein_coding||c.*7048delA|||||4938|,T|intron_variant|MODIFIER|Tbpl1|ENSMUSG00000071359|transcript|ENSMUST000000…	GT:AD:AF:DP:F1R2:F2R1:SB	0/0:43,4:0.096:47:6,0:32,3:15,28,1,3	0/1:39,8:0.141:47:4,2:30,4:9,30,3,5	RY1114T6	chr10_22709222_TA>T	43	4	39	8	downstream_gene_variant	MODIFIER	Slc2a12	.	indel	.	.	1	.
chr10	23111512	.	C	A	.	weak_evidence	AS_FilterStatus=weak_evidence;AS_SB_TABLE=29,0|2,0;DP=33;ECNT=1;GERMQ=69;MBQ=35,37;MFRL=181,167;MMQ=60,60;MPOS=14;NALOD=1.36;NLOD=6.32;POPAF=6.00;TLOD=5.29;ANN=A|intron_variant|MODIFIER|Eya4|ENSMUSG00000010461|transcript|ENSMUST00000074366|protein_coding|17/18|c.1669+48G>T||||||	GT:AD:AF:DP:F1R2:F2R1:SB	0/0:21,0:0.042:21:6,0:15,0:21,0,0,0	0/1:8,2:0.250:10:2,2:6,0:8,0,2,0	RY1114T6	chr10_23111512_C>A	21	0	8	2	intron_variant	MODIFIER	Eya4	.	snv	C>A	G:C>T:A	1	.
chr10	26107974	.	T	C	.	weak_evidence	AS_FilterStatus=weak_evidence;AS_SB_TABLE=8,15|1,1;DP=26;ECNT=1;GERMQ=33;MBQ=20,20;MFRL=157,163;MMQ=47,47;MPOS=19;NALOD=1.000;NLOD=2.71;POPAF=6.00;TLOD=3.04;ANN=C|intergenic_region|MODIFIER|Gm9767-Samd3|ENSMUSG00000039098-ENSMUSG00000051354|intergenic_region|ENSMUSG00000039098-ENSMUSG00000051354|||n.26107974T>C||||||	GT:AD:AF:DP:F1R2:F2R1:SB	0/0:15,0:0.091:15:6,0:8,0:7,8,0,0	0/1:8,2:0.200:10:3,0:5,2:1,7,1,1	RY1114T6	chr10_26107974_T>C	15	0	8	2	intergenic_region	MODIFIER	Gm9767-Samd3	.	snv	T>C	A:T>G:C	1	.
chr10	27264989	.	C	A	.	PASS	AS_FilterStatus=SITE;AS_SB_TABLE=97,91|10,8;DP=213;ECNT=1;GERMQ=93;MBQ=20,20;MFRL=147,145;MMQ=60,60;MPOS=29;NALOD=1.88;NLOD=22.57;POPAF=6.00;TLOD=40.27;ANN=A|missense_variant|MODERATE|Lama2|ENSMUSG00000019899|transcript|ENSMUST00000092639|protein_coding|14/65|c.2013G>T|p.Met671Ile|2159/9710|2013/9357|671/3118||	GT:AD:AF:DP:F1R2:F2R1:SB	0/0:106,0:0.013:106:35,0:71,0:51,55,0,0	0/1:82,18:0.189:100:23,3:59,15:46,36,10,8	RY1114T6	chr10_27264989_C>A	106	0	82	18	missense_variant	MODERATE	Lama2	PASS	snv	C>A	G:C>T:A	1	PASS
chr10	30648514	.	G	A	.	clustered_events	AS_FilterStatus=SITE;AS_SB_TABLE=44,117|2,3;DP=171;ECNT=13;GERMQ=93;MBQ=32,20;MFRL=145,96;MMQ=60,60;MPOS=13;NALOD=1.74;NLOD=16.25;POPAF=6.00;TLOD=8.15;ANN=A|synonymous_variant|LOW|Ncoa7|ENSMUSG00000039697|transcript|ENSMUST00000068567|protein_coding|14/16|c.2553C>T|p.Pro851Pro|2894/5105|2553/2832|851/943||	GT:AD:AF:DP:F1R2:F2R1:SB	0/0:71,0:0.018:71:26,0:45,0:19,52,0,0	0/1:90,5:0.043:95:32,2:55,2:25,65,2,3	RY1114T6	chr10_30648514_G>A	71	0	90	5	synonymous_variant	LOW	Ncoa7	PASS	snv	G>A	G:C>A:T	1	.
chr10	30648532	.	C	T	.	clustered_events;haplotype	AS_FilterStatus=SITE;AS_SB_TABLE=26,81|2,2;DP=116;ECNT=13;GERMQ=93;MBQ=36,20;MFRL=151,87;MMQ=60,60;MPOS=25;NALOD=1.56;NLOD=10.54;POPAF=6.00;TLOD=10.41;ANN=T|synonymous_variant|LOW|Ncoa7|ENSMUSG00000039697|transcript|ENSMUST00000068567|protein_coding|14/16|c.2535G>A|p.Gly845Gly|2876/5105|2535/2832|845/943||	GT:AD:AF:DP:F1R2:F2R1:PGT:PID:PS:SB	0|0:46,0:0.027:46:13,0:32,0:0|1:30648532_C_T:30648532:12,34,0,0	0|1:61,4:0.053:65:20,2:40,2:0|1:30648532_C_T:30648532:14,47,2,2	RY1114T6	chr10_30648532_C>T	46	0	61	4	synonymous_variant	LOW	Ncoa7	PASS	snv	C>T	G:C>A:T	1	.
chr10	30648538	.	T	A	.	clustered_events;haplotype	AS_FilterStatus=SITE;AS_SB_TABLE=22,76|1,2;DP=101;ECNT=13;GERMQ=93;MBQ=33,20;MFRL=152,77;MMQ=60,60;MPOS=34;NALOD=1.52;NLOD=9.63;POPAF=6.00;TLOD=10.50;ANN=A|splice_region_variant&synonymous_variant|LOW|Ncoa7|ENSMUSG00000039697|transcript|ENSMUST00000068567|protein_coding|14/16|c.2529A>T|p.Ile843Ile|2870/5105|2529/2832|843/943||	GT:AD:AF:DP:F1R2:F2R1:PGT:PID:PS:SB	0|0:42,0:0.029:42:13,0:28,0:0|1:30648532_C_T:30648532:10,32,0,0	0|1:56,3:0.057:59:17,2:34,1:0|1:30648532_C_T:30648532:12,44,1,2	RY1114T6	chr10_30648538_T>A	42	0	56	3	splice_region_variant&synonymous_variant	LOW	Ncoa7	PASS	snv	T>A	A:T>T:A	1	.
chr10	30648543	.	A	G	.	clustered_events;haplotype	AS_FilterStatus=SITE;AS_SB_TABLE=19,66|1,2;DP=88;ECNT=13;GERMQ=93;MBQ=33,20;MFRL=153,77;MMQ=60,60;MPOS=39;NALOD=1.43;NLOD=7.83;POPAF=6.00;TLOD=10.63;ANN=G|splice_region_variant&intron_variant|LOW|Ncoa7|ENSMUSG00000039697|transcript|ENSMUST00000068567|protein_coding|13/15|c.2527-3T>C||||||	GT:AD:AF:DP:F1R2:F2R1:PGT:PID:PS:SB	0|0:34,0:0.036:34:12,0:21,0:0|1:30648532_C_T:30648532:8,26,0,0	0|1:51,3:0.063:54:16,2:31,1:0|1:30648532_C_T:30648532:11,40,1,2	RY1114T6	chr10_30648543_A>G	34	0	51	3	splice_region_variant&intron_variant	LOW	Ncoa7	PASS	snv	A>G	A:T>G:C	1	.
chr10	30648545	.	T	C	.	clustered_events;haplotype	AS_FilterStatus=SITE;AS_SB_TABLE=17,64|1,2;DP=84;ECNT=13;GERMQ=93;MBQ=33,20;MFRL=153,77;MMQ=60,60;MPOS=38;NALOD=1.41;NLOD=7.53;POPAF=6.00;TLOD=10.66;ANN=C|splice_region_variant&intron_variant|LOW|Ncoa7|ENSMUSG00000039697|transcript|ENSMUST00000068567|protein_coding|13/15|c.2527-5A>G||||||	GT:AD:AF:DP:F1R2:F2R1:PGT:PID:PS:SB	0|0:33,0:0.037:33:10,0:20,0:0|1:30648532_C_T:30648532:8,25,0,0	0|1:48,3:0.064:51:16,2:30,1:0|1:30648532_C_T:30648532:9,39,1,2	RY1114T6	chr10_30648545_T>C	33	0	48	3	splice_region_variant&intron_variant	LOW	Ncoa7	PASS	snv	T>C	A:T>G:C	1	.
chr10	30648559	.	AGAC	A	.	clustered_events;haplotype;weak_evidence	AS_FilterStatus=weak_evidence;AS_SB_TABLE=12,47|0,2;DP=65;ECNT=13;GERMQ=93;MBQ=36,28;MFRL=159,87;MMQ=60,57;MPOS=47;NALOD=1.29;NLOD=5.42;POPAF=6.00;TLOD=4.69;ANN=A|intron_variant|MODIFIER|Ncoa7|ENSMUSG00000039697|transcript|ENSMUST00000068567|protein_coding|13/15|c.2527-22_2527-20delGTC||||||	GT:AD:AF:DP:F1R2:F2R1:PGT:PID:PS:SB	0|0:22,0:0.049:22:6,0:16,0:0|1:30648559_AGAC_A:30648559:4,18,0,0	0|1:37,2:0.083:39:12,1:25,1:0|1:30648559_AGAC_A:30648559:8,29,0,2	RY1114T6	chr10_30648559_AGAC>A	22	0	37	2	intron_variant	MODIFIER	Ncoa7	.	indel	.	.	1	.
chr10	30648564	.	TA	T	.	clustered_events;haplotype;weak_evidence	AS_FilterStatus=weak_evidence;AS_SB_TABLE=9,46|0,2;DP=57;ECNT=13;GERMQ=93;MBQ=34,37;MFRL=159,87;MMQ=60,57;MPOS=46;NALOD=1.28;NLOD=5.42;POPAF=6.00;TLOD=4.74;ANN=T|intron_variant|MODIFIER|Ncoa7|ENSMUSG00000039697|transcript|ENSMUST00000068567|protein_coding|13/15|c.2527-25delT||||||	GT:AD:AF:DP:F1R2:F2R1:PGT:PID:PS:SB	0|0:21,0:0.050:21:6,0:14,0:0|1:30648559_AGAC_A:30648559:3,18,0,0	0|1:34,2:0.086:36:10,1:23,1:0|1:30648559_AGAC_A:30648559:6,28,0,2	RY1114T6	chr10_30648564_TA>T	21	0	34	2	intron_variant	MODIFIER	Ncoa7	.	indel	.	.	1	.
chr10	30648569	.	A	AC	.	clustered_events;haplotype;weak_evidence	AS_FilterStatus=weak_evidence;AS_SB_TABLE=7,44|0,2;DP=53;ECNT=13;GERMQ=86;MBQ=34,36;MFRL=160,87;MMQ=60,57;MPOS=42;NALOD=1.26;NLOD=5.12;POPAF=6.00;RPA=1,2;RU=C;STR;STRQ=93;TLOD=4.83;ANN=AC|intron_variant|MODIFIER|Ncoa7|ENSMUSG00000039697|transcript|ENSMUST00000068567|protein_coding|13/15|c.2527-30dupG||||||	GT:AD:AF:DP:F1R2:F2R1:PGT:PID:PS:SB	0|0:19,0:0.053:19:6,0:11,0:0|1:30648559_AGAC_A:30648559:2,17,0,0	0|1:32,2:0.091:34:10,1:20,1:0|1:30648559_AGAC_A:30648559:5,27,0,2	RY1114T6	chr10_30648569_A>AC	19	0	32	2	intron_variant	MODIFIER	Ncoa7	.	indel	.	.	1	.
chr10	30648571	.	T	TACA	.	clustered_events;haplotype;weak_evidence	AS_FilterStatus=weak_evidence;AS_SB_TABLE=7,41|0,2;DP=50;ECNT=13;GERMQ=77;MBQ=35,35;MFRL=165,87;MMQ=60,57;MPOS=39;NALOD=1.20;NLOD=4.52;POPAF=6.00;TLOD=4.91;ANN=TACA|intron_variant|MODIFIER|Ncoa7|ENSMUSG00000039697|transcript|ENSMUST00000068567|protein_coding|13/15|c.2527-32_2527-31insTGT||||||	GT:AD:AF:DP:F1R2:F2R1:PGT:PID:PS:SB	0|0:17,0:0.059:17:6,0:10,0:0|1:30648559_AGAC_A:30648559:2,15,0,0	0|1:31,2:0.097:33:9,1:19,1:0|1:30648559_AGAC_A:30648559:5,26,0,2	RY1114T6	chr10_30648571_T>TACA	17	0	31	2	intron_variant	MODIFIER	Ncoa7	.	indel	.	.	1	.
chr10	30648578	.	AT	CC	.	clustered_events;haplotype	AS_FilterStatus=SITE;AS_SB_TABLE=4,36|0,2;DP=42;ECNT=13;GERMQ=91;MBQ=35,38;MFRL=169,87;MMQ=60,57;MPOS=29;NALOD=1.15;NLOD=3.91;POPAF=6.00;TLOD=5.11;ANN=CC|intron_variant|MODIFIER|Ncoa7|ENSMUSG00000039697|transcript|ENSMUST00000068567|protein_coding|13/15|c.2527-39_2527-38delATinsGG||||||	GT:AD:AF:DP:F1R2:F2R1:PGT:PID:PS:SB	0|0:14,0:0.067:14:5,0:7,0:0|1:30648559_AGAC_A:30648559:1,13,0,0	0|1:26,2:0.111:28:7,1:17,1:0|1:30648559_AGAC_A:30648559:3,23,0,2	RY1114T6	chr10_30648578_AT>CC	14	0	26	2	intron_variant	MODIFIER	Ncoa7	.	indel	.	.	1	.
chr10	30648584	.	CT	TC	.	clustered_events;haplotype	AS_FilterStatus=SITE;AS_SB_TABLE=1,28|0,2;DP=31;ECNT=13;GERMQ=63;MBQ=38,37;MFRL=172,87;MMQ=60,57;MPOS=23;NALOD=1.000;NLOD=2.71;POPAF=6.00;TLOD=5.33;ANN=TC|intron_variant|MODIFIER|Ncoa7|ENSMUSG00000039697|transcript|ENSMUST00000068567|protein_coding|13/15|c.2527-45_2527-44delAGinsGA||||||	GT:AD:AF:DP:F1R2:F2R1:PGT:PID:PS:SB	0|0:9,0:0.091:9:5,0:4,0:0|1:30648559_AGAC_A:30648559:0,9,0,0	0|1:20,2:0.130:22:6,1:13,1:0|1:30648559_AGAC_A:30648559:1,19,0,2	RY1114T6	chr10_30648584_CT>TC	9	0	20	2	intron_variant	MODIFIER	Ncoa7	.	indel	.	.	1	.
chr10	30648590	.	T	A	.	clustered_events;haplotype	AS_FilterStatus=SITE;AS_SB_TABLE=0,25|0,2;DP=27;ECNT=13;GERMQ=53;MBQ=35,36;MFRL=172,87;MMQ=60,57;MPOS=17;NALOD=1.000;NLOD=2.71;POPAF=6.00;TLOD=5.53;ANN=A|intron_variant|MODIFIER|Ncoa7|ENSMUSG00000039697|transcript|ENSMUST00000068567|protein_coding|13/15|c.2527-50A>T||||||	GT:AD:AF:DP:F1R2:F2R1:PGT:PID:PS:SB	0|0:9,0:0.091:9:4,0:4,0:0|1:30648559_AGAC_A:30648559:0,9,0,0	0|1:16,2:0.150:18:6,1:10,1:0|1:30648559_AGAC_A:30648559:0,16,0,2	RY1114T6	chr10_30648590_T>A	9	0	16	2	intron_variant	MODIFIER	Ncoa7	.	snv	T>A	A:T>T:A	1	.
chr10	30648592	.	G	GCA	.	clustered_events;haplotype;weak_evidence	AS_FilterStatus=weak_evidence;AS_SB_TABLE=0,24|0,2;DP=26;ECNT=13;GERMQ=17;MBQ=37,37;MFRL=174,87;MMQ=60,57;MPOS=15;NALOD=0.954;NLOD=2.41;POPAF=6.00;TLOD=5.53;ANN=GCA|intron_variant|MODIFIER|Ncoa7|ENSMUSG00000039697|transcript|ENSMUST00000068567|protein_coding|13/15|c.2527-53_2527-52insTG||||||	GT:AD:AF:DP:F1R2:F2R1:PGT:PID:PS:SB	0|0:8,0:0.100:8:4,0:4,0:0|1:30648559_AGAC_A:30648559:0,8,0,0	0|1:16,2:0.150:18:6,1:9,1:0|1:30648559_AGAC_A:30648559:0,16,0,2	RY1114T6	chr10_30648592_G>GCA	8	0	16	2	intron_variant	MODIFIER	Ncoa7	.	indel	.	.	1	.
chr10	31379220	rs36549729	T	C	.	clustered_events;haplotype;weak_evidence	AS_FilterStatus=weak_evidence;AS_SB_TABLE=85,52|1,1;ECNT=5;GERMQ=93;MBQ=25,38;MFRL=151,104;MMQ=60,60;MPOS=13;NALOD=1.77;NLOD=17.49;POPAF=6.00;TLOD=4.25;CSQ=C|ENSMUSG00000000296|ENSMUST00000000305|Transcript|missense_variant|321|130|44|I/V|Att/Gtt|||-1;DP=161;DP4=0,0,102,59;ANN=C|missense_variant|MODERATE|Tpd52l1|ENSMUSG00000000296|transcript|ENSMUST00000000305|protein_coding|2/7|c.130A>G|p.Ile44V…	GT:AD:AF:DP:F1R2:F2R1:PGT:PID:PS:SB	0|0:80,0:0.017:80:34,0:44,0:0|1:31379220_T_C:31379220:49,31,0,0	0|1:57,2:0.061:59:21,2:34,0:0|1:31379220_T_C:31379220:36,21,1,1	RY1114T6	chr10_31379220_T>C	80	0	57	2	missense_variant	MODERATE	Tpd52l1	.	snv	T>C	A:T>G:C	1	.
chr10	31379230	.	C	T	.	clustered_events;haplotype;weak_evidence	AS_FilterStatus=weak_evidence;AS_SB_TABLE=87,60|1,1;DP=149;ECNT=5;GERMQ=93;MBQ=33,37;MFRL=150,104;MMQ=60,60;MPOS=23;NALOD=1.51;NLOD=18.66;POPAF=6.00;TLOD=4.49;ANN=T|synonymous_variant|LOW|Tpd52l1|ENSMUSG00000000296|transcript|ENSMUST00000000305|protein_coding|2/7|c.120G>A|p.Lys40Lys|311/1267|120/615|40/204||	GT:AD:AF:DP:F1R2:F2R1:PGT:PID:PS:SB	0|0:86,0:0.016:86:36,0:47,0:0|1:31379220_T_C:31379220:50,36,0,0	0|1:61,2:0.058:63:24,2:31,0:0|1:31379220_T_C:31379220:37,24,1,1	RY1114T6	chr10_31379230_C>T	86	0	61	2	synonymous_variant	LOW	Tpd52l1	.	snv	C>T	G:C>A:T	1	.
chr10	31379235	.	G	A	.	clustered_events;haplotype;weak_evidence	AS_FilterStatus=weak_evidence;AS_SB_TABLE=92,58|1,1;DP=152;ECNT=5;GERMQ=93;MBQ=34,36;MFRL=151,104;MMQ=60,60;MPOS=28;NALOD=1.53;NLOD=19.57;POPAF=6.00;TLOD=4.44;ANN=A|synonymous_variant|LOW|Tpd52l1|ENSMUSG00000000296|transcript|ENSMUST00000000305|protein_coding|2/7|c.115C>T|p.Leu39Leu|306/1267|115/615|39/204||	GT:AD:AF:DP:F1R2:F2R1:PGT:PID:PS:SB	0|0:88,0:0.015:88:36,0:45,0:0|1:31379220_T_C:31379220:53,35,0,0	0|1:62,2:0.056:64:27,2:32,0:0|1:31379220_T_C:31379220:39,23,1,1	RY1114T6	chr10_31379235_G>A	88	0	62	2	synonymous_variant	LOW	Tpd52l1	.	snv	G>A	G:C>A:T	1	.
chr10	31379245	.	C	T	.	clustered_events;weak_evidence	AS_FilterStatus=weak_evidence;AS_SB_TABLE=88,59|1,1;DP=150;ECNT=5;GERMQ=93;MBQ=36,37;MFRL=155,104;MMQ=60,60;MPOS=38;NALOD=1.83;NLOD=19.77;POPAF=6.00;TLOD=4.08;ANN=T|synonymous_variant|LOW|Tpd52l1|ENSMUSG00000000296|transcript|ENSMUST00000000305|protein_coding|2/7|c.105G>A|p.Glu35Glu|296/1267|105/615|35/204||	GT:AD:AF:DP:F1R2:F2R1:SB	0/0:85,0:0.014:85:38,0:45,0:49,36,0,0	0/1:62,2:0.053:64:25,2:33,0:39,23,1,1	RY1114T6	chr10_31379245_C>T	85	0	62	2	synonymous_variant	LOW	Tpd52l1	.	snv	C>T	G:C>A:T	1	.
chr10	31379282	.	C	G	.	clustered_events;weak_evidence	AS_FilterStatus=weak_evidence;AS_SB_TABLE=101,87|1,2;DP=197;ECNT=5;GERMQ=93;MBQ=32,20;MFRL=149,112;MMQ=60,60;MPOS=15;NALOD=1.94;NLOD=25.89;POPAF=6.00;TLOD=4.04;ANN=G|missense_variant|MODERATE|Tpd52l1|ENSMUSG00000000296|transcript|ENSMUST00000000305|protein_coding|2/7|c.68G>C|p.Gly23Ala|259/1267|68/615|23/204||	GT:AD:AF:DP:F1R2:F2R1:SB	0/0:111,0:0.011:111:41,0:70,0:59,52,0,0	0/1:77,3:0.049:80:30,3:46,0:42,35,1,2	RY1114T6	chr10_31379282_C>G	111	0	77	3	missense_variant	MODERATE	Tpd52l1	PASS	snv	C>G	G:C>C:G	1	.
chr10	33435586	.	C	A	.	PASS	AS_FilterStatus=SITE;AS_SB_TABLE=71,41|2,4;DP=121;ECNT=1;GERMQ=93;MBQ=20,20;MFRL=150,129;MMQ=60,60;MPOS=27;NALOD=1.71;NLOD=15.05;POPAF=6.00;TLOD=12.01;ANN=A|intron_variant|MODIFIER|Trdn|ENSMUSG00000019787|transcript|ENSMUST00000095762|protein_coding|24/37|c.1480+1856C>A||||||	GT:AD:AF:DP:F1R2:F2R1:SB	0/0:74,0:0.019:74:36,0:37,0:47,27,0,0	0/1:38,6:0.156:44:25,5:13,1:24,14,2,4	RY1114T6	chr10_33435586_C>A	74	0	38	6	intron_variant	MODIFIER	Trdn	PASS	snv	C>A	G:C>T:A	1	PASS
chr10	34041602	.	C	A	.	weak_evidence	AS_FilterStatus=weak_evidence;AS_SB_TABLE=68,67|1,2;DP=145;ECNT=1;GERMQ=93;MBQ=20,20;MFRL=141,119;MMQ=60,60;MPOS=38;NALOD=1.70;NLOD=14.45;POPAF=6.00;TLOD=4.13;ANN=A|synonymous_variant|LOW|Fam26d|ENSMUSG00000039508|transcript|ENSMUST00000048052|protein_coding|2/2|c.852G>T|p.Val284Val|896/3714|852/948|284/315||,A|intron_variant|MODIFIER|Trappc3l|ENSMUSG00000071340|transcript|ENSMUST00000095758|prot…	GT:AD:AF:DP:F1R2:F2R1:SB	0/0:69,0:0.020:69:21,0:48,0:34,35,0,0	0/1:66,3:0.058:69:31,0:35,3:34,32,1,2	RY1114T6	chr10_34041602_C>A	69	0	66	3	synonymous_variant	LOW	Fam26d	PASS	snv	C>A	G:C>T:A	1	.
chr10	39105123	.	C	A	.	PASS	AS_FilterStatus=SITE;AS_SB_TABLE=200,94|5,3;DP=317;ECNT=1;GERMQ=93;MBQ=20,20;MFRL=145,127;MMQ=60,60;MPOS=35;NALOD=2.10;NLOD=37.02;POPAF=6.00;TLOD=13.46;ANN=A|intron_variant|MODIFIER|Lama4|ENSMUSG00000019846|transcript|ENSMUST00000019992|protein_coding|35/37|c.5092-14C>A||||||	GT:AD:AF:DP:F1R2:F2R1:SB	0/0:174,0:7.843e-03:174:62,0:112,0:114,60,0,0	0/1:120,8:0.060:128:25,4:95,4:86,34,5,3	RY1114T6	chr10_39105123_C>A	174	0	120	8	intron_variant	MODIFIER	Lama4	PASS	snv	C>A	G:C>T:A	1	PASS
chr10	39198558	.	T	G	.	clustered_events;haplotype;map_qual;normal_artifact	AS_FilterStatus=map_qual;AS_SB_TABLE=28,14|4,0;DP=46;ECNT=3;GERMQ=41;MBQ=33,37;MFRL=166,226;MMQ=40,25;MPOS=11;NALOD=-1.687e+00;NLOD=3.03;POPAF=6.00;TLOD=9.76;ANN=G|intergenic_region|MODIFIER|Wisp3-Fyn|ENSMUSG00000062074-ENSMUSG00000019843|intergenic_region|ENSMUSG00000062074-ENSMUSG00000019843|||n.39198558T>G||||||	GT:AD:AF:DP:F1R2:F2R1:PGT:PID:PS:SB	0|0:29,1:0.074:30:20,0:9,1:0|1:39198558_T_G:39198558:18,11,1,0	0|1:13,3:0.250:16:5,2:7,1:0|1:39198558_T_G:39198558:10,3,3,0	RY1114T6	chr10_39198558_T>G	29	1	13	3	intergenic_region	MODIFIER	Wisp3-Fyn	.	snv	T>G	A:T>C:G	2	.
chr10	39198560	.	C	T	.	clustered_events;haplotype;map_qual;normal_artifact	AS_FilterStatus=map_qual;AS_SB_TABLE=28,14|4,0;DP=46;ECNT=3;GERMQ=41;MBQ=35,36;MFRL=166,226;MMQ=40,25;MPOS=13;NALOD=-1.687e+00;NLOD=3.03;POPAF=6.00;TLOD=9.76;ANN=T|intergenic_region|MODIFIER|Wisp3-Fyn|ENSMUSG00000062074-ENSMUSG00000019843|intergenic_region|ENSMUSG00000062074-ENSMUSG00000019843|||n.39198560C>T||||||	GT:AD:AF:DP:F1R2:F2R1:PGT:PID:PS:SB	0|0:29,1:0.074:30:19,0:8,1:0|1:39198558_T_G:39198558:18,11,1,0	0|1:13,3:0.250:16:5,2:8,1:0|1:39198558_T_G:39198558:10,3,3,0	RY1114T6	chr10_39198560_C>T	29	1	13	3	intergenic_region	MODIFIER	Wisp3-Fyn	.	snv	C>T	G:C>A:T	2	.
chr10	39198594	.	G	A	.	clustered_events;map_qual;normal_artifact;strand_bias;weak_evidence	AS_FilterStatus=weak_evidence,map_qual,strand_bias;AS_SB_TABLE=44,23|5,0;DP=75;ECNT=3;GERMQ=84;MBQ=30,37;MFRL=162,218;MMQ=40,25;MPOS=37;NALOD=-1.627e+00;NLOD=4.58;POPAF=6.00;TLOD=4.12;ANN=A|intergenic_region|MODIFIER|Wisp3-Fyn|ENSMUSG00000062074-ENSMUSG00000019843|intergenic_region|ENSMUSG00000062074-ENSMUSG00000019843|||n.39198594G>A||||||	GT:AD:AF:DP:F1R2:F2R1:SB	0/0:43,2:0.080:45:32,1:11,1:26,17,2,0	0/1:24,3:0.153:27:13,2:11,1:18,6,3,0	RY1114T6	chr10_39198594_G>A	43	2	24	3	intergenic_region	MODIFIER	Wisp3-Fyn	.	snv	G>A	G:C>A:T	2	.
chr10	42196615	.	G	A	.	weak_evidence	AS_FilterStatus=weak_evidence;AS_SB_TABLE=92,78|2,1;DP=178;ECNT=2;GERMQ=93;MBQ=30,20;MFRL=157,122;MMQ=60,60;MPOS=4;NALOD=1.82;NLOD=19.26;POPAF=6.00;TLOD=3.88;ANN=A|synonymous_variant|LOW|Foxo3|ENSMUSG00000048756|transcript|ENSMUST00000056974|protein_coding|3/4|c.1905C>T|p.Asp635Asp|2230/2889|1905/2019|635/672||	GT:AD:AF:DP:F1R2:F2R1:SB	0/0:85,0:0.015:85:30,0:55,0:47,38,0,0	0/1:85,3:0.039:88:20,3:64,0:45,40,2,1	RY1114T6	chr10_42196615_G>A	85	0	85	3	synonymous_variant	LOW	Foxo3	PASS	snv	G>A	G:C>A:T	1	.
chr10	42196642	.	G	A	.	weak_evidence	AS_FilterStatus=weak_evidence;AS_SB_TABLE=91,94|2,1;DP=191;ECNT=2;GERMQ=93;MBQ=20,20;MFRL=153,122;MMQ=60,60;MPOS=31;NALOD=1.80;NLOD=18.66;POPAF=6.00;TLOD=3.63;ANN=A|synonymous_variant|LOW|Foxo3|ENSMUSG00000048756|transcript|ENSMUST00000056974|protein_coding|3/4|c.1878C>T|p.Ile626Ile|2203/2889|1878/2019|626/672||	GT:AD:AF:DP:F1R2:F2R1:SB	0/0:90,0:0.016:90:29,0:61,0:45,45,0,0	0/1:95,3:0.040:98:22,3:73,0:46,49,2,1	RY1114T6	chr10_42196642_G>A	90	0	95	3	synonymous_variant	LOW	Foxo3	PASS	snv	G>A	G:C>A:T	1	.
chr10	42196796	.	G	A	.	PASS	AS_FilterStatus=SITE;AS_SB_TABLE=40,25|2,2;DP=70;ECNT=2;GERMQ=93;MBQ=36,28;MFRL=157,154;MMQ=60,60;MPOS=9;NALOD=1.34;NLOD=6.32;POPAF=6.00;TLOD=5.75;ANN=A|missense_variant|MODERATE|Foxo3|ENSMUSG00000048756|transcript|ENSMUST00000056974|protein_coding|3/4|c.1724C>T|p.Ala575Val|2049/2889|1724/2019|575/672||	GT:AD:AF:DP:F1R2:F2R1:PGT:PID:PS:SB	0|0:26,0:0.043:26:8,0:16,0:0|1:42196796_G_A:42196796:18,8,0,0	0|1:39,4:0.107:43:15,3:22,1:0|1:42196796_G_A:42196796:22,17,2,2	RY1114T6	chr10_42196796_G>A	26	0	39	4	missense_variant	MODERATE	Foxo3	PASS	snv	G>A	G:C>A:T	1	PASS
chr10	42196798	.	G	A	.	PASS	AS_FilterStatus=SITE;AS_SB_TABLE=37,25|3,2;DP=71;ECNT=2;GERMQ=93;MBQ=30,20;MFRL=159,161;MMQ=60,60;MPOS=28;NALOD=1.36;NLOD=6.32;POPAF=6.00;TLOD=8.10;ANN=A|synonymous_variant|LOW|Foxo3|ENSMUSG00000048756|transcript|ENSMUST00000056974|protein_coding|3/4|c.1722C>T|p.Pro574Pro|2047/2889|1722/2019|574/672||	GT:AD:AF:DP:F1R2:F2R1:PGT:PID:PS:SB	0|0:26,0:0.042:26:8,0:18,0:0|1:42196796_G_A:42196796:18,8,0,0	0|1:36,5:0.123:41:13,2:22,1:0|1:42196796_G_A:42196796:19,17,3,2	RY1114T6	chr10_42196798_G>A	26	0	36	5	synonymous_variant	LOW	Foxo3	PASS	snv	G>A	G:C>A:T	1	PASS
chr10	43961444	.	C	A	.	PASS	AS_FilterStatus=SITE;AS_SB_TABLE=65,47|2,2;DP=117;ECNT=1;GERMQ=93;MBQ=20,20;MFRL=144,152;MMQ=60,60;MPOS=15;NALOD=1.60;NLOD=11.74;POPAF=6.00;TLOD=5.36;ANN=A|missense_variant|MODERATE|Aim1|ENSMUSG00000019866|transcript|ENSMUST00000020017|protein_coding|16/20|c.4526G>T|p.Arg1509Leu|5304/7416|4526/5076|1509/1691||	GT:AD:AF:DP:F1R2:F2R1:SB	0/0:60,0:0.024:60:29,0:31,0:32,28,0,0	0/1:52,4:0.075:56:23,0:29,4:33,19,2,2	RY1114T6	chr10_43961444_C>A	60	0	52	4	missense_variant	MODERATE	Aim1	PASS	snv	C>A	G:C>T:A	1	PASS
chr10	57499386	.	G	T	.	base_qual;haplotype;strand_bias;weak_evidence	AS_FilterStatus=weak_evidence,base_qual,strand_bias;AS_SB_TABLE=83,32|4,0;DP=120;ECNT=2;GERMQ=93;MBQ=34,15;MFRL=147,176;MMQ=60,60;MPOS=18;NALOD=1.59;NLOD=11.14;POPAF=6.00;TLOD=4.31;ANN=T|intron_variant|MODIFIER|Hsf2|ENSMUSG00000019878|transcript|ENSMUST00000079833|protein_coding|4/11|c.456-30G>T||||||	GT:AD:AF:DP:F1R2:F2R1:PGT:PID:PS:SB	0|0:48,0:0.025:48:19,0:25,0:0|1:57499386_G_T:57499386:34,14,0,0	0|1:67,4:0.061:71:22,0:40,2:0|1:57499386_G_T:57499386:49,18,4,0	RY1114T6	chr10_57499386_G>T	48	0	67	4	intron_variant	MODIFIER	Hsf2	PASS	snv	G>T	G:C>T:A	1	.
chr10	57499391	.	GG	TT	.	haplotype;strand_bias;weak_evidence	AS_FilterStatus=weak_evidence,strand_bias;AS_SB_TABLE=84,36|4,0;DP=127;ECNT=2;GERMQ=93;MBQ=20,28;MFRL=143,176;MMQ=60,60;MPOS=20;NALOD=1.62;NLOD=12.04;POPAF=6.00;TLOD=4.31;ANN=TT|intron_variant|MODIFIER|Hsf2|ENSMUSG00000019878|transcript|ENSMUST00000079833|protein_coding|4/11|c.456-25_456-24delGGinsTT||||||	GT:AD:AF:DP:F1R2:F2R1:PGT:PID:PS:SB	0|0:54,0:0.023:54:21,0:27,0:0|1:57499386_G_T:57499386:37,17,0,0	0|1:66,4:0.061:70:23,0:39,2:0|1:57499386_G_T:57499386:47,19,4,0	RY1114T6	chr10_57499391_GG>TT	54	0	66	4	intron_variant	MODIFIER	Hsf2	PASS	indel	.	.	1	.
chr10	57519790	.	C	T	.	strand_bias;weak_evidence	AS_FilterStatus=weak_evidence,strand_bias;AS_SB_TABLE=74,109|0,2;DP=190;ECNT=1;GERMQ=93;MBQ=20,36;MFRL=150,179;MMQ=60,60;MPOS=49;NALOD=1.87;NLOD=21.97;POPAF=6.00;TLOD=3.01;ANN=T|synonymous_variant|LOW|Serinc1|ENSMUSG00000019877|transcript|ENSMUST00000020027|protein_coding|7/9|c.903G>A|p.Arg301Arg|1038/2880|903/1362|301/453||	GT:AD:AF:DP:F1R2:F2R1:SB	0/0:106,0:0.013:106:38,0:67,0:43,63,0,0	0/1:77,2:0.048:79:27,1:50,1:31,46,0,2	RY1114T6	chr10_57519790_C>T	106	0	77	2	synonymous_variant	LOW	Serinc1	.	snv	C>T	G:C>A:T	1	.
chr10	58223282	.	A	G	.	clustered_events;haplotype;map_qual;normal_artifact	AS_FilterStatus=map_qual;AS_SB_TABLE=243,64|6,4;DP=317;ECNT=9;GERMQ=93;MBQ=34,37;MFRL=190,196;MMQ=24,24;MPOS=23;NALOD=-1.182e+00;NLOD=37.48;POPAF=6.00;TLOD=5.37;ANN=G|missense_variant|MODERATE|AW822073|ENSMUSG00000058537|transcript|ENSMUST00000174056|protein_coding|2/2|c.827T>C|p.Leu276Ser|1603/2586|827/1137|276/378||,G|downstream_gene_variant|MODIFIER|Gm10807|ENSMUSG00000057216|transcript|ENSMUS…	GT:AD:AF:DP:F1R2:F2R1:PGT:PID:PS:SB	0|0:145,4:0.019:149:76,1:62,2:0|1:58223282_A_G:58223282:115,30,3,1	0|1:162,6:0.023:168:50,2:101,3:0|1:58223282_A_G:58223282:128,34,3,3	RY1114T6	chr10_58223282_A>G	145	4	162	6	missense_variant	MODERATE	AW822073	.	snv	A>G	A:T>G:C	4	.
chr10	58223285	.	C	A	.	clustered_events;haplotype;map_qual;normal_artifact	AS_FilterStatus=map_qual;AS_SB_TABLE=254,66|6,4;DP=331;ECNT=9;GERMQ=93;MBQ=37,36;MFRL=189,196;MMQ=24,24;MPOS=25;NALOD=-1.138e+00;NLOD=38.98;POPAF=6.00;TLOD=5.29;ANN=A|missense_variant|MODERATE|AW822073|ENSMUSG00000058537|transcript|ENSMUST00000174056|protein_coding|2/2|c.824G>T|p.Ser275Ile|1600/2586|824/1137|275/378||,A|downstream_gene_variant|MODIFIER|Gm10807|ENSMUSG00000057216|transcript|ENSMUS…	GT:AD:AF:DP:F1R2:F2R1:PGT:PID:PS:SB	0|0:150,4:0.019:154:81,1:65,3:0|1:58223282_A_G:58223282:120,30,3,1	0|1:170,6:0.022:176:58,2:110,4:0|1:58223282_A_G:58223282:134,36,3,3	RY1114T6	chr10_58223285_C>A	150	4	170	6	missense_variant	MODERATE	AW822073	.	snv	C>A	G:C>T:A	4	.
chr10	58223357	.	TC	T	.	clustered_events;haplotype;map_qual;normal_artifact	AS_FilterStatus=map_qual;AS_SB_TABLE=379,424|14,18;DP=864;ECNT=9;GERMQ=93;MBQ=20,20;MFRL=157,168;MMQ=24,24;MPOS=23;NALOD=-4.593e+01;NLOD=17.21;POPAF=6.00;RPA=2,1;RU=C;STR;STRQ=93;TLOD=62.18;ANN=T|frameshift_variant|HIGH|AW822073|ENSMUSG00000058537|transcript|ENSMUST00000174056|protein_coding|2/2|c.751delG|p.Glu251fs|1527/2586|751/1137|251/378||,T|downstream_gene_variant|MODIFIER|Gm10807|ENSMUSG00…	GT:AD:AF:DP:F1R2:F2R1:PGT:PID:PS:SB	0|0:420,13:0.036:433:202,4:205,9:0|1:58223357_TC_T:58223357:203,217,6,7	0|1:383,19:0.049:402:132,7:242,12:0|1:58223357_TC_T:58223357:176,207,8,11	RY1114T6	chr10_58223357_TC>T	420	13	383	19	frameshift_variant	HIGH	AW822073	.	indel	.	.	4	.
chr10	58223365	.	G	T	.	clustered_events;haplotype;map_qual;normal_artifact	AS_FilterStatus=map_qual;AS_SB_TABLE=367,436|14,17;DP=834;ECNT=9;GERMQ=93;MBQ=20,20;MFRL=157,167;MMQ=24,24;MPOS=22;NALOD=-4.598e+01;NLOD=16.32;POPAF=6.00;TLOD=60.81;ANN=T|synonymous_variant|LOW|AW822073|ENSMUSG00000058537|transcript|ENSMUST00000174056|protein_coding|2/2|c.744C>A|p.Val248Val|1520/2586|744/1137|248/378||,T|downstream_gene_variant|MODIFIER|Gm10807|ENSMUSG00000057216|transcript|ENSMU…	GT:AD:AF:DP:F1R2:F2R1:PGT:PID:PS:SB	0|0:421,13:0.037:434:195,4:210,9:0|1:58223357_TC_T:58223357:200,221,6,7	0|1:382,18:0.046:400:131,6:235,10:0|1:58223357_TC_T:58223357:167,215,8,10	RY1114T6	chr10_58223365_G>T	421	13	382	18	synonymous_variant	LOW	AW822073	.	snv	G>T	G:C>T:A	4	.
chr10	58223370	.	C	T	.	clustered_events;map_qual;normal_artifact	AS_FilterStatus=map_qual;AS_SB_TABLE=340,442|14,16;DP=828;ECNT=9;GERMQ=93;MBQ=20,20;MFRL=157,145;MMQ=24,24;MPOS=34;NALOD=-1.334e+01;NLOD=51.77;POPAF=6.00;TLOD=27.22;ANN=T|missense_variant|MODERATE|AW822073|ENSMUSG00000058537|transcript|ENSMUST00000174056|protein_coding|2/2|c.739G>A|p.Glu247Lys|1515/2586|739/1137|247/378||,T|downstream_gene_variant|MODIFIER|Gm10807|ENSMUSG00000057216|transcript|EN…	GT:AD:AF:DP:F1R2:F2R1:SB	0/0:410,11:0.026:421:194,3:208,8:189,221,5,6	0/1:372,19:0.043:391:140,2:224,17:151,221,9,10	RY1114T6	chr10_58223370_C>T	410	11	372	19	missense_variant	MODERATE	AW822073	.	snv	C>T	G:C>A:T	4	.
chr10	58223372	.	T	C	.	clustered_events;haplotype;map_qual;normal_artifact	AS_FilterStatus=map_qual;AS_SB_TABLE=344,445|11,18;DP=818;ECNT=9;GERMQ=93;MBQ=20,20;MFRL=156,169;MMQ=24,24;MPOS=28;NALOD=-4.605e+01;NLOD=15.11;POPAF=6.00;TLOD=60.88;ANN=C|missense_variant|MODERATE|AW822073|ENSMUSG00000058537|transcript|ENSMUST00000174056|protein_coding|2/2|c.737A>G|p.Asp246Gly|1513/2586|737/1137|246/378||,C|downstream_gene_variant|MODIFIER|Gm10807|ENSMUSG00000057216|transcript|EN…	GT:AD:AF:DP:F1R2:F2R1:PGT:PID:PS:SB	0|0:412,13:0.037:425:193,4:205,8:0|1:58223357_TC_T:58223357:190,222,6,7	0|1:377,16:0.047:393:133,6:229,10:0|1:58223357_TC_T:58223357:154,223,5,11	RY1114T6	chr10_58223372_T>C	412	13	377	16	missense_variant	MODERATE	AW822073	.	snv	T>C	A:T>G:C	4	.
chr10	58223395	.	G	T	.	clustered_events;haplotype;map_qual;normal_artifact	AS_FilterStatus=map_qual;AS_SB_TABLE=213,458|3,18;DP=692;ECNT=9;GERMQ=93;MBQ=20,34;MFRL=152,167;MMQ=24,24;MPOS=39;NALOD=-4.300e+01;NLOD=19.61;POPAF=6.00;TLOD=57.82;ANN=T|synonymous_variant|LOW|AW822073|ENSMUSG00000058537|transcript|ENSMUST00000174056|protein_coding|2/2|c.714C>A|p.Leu238Leu|1490/2586|714/1137|238/378||,T|downstream_gene_variant|MODIFIER|Gm10807|ENSMUSG00000057216|transcript|ENSMUS…	GT:AD:AF:DP:F1R2:F2R1:PGT:PID:PS:SB	0|0:354,10:0.034:364:161,3:184,7:0|1:58223357_TC_T:58223357:118,236,2,8	0|1:317,11:0.044:328:117,4:193,7:0|1:58223357_TC_T:58223357:95,222,1,10	RY1114T6	chr10_58223395_G>T	354	10	317	11	synonymous_variant	LOW	AW822073	.	snv	G>T	G:C>T:A	4	.
chr10	58223446	.	CA	TG	.	clustered_events;haplotype;map_qual;strand_bias;weak_evidence	AS_FilterStatus=weak_evidence,map_qual,strand_bias;AS_SB_TABLE=54,223|0,7;DP=284;ECNT=9;GERMQ=93;MBQ=30,37;MFRL=167,186;MMQ=24,24;MPOS=12;NALOD=2.16;NLOD=42.44;POPAF=6.00;TLOD=3.15;ANN=TG|downstream_gene_variant|MODIFIER|Gm10807|ENSMUSG00000057216|transcript|ENSMUST00000071408|processed_pseudogene||n.*4410_*4411delTGinsCA|||||4411|,TG|intron_variant|MODIFIER|AW822073|ENSMUSG00000058537|transcript…	GT:AD:AF:DP:F1R2:F2R1:PGT:PID:PS:SB	0|0:159,2:6.952e-03:161:61,1:76,1:0|1:58223446_CA_TG:58223446:36,123,0,2	0|1:118,5:0.026:123:43,1:62,4:0|1:58223446_CA_TG:58223446:18,100,0,5	RY1114T6	chr10_58223446_CA>TG	159	2	118	5	downstream_gene_variant	MODIFIER	Gm10807	.	indel	.	.	2	.
chr10	58223457	.	GC	AT	.	clustered_events;haplotype;map_qual;strand_bias;weak_evidence	AS_FilterStatus=weak_evidence,map_qual,strand_bias;AS_SB_TABLE=49,147|0,4;DP=207;ECNT=9;GERMQ=93;MBQ=36,36;MFRL=175,171;MMQ=50,24;MPOS=7;NALOD=1.99;NLOD=28.90;POPAF=6.00;TLOD=3.65;ANN=AT|downstream_gene_variant|MODIFIER|Gm10807|ENSMUSG00000057216|transcript|ENSMUST00000071408|processed_pseudogene||n.*4399_*4400delGCinsAT|||||4400|,AT|intron_variant|MODIFIER|AW822073|ENSMUSG00000058537|transcript|…	GT:AD:AF:DP:F1R2:F2R1:PGT:PID:PS:SB	0|0:114,0:0.010:114:52,0:57,0:0|1:58223446_CA_TG:58223446:34,80,0,0	0|1:82,4:0.038:86:31,1:40,3:0|1:58223446_CA_TG:58223446:15,67,0,4	RY1114T6	chr10_58223457_GC>AT	114	0	82	4	downstream_gene_variant	MODIFIER	Gm10807	PASS	indel	.	.	2	.
chr10	58223757	.	C	T	.	clustered_events;haplotype;map_qual	AS_FilterStatus=map_qual;AS_SB_TABLE=34,22|2,1;DP=60;ECNT=9;GERMQ=93;MBQ=36,36;MFRL=158,288;MMQ=40,27;MPOS=16;NALOD=1.34;NLOD=6.32;POPAF=6.00;TLOD=8.46;ANN=T|downstream_gene_variant|MODIFIER|Gm10807|ENSMUSG00000057216|transcript|ENSMUST00000071408|processed_pseudogene||n.*4100G>A|||||4100|,T|intron_variant|MODIFIER|AW822073|ENSMUSG00000058537|transcript|ENSMUST00000174056|protein_coding|1/1|c.701…	GT:AD:AF:DP:F1R2:F2R1:PGT:PID:PS:SB	0|0:24,0:0.043:24:14,0:9,0:0|1:58223757_C_T:58223757:17,7,0,0	0|1:32,3:0.129:35:6,2:24,1:0|1:58223757_C_T:58223757:17,15,2,1	RY1114T6	chr10_58223757_C>T	24	0	32	3	downstream_gene_variant	MODIFIER	Gm10807	PASS	snv	C>T	G:C>A:T	2	.
chr10	58223769	.	T	C	.	clustered_events;haplotype;map_qual	AS_FilterStatus=map_qual;AS_SB_TABLE=39,27|2,1;DP=69;ECNT=9;GERMQ=93;MBQ=34,37;MFRL=157,288;MMQ=40,27;MPOS=28;NALOD=1.40;NLOD=7.22;POPAF=6.00;TLOD=8.29;ANN=C|downstream_gene_variant|MODIFIER|Gm10807|ENSMUSG00000057216|transcript|ENSMUST00000071408|processed_pseudogene||n.*4088A>G|||||4088|,C|intron_variant|MODIFIER|AW822073|ENSMUSG00000058537|transcript|ENSMUST00000174056|protein_coding|1/1|c.701…	GT:AD:AF:DP:F1R2:F2R1:PGT:PID:PS:SB	0|0:32,0:0.038:32:16,0:16,0:0|1:58223757_C_T:58223757:19,13,0,0	0|1:34,3:0.118:37:6,2:27,1:0|1:58223757_C_T:58223757:20,14,2,1	RY1114T6	chr10_58223769_T>C	32	0	34	3	downstream_gene_variant	MODIFIER	Gm10807	PASS	snv	T>C	A:T>G:C	2	.
chr10	58223798	.	A	C	.	clustered_events;haplotype;map_qual	AS_FilterStatus=map_qual;AS_SB_TABLE=48,35|2,1;DP=86;ECNT=9;GERMQ=93;MBQ=20,37;MFRL=149,288;MMQ=46,27;MPOS=43;NALOD=1.51;NLOD=9.33;POPAF=6.00;TLOD=8.40;ANN=C|downstream_gene_variant|MODIFIER|Gm10807|ENSMUSG00000057216|transcript|ENSMUST00000071408|processed_pseudogene||n.*4059T>G|||||4059|,C|intron_variant|MODIFIER|AW822073|ENSMUSG00000058537|transcript|ENSMUST00000174056|protein_coding|1/1|c.701…	GT:AD:AF:DP:F1R2:F2R1:PGT:PID:PS:SB	0|0:44,0:0.030:44:21,0:22,0:0|1:58223757_C_T:58223757:26,18,0,0	0|1:39,3:0.125:42:6,2:30,1:0|1:58223757_C_T:58223757:22,17,2,1	RY1114T6	chr10_58223798_A>C	44	0	39	3	downstream_gene_variant	MODIFIER	Gm10807	PASS	snv	A>C	A:T>C:G	2	.
chr10	58223919	.	C	T	.	clustered_events;normal_artifact	AS_FilterStatus=SITE;AS_SB_TABLE=819,129|23,7;DP=1010;ECNT=9;GERMQ=93;MBQ=36,34;MFRL=150,139;MMQ=40,40;MPOS=22;NALOD=-3.114e+01;NLOD=80.01;POPAF=6.00;TLOD=15.67;ANN=T|downstream_gene_variant|MODIFIER|Gm10807|ENSMUSG00000057216|transcript|ENSMUST00000071408|processed_pseudogene||n.*3938G>A|||||3938|,T|intron_variant|MODIFIER|AW822073|ENSMUSG00000058537|transcript|ENSMUST00000174056|protein_coding|…	GT:AD:AF:DP:F1R2:F2R1:SB	0/0:501,20:0.034:521:203,8:278,12:440,61,14,6	0/1:447,10:0.025:457:149,2:288,8:379,68,9,1	RY1114T6	chr10_58223919_C>T	501	20	447	10	downstream_gene_variant	MODIFIER	Gm10807	.	snv	C>T	G:C>A:T	3	.
chr10	58223920	.	G	T	.	clustered_events;haplotype;map_qual;normal_artifact;strand_bias	AS_FilterStatus=map_qual,strand_bias;AS_SB_TABLE=869,142|16,0;DP=1033;ECNT=9;GERMQ=93;MBQ=30,36;MFRL=149,148;MMQ=40,25;MPOS=17;NALOD=-1.887e+01;NLOD=106.85;POPAF=6.00;TLOD=13.39;ANN=T|downstream_gene_variant|MODIFIER|Gm10807|ENSMUSG00000057216|transcript|ENSMUST00000071408|processed_pseudogene||n.*3937C>A|||||3937|,T|intron_variant|MODIFIER|AW822073|ENSMUSG00000058537|transcript|ENSMUST0000017405…	GT:AD:AF:DP:F1R2:F2R1:PGT:PID:PS:SB	0|0:539,10:0.022:549:213,5:291,3:0|1:58223920_G_T:58223920:468,71,10,0	0|1:472,6:0.016:478:150,2:295,4:0|1:58223920_G_T:58223920:401,71,6,0	RY1114T6	chr10_58223920_G>T	539	10	472	6	downstream_gene_variant	MODIFIER	Gm10807	.	snv	G>T	G:C>T:A	2	.
chr10	58223934	.	C	T	.	clustered_events;haplotype;map_qual;normal_artifact;strand_bias	AS_FilterStatus=map_qual,strand_bias;AS_SB_TABLE=1149,265|21,1;DP=1480;ECNT=9;GERMQ=93;MBQ=36,34;MFRL=147,147;MMQ=40,25;MPOS=24;NALOD=-2.264e+01;NLOD=146.11;POPAF=6.00;TLOD=14.43;ANN=T|downstream_gene_variant|MODIFIER|Gm10807|ENSMUSG00000057216|transcript|ENSMUST00000071408|processed_pseudogene||n.*3923G>A|||||3923|,T|intron_variant|MODIFIER|AW822073|ENSMUSG00000058537|transcript|ENSMUST000001740…	GT:AD:AF:DP:F1R2:F2R1:PGT:PID:PS:SB	0|0:761,13:0.021:774:298,6:444,7:0|1:58223920_G_T:58223920:622,139,13,0	0|1:653,9:0.016:662:226,2:414,7:0|1:58223920_G_T:58223920:527,126,8,1	RY1114T6	chr10_58223934_C>T	761	13	653	9	downstream_gene_variant	MODIFIER	Gm10807	.	snv	C>T	G:C>A:T	2	.
chr10	58223958	.	C	T	.	clustered_events;haplotype;normal_artifact;strand_bias	AS_FilterStatus=strand_bias;AS_SB_TABLE=1640,686|20,2;DP=2348;ECNT=9;GERMQ=93;MBQ=20,36;MFRL=146,156;MMQ=47,42;MPOS=25;NALOD=-3.622e+01;NLOD=225.50;POPAF=6.00;TLOD=21.54;ANN=T|downstream_gene_variant|MODIFIER|Gm10807|ENSMUSG00000057216|transcript|ENSMUST00000071408|processed_pseudogene||n.*3899G>A|||||3899|,T|intron_variant|MODIFIER|AW822073|ENSMUSG00000058537|transcript|ENSMUST00000174056|protei…	GT:AD:AF:DP:F1R2:F2R1:PGT:PID:PS:SB	0|0:1275,12:0.012:1287:507,3:720,9:0|1:58223958_C_T:58223958:894,381,11,1	0|1:1051,10:0.012:1061:360,1:659,9:0|1:58223958_C_T:58223958:746,305,9,1	RY1114T6	chr10_58223958_C>T	1275	12	1051	10	downstream_gene_variant	MODIFIER	Gm10807	.	snv	C>T	G:C>A:T	3	.
chr10	58223969	.	G	T	.	clustered_events;haplotype;normal_artifact	AS_FilterStatus=SITE;AS_SB_TABLE=1803,874|22,5;DP=2704;ECNT=9;GERMQ=93;MBQ=20,34;MFRL=146,151;MMQ=47,43;MPOS=28;NALOD=-3.795e+01;NLOD=251.12;POPAF=6.00;TLOD=25.06;ANN=T|downstream_gene_variant|MODIFIER|Gm10807|ENSMUSG00000057216|transcript|ENSMUST00000071408|processed_pseudogene||n.*3888C>A|||||3888|,T|intron_variant|MODIFIER|AW822073|ENSMUSG00000058537|transcript|ENSMUST00000174056|protein_codin…	GT:AD:AF:DP:F1R2:F2R1:PGT:PID:PS:SB	0|0:1465,15:0.012:1480:575,4:837,10:0|1:58223958_C_T:58223958:975,490,11,4	0|1:1212,12:0.013:1224:407,1:757,9:0|1:58223958_C_T:58223958:828,384,11,1	RY1114T6	chr10_58223969_G>T	1465	15	1212	12	downstream_gene_variant	MODIFIER	Gm10807	.	snv	G>T	G:C>T:A	3	.
chr10	58223978	.	C	G	.	clustered_events;haplotype;normal_artifact	AS_FilterStatus=SITE;AS_SB_TABLE=1862,1021|24,6;DP=2944;ECNT=9;GERMQ=93;MBQ=20,36;MFRL=145,145;MMQ=47,45;MPOS=26;NALOD=-3.981e+01;NLOD=263.59;POPAF=6.00;TLOD=26.12;ANN=G|downstream_gene_variant|MODIFIER|Gm10807|ENSMUSG00000057216|transcript|ENSMUST00000071408|processed_pseudogene||n.*3879G>C|||||3879|,G|intron_variant|MODIFIER|AW822073|ENSMUSG00000058537|transcript|ENSMUST00000174056|protein_codi…	GT:AD:AF:DP:F1R2:F2R1:PGT:PID:PS:SB	0|0:1565,17:0.012:1582:617,4:910,13:0|1:58223958_C_T:58223958:1002,563,12,5	0|1:1318,13:0.014:1331:440,3:842,10:0|1:58223958_C_T:58223958:860,458,12,1	RY1114T6	chr10_58223978_C>G	1565	17	1318	13	downstream_gene_variant	MODIFIER	Gm10807	.	snv	C>G	G:C>C:G	3	.
chr10	58224089	.	G	A	.	clustered_events;normal_artifact;weak_evidence	AS_FilterStatus=weak_evidence;AS_SB_TABLE=584,1339|1,7;DP=1975;ECNT=6;GERMQ=93;MBQ=35,35;MFRL=147,138;MMQ=45,55;MPOS=9;NALOD=-1.023e+00;NLOD=228.62;POPAF=6.00;TLOD=3.98;ANN=A|downstream_gene_variant|MODIFIER|Gm10807|ENSMUSG00000057216|transcript|ENSMUST00000071408|processed_pseudogene||n.*3768C>T|||||3768|,A|intron_variant|MODIFIER|AW822073|ENSMUSG00000058537|transcript|ENSMUST00000174056|protein…	GT:AD:AF:DP:F1R2:F2R1:SB	0/0:1031,3:4.878e-03:1034:429,0:584,3:316,715,0,3	0/1:892,5:6.840e-03:897:321,3:553,2:268,624,1,4	RY1114T6	chr10_58224089_G>A	1031	3	892	5	downstream_gene_variant	MODIFIER	Gm10807	.	snv	G>A	G:C>A:T	2	.
chr10	58224104	.	C	A	.	clustered_events;haplotype;map_qual;normal_artifact	AS_FilterStatus=map_qual;AS_SB_TABLE=398,1125|4,12;DP=1604;ECNT=6;GERMQ=93;MBQ=36,28;MFRL=148,150;MMQ=46,27;MPOS=17;NALOD=-2.123e+01;NLOD=151.92;POPAF=6.00;TLOD=13.00;ANN=A|downstream_gene_variant|MODIFIER|Gm10807|ENSMUSG00000057216|transcript|ENSMUST00000071408|processed_pseudogene||n.*3753G>T|||||3753|,A|intron_variant|MODIFIER|AW822073|ENSMUSG00000058537|transcript|ENSMUST00000174056|protein_c…	GT:AD:AF:DP:F1R2:F2R1:PGT:PID:PS:SB	0|0:787,9:0.010:796:325,4:449,5:0|1:58224104_C_A:58224104:204,583,4,5	0|1:736,7:0.013:743:256,4:464,3:0|1:58224104_C_A:58224104:194,542,0,7	RY1114T6	chr10_58224104_C>A	787	9	736	7	downstream_gene_variant	MODIFIER	Gm10807	.	snv	C>A	G:C>T:A	4	.
chr10	58224110	.	C	A	.	clustered_events;haplotype;map_qual;normal_artifact	AS_FilterStatus=map_qual;AS_SB_TABLE=361,1068|4,13;DP=1446;ECNT=6;GERMQ=93;MBQ=36,31;MFRL=148,150;MMQ=45,27;MPOS=21;NALOD=-2.300e+01;NLOD=134.61;POPAF=6.00;TLOD=13.22;ANN=A|downstream_gene_variant|MODIFIER|Gm10807|ENSMUSG00000057216|transcript|ENSMUST00000071408|processed_pseudogene||n.*3747G>T|||||3747|,A|intron_variant|MODIFIER|AW822073|ENSMUSG00000058537|transcript|ENSMUST00000174056|protein_c…	GT:AD:AF:DP:F1R2:F2R1:PGT:PID:PS:SB	0|0:729,10:0.013:739:302,5:396,5:0|1:58224104_C_A:58224104:184,545,4,6	0|1:700,7:0.014:707:233,4:441,3:0|1:58224104_C_A:58224104:177,523,0,7	RY1114T6	chr10_58224110_C>A	729	10	700	7	downstream_gene_variant	MODIFIER	Gm10807	.	snv	C>A	G:C>T:A	4	.
chr10	58224116	.	T	C	.	clustered_events;haplotype;map_qual;normal_artifact	AS_FilterStatus=map_qual;AS_SB_TABLE=319,968|4,13;DP=1306;ECNT=6;GERMQ=93;MBQ=35,31;MFRL=149,150;MMQ=40,27;MPOS=26;NALOD=-2.340e+01;NLOD=114.74;POPAF=6.00;TLOD=13.53;ANN=C|downstream_gene_variant|MODIFIER|Gm10807|ENSMUSG00000057216|transcript|ENSMUST00000071408|processed_pseudogene||n.*3741A>G|||||3741|,C|intron_variant|MODIFIER|AW822073|ENSMUSG00000058537|transcript|ENSMUST00000174056|protein_co…	GT:AD:AF:DP:F1R2:F2R1:PGT:PID:PS:SB	0|0:649,10:0.015:659:257,5:347,5:0|1:58224104_C_A:58224104:165,484,4,6	0|1:638,7:0.015:645:213,4:396,3:0|1:58224104_C_A:58224104:154,484,0,7	RY1114T6	chr10_58224116_T>C	649	10	638	7	downstream_gene_variant	MODIFIER	Gm10807	.	snv	T>C	A:T>G:C	1	.
chr10	58224129	.	G	A	.	clustered_events;normal_artifact	AS_FilterStatus=SITE;AS_SB_TABLE=216,733|7,16;DP=997;ECNT=6;GERMQ=93;MBQ=35,35;MFRL=150,163;MMQ=40,60;MPOS=34;NALOD=-1.676e+01;NLOD=74.21;POPAF=6.00;TLOD=16.95;ANN=A|downstream_gene_variant|MODIFIER|Gm10807|ENSMUSG00000057216|transcript|ENSMUST00000071408|processed_pseudogene||n.*3728C>T|||||3728|,A|intron_variant|MODIFIER|AW822073|ENSMUSG00000058537|transcript|ENSMUST00000174056|protein_coding|1…	GT:AD:AF:DP:F1R2:F2R1:SB	0/0:453,12:0.027:465:196,9:250,3:106,347,4,8	0/1:496,11:0.027:507:172,5:318,6:110,386,3,8	RY1114T6	chr10_58224129_G>A	453	12	496	11	downstream_gene_variant	MODIFIER	Gm10807	.	snv	G>A	G:C>A:T	4	.
chr10	58224130	.	C	A	.	clustered_events;normal_artifact	AS_FilterStatus=SITE;AS_SB_TABLE=215,717|3,17;DP=988;ECNT=6;GERMQ=93;MBQ=37,36;MFRL=150,161;MMQ=40,40;MPOS=27;NALOD=-7.282e+00;NLOD=87.78;POPAF=6.00;TLOD=24.43;ANN=A|downstream_gene_variant|MODIFIER|Gm10807|ENSMUSG00000057216|transcript|ENSMUST00000071408|processed_pseudogene||n.*3727G>T|||||3727|,A|intron_variant|MODIFIER|AW822073|ENSMUSG00000058537|transcript|ENSMUST00000174056|protein_coding|1…	GT:AD:AF:DP:F1R2:F2R1:SB	0/0:449,6:0.016:455:200,1:240,5:107,342,1,5	0/1:483,14:0.032:497:170,5:306,9:108,375,2,12	RY1114T6	chr10_58224130_C>A	449	6	483	14	downstream_gene_variant	MODIFIER	Gm10807	.	snv	C>A	G:C>T:A	4	.
chr10	58224349	.	G	C	.	clustered_events;normal_artifact	AS_FilterStatus=SITE;AS_SB_TABLE=407,132|26,5;DP=593;ECNT=13;GERMQ=93;MBQ=36,36;MFRL=154,149;MMQ=27,43;MPOS=14;NALOD=-2.482e+01;NLOD=27.28;POPAF=6.00;TLOD=16.50;ANN=C|synonymous_variant|LOW|AW822073|ENSMUSG00000058537|transcript|ENSMUST00000174056|protein_coding|1/2|c.582C>G|p.Gly194Gly|1358/2586|582/1137|194/378||,C|downstream_gene_variant|MODIFIER|Gm10807|ENSMUSG00000057216|transcript|ENSMUST00…	GT:AD:AF:DP:F1R2:F2R1:SB	0/0:300,18:0.052:318:150,9:147,9:228,72,15,3	0/1:239,13:0.046:252:113,5:124,8:179,60,11,2	RY1114T6	chr10_58224349_G>C	300	18	239	13	synonymous_variant	LOW	AW822073	.	snv	G>C	G:C>C:G	3	.
chr10	58224352	.	C	G	.	clustered_events;normal_artifact	AS_FilterStatus=SITE;AS_SB_TABLE=438,145|12,2;DP=630;ECNT=13;GERMQ=93;MBQ=32,30;MFRL=153,157;MMQ=27,30;MPOS=18;NALOD=-7.224e+00;NLOD=54.90;POPAF=6.00;TLOD=8.01;ANN=G|synonymous_variant|LOW|AW822073|ENSMUSG00000058537|transcript|ENSMUST00000174056|protein_coding|1/2|c.579G>C|p.Thr193Thr|1355/2586|579/1137|193/378||,G|downstream_gene_variant|MODIFIER|Gm10807|ENSMUSG00000057216|transcript|ENSMUST000…	GT:AD:AF:DP:F1R2:F2R1:SB	0/0:324,7:0.030:331:157,5:166,2:246,78,7,0	0/1:259,7:0.029:266:121,4:136,3:192,67,5,2	RY1114T6	chr10_58224352_C>G	324	7	259	7	synonymous_variant	LOW	AW822073	.	snv	C>G	G:C>C:G	4	.
chr10	58224359	.	C	T	.	clustered_events;map_qual;normal_artifact	AS_FilterStatus=map_qual;AS_SB_TABLE=481,171|15,4;DP=685;ECNT=13;GERMQ=93;MBQ=30,34;MFRL=152,159;MMQ=27,27;MPOS=23;NALOD=-1.781e+01;NLOD=47.62;POPAF=6.00;TLOD=6.15;ANN=T|missense_variant|MODERATE|AW822073|ENSMUSG00000058537|transcript|ENSMUST00000174056|protein_coding|1/2|c.572G>A|p.Gly191Glu|1348/2586|572/1137|191/378||,T|downstream_gene_variant|MODIFIER|Gm10807|ENSMUSG00000057216|transcript|ENS…	GT:AD:AF:DP:F1R2:F2R1:SB	0/0:361,13:0.038:374:178,4:181,9:269,92,10,3	0/1:291,6:0.026:297:135,4:153,2:212,79,5,1	RY1114T6	chr10_58224359_C>T	361	13	291	6	missense_variant	MODERATE	AW822073	.	snv	C>T	G:C>A:T	4	.
chr10	58224364	.	T	A	.	clustered_events;haplotype;map_qual;normal_artifact	AS_FilterStatus=map_qual;AS_SB_TABLE=515,200|14,4;DP=733;ECNT=13;GERMQ=93;MBQ=20,33;MFRL=151,154;MMQ=27,27;MPOS=25;NALOD=-3.906e+01;NLOD=33.81;POPAF=6.00;TLOD=11.85;ANN=A|missense_variant|MODERATE|AW822073|ENSMUSG00000058537|transcript|ENSMUST00000174056|protein_coding|1/2|c.567A>T|p.Glu189Asp|1343/2586|567/1137|189/378||,A|downstream_gene_variant|MODIFIER|Gm10807|ENSMUSG00000057216|transcript|EN…	GT:AD:AF:DP:F1R2:F2R1:PGT:PID:PS:SB	0|0:403,12:0.032:415:195,7:189,5:0|1:58224364_T_A:58224364:290,113,9,3	0|1:312,6:0.022:318:140,5:166,1:0|1:58224364_T_A:58224364:225,87,5,1	RY1114T6	chr10_58224364_T>A	403	12	312	6	missense_variant	MODERATE	AW822073	.	snv	T>A	A:T>T:A	4	.
chr10	58224376	.	C	A	.	clustered_events;haplotype;map_qual;normal_artifact	AS_FilterStatus=map_qual;AS_SB_TABLE=553,287|17,6;DP=863;ECNT=13;GERMQ=93;MBQ=20,33;MFRL=146,151;MMQ=27,27;MPOS=23;NALOD=-4.140e+01;NLOD=38.72;POPAF=6.00;TLOD=11.58;ANN=A|missense_variant|MODERATE|AW822073|ENSMUSG00000058537|transcript|ENSMUST00000174056|protein_coding|1/2|c.555G>T|p.Leu185Phe|1331/2586|555/1137|185/378||,A|downstream_gene_variant|MODIFIER|Gm10807|ENSMUSG00000057216|transcript|EN…	GT:AD:AF:DP:F1R2:F2R1:PGT:PID:PS:SB	0|0:473,17:0.033:490:227,8:226,8:0|1:58224364_T_A:58224364:308,165,12,5	0|1:367,6:0.020:373:159,5:189,1:0|1:58224364_T_A:58224364:245,122,5,1	RY1114T6	chr10_58224376_C>A	473	17	367	6	missense_variant	MODERATE	AW822073	.	snv	C>A	G:C>T:A	4	.
chr10	58224385	.	C	A	.	clustered_events;haplotype;normal_artifact	AS_FilterStatus=SITE;AS_SB_TABLE=549,334|10,5;DP=908;ECNT=13;GERMQ=93;MBQ=20,33;MFRL=143,145;MMQ=27,48;MPOS=27;NALOD=-1.175e+01;NLOD=81.57;POPAF=6.00;TLOD=11.72;ANN=A|missense_variant|MODERATE|AW822073|ENSMUSG00000058537|transcript|ENSMUST00000174056|protein_coding|1/2|c.546G>T|p.Glu182Asp|1322/2586|546/1137|182/378||,A|downstream_gene_variant|MODIFIER|Gm10807|ENSMUSG00000057216|transcript|ENSMUS…	GT:AD:AF:DP:F1R2:F2R1:PGT:PID:PS:SB	0|0:497,8:0.017:505:253,1:231,7:0|1:58224385_C_A:58224385:306,191,5,3	0|1:386,7:0.021:393:172,5:204,2:0|1:58224385_C_A:58224385:243,143,5,2	RY1114T6	chr10_58224385_C>A	497	8	386	7	missense_variant	MODERATE	AW822073	.	snv	C>A	G:C>T:A	4	.
chr10	58224401	.	C	A	.	clustered_events;haplotype;normal_artifact	AS_FilterStatus=SITE;AS_SB_TABLE=531,487|10,5;DP=1058;ECNT=13;GERMQ=93;MBQ=20,20;MFRL=143,145;MMQ=39,48;MPOS=26;NALOD=-1.156e+01;NLOD=89.05;POPAF=6.00;TLOD=11.54;ANN=A|missense_variant|MODERATE|AW822073|ENSMUSG00000058537|transcript|ENSMUST00000174056|protein_coding|1/2|c.530G>T|p.Arg177Leu|1306/2586|530/1137|177/378||,A|downstream_gene_variant|MODIFIER|Gm10807|ENSMUSG00000057216|transcript|ENSMU…	GT:AD:AF:DP:F1R2:F2R1:PGT:PID:PS:SB	0|0:573,8:0.016:581:298,1:261,7:0|1:58224385_C_A:58224385:296,277,5,3	0|1:445,7:0.019:452:196,5:242,2:0|1:58224385_C_A:58224385:235,210,5,2	RY1114T6	chr10_58224401_C>A	573	8	445	7	missense_variant	MODERATE	AW822073	.	snv	C>A	G:C>T:A	4	.
chr10	58224425	.	G	T	.	clustered_events;normal_artifact	AS_FilterStatus=SITE;AS_SB_TABLE=426,602|24,25;DP=1093;ECNT=13;GERMQ=93;MBQ=20,20;MFRL=143,138;MMQ=33,44;MPOS=29;NALOD=-8.033e+01;NLOD=5.58;POPAF=6.00;TLOD=54.97;ANN=T|missense_variant|MODERATE|AW822073|ENSMUSG00000058537|transcript|ENSMUST00000174056|protein_coding|1/2|c.506C>A|p.Pro169His|1282/2586|506/1137|169/378||,T|downstream_gene_variant|MODIFIER|Gm10807|ENSMUSG00000057216|transcript|ENSMU…	GT:AD:AF:DP:F1R2:F2R1:SB	0/0:581,29:0.041:610:299,21:275,8:245,336,14,15	0/1:447,20:0.040:467:197,9:248,11:181,266,10,10	RY1114T6	chr10_58224425_G>T	581	29	447	20	missense_variant	MODERATE	AW822073	.	snv	G>T	G:C>T:A	3	.
chr10	58224448	.	C	T	.	clustered_events;normal_artifact	AS_FilterStatus=SITE;AS_SB_TABLE=273,518|7,10;DP=826;ECNT=13;GERMQ=93;MBQ=20,20;MFRL=141,131;MMQ=33,49;MPOS=25;NALOD=-2.510e+00;NLOD=85.39;POPAF=6.00;TLOD=16.46;ANN=T|synonymous_variant|LOW|AW822073|ENSMUSG00000058537|transcript|ENSMUST00000174056|protein_coding|1/2|c.483G>A|p.Ala161Ala|1259/2586|483/1137|161/378||,T|downstream_gene_variant|MODIFIER|Gm10807|ENSMUSG00000057216|transcript|ENSMUST00…	GT:AD:AF:DP:F1R2:F2R1:SB	0/0:451,4:0.014:455:235,3:212,1:156,295,1,3	0/1:340,13:0.042:353:145,5:192,7:117,223,6,7	RY1114T6	chr10_58224448_C>T	451	4	340	13	synonymous_variant	LOW	AW822073	.	snv	C>T	G:C>A:T	1	.
chr10	58224449	.	G	A	.	clustered_events;map_qual;normal_artifact	AS_FilterStatus=map_qual;AS_SB_TABLE=259,496|18,26;DP=813;ECNT=13;GERMQ=93;MBQ=20,20;MFRL=141,138;MMQ=39,27;MPOS=35;NALOD=-3.536e+01;NLOD=29.01;POPAF=6.00;TLOD=22.30;ANN=A|missense_variant|MODERATE|AW822073|ENSMUSG00000058537|transcript|ENSMUST00000174056|protein_coding|1/2|c.482C>T|p.Ala161Val|1258/2586|482/1137|161/378||,A|downstream_gene_variant|MODIFIER|Gm10807|ENSMUSG00000057216|transcript|E…	GT:AD:AF:DP:F1R2:F2R1:SB	0/0:423,27:0.061:450:226,13:194,14:144,279,11,16	0/1:332,17:0.046:349:143,8:184,9:115,217,7,10	RY1114T6	chr10_58224449_G>A	423	27	332	17	missense_variant	MODERATE	AW822073	.	snv	G>A	G:C>A:T	4	.
chr10	58224494	.	C	G	.	clustered_events;haplotype;normal_artifact;strand_bias	AS_FilterStatus=strand_bias;AS_SB_TABLE=42,167|0,47;DP=334;ECNT=13;GERMQ=93;MBQ=30,30;MFRL=150,151;MMQ=27,39;MPOS=6;NALOD=-7.905e+00;NLOD=11.25;POPAF=6.00;TLOD=11.89;ANN=G|missense_variant|MODERATE|AW822073|ENSMUSG00000058537|transcript|ENSMUST00000174056|protein_coding|1/2|c.437G>C|p.Arg146Pro|1213/2586|437/1137|146/378||,G|downstream_gene_variant|MODIFIER|Gm10807|ENSMUSG00000057216|transcript|E…	GT:AD:AF:DP:F1R2:F2R1:PGT:PID:PS:SB	0|0:106,24:0.061:130:55,12:49,12:0|1:58224494_C_G:58224494:19,87,0,24	0|1:103,23:0.071:126:35,12:64,11:0|1:58224494_C_G:58224494:23,80,0,23	RY1114T6	chr10_58224494_C>G	106	24	103	23	missense_variant	MODERATE	AW822073	.	snv	C>G	G:C>C:G	1	.
chr10	58224498	.	A	G	.	clustered_events;haplotype;normal_artifact;strand_bias	AS_FilterStatus=strand_bias;AS_SB_TABLE=42,137|0,44;DP=273;ECNT=13;GERMQ=93;MBQ=36,34;MFRL=153,149;MMQ=27,39;MPOS=2;NALOD=-6.279e+00;NLOD=9.49;POPAF=6.00;TLOD=12.54;ANN=G|missense_variant|MODERATE|AW822073|ENSMUSG00000058537|transcript|ENSMUST00000174056|protein_coding|1/2|c.433T>C|p.Trp145Arg|1209/2586|433/1137|145/378||,G|downstream_gene_variant|MODIFIER|Gm10807|ENSMUSG00000057216|transcript|EN…	GT:AD:AF:DP:F1R2:F2R1:PGT:PID:PS:SB	0|0:91,23:0.061:114:37,10:31,11:0|1:58224494_C_G:58224494:20,71,0,23	0|1:88,21:0.088:109:25,11:40,10:0|1:58224494_C_G:58224494:22,66,0,21	RY1114T6	chr10_58224498_A>G	91	23	88	21	missense_variant	MODERATE	AW822073	.	snv	A>G	A:T>G:C	1	.
chr10	58224509	.	C	T	.	clustered_events;map_qual;normal_artifact;weak_evidence	AS_FilterStatus=weak_evidence,map_qual;AS_SB_TABLE=44,116|2,7;DP=197;ECNT=13;GERMQ=93;MBQ=31,35;MFRL=160,168;MMQ=27,27;MPOS=3;NALOD=-5.665e+00;NLOD=12.86;POPAF=6.00;TLOD=3.99;ANN=T|missense_variant|MODERATE|AW822073|ENSMUSG00000058537|transcript|ENSMUST00000174056|protein_coding|1/2|c.422G>A|p.Arg141Gln|1198/2586|422/1137|141/378||,T|downstream_gene_variant|MODIFIER|Gm10807|ENSMUSG00000057216|tra…	GT:AD:AF:DP:F1R2:F2R1:SB	0/0:90,4:0.054:94:45,2:44,2:27,63,2,2	0/1:70,5:0.048:75:26,1:43,0:17,53,0,5	RY1114T6	chr10_58224509_C>T	90	4	70	5	missense_variant	MODERATE	AW822073	.	snv	C>T	G:C>A:T	2	.
chr10	58224595	.	G	A	.	clustered_events;map_qual;normal_artifact	AS_FilterStatus=map_qual;AS_SB_TABLE=440,144|14,4;DP=624;ECNT=7;GERMQ=93;MBQ=36,34;MFRL=161,172;MMQ=27,27;MPOS=15;NALOD=-1.805e+01;NLOD=45.92;POPAF=6.00;TLOD=6.77;ANN=A|synonymous_variant|LOW|AW822073|ENSMUSG00000058537|transcript|ENSMUST00000174056|protein_coding|1/2|c.336C>T|p.Asn112Asn|1112/2586|336/1137|112/378||,A|downstream_gene_variant|MODIFIER|Gm10807|ENSMUSG00000057216|transcript|ENSMUST…	GT:AD:AF:DP:F1R2:F2R1:SB	0/0:338,12:0.039:350:149,6:188,6:252,86,9,3	0/1:246,6:0.028:252:106,3:140,3:188,58,5,1	RY1114T6	chr10_58224595_G>A	338	12	246	6	synonymous_variant	LOW	AW822073	.	snv	G>A	G:C>A:T	4	.
chr10	58224627	.	G	A	.	clustered_events;haplotype;map_qual;normal_artifact	AS_FilterStatus=map_qual;AS_SB_TABLE=541,336|11,9;DP=900;ECNT=7;GERMQ=93;MBQ=20,20;MFRL=154,149;MMQ=27,27;MPOS=26;NALOD=-3.296e+01;NLOD=53.10;POPAF=6.00;TLOD=23.22;ANN=A|missense_variant|MODERATE|AW822073|ENSMUSG00000058537|transcript|ENSMUST00000174056|protein_coding|1/2|c.304C>T|p.Arg102Cys|1080/2586|304/1137|102/378||,A|downstream_gene_variant|MODIFIER|Gm10807|ENSMUSG00000057216|transcript|ENS…	GT:AD:AF:DP:F1R2:F2R1:PGT:PID:PS:SB	0|0:479,12:0.023:491:200,6:265,5:0|1:58224627_G_A:58224627:289,190,6,6	0|1:398,8:0.020:406:175,5:205,3:0|1:58224627_G_A:58224627:252,146,5,3	RY1114T6	chr10_58224627_G>A	479	12	398	8	missense_variant	MODERATE	AW822073	.	snv	G>A	G:C>A:T	4	.
chr10	58224634	.	C	T	.	clustered_events;haplotype;map_qual;normal_artifact	AS_FilterStatus=map_qual;AS_SB_TABLE=533,379|11,10;DP=975;ECNT=7;GERMQ=93;MBQ=20,20;MFRL=153,149;MMQ=27,27;MPOS=25;NALOD=-3.290e+01;NLOD=54.91;POPAF=6.00;TLOD=23.15;ANN=T|synonymous_variant|LOW|AW822073|ENSMUSG00000058537|transcript|ENSMUST00000174056|protein_coding|1/2|c.297G>A|p.Ser99Ser|1073/2586|297/1137|99/378||,T|downstream_gene_variant|MODIFIER|Gm10807|ENSMUSG00000057216|transcript|ENSMUST…	GT:AD:AF:DP:F1R2:F2R1:PGT:PID:PS:SB	0|0:499,13:0.023:512:205,6:278,7:0|1:58224627_G_A:58224627:282,217,6,7	0|1:413,8:0.019:421:182,5:216,3:0|1:58224627_G_A:58224627:251,162,5,3	RY1114T6	chr10_58224634_C>T	499	13	413	8	synonymous_variant	LOW	AW822073	.	snv	C>T	G:C>A:T	4	.
chr10	58224643	.	TC	AT	.	clustered_events;normal_artifact	AS_FilterStatus=SITE;AS_SB_TABLE=523,453|17,11;DP=1047;ECNT=7;GERMQ=93;MBQ=20,20;MFRL=152,135;MMQ=27,38;MPOS=26;NALOD=-1.969e+01;NLOD=77.97;POPAF=6.00;TLOD=57.83;ANN=AT|missense_variant|MODERATE|AW822073|ENSMUSG00000058537|transcript|ENSMUST00000174056|protein_coding|1/2|c.287_288delGAinsAT|p.Arg96His|1064/2586|287/1137|96/378||,AT|downstream_gene_variant|MODIFIER|Gm10807|ENSMUSG00000057216|trans…	GT:AD:AF:DP:F1R2:F2R1:SB	0/0:528,8:0.016:536:233,1:283,7:273,255,4,4	0/1:448,20:0.042:468:189,7:239,13:250,198,13,7	RY1114T6	chr10_58224643_TC>AT	528	8	448	20	missense_variant	MODERATE	AW822073	.	indel	.	.	4	.
chr10	58224676	.	G	A	.	clustered_events;map_qual;normal_artifact	AS_FilterStatus=map_qual;AS_SB_TABLE=468,573|30,41;DP=1132;ECNT=7;GERMQ=93;MBQ=22,27;MFRL=148,156;MMQ=27,27;MPOS=28;NALOD=-5.580e+01;NLOD=33.03;POPAF=6.00;TLOD=55.11;ANN=A|synonymous_variant|LOW|AW822073|ENSMUSG00000058537|transcript|ENSMUST00000174056|protein_coding|1/2|c.255C>T|p.Gly85Gly|1031/2586|255/1137|85/378||,A|downstream_gene_variant|MODIFIER|Gm10807|ENSMUSG00000057216|transcript|ENSMUS…	GT:AD:AF:DP:F1R2:F2R1:SB	0/0:564,36:0.063:600:247,16:316,20:247,317,15,21	0/1:477,35:0.069:512:214,15:259,20:221,256,15,20	RY1114T6	chr10_58224676_G>A	564	36	477	35	synonymous_variant	LOW	AW822073	.	snv	G>A	G:C>A:T	4	.
chr10	58224722	.	G	A	.	clustered_events;map_qual;normal_artifact	AS_FilterStatus=map_qual;AS_SB_TABLE=233,519|4,8;DP=801;ECNT=7;GERMQ=93;MBQ=20,34;MFRL=150,177;MMQ=27,27;MPOS=17;NALOD=-1.646e+01;NLOD=60.19;POPAF=6.00;TLOD=8.99;ANN=A|missense_variant|MODERATE|AW822073|ENSMUSG00000058537|transcript|ENSMUST00000174056|protein_coding|1/2|c.209C>T|p.Ser70Leu|985/2586|209/1137|70/378||,A|downstream_gene_variant|MODIFIER|Gm10807|ENSMUSG00000057216|transcript|ENSMUST0…	GT:AD:AF:DP:F1R2:F2R1:SB	0/0:398,8:0.017:406:176,2:210,6:123,275,3,5	0/1:354,4:0.018:358:157,2:192,2:110,244,1,3	RY1114T6	chr10_58224722_G>A	398	8	354	4	missense_variant	MODERATE	AW822073	.	snv	G>A	G:C>A:T	4	.
chr10	58227904	.	G	A	.	clustered_events;map_qual;normal_artifact;strand_bias	AS_FilterStatus=map_qual,strand_bias;AS_SB_TABLE=592,28|41,0;DP=687;ECNT=9;GERMQ=93;MBQ=37,35;MFRL=173,175;MMQ=27,27;MPOS=17;NALOD=-5.197e+01;NLOD=10.24;POPAF=6.00;TLOD=50.91;ANN=A|upstream_gene_variant|MODIFIER|AW822073|ENSMUSG00000058537|transcript|ENSMUST00000174056|protein_coding||c.-2974C>T|||||2198|,A|downstream_gene_variant|MODIFIER|4933403O03Rik|ENSMUSG00000075046|transcript|ENSMUST000001…	GT:AD:AF:DP:F1R2:F2R1:SB	0/0:309,20:0.065:329:139,12:167,8:294,15,20,0	0/1:311,21:0.065:332:129,9:181,12:298,13,21,0	RY1114T6	chr10_58227904_G>A	309	20	311	21	upstream_gene_variant	MODIFIER	AW822073	.	snv	G>A	G:C>A:T	3	.
chr10	58227922	.	T	A	.	clustered_events;map_qual;normal_artifact	AS_FilterStatus=map_qual;AS_SB_TABLE=769,76|51,1;DP=959;ECNT=9;GERMQ=93;MBQ=34,36;MFRL=169,168;MMQ=27,27;MPOS=29;NALOD=-5.254e+01;NLOD=32.98;POPAF=6.00;TLOD=68.37;ANN=A|upstream_gene_variant|MODIFIER|AW822073|ENSMUSG00000058537|transcript|ENSMUST00000174056|protein_coding||c.-2992A>T|||||2216|,A|downstream_gene_variant|MODIFIER|4933403O03Rik|ENSMUSG00000075046|transcript|ENSMUST00000176875|proces…	GT:AD:AF:DP:F1R2:F2R1:SB	0/0:417,22:0.053:439:186,14:228,8:381,36,22,0	0/1:428,30:0.067:458:189,13:228,17:388,40,29,1	RY1114T6	chr10_58227922_T>A	417	22	428	30	upstream_gene_variant	MODIFIER	AW822073	.	snv	T>A	A:T>T:A	4	.
chr10	58227933	.	G	A	.	clustered_events;map_qual;normal_artifact	AS_FilterStatus=map_qual;AS_SB_TABLE=886,242|28,12;DP=1218;ECNT=9;GERMQ=93;MBQ=37,20;MFRL=164,172;MMQ=27,25;MPOS=13;NALOD=-1.224e+01;NLOD=110.17;POPAF=6.00;TLOD=25.01;ANN=A|upstream_gene_variant|MODIFIER|AW822073|ENSMUSG00000058537|transcript|ENSMUST00000174056|protein_coding||c.-3003C>T|||||2227|,A|downstream_gene_variant|MODIFIER|4933403O03Rik|ENSMUSG00000075046|transcript|ENSMUST00000176875|pr…	GT:AD:AF:DP:F1R2:F2R1:SB	0/0:579,17:0.017:596:268,5:304,12:449,130,12,5	0/1:549,23:0.029:572:252,9:292,14:437,112,16,7	RY1114T6	chr10_58227933_G>A	579	17	549	23	upstream_gene_variant	MODIFIER	AW822073	.	snv	G>A	G:C>A:T	3	.
chr10	58227952	.	G	A	.	clustered_events;map_qual;normal_artifact	AS_FilterStatus=map_qual;AS_SB_TABLE=1073,474|21,12;DP=1640;ECNT=9;GERMQ=93;MBQ=34,35;MFRL=158,163;MMQ=27,27;MPOS=29;NALOD=-7.087e+00;NLOD=159.99;POPAF=6.00;TLOD=14.16;ANN=A|upstream_gene_variant|MODIFIER|AW822073|ENSMUSG00000058537|transcript|ENSMUST00000174056|protein_coding||c.-3022C>T|||||2246|,A|downstream_gene_variant|MODIFIER|4933403O03Rik|ENSMUSG00000075046|transcript|ENSMUST00000176875|p…	GT:AD:AF:DP:F1R2:F2R1:SB	0/0:797,16:0.012:813:368,5:419,11:553,244,11,5	0/1:750,17:0.021:767:336,6:407,11:520,230,10,7	RY1114T6	chr10_58227952_G>A	797	16	750	17	upstream_gene_variant	MODIFIER	AW822073	.	snv	G>A	G:C>A:T	3	.
chr10	58227956	.	A	C	.	clustered_events;map_qual;normal_artifact	AS_FilterStatus=map_qual;AS_SB_TABLE=1105,518|35,14;DP=1718;ECNT=9;GERMQ=93;MBQ=34,31;MFRL=158,156;MMQ=27,27;MPOS=14;NALOD=-4.457e+01;NLOD=114.13;POPAF=6.00;TLOD=22.15;ANN=C|upstream_gene_variant|MODIFIER|AW822073|ENSMUSG00000058537|transcript|ENSMUST00000174056|protein_coding||c.-3026T>G|||||2250|,C|downstream_gene_variant|MODIFIER|4933403O03Rik|ENSMUSG00000075046|transcript|ENSMUST00000176875|p…	GT:AD:AF:DP:F1R2:F2R1:SB	0/0:846,30:0.034:876:378,16:460,13:578,268,20,10	0/1:777,19:0.027:796:340,10:430,8:527,250,15,4	RY1114T6	chr10_58227956_A>C	846	30	777	19	upstream_gene_variant	MODIFIER	AW822073	.	snv	A>C	A:T>C:G	4	.
chr10	58227991	.	G	A	.	clustered_events;map_qual;normal_artifact	AS_FilterStatus=map_qual;AS_SB_TABLE=1246,1008|29,25;DP=2339;ECNT=9;GERMQ=93;MBQ=20,20;MFRL=153,157;MMQ=33,27;MPOS=27;NALOD=-3.362e+01;NLOD=185.22;POPAF=6.00;TLOD=28.80;ANN=A|upstream_gene_variant|MODIFIER|AW822073|ENSMUSG00000058537|transcript|ENSMUST00000174056|protein_coding||c.-3061C>T|||||2285|,A|downstream_gene_variant|MODIFIER|4933403O03Rik|ENSMUSG00000075046|transcript|ENSMUST00000176875|…	GT:AD:AF:DP:F1R2:F2R1:SB	0/0:1161,28:0.024:1189:503,14:649,14:641,520,15,13	0/1:1093,26:0.024:1119:473,7:610,19:605,488,14,12	RY1114T6	chr10_58227991_G>A	1161	28	1093	26	upstream_gene_variant	MODIFIER	AW822073	.	snv	G>A	G:C>A:T	4	.
chr10	58228030	.	C	T	.	clustered_events;map_qual;normal_artifact	AS_FilterStatus=map_qual;AS_SB_TABLE=768,1209|16,26;DP=2083;ECNT=9;GERMQ=93;MBQ=20,20;MFRL=152,146;MMQ=27,27;MPOS=31;NALOD=-1.748e+01;NLOD=181.04;POPAF=6.00;TLOD=13.24;ANN=T|upstream_gene_variant|MODIFIER|AW822073|ENSMUSG00000058537|transcript|ENSMUST00000174056|protein_coding||c.-3100G>A|||||2324|,T|downstream_gene_variant|MODIFIER|4933403O03Rik|ENSMUSG00000075046|transcript|ENSMUST00000176875|p…	GT:AD:AF:DP:F1R2:F2R1:SB	0/0:1015,24:0.017:1039:414,13:587,11:391,624,9,15	0/1:962,18:0.011:980:388,10:563,8:377,585,7,11	RY1114T6	chr10_58228030_C>T	1015	24	962	18	upstream_gene_variant	MODIFIER	AW822073	.	snv	C>T	G:C>A:T	4	.
chr10	58228044	.	T	G	.	clustered_events;map_qual;normal_artifact	AS_FilterStatus=map_qual;AS_SB_TABLE=607,1134|28,45;DP=1833;ECNT=9;GERMQ=93;MBQ=20,20;MFRL=153,163;MMQ=27,27;MPOS=23;NALOD=-4.235e+01;NLOD=120.09;POPAF=6.00;TLOD=67.33;ANN=G|upstream_gene_variant|MODIFIER|AW822073|ENSMUSG00000058537|transcript|ENSMUST00000174056|protein_coding||c.-3114A>C|||||2338|,G|downstream_gene_variant|MODIFIER|4933403O03Rik|ENSMUSG00000075046|transcript|ENSMUST00000176875|p…	GT:AD:AF:DP:F1R2:F2R1:SB	0/0:903,29:0.033:932:359,12:505,17:313,590,10,19	0/1:838,44:0.049:882:334,17:471,27:294,544,18,26	RY1114T6	chr10_58228044_T>G	903	29	838	44	upstream_gene_variant	MODIFIER	AW822073	.	snv	T>G	A:T>C:G	4	.
chr10	58228090	.	A	T	.	clustered_events;map_qual;normal_artifact	AS_FilterStatus=map_qual;AS_SB_TABLE=0,654|0,18;DP=690;ECNT=9;GERMQ=93;MBQ=34,35;MFRL=170,167;MMQ=27,27;MPOS=35;NALOD=-7.116e+00;NLOD=77.91;POPAF=6.00;TLOD=9.42;ANN=T|upstream_gene_variant|MODIFIER|AW822073|ENSMUSG00000058537|transcript|ENSMUST00000174056|protein_coding||c.-3160T>A|||||2384|,T|downstream_gene_variant|MODIFIER|4933403O03Rik|ENSMUSG00000075046|transcript|ENSMUST00000176875|processe…	GT:AD:AF:DP:F1R2:F2R1:SB	0/0:332,8:0.025:340:128,5:202,3:0,332,0,8	0/1:322,10:0.032:332:129,6:186,4:0,322,0,10	RY1114T6	chr10_58228090_A>T	332	8	322	10	upstream_gene_variant	MODIFIER	AW822073	.	snv	A>T	A:T>T:A	4	.
chr10	58228182	.	C	T	.	map_qual;normal_artifact;weak_evidence	AS_FilterStatus=weak_evidence,map_qual;AS_SB_TABLE=71,56|3,1;DP=147;ECNT=1;GERMQ=93;MBQ=36,36;MFRL=236,216;MMQ=25,24;MPOS=19;NALOD=0.607;NLOD=13.36;POPAF=6.00;TLOD=3.60;ANN=T|upstream_gene_variant|MODIFIER|AW822073|ENSMUSG00000058537|transcript|ENSMUST00000174056|protein_coding||c.-3252G>A|||||2476|,T|downstream_gene_variant|MODIFIER|4933403O03Rik|ENSMUSG00000075046|transcript|ENSMUST00000176875|…	GT:AD:AF:DP:F1R2:F2R1:SB	0/0:53,1:0.034:54:27,1:26,0:29,24,1,0	0/1:74,3:0.050:77:34,0:38,3:42,32,2,1	RY1114T6	chr10_58228182_C>T	53	1	74	3	upstream_gene_variant	MODIFIER	AW822073	.	snv	C>T	G:C>A:T	1	.
chr10	58228455	.	G	A	.	haplotype;normal_artifact	AS_FilterStatus=SITE;AS_SB_TABLE=296,494|10,33;DP=843;ECNT=2;GERMQ=93;MBQ=31,34;MFRL=148,161;MMQ=43,40;MPOS=35;NALOD=-1.590e+01;NLOD=56.26;POPAF=6.00;TLOD=13.32;ANN=A|upstream_gene_variant|MODIFIER|AW822073|ENSMUSG00000058537|transcript|ENSMUST00000174056|protein_coding||c.-3525C>T|||||2749|,A|upstream_gene_variant|MODIFIER|Gm10807|ENSMUSG00000057216|transcript|ENSMUST00000071408|processed_pseudo…	GT:AD:AF:DP:F1R2:F2R1:PGT:PID:PS:SB	0|0:395,23:0.038:418:137,7:244,15:0|1:58228455_G_A:58228455:153,242,6,17	0|1:395,20:0.031:415:150,11:240,9:0|1:58228455_G_A:58228455:143,252,4,16	RY1114T6	chr10_58228455_G>A	395	23	395	20	upstream_gene_variant	MODIFIER	AW822073	.	snv	G>A	G:C>A:T	4	.
chr10	58228458	.	C	T	.	haplotype;normal_artifact;weak_evidence	AS_FilterStatus=weak_evidence;AS_SB_TABLE=287,503|5,23;DP=819;ECNT=2;GERMQ=93;MBQ=36,35;MFRL=149,160;MMQ=42,49;MPOS=31;NALOD=1.06;NLOD=87.78;POPAF=6.00;TLOD=4.61;ANN=T|upstream_gene_variant|MODIFIER|AW822073|ENSMUSG00000058537|transcript|ENSMUST00000174056|protein_coding||c.-3528G>A|||||2752|,T|upstream_gene_variant|MODIFIER|Gm10807|ENSMUSG00000057216|transcript|ENSMUST00000071408|processed_pseud…	GT:AD:AF:DP:F1R2:F2R1:PGT:PID:PS:SB	0|0:394,12:8.860e-03:406:138,6:246,6:1|0:58228455_G_A:58228455:147,247,1,11	1|0:396,16:0.016:412:153,7:238,9:1|0:58228455_G_A:58228455:140,256,4,12	RY1114T6	chr10_58228458_C>T	394	12	396	16	upstream_gene_variant	MODIFIER	AW822073	.	snv	C>T	G:C>A:T	3	.
chr10	58231194	.	T	A	.	clustered_events;haplotype;strand_bias	AS_FilterStatus=strand_bias;AS_SB_TABLE=65,55|3,0;DP=125;ECNT=8;GERMQ=93;MBQ=24,36;MFRL=155,151;MMQ=57,33;MPOS=33;NALOD=1.70;NLOD=14.45;POPAF=6.00;TLOD=6.16;ANN=A|upstream_gene_variant|MODIFIER|Gm10807|ENSMUSG00000057216|transcript|ENSMUST00000071408|processed_pseudogene||n.-2783A>T|||||2783|,A|downstream_gene_variant|MODIFIER|Gm4981|ENSMUSG00000075045|transcript|ENSMUST00000099726|protein_coding…	GT:AD:AF:DP:F1R2:F2R1:PGT:PID:PS:SB	0|0:64,0:0.020:64:13,0:42,0:0|1:58231194_T_A:58231194:34,30,0,0	0|1:56,3:0.082:59:12,0:38,1:0|1:58231194_T_A:58231194:31,25,3,0	RY1114T6	chr10_58231194_T>A	64	0	56	3	upstream_gene_variant	MODIFIER	Gm10807	PASS	snv	T>A	A:T>T:A	3	.
chr10	58231205	.	G	T	.	clustered_events;haplotype;normal_artifact;strand_bias	AS_FilterStatus=strand_bias;AS_SB_TABLE=108,58|6,0;DP=186;ECNT=8;GERMQ=93;MBQ=35,35;MFRL=156,149;MMQ=40,39;MPOS=9;NALOD=-2.333e+00;NLOD=12.91;POPAF=6.00;TLOD=7.91;ANN=T|upstream_gene_variant|MODIFIER|Gm10807|ENSMUSG00000057216|transcript|ENSMUST00000071408|processed_pseudogene||n.-2794C>A|||||2794|,T|downstream_gene_variant|MODIFIER|Gm4981|ENSMUSG00000075045|transcript|ENSMUST00000099726|protein_…	GT:AD:AF:DP:F1R2:F2R1:PGT:PID:PS:SB	0|0:84,2:0.042:86:26,1:54,1:0|1:58231194_T_A:58231194:52,32,2,0	0|1:82,4:0.066:86:26,2:52,2:0|1:58231194_T_A:58231194:56,26,4,0	RY1114T6	chr10_58231205_G>T	84	2	82	4	upstream_gene_variant	MODIFIER	Gm10807	.	snv	G>T	G:C>T:A	3	.
chr10	58231235	.	A	T	.	clustered_events;normal_artifact	AS_FilterStatus=SITE;AS_SB_TABLE=300,122|8,1;DP=462;ECNT=8;GERMQ=93;MBQ=35,37;MFRL=143,151;MMQ=57,40;MPOS=21;NALOD=-1.662e+00;NLOD=46.28;POPAF=6.00;TLOD=12.66;ANN=T|upstream_gene_variant|MODIFIER|Gm10807|ENSMUSG00000057216|transcript|ENSMUST00000071408|processed_pseudogene||n.-2824T>A|||||2824|,T|downstream_gene_variant|MODIFIER|Gm4981|ENSMUSG00000075045|transcript|ENSMUST00000099726|protein_codi…	GT:AD:AF:DP:F1R2:F2R1:SB	0/0:204,2:0.016:206:89,2:108,0:142,62,2,0	0/1:218,7:0.040:225:88,1:126,6:158,60,6,1	RY1114T6	chr10_58231235_A>T	204	2	218	7	upstream_gene_variant	MODIFIER	Gm10807	.	snv	A>T	A:T>T:A	4	.
chr10	58231249	.	G	A	.	clustered_events;normal_artifact	AS_FilterStatus=SITE;AS_SB_TABLE=422,208|35,18;DP=715;ECNT=8;GERMQ=93;MBQ=30,36;MFRL=146,144;MMQ=57,42;MPOS=14;NALOD=-4.115e+01;NLOD=13.62;POPAF=6.00;TLOD=68.02;ANN=A|upstream_gene_variant|MODIFIER|Gm10807|ENSMUSG00000057216|transcript|ENSMUST00000071408|processed_pseudogene||n.-2838C>T|||||2838|,A|downstream_gene_variant|MODIFIER|Gm4981|ENSMUSG00000075045|transcript|ENSMUST00000099726|protein_co…	GT:AD:AF:DP:F1R2:F2R1:SB	0/0:309,20:0.061:329:126,10:173,10:203,106,14,6	0/1:321,33:0.099:354:125,18:190,14:219,102,21,12	RY1114T6	chr10_58231249_G>A	309	20	321	33	upstream_gene_variant	MODIFIER	Gm10807	.	snv	G>A	G:C>A:T	4	.
chr10	58231252	.	C	T	.	clustered_events;normal_artifact	AS_FilterStatus=SITE;AS_SB_TABLE=473,231|10,7;DP=755;ECNT=8;GERMQ=93;MBQ=35,32;MFRL=146,129;MMQ=57,40;MPOS=23;NALOD=-1.341e+01;NLOD=53.77;POPAF=6.00;TLOD=7.41;ANN=T|upstream_gene_variant|MODIFIER|Gm10807|ENSMUSG00000057216|transcript|ENSMUST00000071408|processed_pseudogene||n.-2841G>A|||||2841|,T|downstream_gene_variant|MODIFIER|Gm4981|ENSMUSG00000075045|transcript|ENSMUST00000099726|protein_codi…	GT:AD:AF:DP:F1R2:F2R1:SB	0/0:329,11:0.031:340:140,6:187,5:220,109,5,6	0/1:375,6:0.019:381:153,1:219,5:253,122,5,1	RY1114T6	chr10_58231252_C>T	329	11	375	6	upstream_gene_variant	MODIFIER	Gm10807	.	snv	C>T	G:C>A:T	4	.
chr10	58231261	.	A	C	.	clustered_events;normal_artifact;weak_evidence	AS_FilterStatus=weak_evidence;AS_SB_TABLE=550,304|11,6;DP=916;ECNT=8;GERMQ=93;MBQ=35,34;MFRL=146,141;MMQ=57,55;MPOS=23;NALOD=-1.782e+01;NLOD=61.30;POPAF=6.00;TLOD=3.64;ANN=C|upstream_gene_variant|MODIFIER|Gm10807|ENSMUSG00000057216|transcript|ENSMUST00000071408|processed_pseudogene||n.-2850T>G|||||2850|,C|downstream_gene_variant|MODIFIER|Gm4981|ENSMUSG00000075045|transcript|ENSMUST00000099726|pro…	GT:AD:AF:DP:F1R2:F2R1:SB	0/0:409,13:0.032:422:177,6:228,7:261,148,8,5	0/1:445,4:0.013:449:178,2:264,2:289,156,3,1	RY1114T6	chr10_58231261_A>C	409	13	445	4	upstream_gene_variant	MODIFIER	Gm10807	.	snv	A>C	A:T>C:G	4	.
chr10	58231274	.	G	A	.	clustered_events;normal_artifact	AS_FilterStatus=SITE;AS_SB_TABLE=686,377|28,11;DP=1132;ECNT=8;GERMQ=93;MBQ=35,35;MFRL=148,154;MMQ=57,57;MPOS=26;NALOD=-2.850e+01;NLOD=67.22;POPAF=6.00;TLOD=33.51;ANN=A|upstream_gene_variant|MODIFIER|Gm10807|ENSMUSG00000057216|transcript|ENSMUST00000071408|processed_pseudogene||n.-2863C>T|||||2863|,A|downstream_gene_variant|MODIFIER|Gm4981|ENSMUSG00000075045|transcript|ENSMUST00000099726|protein_c…	GT:AD:AF:DP:F1R2:F2R1:SB	0/0:524,20:0.038:544:226,8:293,11:334,190,12,8	0/1:539,19:0.038:558:229,12:306,7:352,187,16,3	RY1114T6	chr10_58231274_G>A	524	20	539	19	upstream_gene_variant	MODIFIER	Gm10807	.	snv	G>A	G:C>A:T	4	.
chr10	58231290	.	C	G	.	clustered_events;normal_artifact	AS_FilterStatus=SITE;AS_SB_TABLE=832,476|23,13;DP=1373;ECNT=8;GERMQ=93;MBQ=20,20;MFRL=149,139;MMQ=57,57;MPOS=29;NALOD=-3.731e+01;NLOD=78.11;POPAF=6.00;TLOD=16.98;ANN=G|upstream_gene_variant|MODIFIER|Gm10807|ENSMUSG00000057216|transcript|ENSMUST00000071408|processed_pseudogene||n.-2879G>C|||||2879|,G|downstream_gene_variant|MODIFIER|Gm4981|ENSMUSG00000075045|transcript|ENSMUST00000099726|protein_c…	GT:AD:AF:DP:F1R2:F2R1:SB	0/0:633,23:0.034:656:280,6:351,17:401,232,14,9	0/1:675,13:0.019:688:282,10:390,3:431,244,9,4	RY1114T6	chr10_58231290_C>G	633	23	675	13	upstream_gene_variant	MODIFIER	Gm10807	.	snv	C>G	G:C>C:G	4	.
chr10	58231343	.	GC	AG	.	clustered_events;normal_artifact	AS_FilterStatus=SITE;AS_SB_TABLE=770,655|21,22;DP=1534;ECNT=4;GERMQ=93;MBQ=31,37;MFRL=156,164;MMQ=40,43;MPOS=23;NALOD=-1.239e+01;NLOD=127.34;POPAF=6.00;TLOD=46.24;ANN=AG|upstream_gene_variant|MODIFIER|Gm10807|ENSMUSG00000057216|transcript|ENSMUST00000071408|processed_pseudogene||n.-2933_-2932delGCinsCT|||||2932|,AG|downstream_gene_variant|MODIFIER|Gm4981|ENSMUSG00000075045|transcript|ENSMUST00000…	GT:AD:AF:DP:F1R2:F2R1:SB	0/0:702,13:0.017:715:310,9:387,4:372,330,9,4	0/1:723,30:0.044:753:309,9:408,21:398,325,12,18	RY1114T6	chr10_58231343_GC>AG	702	13	723	30	upstream_gene_variant	MODIFIER	Gm10807	.	indel	.	.	4	.
chr10	58231445	.	A	C	.	clustered_events;map_qual;normal_artifact;strand_bias	AS_FilterStatus=map_qual,strand_bias;AS_SB_TABLE=63,443|0,11;DP=526;ECNT=4;GERMQ=93;MBQ=37,31;MFRL=191,180;MMQ=27,27;MPOS=27;NALOD=-1.168e+01;NLOD=45.06;POPAF=6.00;TLOD=8.84;ANN=C|upstream_gene_variant|MODIFIER|Gm10807|ENSMUSG00000057216|transcript|ENSMUST00000071408|processed_pseudogene||n.-3034T>G|||||3034|,C|downstream_gene_variant|MODIFIER|Gm4981|ENSMUSG00000075045|transcript|ENSMUST000000997…	GT:AD:AF:DP:F1R2:F2R1:SB	0/0:248,6:0.029:254:107,1:139,5:32,216,0,6	0/1:258,5:0.023:263:102,0:151,5:31,227,0,5	RY1114T6	chr10_58231445_A>C	248	6	258	5	upstream_gene_variant	MODIFIER	Gm10807	.	snv	A>C	A:T>C:G	4	.
chr10	58231525	.	C	T	.	clustered_events;weak_evidence	AS_FilterStatus=weak_evidence;AS_SB_TABLE=7,125|0,3;DP=137;ECNT=4;GERMQ=93;MBQ=36,35;MFRL=222,220;MMQ=33,40;MPOS=23;NALOD=1.82;NLOD=19.12;POPAF=6.00;TLOD=4.32;ANN=T|upstream_gene_variant|MODIFIER|Gm10807|ENSMUSG00000057216|transcript|ENSMUST00000071408|processed_pseudogene||n.-3114G>A|||||3114|,T|downstream_gene_variant|MODIFIER|Gm4981|ENSMUSG00000075045|transcript|ENSMUST00000099726|protein_codi…	GT:AD:AF:DP:F1R2:F2R1:SB	0/0:64,0:0.015:64:23,0:38,0:5,59,0,0	0/1:68,3:0.054:71:28,2:39,1:2,66,0,3	RY1114T6	chr10_58231525_C>T	64	0	68	3	upstream_gene_variant	MODIFIER	Gm10807	PASS	snv	C>T	G:C>A:T	3	.
chr10	58231783	.	C	A	.	clustered_events;haplotype;map_qual;strand_bias;weak_evidence	AS_FilterStatus=weak_evidence,map_qual,strand_bias;AS_SB_TABLE=112,53|2,0;DP=168;ECNT=5;GERMQ=93;MBQ=36,37;MFRL=188,185;MMQ=40,27;MPOS=34;NALOD=1.82;NLOD=19.57;POPAF=6.00;TLOD=3.50;ANN=A|upstream_gene_variant|MODIFIER|Gm10807|ENSMUSG00000057216|transcript|ENSMUST00000071408|processed_pseudogene||n.-3372G>T|||||3372|,A|downstream_gene_variant|MODIFIER|Gm4981|ENSMUSG00000075045|transcript|ENSMUST00…	GT:AD:AF:DP:F1R2:F2R1:PGT:PID:PS:SB	0|0:72,0:0.015:72:32,0:39,0:0|1:58231783_C_A:58231783:45,27,0,0	0|1:93,2:0.034:95:43,1:46,1:0|1:58231783_C_A:58231783:67,26,2,0	RY1114T6	chr10_58231783_C>A	72	0	93	2	upstream_gene_variant	MODIFIER	Gm10807	.	snv	C>A	G:C>T:A	3	.
chr10	58231784	.	A	T	.	clustered_events;map_qual;normal_artifact	AS_FilterStatus=map_qual;AS_SB_TABLE=92,50|20,2;DP=169;ECNT=5;GERMQ=93;MBQ=35,38;MFRL=185,202;MMQ=40,27;MPOS=36;NALOD=-5.695e+00;NLOD=5.95;POPAF=6.00;TLOD=45.70;ANN=T|upstream_gene_variant|MODIFIER|Gm10807|ENSMUSG00000057216|transcript|ENSMUST00000071408|processed_pseudogene||n.-3373T>A|||||3373|,T|downstream_gene_variant|MODIFIER|Gm4981|ENSMUSG00000075045|transcript|ENSMUST00000099726|protein_co…	GT:AD:AF:DP:F1R2:F2R1:SB	0/0:67,4:0.075:71:30,2:37,2:41,26,4,0	0/1:75,18:0.221:93:36,8:37,10:51,24,16,2	RY1114T6	chr10_58231784_A>T	67	4	75	18	upstream_gene_variant	MODIFIER	Gm10807	.	snv	A>T	A:T>T:A	2	.
chr10	58231789	.	C	A	.	clustered_events;haplotype;map_qual;normal_artifact;strand_bias	AS_FilterStatus=map_qual,strand_bias;AS_SB_TABLE=115,52|4,0;DP=171;ECNT=5;GERMQ=93;MBQ=37,37;MFRL=190,161;MMQ=40,27;MPOS=34;NALOD=0.471;NLOD=16.99;POPAF=6.00;TLOD=6.49;ANN=A|upstream_gene_variant|MODIFIER|Gm10807|ENSMUSG00000057216|transcript|ENSMUST00000071408|processed_pseudogene||n.-3378G>T|||||3378|,A|downstream_gene_variant|MODIFIER|Gm4981|ENSMUSG00000075045|transcript|ENSMUST00000099726|pro…	GT:AD:AF:DP:F1R2:F2R1:PGT:PID:PS:SB	0|0:72,1:0.029:73:32,0:39,0:0|1:58231783_C_A:58231783:46,26,1,0	0|1:95,3:0.044:98:44,2:47,1:0|1:58231783_C_A:58231783:69,26,3,0	RY1114T6	chr10_58231789_C>A	72	1	95	3	upstream_gene_variant	MODIFIER	Gm10807	.	snv	C>A	G:C>T:A	3	.
chr10	58231795	.	T	C	.	clustered_events;haplotype;map_qual;normal_artifact;strand_bias	AS_FilterStatus=map_qual,strand_bias;AS_SB_TABLE=128,49|4,0;DP=188;ECNT=5;GERMQ=93;MBQ=37,36;MFRL=187,161;MMQ=39,27;MPOS=23;NALOD=0.600;NLOD=20.00;POPAF=6.00;TLOD=6.42;ANN=C|upstream_gene_variant|MODIFIER|Gm10807|ENSMUSG00000057216|transcript|ENSMUST00000071408|processed_pseudogene||n.-3384A>G|||||3384|,C|downstream_gene_variant|MODIFIER|Gm4981|ENSMUSG00000075045|transcript|ENSMUST00000099726|pro…	GT:AD:AF:DP:F1R2:F2R1:PGT:PID:PS:SB	0|0:82,1:0.025:83:38,0:39,1:0|1:58231783_C_A:58231783:56,26,1,0	0|1:95,3:0.042:98:44,2:50,1:0|1:58231783_C_A:58231783:72,23,3,0	RY1114T6	chr10_58231795_T>C	82	1	95	3	upstream_gene_variant	MODIFIER	Gm10807	.	snv	T>C	A:T>G:C	3	.
chr10	58231822	.	G	A	.	clustered_events;map_qual;normal_artifact	AS_FilterStatus=map_qual;AS_SB_TABLE=221,64|7,3;DP=312;ECNT=5;GERMQ=93;MBQ=36,20;MFRL=171,140;MMQ=40,27;MPOS=15;NALOD=-7.109e-01;NLOD=29.08;POPAF=6.00;TLOD=10.92;ANN=A|upstream_gene_variant|MODIFIER|Gm10807|ENSMUSG00000057216|transcript|ENSMUST00000071408|processed_pseudogene||n.-3411C>T|||||3411|,A|downstream_gene_variant|MODIFIER|Gm4981|ENSMUSG00000075045|transcript|ENSMUST00000099726|protein_c…	GT:AD:AF:DP:F1R2:F2R1:SB	0/0:126,2:0.017:128:60,0:64,2:98,28,1,1	0/1:159,8:0.048:167:70,5:88,3:123,36,6,2	RY1114T6	chr10_58231822_G>A	126	2	159	8	upstream_gene_variant	MODIFIER	Gm10807	.	snv	G>A	G:C>A:T	3	.
chr10	58231884	.	C	T	.	clustered_events;haplotype;normal_artifact	AS_FilterStatus=SITE;AS_SB_TABLE=671,314|25,12;DP=1030;ECNT=10;GERMQ=93;MBQ=33,20;MFRL=150,136;MMQ=57,48;MPOS=32;NALOD=-5.565e+01;NLOD=40.04;POPAF=6.00;TLOD=64.20;ANN=T|upstream_gene_variant|MODIFIER|Gm10807|ENSMUSG00000057216|transcript|ENSMUST00000071408|processed_pseudogene||n.-3473G>A|||||3473|,T|downstream_gene_variant|MODIFIER|Gm4981|ENSMUSG00000075045|transcript|ENSMUST00000099726|protein_…	GT:AD:AF:DP:F1R2:F2R1:PGT:PID:PS:SB	0|0:499,17:0.030:516:233,4:252,13:0|1:58231884_C_T:58231884:345,154,11,6	0|1:486,20:0.043:506:189,9:285,11:0|1:58231884_C_T:58231884:326,160,14,6	RY1114T6	chr10_58231884_C>T	499	17	486	20	upstream_gene_variant	MODIFIER	Gm10807	.	snv	C>T	G:C>A:T	4	.
chr10	58231888	.	T	C	.	clustered_events;normal_artifact	AS_FilterStatus=SITE;AS_SB_TABLE=681,334|23,15;DP=1091;ECNT=10;GERMQ=93;MBQ=28,20;MFRL=149,139;MMQ=57,60;MPOS=25;NALOD=-3.988e+01;NLOD=47.50;POPAF=6.00;TLOD=21.54;ANN=C|upstream_gene_variant|MODIFIER|Gm10807|ENSMUSG00000057216|transcript|ENSMUST00000071408|processed_pseudogene||n.-3477A>G|||||3477|,C|downstream_gene_variant|MODIFIER|Gm4981|ENSMUSG00000075045|transcript|ENSMUST00000099726|protein_…	GT:AD:AF:DP:F1R2:F2R1:SB	0/0:504,24:0.045:528:234,10:266,14:344,160,15,9	0/1:511,14:0.027:525:198,7:303,7:337,174,8,6	RY1114T6	chr10_58231888_T>C	504	24	511	14	upstream_gene_variant	MODIFIER	Gm10807	.	snv	T>C	A:T>G:C	4	.
chr10	58231897	.	G	A	.	clustered_events;haplotype;normal_artifact	AS_FilterStatus=SITE;AS_SB_TABLE=760,392|25,15;DP=1192;ECNT=10;GERMQ=93;MBQ=33,26;MFRL=149,143;MMQ=57,51;MPOS=28;NALOD=-5.793e+01;NLOD=51.50;POPAF=6.00;TLOD=66.23;ANN=A|upstream_gene_variant|MODIFIER|Gm10807|ENSMUSG00000057216|transcript|ENSMUST00000071408|processed_pseudogene||n.-3486C>T|||||3486|,A|downstream_gene_variant|MODIFIER|Gm4981|ENSMUSG00000075045|transcript|ENSMUST00000099726|protein_…	GT:AD:AF:DP:F1R2:F2R1:PGT:PID:PS:SB	0|0:580,18:0.029:598:267,5:290,12:0|1:58231884_C_T:58231884:386,194,11,7	0|1:572,22:0.039:594:218,8:329,13:0|1:58231884_C_T:58231884:374,198,14,8	RY1114T6	chr10_58231897_G>A	580	18	572	22	upstream_gene_variant	MODIFIER	Gm10807	.	snv	G>A	G:C>A:T	4	.
chr10	58231898	.	G	T	.	clustered_events;normal_artifact	AS_FilterStatus=SITE;AS_SB_TABLE=744,396|29,9;DP=1198;ECNT=10;GERMQ=93;MBQ=33,34;MFRL=149,147;MMQ=57,53;MPOS=29;NALOD=-2.241e+01;NLOD=86.73;POPAF=6.00;TLOD=40.12;ANN=T|upstream_gene_variant|MODIFIER|Gm10807|ENSMUSG00000057216|transcript|ENSMUST00000071408|processed_pseudogene||n.-3487C>A|||||3487|,T|downstream_gene_variant|MODIFIER|Gm4981|ENSMUSG00000075045|transcript|ENSMUST00000099726|protein_c…	GT:AD:AF:DP:F1R2:F2R1:SB	0/0:580,14:0.029:594:269,5:299,9:382,198,11,3	0/1:560,24:0.044:584:222,8:328,16:362,198,18,6	RY1114T6	chr10_58231898_G>T	580	14	560	24	upstream_gene_variant	MODIFIER	Gm10807	.	snv	G>T	G:C>T:A	4	.
chr10	58231905	.	A	G	.	clustered_events;haplotype;normal_artifact	AS_FilterStatus=SITE;AS_SB_TABLE=788,440|27,16;DP=1302;ECNT=10;GERMQ=93;MBQ=33,20;MFRL=148,138;MMQ=57,48;MPOS=28;NALOD=-5.990e+01;NLOD=58.64;POPAF=6.00;TLOD=70.72;ANN=G|upstream_gene_variant|MODIFIER|Gm10807|ENSMUSG00000057216|transcript|ENSMUST00000071408|processed_pseudogene||n.-3494T>C|||||3494|,G|downstream_gene_variant|MODIFIER|Gm4981|ENSMUSG00000075045|transcript|ENSMUST00000099726|protein_…	GT:AD:AF:DP:F1R2:F2R1:PGT:PID:PS:SB	0|0:635,20:0.029:655:286,5:323,14:0|1:58231884_C_T:58231884:411,224,12,8	0|1:593,23:0.041:616:221,8:352,15:0|1:58231884_C_T:58231884:377,216,15,8	RY1114T6	chr10_58231905_A>G	635	20	593	23	upstream_gene_variant	MODIFIER	Gm10807	.	snv	A>G	A:T>G:C	4	.
chr10	58231933	.	G	T	.	clustered_events;haplotype;normal_artifact	AS_FilterStatus=SITE;AS_SB_TABLE=958,645|24,19;DP=1648;ECNT=10;GERMQ=93;MBQ=20,32;MFRL=147,155;MMQ=52,48;MPOS=17;NALOD=-6.591e+01;NLOD=85.94;POPAF=6.00;TLOD=53.19;ANN=T|upstream_gene_variant|MODIFIER|Gm10807|ENSMUSG00000057216|transcript|ENSMUST00000071408|processed_pseudogene||n.-3522C>A|||||3522|,T|downstream_gene_variant|MODIFIER|Gm4981|ENSMUSG00000075045|transcript|ENSMUST00000099726|protein_…	GT:AD:AF:DP:F1R2:F2R1:PGT:PID:PS:SB	0|0:853,23:0.029:876:373,13:461,9:0|1:58231933_G_T:58231933:515,338,14,9	0|1:750,20:0.029:770:278,4:447,15:0|1:58231933_G_T:58231933:443,307,10,10	RY1114T6	chr10_58231933_G>T	853	23	750	20	upstream_gene_variant	MODIFIER	Gm10807	.	snv	G>T	G:C>T:A	4	.
chr10	58231940	.	G	T	.	clustered_events;haplotype;normal_artifact	AS_FilterStatus=SITE;AS_SB_TABLE=962,698|25,18;DP=1737;ECNT=10;GERMQ=93;MBQ=20,25;MFRL=146,155;MMQ=51,48;MPOS=22;NALOD=-6.727e+01;NLOD=87.95;POPAF=6.00;TLOD=50.79;ANN=T|upstream_gene_variant|MODIFIER|Gm10807|ENSMUSG00000057216|transcript|ENSMUST00000071408|processed_pseudogene||n.-3529C>A|||||3529|,T|downstream_gene_variant|MODIFIER|Gm4981|ENSMUSG00000075045|transcript|ENSMUST00000099726|protein_…	GT:AD:AF:DP:F1R2:F2R1:PGT:PID:PS:SB	0|0:890,24:0.030:914:392,15:485,9:0|1:58231933_G_T:58231933:517,373,15,9	0|1:770,19:0.027:789:281,4:471,14:0|1:58231933_G_T:58231933:445,325,10,9	RY1114T6	chr10_58231940_G>T	890	24	770	19	upstream_gene_variant	MODIFIER	Gm10807	.	snv	G>T	G:C>T:A	4	.
chr10	58231954	.	C	T	.	clustered_events;haplotype;normal_artifact	AS_FilterStatus=SITE;AS_SB_TABLE=861,790|23,29;DP=1718;ECNT=10;GERMQ=93;MBQ=20,20;MFRL=146,142;MMQ=49,48;MPOS=32;NALOD=-6.449e+01;NLOD=91.79;POPAF=6.00;TLOD=96.80;ANN=T|upstream_gene_variant|MODIFIER|Gm10807|ENSMUSG00000057216|transcript|ENSMUST00000071408|processed_pseudogene||n.-3543G>A|||||3543|,T|downstream_gene_variant|MODIFIER|Gm4981|ENSMUSG00000075045|transcript|ENSMUST00000099726|protein_…	GT:AD:AF:DP:F1R2:F2R1:PGT:PID:PS:SB	0|0:888,22:0.027:910:384,13:477,9:0|1:58231954_C_T:58231954:467,421,10,12	0|1:763,30:0.034:793:261,13:477,17:0|1:58231954_C_T:58231954:394,369,13,17	RY1114T6	chr10_58231954_C>T	888	22	763	30	upstream_gene_variant	MODIFIER	Gm10807	.	snv	C>T	G:C>A:T	4	.
chr10	58231958	.	GC	G	.	clustered_events;haplotype;normal_artifact	AS_FilterStatus=SITE;AS_SB_TABLE=840,815|23,29;DP=1707;ECNT=10;GERMQ=93;MBQ=20,20;MFRL=146,142;MMQ=49,48;MPOS=34;NALOD=-6.452e+01;NLOD=90.94;POPAF=6.00;TLOD=96.86;ANN=G|upstream_gene_variant|MODIFIER|Gm10807|ENSMUSG00000057216|transcript|ENSMUST00000071408|processed_pseudogene||n.-3548delG|||||3548|,G|downstream_gene_variant|MODIFIER|Gm4981|ENSMUSG00000075045|transcript|ENSMUST00000099726|protein…	GT:AD:AF:DP:F1R2:F2R1:PGT:PID:PS:SB	0|0:889,22:0.027:911:378,12:473,8:0|1:58231954_C_T:58231954:456,433,10,12	0|1:766,30:0.034:796:258,13:472,17:0|1:58231954_C_T:58231954:384,382,13,17	RY1114T6	chr10_58231958_GC>G	889	22	766	30	upstream_gene_variant	MODIFIER	Gm10807	.	indel	.	.	4	.
chr10	58231961	.	G	A	.	clustered_events;haplotype;normal_artifact	AS_FilterStatus=SITE;AS_SB_TABLE=813,807|23,28;DP=1689;ECNT=10;GERMQ=93;MBQ=20,20;MFRL=146,142;MMQ=49,48;MPOS=33;NALOD=-6.200e+01;NLOD=93.01;POPAF=6.00;TLOD=96.92;ANN=A|upstream_gene_variant|MODIFIER|Gm10807|ENSMUSG00000057216|transcript|ENSMUST00000071408|processed_pseudogene||n.-3550C>T|||||3550|,A|downstream_gene_variant|MODIFIER|Gm4981|ENSMUSG00000075045|transcript|ENSMUST00000099726|protein_…	GT:AD:AF:DP:F1R2:F2R1:PGT:PID:PS:SB	0|0:867,21:0.026:888:368,13:471,8:0|1:58231954_C_T:58231954:439,428,10,11	0|1:753,30:0.034:783:259,13:466,17:0|1:58231954_C_T:58231954:374,379,13,17	RY1114T6	chr10_58231961_G>A	867	21	753	30	upstream_gene_variant	MODIFIER	Gm10807	.	snv	G>A	G:C>A:T	4	.
chr10	58231999	.	G	A	.	clustered_events;normal_artifact	AS_FilterStatus=SITE;AS_SB_TABLE=509,902|15,24;DP=1486;ECNT=11;GERMQ=93;MBQ=20,20;MFRL=149,131;MMQ=40,44;MPOS=29;NALOD=-2.583e+01;NLOD=103.92;POPAF=6.00;TLOD=17.56;ANN=A|upstream_gene_variant|MODIFIER|Gm10807|ENSMUSG00000057216|transcript|ENSMUST00000071408|processed_pseudogene||n.-3588C>T|||||3588|,A|downstream_gene_variant|MODIFIER|Gm4981|ENSMUSG00000075045|transcript|ENSMUST00000099726|protein…	GT:AD:AF:DP:F1R2:F2R1:SB	0/0:736,20:0.025:756:326,6:401,13:266,470,7,13	0/1:675,19:0.021:694:227,4:441,14:243,432,8,11	RY1114T6	chr10_58231999_G>A	736	20	675	19	upstream_gene_variant	MODIFIER	Gm10807	.	snv	G>A	G:C>A:T	4	.
chr10	58232031	.	C	G	.	clustered_events;normal_artifact	AS_FilterStatus=SITE;AS_SB_TABLE=213,683|3,18;DP=948;ECNT=11;GERMQ=93;MBQ=30,35;MFRL=155,147;MMQ=40,33;MPOS=29;NALOD=-1.149e+01;NLOD=83.98;POPAF=6.00;TLOD=17.02;ANN=G|upstream_gene_variant|MODIFIER|Gm10807|ENSMUSG00000057216|transcript|ENSMUST00000071408|processed_pseudogene||n.-3620G>C|||||3620|,G|downstream_gene_variant|MODIFIER|Gm4981|ENSMUSG00000075045|transcript|ENSMUST00000099726|protein_co…	GT:AD:AF:DP:F1R2:F2R1:SB	0/0:449,10:0.024:459:207,4:238,5:100,349,1,9	0/1:447,11:0.026:458:148,4:284,7:113,334,2,9	RY1114T6	chr10_58232031_C>G	449	10	447	11	upstream_gene_variant	MODIFIER	Gm10807	.	snv	C>G	G:C>C:G	4	.
chr10	58232038	.	C	T	.	clustered_events;map_qual;normal_artifact	AS_FilterStatus=map_qual;AS_SB_TABLE=166,625|2,11;DP=829;ECNT=11;GERMQ=93;MBQ=36,36;MFRL=156,162;MMQ=39,27;MPOS=19;NALOD=-7.418e+00;NLOD=80.62;POPAF=6.00;TLOD=6.84;ANN=T|upstream_gene_variant|MODIFIER|Gm10807|ENSMUSG00000057216|transcript|ENSMUST00000071408|processed_pseudogene||n.-3627G>A|||||3627|,T|downstream_gene_variant|MODIFIER|Gm4981|ENSMUSG00000075045|transcript|ENSMUST00000099726|protein…	GT:AD:AF:DP:F1R2:F2R1:SB	0/0:389,6:0.020:395:171,2:211,4:76,313,0,6	0/1:402,7:0.019:409:139,1:256,6:90,312,2,5	RY1114T6	chr10_58232038_C>T	389	6	402	7	upstream_gene_variant	MODIFIER	Gm10807	.	snv	C>T	G:C>A:T	4	.
chr10	58232043	.	T	A	.	clustered_events;map_qual;normal_artifact;strand_bias	AS_FilterStatus=map_qual,strand_bias;AS_SB_TABLE=129,569|0,11;DP=737;ECNT=11;GERMQ=93;MBQ=35,35;MFRL=158,158;MMQ=36,27;MPOS=31;NALOD=-3.123e+00;NLOD=76.43;POPAF=6.00;TLOD=6.26;ANN=A|upstream_gene_variant|MODIFIER|Gm10807|ENSMUSG00000057216|transcript|ENSMUST00000071408|processed_pseudogene||n.-3632A>T|||||3632|,A|downstream_gene_variant|MODIFIER|Gm4981|ENSMUSG00000075045|transcript|ENSMUST0000009…	GT:AD:AF:DP:F1R2:F2R1:SB	0/0:334,5:0.019:339:150,3:181,2:54,280,0,5	0/1:364,6:0.021:370:129,3:225,3:75,289,0,6	RY1114T6	chr10_58232043_T>A	334	5	364	6	upstream_gene_variant	MODIFIER	Gm10807	.	snv	T>A	A:T>T:A	2	.
chr10	58232055	.	C	A	.	clustered_events;map_qual;normal_artifact;strand_bias;weak_evidence	AS_FilterStatus=weak_evidence,map_qual,strand_bias;AS_SB_TABLE=104,458|0,7;DP=587;ECNT=11;GERMQ=93;MBQ=37,34;MFRL=162,165;MMQ=33,27;MPOS=22;NALOD=-7.384e+00;NLOD=57.50;POPAF=6.00;TLOD=4.58;ANN=A|upstream_gene_variant|MODIFIER|Gm10807|ENSMUSG00000057216|transcript|ENSMUST00000071408|processed_pseudogene||n.-3644G>T|||||3644|,A|downstream_gene_variant|MODIFIER|Gm4981|ENSMUSG00000075045|transcript|E…	GT:AD:AF:DP:F1R2:F2R1:SB	0/0:270,4:0.020:274:117,2:147,2:43,227,0,4	0/1:292,3:0.015:295:106,0:180,3:61,231,0,3	RY1114T6	chr10_58232055_C>A	270	4	292	3	upstream_gene_variant	MODIFIER	Gm10807	.	snv	C>A	G:C>T:A	4	.
chr10	58232104	.	G	T	.	clustered_events;haplotype;normal_artifact	AS_FilterStatus=SITE;AS_SB_TABLE=211,69|13,21;DP=322;ECNT=11;GERMQ=93;MBQ=36,35;MFRL=146,158;MMQ=27,33;MPOS=10;NALOD=-2.152e+01;NLOD=4.61;POPAF=6.00;TLOD=22.31;ANN=T|upstream_gene_variant|MODIFIER|Gm10807|ENSMUSG00000057216|transcript|ENSMUST00000071408|processed_pseudogene||n.-3693C>A|||||3693|,T|downstream_gene_variant|MODIFIER|Gm4981|ENSMUSG00000075045|transcript|ENSMUST00000099726|protein_cod…	GT:AD:AF:DP:F1R2:F2R1:PGT:PID:PS:SB	0|0:134,17:0.066:151:58,7:69,9:0|1:58232104_G_T:58232104:105,29,7,10	0|1:146,17:0.078:163:48,11:84,5:0|1:58232104_G_T:58232104:106,40,6,11	RY1114T6	chr10_58232104_G>T	134	17	146	17	upstream_gene_variant	MODIFIER	Gm10807	.	snv	G>T	G:C>T:A	3	.
chr10	58232112	.	A	G	.	clustered_events;haplotype;normal_artifact	AS_FilterStatus=SITE;AS_SB_TABLE=256,95|14,17;DP=382;ECNT=11;GERMQ=93;MBQ=35,32;MFRL=144,156;MMQ=27,33;MPOS=17;NALOD=-2.099e+01;NLOD=10.47;POPAF=6.00;TLOD=24.12;ANN=G|upstream_gene_variant|MODIFIER|Gm10807|ENSMUSG00000057216|transcript|ENSMUST00000071408|processed_pseudogene||n.-3701T>C|||||3701|,G|downstream_gene_variant|MODIFIER|Gm4981|ENSMUSG00000075045|transcript|ENSMUST00000099726|protein_co…	GT:AD:AF:DP:F1R2:F2R1:PGT:PID:PS:SB	0|0:169,14:0.058:183:69,6:92,5:0|1:58232104_G_T:58232104:129,40,7,7	0|1:182,17:0.073:199:61,10:108,5:0|1:58232104_G_T:58232104:127,55,7,10	RY1114T6	chr10_58232112_A>G	169	14	182	17	upstream_gene_variant	MODIFIER	Gm10807	.	snv	A>G	A:T>G:C	2	.
chr10	58232116	.	G	C	.	clustered_events;haplotype;normal_artifact	AS_FilterStatus=SITE;AS_SB_TABLE=290,94|14,14;DP=431;ECNT=11;GERMQ=93;MBQ=30,36;MFRL=144,156;MMQ=27,30;MPOS=19;NALOD=-2.069e+01;NLOD=13.99;POPAF=6.00;TLOD=23.64;ANN=C|upstream_gene_variant|MODIFIER|Gm10807|ENSMUSG00000057216|transcript|ENSMUST00000071408|processed_pseudogene||n.-3705C>G|||||3705|,C|downstream_gene_variant|MODIFIER|Gm4981|ENSMUSG00000075045|transcript|ENSMUST00000099726|protein_co…	GT:AD:AF:DP:F1R2:F2R1:PGT:PID:PS:SB	0|0:184,11:0.054:195:80,5:99,5:0|1:58232104_G_T:58232104:145,39,7,4	0|1:200,17:0.067:217:73,12:125,5:0|1:58232104_G_T:58232104:145,55,7,10	RY1114T6	chr10_58232116_G>C	184	11	200	17	upstream_gene_variant	MODIFIER	Gm10807	.	snv	G>C	G:C>C:G	2	.
chr10	58232128	.	G	A	.	clustered_events;map_qual;normal_artifact	AS_FilterStatus=map_qual;AS_SB_TABLE=346,132|17,4;DP=515;ECNT=11;GERMQ=93;MBQ=30,35;MFRL=144,140;MMQ=27,27;MPOS=18;NALOD=-7.206e+00;NLOD=40.66;POPAF=6.00;TLOD=9.73;ANN=A|upstream_gene_variant|MODIFIER|Gm10807|ENSMUSG00000057216|transcript|ENSMUST00000071408|processed_pseudogene||n.-3717C>T|||||3717|,A|downstream_gene_variant|MODIFIER|Gm4981|ENSMUSG00000075045|transcript|ENSMUST00000099726|protein…	GT:AD:AF:DP:F1R2:F2R1:SB	0/0:225,12:0.025:237:101,6:117,6:170,55,10,2	0/1:253,9:0.031:262:97,4:153,5:176,77,7,2	RY1114T6	chr10_58232128_G>A	225	12	253	9	upstream_gene_variant	MODIFIER	Gm10807	.	snv	G>A	G:C>A:T	4	.
chr10	58232173	.	C	G	.	clustered_events;normal_artifact	AS_FilterStatus=SITE;AS_SB_TABLE=521,371|29,27;DP=966;ECNT=11;GERMQ=93;MBQ=20,20;MFRL=142,144;MMQ=27,46;MPOS=26;NALOD=-4.083e+01;NLOD=19.85;POPAF=6.00;TLOD=34.68;ANN=G|upstream_gene_variant|MODIFIER|Gm10807|ENSMUSG00000057216|transcript|ENSMUST00000071408|processed_pseudogene||n.-3762G>C|||||3762|,G|downstream_gene_variant|MODIFIER|Gm4981|ENSMUSG00000075045|transcript|ENSMUST00000099726|protein_c…	GT:AD:AF:DP:F1R2:F2R1:SB	0/0:440,28:0.054:468:185,16:250,12:254,186,15,13	0/1:452,28:0.050:480:158,20:290,7:267,185,14,14	RY1114T6	chr10_58232173_C>G	440	28	452	28	upstream_gene_variant	MODIFIER	Gm10807	.	snv	C>G	G:C>C:G	4	.
chr10	58232225	.	A	T	.	clustered_events;map_qual;normal_artifact	AS_FilterStatus=map_qual;AS_SB_TABLE=234,459|7,16;DP=739;ECNT=11;GERMQ=93;MBQ=20,20;MFRL=144,142;MMQ=27,27;MPOS=30;NALOD=-1.323e+01;NLOD=47.85;POPAF=6.00;TLOD=13.98;ANN=T|upstream_gene_variant|MODIFIER|Gm10807|ENSMUSG00000057216|transcript|ENSMUST00000071408|processed_pseudogene||n.-3814T>A|||||3814|,T|downstream_gene_variant|MODIFIER|Gm4981|ENSMUSG00000075045|transcript|ENSMUST00000099726|protei…	GT:AD:AF:DP:F1R2:F2R1:SB	0/0:348,12:0.031:360:141,3:201,8:111,237,4,8	0/1:345,11:0.034:356:124,0:217,11:123,222,3,8	RY1114T6	chr10_58232225_A>T	348	12	345	11	upstream_gene_variant	MODIFIER	Gm10807	.	snv	A>T	A:T>T:A	4	.
chr10	58232274	.	G	A	.	map_qual;normal_artifact;strand_bias	AS_FilterStatus=map_qual,strand_bias;AS_SB_TABLE=23,214|0,10;DP=270;ECNT=1;GERMQ=93;MBQ=36,36;MFRL=160,192;MMQ=27,27;MPOS=30;NALOD=-4.012e+00;NLOD=18.87;POPAF=6.00;TLOD=7.19;ANN=A|upstream_gene_variant|MODIFIER|Gm10807|ENSMUSG00000057216|transcript|ENSMUST00000071408|processed_pseudogene||n.-3863C>T|||||3863|,A|downstream_gene_variant|MODIFIER|Gm4981|ENSMUSG00000075045|transcript|ENSMUST000000997…	GT:AD:AF:DP:F1R2:F2R1:SB	0/0:107,4:0.046:111:44,3:63,1:11,96,0,4	0/1:130,6:0.052:136:48,3:82,3:12,118,0,6	RY1114T6	chr10_58232274_G>A	107	4	130	6	upstream_gene_variant	MODIFIER	Gm10807	.	snv	G>A	G:C>A:T	4	.
chr10	58232401	.	G	A	.	clustered_events;map_qual;normal_artifact;strand_bias;weak_evidence	AS_FilterStatus=weak_evidence,map_qual,strand_bias;AS_SB_TABLE=209,18|6,0;DP=234;ECNT=10;GERMQ=93;MBQ=30,36;MFRL=162,175;MMQ=27,27;MPOS=27;NALOD=-9.134e+00;NLOD=16.01;POPAF=6.00;TLOD=3.14;ANN=A|upstream_gene_variant|MODIFIER|Gm10807|ENSMUSG00000057216|transcript|ENSMUST00000071408|processed_pseudogene||n.-3990C>T|||||3990|,A|downstream_gene_variant|MODIFIER|Gm4981|ENSMUSG00000075045|transcript|EN…	GT:AD:AF:DP:F1R2:F2R1:SB	0/0:113,4:0.043:117:44,1:57,3:108,5,4,0	0/1:114,2:0.027:116:46,1:59,1:101,13,2,0	RY1114T6	chr10_58232401_G>A	113	4	114	2	upstream_gene_variant	MODIFIER	Gm10807	.	snv	G>A	G:C>A:T	2	.
chr10	58232470	.	C	A	.	clustered_events;map_qual;normal_artifact	AS_FilterStatus=map_qual;AS_SB_TABLE=780,376|22,7;DP=1227;ECNT=10;GERMQ=93;MBQ=20,35;MFRL=146,156;MMQ=27,27;MPOS=29;NALOD=-2.135e+01;NLOD=95.64;POPAF=6.00;TLOD=12.06;ANN=A|upstream_gene_variant|MODIFIER|Gm10807|ENSMUSG00000057216|transcript|ENSMUST00000071408|processed_pseudogene||n.-4059G>T|||||4059|,A|downstream_gene_variant|MODIFIER|Gm4981|ENSMUSG00000075045|transcript|ENSMUST00000099726|prote…	GT:AD:AF:DP:F1R2:F2R1:SB	0/0:627,19:0.018:646:240,6:384,12:414,213,14,5	0/1:529,10:0.018:539:195,5:326,4:366,163,8,2	RY1114T6	chr10_58232470_C>A	627	19	529	10	upstream_gene_variant	MODIFIER	Gm10807	.	snv	C>A	G:C>T:A	2	.
chr10	58232486	.	C	T	.	clustered_events;haplotype;map_qual;normal_artifact	AS_FilterStatus=map_qual;AS_SB_TABLE=889,531|20,9;DP=1457;ECNT=10;GERMQ=93;MBQ=20,33;MFRL=144,156;MMQ=39,27;MPOS=30;NALOD=-3.278e+01;NLOD=110.16;POPAF=6.00;TLOD=16.27;ANN=T|upstream_gene_variant|MODIFIER|Gm10807|ENSMUSG00000057216|transcript|ENSMUST00000071408|processed_pseudogene||n.-4075G>A|||||4075|,T|downstream_gene_variant|MODIFIER|Gm4981|ENSMUSG00000075045|transcript|ENSMUST00000099726|prot…	GT:AD:AF:DP:F1R2:F2R1:PGT:PID:PS:SB	0|0:766,19:0.015:785:282,6:461,13:0|1:58232486_C_T:58232486:473,293,13,6	0|1:654,10:0.013:664:237,4:395,6:0|1:58232486_C_T:58232486:416,238,7,3	RY1114T6	chr10_58232486_C>T	766	19	654	10	upstream_gene_variant	MODIFIER	Gm10807	.	snv	C>T	G:C>A:T	4	.
chr10	58232488	.	C	T	.	clustered_events;normal_artifact	AS_FilterStatus=SITE;AS_SB_TABLE=830,503|69,36;DP=1506;ECNT=10;GERMQ=93;MBQ=20,20;MFRL=144,146;MMQ=39,33;MPOS=31;NALOD=-7.376e+01;NLOD=36.57;POPAF=6.00;TLOD=118.92;ANN=T|upstream_gene_variant|MODIFIER|Gm10807|ENSMUSG00000057216|transcript|ENSMUST00000071408|processed_pseudogene||n.-4077G>A|||||4077|,T|downstream_gene_variant|MODIFIER|Gm4981|ENSMUSG00000075045|transcript|ENSMUST00000099726|protein…	GT:AD:AF:DP:F1R2:F2R1:SB	0/0:737,41:0.056:778:284,12:448,29:453,284,27,14	0/1:596,64:0.100:660:219,29:372,35:377,219,42,22	RY1114T6	chr10_58232488_C>T	737	41	596	64	upstream_gene_variant	MODIFIER	Gm10807	.	snv	C>T	G:C>A:T	4	.
chr10	58232489	.	G	A	.	clustered_events;haplotype;map_qual;normal_artifact	AS_FilterStatus=map_qual;AS_SB_TABLE=926,558|20,9;DP=1514;ECNT=10;GERMQ=93;MBQ=20,29;MFRL=144,156;MMQ=39,27;MPOS=31;NALOD=-3.264e+01;NLOD=116.78;POPAF=6.00;TLOD=16.18;ANN=A|upstream_gene_variant|MODIFIER|Gm10807|ENSMUSG00000057216|transcript|ENSMUST00000071408|processed_pseudogene||n.-4078C>T|||||4078|,A|downstream_gene_variant|MODIFIER|Gm4981|ENSMUSG00000075045|transcript|ENSMUST00000099726|prot…	GT:AD:AF:DP:F1R2:F2R1:PGT:PID:PS:SB	0|0:803,19:0.014:822:292,6:477,13:0|1:58232486_C_T:58232486:494,309,13,6	0|1:681,10:0.013:691:248,4:407,6:0|1:58232486_C_T:58232486:432,249,7,3	RY1114T6	chr10_58232489_G>A	803	19	681	10	upstream_gene_variant	MODIFIER	Gm10807	.	snv	G>A	G:C>A:T	4	.
chr10	58232495	.	G	A	.	clustered_events;haplotype;map_qual;normal_artifact	AS_FilterStatus=map_qual;AS_SB_TABLE=916,598|20,9;DP=1567;ECNT=10;GERMQ=93;MBQ=20,33;MFRL=144,156;MMQ=45,27;MPOS=29;NALOD=-3.255e+01;NLOD=120.39;POPAF=6.00;TLOD=16.13;ANN=A|upstream_gene_variant|MODIFIER|Gm10807|ENSMUSG00000057216|transcript|ENSMUST00000071408|processed_pseudogene||n.-4084C>T|||||4084|,A|downstream_gene_variant|MODIFIER|Gm4981|ENSMUSG00000075045|transcript|ENSMUST00000099726|prot…	GT:AD:AF:DP:F1R2:F2R1:PGT:PID:PS:SB	0|0:823,19:0.014:842:312,6:495,13:0|1:58232486_C_T:58232486:494,329,13,6	0|1:691,10:0.012:701:249,4:425,6:0|1:58232486_C_T:58232486:422,269,7,3	RY1114T6	chr10_58232495_G>A	823	19	691	10	upstream_gene_variant	MODIFIER	Gm10807	.	snv	G>A	G:C>A:T	4	.
chr10	58232594	.	A	C	.	clustered_events;map_qual;normal_artifact	AS_FilterStatus=map_qual;AS_SB_TABLE=88,524|4,18;DP=662;ECNT=10;GERMQ=93;MBQ=36,30;MFRL=156,167;MMQ=27,27;MPOS=18;NALOD=-1.437e+01;NLOD=55.62;POPAF=6.00;TLOD=13.18;ANN=C|upstream_gene_variant|MODIFIER|Gm10807|ENSMUSG00000057216|transcript|ENSMUST00000071408|processed_pseudogene||n.-4183T>G|||||4183|,C|downstream_gene_variant|MODIFIER|Gm4981|ENSMUSG00000075045|transcript|ENSMUST00000099726|protein…	GT:AD:AF:DP:F1R2:F2R1:SB	0/0:329,11:0.033:340:158,4:171,7:45,284,2,9	0/1:283,11:0.041:294:108,8:172,3:43,240,2,9	RY1114T6	chr10_58232594_A>C	329	11	283	11	upstream_gene_variant	MODIFIER	Gm10807	.	snv	A>C	A:T>C:G	4	.
chr10	58232607	.	CA	TG	.	clustered_events;map_qual;normal_artifact	AS_FilterStatus=map_qual;AS_SB_TABLE=32,415|2,14;DP=489;ECNT=10;GERMQ=93;MBQ=30,37;MFRL=161,158;MMQ=27,27;MPOS=12;NALOD=-7.723e+00;NLOD=49.13;POPAF=6.00;TLOD=16.50;ANN=TG|upstream_gene_variant|MODIFIER|Gm10807|ENSMUSG00000057216|transcript|ENSMUST00000071408|processed_pseudogene||n.-4197_-4196delTGinsCA|||||4196|,TG|downstream_gene_variant|MODIFIER|Gm4981|ENSMUSG00000075045|transcript|ENSMUST0000…	GT:AD:AF:DP:F1R2:F2R1:SB	0/0:241,6:0.026:247:114,1:124,5:19,222,1,5	0/1:206,10:0.047:216:75,6:126,4:13,193,1,9	RY1114T6	chr10_58232607_CA>TG	241	6	206	10	upstream_gene_variant	MODIFIER	Gm10807	.	indel	.	.	3	.
chr10	58232617	.	C	T	.	clustered_events;map_qual;normal_artifact;strand_bias	AS_FilterStatus=map_qual,strand_bias;AS_SB_TABLE=9,303|0,17;DP=358;ECNT=10;GERMQ=93;MBQ=31,36;MFRL=165,168;MMQ=27,27;MPOS=15;NALOD=-1.624e+01;NLOD=12.65;POPAF=6.00;TLOD=5.79;ANN=T|upstream_gene_variant|MODIFIER|Gm10807|ENSMUSG00000057216|transcript|ENSMUST00000071408|processed_pseudogene||n.-4206G>A|||||4206|,T|downstream_gene_variant|MODIFIER|Gm4981|ENSMUSG00000075045|transcript|ENSMUST000000997…	GT:AD:AF:DP:F1R2:F2R1:SB	0/0:152,11:0.074:163:72,5:77,6:1,151,0,11	0/1:160,6:0.037:166:60,3:95,2:8,152,0,6	RY1114T6	chr10_58232617_C>T	152	11	160	6	upstream_gene_variant	MODIFIER	Gm10807	.	snv	C>T	G:C>A:T	4	.
chr10	58233491	.	C	A	.	weak_evidence	AS_FilterStatus=weak_evidence;AS_SB_TABLE=10,2|1,1;DP=14;ECNT=2;GERMQ=20;MBQ=36,20;MFRL=182,180;MMQ=29,45;MPOS=15;NALOD=0.954;NLOD=2.41;POPAF=6.00;TLOD=3.39;ANN=A|upstream_gene_variant|MODIFIER|4933403O03Rik|ENSMUSG00000075046|transcript|ENSMUST00000176875|processed_pseudogene||n.-818G>T|||||818|,A|downstream_gene_variant|MODIFIER|Gm4981|ENSMUSG00000075045|transcript|ENSMUST00000099726|protein_co…	GT:AD:AF:DP:F1R2:F2R1:SB	0/0:8,0:0.100:8:2,0:6,0:8,0,0,0	0/1:4,2:0.286:6:3,0:1,2:2,2,1,1	RY1114T6	chr10_58233491_C>A	8	0	4	2	upstream_gene_variant	MODIFIER	4933403O03Rik	.	snv	C>A	G:C>T:A	1	.
chr10	58233550	.	G	A	.	strand_bias;weak_evidence	AS_FilterStatus=weak_evidence,strand_bias;AS_SB_TABLE=19,11|0,1;DP=31;ECNT=2;GERMQ=61;MBQ=28,38;MFRL=158,180;MMQ=40,50;MPOS=25;NALOD=1.04;NLOD=5.88;POPAF=6.00;TLOD=3.01;ANN=A|upstream_gene_variant|MODIFIER|4933403O03Rik|ENSMUSG00000075046|transcript|ENSMUST00000176875|processed_pseudogene||n.-877C>T|||||877|,A|downstream_gene_variant|MODIFIER|Gm4981|ENSMUSG00000075045|transcript|ENSMUST0000009972…	GT:AD:AF:DP:F1R2:F2R1:SB	0/0:26,0:0.046:26:10,0:16,0:16,10,0,0	0/1:4,1:0.286:5:4,0:0,1:3,1,0,1	RY1114T6	chr10_58233550_G>A	26	0	4	1	upstream_gene_variant	MODIFIER	4933403O03Rik	.	snv	G>A	G:C>A:T	1	.
chr10	58239459	.	A	G	.	clustered_events;map_qual;normal_artifact;weak_evidence	AS_FilterStatus=weak_evidence,map_qual;AS_SB_TABLE=139,27|3,1;DP=177;ECNT=5;GERMQ=93;MBQ=33,29;MFRL=169,130;MMQ=25,25;MPOS=14;NALOD=0.651;NLOD=16.58;POPAF=6.00;TLOD=3.79;ANN=G|upstream_gene_variant|MODIFIER|Gm4981|ENSMUSG00000075045|transcript|ENSMUST00000099726|protein_coding||c.-3069T>C|||||2799|,G|downstream_gene_variant|MODIFIER|Gm19459|ENSMUSG00000093601|transcript|ENSMUST00000176240|unproce…	GT:AD:AF:DP:F1R2:F2R1:SB	0/0:76,1:0.029:77:46,1:28,0:63,13,1,0	0/1:90,3:0.036:93:44,2:46,1:76,14,2,1	RY1114T6	chr10_58239459_A>G	76	1	90	3	upstream_gene_variant	MODIFIER	Gm4981	.	snv	A>G	A:T>G:C	4	.
chr10	58239462	.	G	A	.	clustered_events;haplotype;map_qual;normal_artifact	AS_FilterStatus=map_qual;AS_SB_TABLE=159,31|3,1;DP=194;ECNT=5;GERMQ=93;MBQ=30,28;MFRL=167,185;MMQ=25,25;MPOS=12;NALOD=-7.334e-01;NLOD=18.38;POPAF=6.00;TLOD=7.94;ANN=A|upstream_gene_variant|MODIFIER|Gm4981|ENSMUSG00000075045|transcript|ENSMUST00000099726|protein_coding||c.-3072C>T|||||2802|,A|downstream_gene_variant|MODIFIER|Gm19459|ENSMUSG00000093601|transcript|ENSMUST00000176240|unprocessed_pseu…	GT:AD:AF:DP:F1R2:F2R1:PGT:PID:PS:SB	0|0:89,1:0.026:90:52,0:32,1:0|1:58239462_G_A:58239462:74,15,1,0	0|1:101,3:0.033:104:50,0:46,3:0|1:58239462_G_A:58239462:85,16,2,1	RY1114T6	chr10_58239462_G>A	89	1	101	3	upstream_gene_variant	MODIFIER	Gm4981	.	snv	G>A	G:C>A:T	4	.
chr10	58239469	.	C	T	.	clustered_events;haplotype;map_qual;normal_artifact	AS_FilterStatus=map_qual;AS_SB_TABLE=182,39|3,1;DP=231;ECNT=5;GERMQ=93;MBQ=35,29;MFRL=166,185;MMQ=25,25;MPOS=14;NALOD=-6.399e-01;NLOD=20.78;POPAF=6.00;TLOD=7.72;ANN=T|upstream_gene_variant|MODIFIER|Gm4981|ENSMUSG00000075045|transcript|ENSMUST00000099726|protein_coding||c.-3079G>A|||||2809|,T|downstream_gene_variant|MODIFIER|Gm19459|ENSMUSG00000093601|transcript|ENSMUST00000176240|unprocessed_pseu…	GT:AD:AF:DP:F1R2:F2R1:PGT:PID:PS:SB	0|0:100,1:0.023:101:59,0:39,1:0|1:58239462_G_A:58239462:81,19,1,0	0|1:121,3:0.028:124:55,0:65,3:0|1:58239462_G_A:58239462:101,20,2,1	RY1114T6	chr10_58239469_C>T	100	1	121	3	upstream_gene_variant	MODIFIER	Gm4981	.	snv	C>T	G:C>A:T	4	.
chr10	58239485	.	T	C	.	clustered_events;map_qual;normal_artifact	AS_FilterStatus=map_qual;AS_SB_TABLE=246,63|16,4;DP=346;ECNT=5;GERMQ=93;MBQ=34,35;MFRL=163,168;MMQ=25,25;MPOS=23;NALOD=-7.166e+00;NLOD=19.71;POPAF=6.00;TLOD=26.01;ANN=C|upstream_gene_variant|MODIFIER|Gm4981|ENSMUSG00000075045|transcript|ENSMUST00000099726|protein_coding||c.-3095A>G|||||2825|,C|downstream_gene_variant|MODIFIER|Gm19459|ENSMUSG00000093601|transcript|ENSMUST00000176240|unprocessed_ps…	GT:AD:AF:DP:F1R2:F2R1:SB	0/0:148,6:0.047:154:81,5:67,1:116,32,5,1	0/1:161,14:0.085:175:68,6:93,8:130,31,11,3	RY1114T6	chr10_58239485_T>C	148	6	161	14	upstream_gene_variant	MODIFIER	Gm4981	.	snv	T>C	A:T>G:C	2	.
chr10	58239491	.	G	T	.	clustered_events;map_qual;normal_artifact;weak_evidence	AS_FilterStatus=weak_evidence,map_qual;AS_SB_TABLE=293,73|9,2;DP=393;ECNT=5;GERMQ=93;MBQ=36,32;MFRL=163,168;MMQ=25,25;MPOS=21;NALOD=-7.365e+00;NLOD=25.41;POPAF=6.00;TLOD=3.39;ANN=T|upstream_gene_variant|MODIFIER|Gm4981|ENSMUSG00000075045|transcript|ENSMUST00000099726|protein_coding||c.-3101C>A|||||2831|,T|downstream_gene_variant|MODIFIER|Gm19459|ENSMUSG00000093601|transcript|ENSMUST00000176240|un…	GT:AD:AF:DP:F1R2:F2R1:SB	0/0:166,6:0.035:172:89,3:77,3:133,33,4,2	0/1:200,5:0.033:205:82,3:117,2:160,40,5,0	RY1114T6	chr10_58239491_G>T	166	6	200	5	upstream_gene_variant	MODIFIER	Gm4981	.	snv	G>T	G:C>T:A	3	.
chr10	58239575	.	G	A	.	clustered_events;map_qual;normal_artifact	AS_FilterStatus=map_qual;AS_SB_TABLE=395,379|13,10;DP=834;ECNT=6;GERMQ=93;MBQ=20,20;MFRL=158,168;MMQ=25,25;MPOS=26;NALOD=-1.588e+01;NLOD=44.30;POPAF=6.00;TLOD=11.93;ANN=A|upstream_gene_variant|MODIFIER|Gm4981|ENSMUSG00000075045|transcript|ENSMUST00000099726|protein_coding||c.-3185C>T|||||2915|,A|downstream_gene_variant|MODIFIER|Gm19459|ENSMUSG00000093601|transcript|ENSMUST00000176240|unprocessed_…	GT:AD:AF:DP:F1R2:F2R1:SB	0/0:356,12:0.037:368:172,8:179,4:185,171,8,4	0/1:418,11:0.029:429:174,6:240,5:210,208,5,6	RY1114T6	chr10_58239575_G>A	356	12	418	11	upstream_gene_variant	MODIFIER	Gm4981	.	snv	G>A	G:C>A:T	4	.
chr10	58239625	.	G	C	.	clustered_events;map_qual;normal_artifact;strand_bias;weak_evidence	AS_FilterStatus=weak_evidence,map_qual,strand_bias;AS_SB_TABLE=108,413|0,10;DP=556;ECNT=6;GERMQ=93;MBQ=37,38;MFRL=162,173;MMQ=25,25;MPOS=24;NALOD=-2.739e+00;NLOD=56.08;POPAF=6.00;TLOD=5.43;ANN=C|upstream_gene_variant|MODIFIER|Gm4981|ENSMUSG00000075045|transcript|ENSMUST00000099726|protein_coding||c.-3235C>G|||||2965|,C|non_coding_transcript_exon_variant|MODIFIER|Gm19459|ENSMUSG00000093601|transcr…	GT:AD:AF:DP:F1R2:F2R1:SB	0/0:259,4:0.021:263:130,2:129,2:62,197,0,4	0/1:262,6:0.028:268:102,1:160,5:46,216,0,6	RY1114T6	chr10_58239625_G>C	259	4	262	6	upstream_gene_variant	MODIFIER	Gm4981	.	snv	G>C	G:C>C:G	3	.
chr10	58239642	.	G	T	.	clustered_events;map_qual;normal_artifact;strand_bias	AS_FilterStatus=map_qual,strand_bias;AS_SB_TABLE=89,362|0,16;DP=487;ECNT=6;GERMQ=93;MBQ=36,37;MFRL=166,155;MMQ=25,25;MPOS=23;NALOD=-4.651e+00;NLOD=45.90;POPAF=6.00;TLOD=21.17;ANN=T|upstream_gene_variant|MODIFIER|Gm4981|ENSMUSG00000075045|transcript|ENSMUST00000099726|protein_coding||c.-3252C>A|||||2982|,T|non_coding_transcript_exon_variant|MODIFIER|Gm19459|ENSMUSG00000093601|transcript|ENSMUST000…	GT:AD:AF:DP:F1R2:F2R1:SB	0/0:235,5:0.028:240:121,2:113,3:53,182,0,5	0/1:216,11:0.057:227:85,2:131,9:36,180,0,11	RY1114T6	chr10_58239642_G>T	235	5	216	11	upstream_gene_variant	MODIFIER	Gm4981	.	snv	G>T	G:C>T:A	4	.
chr10	58239655	.	G	A	.	clustered_events;map_qual;normal_artifact;strand_bias	AS_FilterStatus=map_qual,strand_bias;AS_SB_TABLE=75,321|0,11;DP=423;ECNT=6;GERMQ=93;MBQ=36,35;MFRL=171,185;MMQ=25,25;MPOS=15;NALOD=-4.978e+00;NLOD=38.55;POPAF=6.00;TLOD=11.14;ANN=A|upstream_gene_variant|MODIFIER|Gm4981|ENSMUSG00000075045|transcript|ENSMUST00000099726|protein_coding||c.-3265C>T|||||2995|,A|non_coding_transcript_exon_variant|MODIFIER|Gm19459|ENSMUSG00000093601|transcript|ENSMUST000…	GT:AD:AF:DP:F1R2:F2R1:SB	0/0:210,5:0.032:215:109,2:99,3:46,164,0,5	0/1:186,6:0.039:192:73,1:109,5:29,157,0,6	RY1114T6	chr10_58239655_G>A	210	5	186	6	upstream_gene_variant	MODIFIER	Gm4981	.	snv	G>A	G:C>A:T	4	.
chr10	58239673	.	T	A	.	clustered_events;map_qual;normal_artifact;strand_bias	AS_FilterStatus=map_qual,strand_bias;AS_SB_TABLE=56,233|0,5;DP=314;ECNT=6;GERMQ=93;MBQ=34,36;MFRL=177,196;MMQ=25,25;MPOS=4;NALOD=-2.213e-01;NLOD=35.51;POPAF=6.00;TLOD=8.94;ANN=A|upstream_gene_variant|MODIFIER|Gm4981|ENSMUSG00000075045|transcript|ENSMUST00000099726|protein_coding||c.-3283A>T|||||3013|,A|non_coding_transcript_exon_variant|MODIFIER|Gm19459|ENSMUSG00000093601|transcript|ENSMUST000001…	GT:AD:AF:DP:F1R2:F2R1:SB	0/0:158,1:0.015:159:87,1:70,0:34,124,0,1	0/1:131,4:0.040:135:54,0:73,4:22,109,0,4	RY1114T6	chr10_58239673_T>A	158	1	131	4	upstream_gene_variant	MODIFIER	Gm4981	.	snv	T>A	A:T>T:A	4	.
chr10	58239684	.	G	A	.	clustered_events;map_qual;normal_artifact;strand_bias	AS_FilterStatus=map_qual,strand_bias;AS_SB_TABLE=37,173|0,6;DP=233;ECNT=6;GERMQ=93;MBQ=35,35;MFRL=186,187;MMQ=25,25;MPOS=4;NALOD=-3.250e+00;NLOD=20.76;POPAF=6.00;TLOD=5.24;ANN=A|upstream_gene_variant|MODIFIER|Gm4981|ENSMUSG00000075045|transcript|ENSMUST00000099726|protein_coding||c.-3294C>T|||||3024|,A|non_coding_transcript_exon_variant|MODIFIER|Gm19459|ENSMUSG00000093601|transcript|ENSMUST000001…	GT:AD:AF:DP:F1R2:F2R1:SB	0/0:116,3:0.037:119:63,2:53,1:22,94,0,3	0/1:94,3:0.043:97:41,2:53,1:15,79,0,3	RY1114T6	chr10_58239684_G>A	116	3	94	3	upstream_gene_variant	MODIFIER	Gm4981	.	snv	G>A	G:C>A:T	2	.
chr10	58455305	.	TA	CG	.	clustered_events;haplotype;normal_artifact;weak_evidence	AS_FilterStatus=weak_evidence;AS_SB_TABLE=106,110|1,2;DP=225;ECNT=6;GERMQ=93;MBQ=20,30;MFRL=148,117;MMQ=60,60;MPOS=22;NALOD=-6.758e-01;NLOD=19.88;POPAF=6.00;TLOD=5.18;ANN=CG|missense_variant|MODERATE|Ranbp2|ENSMUSG00000003226|transcript|ENSMUST00000003310|protein_coding|5/29|c.492_493delTAinsCG|p.Ile165Val|620/9477|492/9162|164/3053||	GT:AD:AF:DP:F1R2:F2R1:PGT:PID:PS:SB	0|0:110,1:0.024:111:52,1:53,0:0|1:58455305_TA_CG:58455305:57,53,0,1	0|1:106,2:0.024:108:38,0:67,2:0|1:58455305_TA_CG:58455305:49,57,1,1	RY1114T6	chr10_58455305_TA>CG	110	1	106	2	missense_variant	MODERATE	Ranbp2	.	indel	.	.	1	.
chr10	58455308	.	T	C	.	clustered_events;haplotype;normal_artifact;weak_evidence	AS_FilterStatus=weak_evidence;AS_SB_TABLE=106,110|1,2;DP=219;ECNT=6;GERMQ=93;MBQ=23,32;MFRL=148,117;MMQ=60,60;MPOS=19;NALOD=-6.784e-01;NLOD=19.88;POPAF=6.00;TLOD=5.18;ANN=C|synonymous_variant|LOW|Ranbp2|ENSMUSG00000003226|transcript|ENSMUST00000003310|protein_coding|5/29|c.495T>C|p.Ile165Ile|623/9477|495/9162|165/3053||	GT:AD:AF:DP:F1R2:F2R1:PGT:PID:PS:SB	0|0:108,1:0.024:109:54,1:48,0:0|1:58455305_TA_CG:58455305:57,51,0,1	0|1:108,2:0.024:110:38,0:65,2:0|1:58455305_TA_CG:58455305:49,59,1,1	RY1114T6	chr10_58455308_T>C	108	1	108	2	synonymous_variant	LOW	Ranbp2	.	snv	T>C	A:T>G:C	1	.
chr10	58455314	.	A	G	.	clustered_events;haplotype;normal_artifact;weak_evidence	AS_FilterStatus=weak_evidence;AS_SB_TABLE=102,113|1,2;DP=218;ECNT=6;GERMQ=93;MBQ=24,38;MFRL=148,117;MMQ=60,60;MPOS=19;NALOD=-7.000e-01;NLOD=19.28;POPAF=6.00;TLOD=5.15;ANN=G|synonymous_variant|LOW|Ranbp2|ENSMUSG00000003226|transcript|ENSMUST00000003310|protein_coding|5/29|c.501A>G|p.Val167Val|629/9477|501/9162|167/3053||	GT:AD:AF:DP:F1R2:F2R1:PGT:PID:PS:SB	0|0:108,1:0.025:109:54,1:45,0:0|1:58455305_TA_CG:58455305:56,52,0,1	0|1:107,2:0.023:109:37,0:65,2:0|1:58455305_TA_CG:58455305:46,61,1,1	RY1114T6	chr10_58455314_A>G	108	1	107	2	synonymous_variant	LOW	Ranbp2	.	snv	A>G	A:T>G:C	1	.
chr10	58455317	.	T	C	.	clustered_events;haplotype;normal_artifact;weak_evidence	AS_FilterStatus=weak_evidence;AS_SB_TABLE=99,110|1,2;DP=212;ECNT=6;GERMQ=93;MBQ=32,36;MFRL=148,117;MMQ=60,60;MPOS=22;NALOD=-7.334e-01;NLOD=18.38;POPAF=6.00;TLOD=5.16;ANN=C|synonymous_variant|LOW|Ranbp2|ENSMUSG00000003226|transcript|ENSMUST00000003310|protein_coding|5/29|c.504T>C|p.Asn168Asn|632/9477|504/9162|168/3053||	GT:AD:AF:DP:F1R2:F2R1:PGT:PID:PS:SB	0|0:103,1:0.026:104:53,1:48,0:0|1:58455305_TA_CG:58455305:55,48,0,1	0|1:106,2:0.024:108:38,0:62,2:0|1:58455305_TA_CG:58455305:44,62,1,1	RY1114T6	chr10_58455317_T>C	103	1	106	2	synonymous_variant	LOW	Ranbp2	.	snv	T>C	A:T>G:C	1	.
chr10	58455323	.	A	G	.	clustered_events;haplotype;normal_artifact;weak_evidence	AS_FilterStatus=weak_evidence;AS_SB_TABLE=96,107|1,2;DP=206;ECNT=6;GERMQ=93;MBQ=33,35;MFRL=151,117;MMQ=60,60;MPOS=28;NALOD=-7.681e-01;NLOD=17.47;POPAF=6.00;TLOD=5.12;ANN=G|synonymous_variant|LOW|Ranbp2|ENSMUSG00000003226|transcript|ENSMUST00000003310|protein_coding|5/29|c.510A>G|p.Arg170Arg|638/9477|510/9162|170/3053||	GT:AD:AF:DP:F1R2:F2R1:PGT:PID:PS:SB	0|0:98,1:0.027:99:51,1:43,0:0|1:58455305_TA_CG:58455305:53,45,0,1	0|1:105,2:0.022:107:38,0:65,2:0|1:58455305_TA_CG:58455305:43,62,1,1	RY1114T6	chr10_58455323_A>G	98	1	105	2	synonymous_variant	LOW	Ranbp2	.	snv	A>G	A:T>G:C	1	.
chr10	58455329	.	A	G	.	clustered_events;haplotype;normal_artifact;weak_evidence	AS_FilterStatus=weak_evidence;AS_SB_TABLE=97,105|1,2;DP=205;ECNT=6;GERMQ=93;MBQ=33,38;MFRL=151,117;MMQ=60,60;MPOS=42;NALOD=-7.448e-01;NLOD=18.08;POPAF=6.00;TLOD=5.16;ANN=G|synonymous_variant|LOW|Ranbp2|ENSMUSG00000003226|transcript|ENSMUST00000003310|protein_coding|5/29|c.516A>G|p.Val172Val|644/9477|516/9162|172/3053||	GT:AD:AF:DP:F1R2:F2R1:PGT:PID:PS:SB	0|0:101,1:0.026:102:52,0:43,0:0|1:58455305_TA_CG:58455305:54,47,0,1	0|1:101,2:0.024:103:36,0:62,2:0|1:58455305_TA_CG:58455305:43,58,1,1	RY1114T6	chr10_58455329_A>G	101	1	101	2	synonymous_variant	LOW	Ranbp2	.	snv	A>G	A:T>G:C	1	.
chr10	58479115	.	A	G	.	clustered_events;normal_artifact;weak_evidence	AS_FilterStatus=weak_evidence;AS_SB_TABLE=63,73|3,2;DP=144;ECNT=7;GERMQ=93;MBQ=34,20;MFRL=151,130;MMQ=60,60;MPOS=10;NALOD=-5.802e+00;NLOD=2.74;POPAF=6.00;TLOD=3.39;ANN=G|missense_variant|MODERATE|Ranbp2|ENSMUSG00000003226|transcript|ENSMUST00000003310|protein_coding|20/29|c.5656A>G|p.Ile1886Val|5784/9477|5656/9162|1886/3053||	GT:AD:AF:DP:F1R2:F2R1:SB	0/0:47,2:0.049:49:14,0:33,2:24,23,1,1	0/1:89,3:0.038:92:28,1:60,2:39,50,2,1	RY1114T6	chr10_58479115_A>G	47	2	89	3	missense_variant	MODERATE	Ranbp2	.	snv	A>G	A:T>G:C	1	.
chr10	58479138	.	T	C	.	clustered_events;haplotype;normal_artifact	AS_FilterStatus=SITE;AS_SB_TABLE=79,65|2,3;DP=153;ECNT=7;GERMQ=93;MBQ=32,20;MFRL=152,130;MMQ=60,60;MPOS=31;NALOD=-5.679e+00;NLOD=4.55;POPAF=6.00;TLOD=8.17;ANN=C|synonymous_variant|LOW|Ranbp2|ENSMUSG00000003226|transcript|ENSMUST00000003310|protein_coding|20/29|c.5679T>C|p.Gly1893Gly|5807/9477|5679/9162|1893/3053||	GT:AD:AF:DP:F1R2:F2R1:PGT:PID:PS:SB	0|0:55,2:0.042:57:14,0:34,2:0|1:58479138_T_C:58479138:32,23,1,1	0|1:89,3:0.039:92:35,1:46,2:0|1:58479138_T_C:58479138:47,42,1,2	RY1114T6	chr10_58479138_T>C	55	2	89	3	synonymous_variant	LOW	Ranbp2	.	snv	T>C	A:T>G:C	2	.
chr10	58479147	.	T	C	.	clustered_events;haplotype;normal_artifact	AS_FilterStatus=SITE;AS_SB_TABLE=86,55|2,3;DP=147;ECNT=7;GERMQ=93;MBQ=33,20;MFRL=152,130;MMQ=60,60;MPOS=32;NALOD=-5.629e+00;NLOD=5.45;POPAF=6.00;TLOD=8.28;ANN=C|synonymous_variant|LOW|Ranbp2|ENSMUSG00000003226|transcript|ENSMUST00000003310|protein_coding|20/29|c.5688T>C|p.Asn1896Asn|5816/9477|5688/9162|1896/3053||	GT:AD:AF:DP:F1R2:F2R1:PGT:PID:PS:SB	0|0:59,2:0.040:61:14,0:45,2:0|1:58479138_T_C:58479138:40,19,1,1	0|1:82,3:0.042:85:31,1:45,2:0|1:58479138_T_C:58479138:46,36,1,2	RY1114T6	chr10_58479147_T>C	59	2	82	3	synonymous_variant	LOW	Ranbp2	.	snv	T>C	A:T>G:C	2	.
chr10	58479165	.	T	C	.	clustered_events;haplotype;normal_artifact	AS_FilterStatus=SITE;AS_SB_TABLE=99,65|2,3;DP=169;ECNT=7;GERMQ=93;MBQ=20,20;MFRL=150,130;MMQ=60,60;MPOS=42;NALOD=-5.394e+00;NLOD=9.96;POPAF=6.00;TLOD=8.40;ANN=C|synonymous_variant|LOW|Ranbp2|ENSMUSG00000003226|transcript|ENSMUST00000003310|protein_coding|20/29|c.5706T>C|p.Asn1902Asn|5834/9477|5706/9162|1902/3053||	GT:AD:AF:DP:F1R2:F2R1:PGT:PID:PS:SB	0|0:86,2:0.031:88:20,0:64,2:0|1:58479165_T_C:58479165:56,30,1,1	0|1:78,3:0.046:81:31,1:44,2:0|1:58479165_T_C:58479165:43,35,1,2	RY1114T6	chr10_58479165_T>C	86	2	78	3	synonymous_variant	LOW	Ranbp2	.	snv	T>C	A:T>G:C	1	.
chr10	58479168	.	A	G	.	clustered_events;haplotype;normal_artifact	AS_FilterStatus=SITE;AS_SB_TABLE=109,66|2,3;DP=180;ECNT=7;GERMQ=93;MBQ=25,20;MFRL=151,130;MMQ=60,60;MPOS=39;NALOD=-5.316e+00;NLOD=11.77;POPAF=6.00;TLOD=8.32;ANN=G|synonymous_variant|LOW|Ranbp2|ENSMUSG00000003226|transcript|ENSMUST00000003310|protein_coding|20/29|c.5709A>G|p.Glu1903Glu|5837/9477|5709/9162|1903/3053||	GT:AD:AF:DP:F1R2:F2R1:PGT:PID:PS:SB	0|0:92,2:0.028:94:22,0:70,2:0|1:58479165_T_C:58479165:62,30,1,1	0|1:83,3:0.043:86:32,1:47,2:0|1:58479165_T_C:58479165:47,36,1,2	RY1114T6	chr10_58479168_A>G	92	2	83	3	synonymous_variant	LOW	Ranbp2	.	snv	A>G	A:T>G:C	2	.
chr10	58479177	.	T	C	.	clustered_events;haplotype;normal_artifact	AS_FilterStatus=SITE;AS_SB_TABLE=113,68|2,3;DP=186;ECNT=7;GERMQ=93;MBQ=33,20;MFRL=151,130;MMQ=60,60;MPOS=30;NALOD=-5.304e+00;NLOD=12.07;POPAF=6.00;TLOD=8.26;ANN=C|synonymous_variant|LOW|Ranbp2|ENSMUSG00000003226|transcript|ENSMUST00000003310|protein_coding|20/29|c.5718T>C|p.Gly1906Gly|5846/9477|5718/9162|1906/3053||	GT:AD:AF:DP:F1R2:F2R1:PGT:PID:PS:SB	0|0:94,2:0.028:96:22,0:68,2:0|1:58479165_T_C:58479165:64,30,1,1	0|1:87,3:0.042:90:35,1:51,2:0|1:58479165_T_C:58479165:49,38,1,2	RY1114T6	chr10_58479177_T>C	94	2	87	3	synonymous_variant	LOW	Ranbp2	.	snv	T>C	A:T>G:C	2	.
chr10	58479183	.	G	A	.	clustered_events;haplotype;normal_artifact	AS_FilterStatus=SITE;AS_SB_TABLE=115,70|1,3;DP=193;ECNT=7;GERMQ=93;MBQ=35,27;MFRL=149,121;MMQ=60,60;MPOS=28;NALOD=-5.285e+00;NLOD=12.37;POPAF=6.00;TLOD=8.22;ANN=A|synonymous_variant|LOW|Ranbp2|ENSMUSG00000003226|transcript|ENSMUST00000003310|protein_coding|20/29|c.5724G>A|p.Leu1908Leu|5852/9477|5724/9162|1908/3053||	GT:AD:AF:DP:F1R2:F2R1:PGT:PID:PS:SB	0|0:96,1:0.027:97:24,0:70,1:0|1:58479165_T_C:58479165:64,32,0,1	0|1:89,3:0.040:92:36,1:53,2:0|1:58479165_T_C:58479165:51,38,1,2	RY1114T6	chr10_58479183_G>A	96	1	89	3	synonymous_variant	LOW	Ranbp2	.	snv	G>A	G:C>A:T	2	.
chr10	58480098	.	G	A	.	normal_artifact;weak_evidence	AS_FilterStatus=weak_evidence;AS_SB_TABLE=83,67|1,3;DP=166;ECNT=1;GERMQ=93;MBQ=35,37;MFRL=149,141;MMQ=60,60;MPOS=16;NALOD=-2.685e+00;NLOD=9.77;POPAF=6.00;TLOD=3.07;ANN=A|synonymous_variant|LOW|Ranbp2|ENSMUSG00000003226|transcript|ENSMUST00000003310|protein_coding|20/29|c.6639G>A|p.Gln2213Gln|6767/9477|6639/9162|2213/3053||	GT:AD:AF:DP:F1R2:F2R1:SB	0/0:72,2:0.049:74:34,0:38,2:42,30,0,2	0/1:78,2:0.043:80:22,1:56,1:41,37,1,1	RY1114T6	chr10_58480098_G>A	72	2	78	2	synonymous_variant	LOW	Ranbp2	.	snv	G>A	G:C>A:T	1	.
chr10	58480333	.	CATCT	C	.	clustered_events;haplotype;normal_artifact;strand_bias;weak_evidence	AS_FilterStatus=weak_evidence,strand_bias;AS_SB_TABLE=50,47|4,0;DP=105;ECNT=16;GERMQ=93;MBQ=34,37;MFRL=156,157;MMQ=60,60;MPOS=21;NALOD=-1.540e+00;NLOD=4.23;POPAF=6.00;TLOD=4.22;ANN=C|frameshift_variant|HIGH|Ranbp2|ENSMUSG00000003226|transcript|ENSMUST00000003310|protein_coding|20/29|c.6875_6878delATCT|p.His2292fs|7003/9477|6875/9162|2292/3053||;LOF=(Ranbp2|ENSMUSG00000003226|1|1.00)	GT:AD:AF:DP:F1R2:F2R1:PGT:PID:PS:SB	0|0:38,2:0.063:40:13,0:24,2:0|1:58480333_CATCT_C:58480333:22,16,2,0	0|1:59,2:0.058:61:23,1:34,1:0|1:58480333_CATCT_C:58480333:28,31,2,0	RY1114T6	chr10_58480333_CATCT>C	38	2	59	2	frameshift_variant	HIGH	Ranbp2	.	indel	.	.	1	.
chr10	58480338	.	G	GGTCA	.	clustered_events;haplotype;normal_artifact;strand_bias;weak_evidence	AS_FilterStatus=weak_evidence,strand_bias;AS_SB_TABLE=48,50|4,0;DP=102;ECNT=16;GERMQ=93;MBQ=36,31;MFRL=155,157;MMQ=60,60;MPOS=21;NALOD=-1.553e+00;NLOD=4.23;POPAF=6.00;TLOD=4.20;ANN=GGTCA|frameshift_variant|HIGH|Ranbp2|ENSMUSG00000003226|transcript|ENSMUST00000003310|protein_coding|20/29|c.6879_6880insGTCA|p.Ser2294fs|7008/9477|6880/9162|2294/3053||;LOF=(Ranbp2|ENSMUSG00000003226|1|1.00)	GT:AD:AF:DP:F1R2:F2R1:PGT:PID:PS:SB	0|0:38,2:0.064:40:12,0:24,2:0|1:58480333_CATCT_C:58480333:21,17,2,0	0|1:60,2:0.058:62:21,0:35,1:0|1:58480333_CATCT_C:58480333:27,33,2,0	RY1114T6	chr10_58480338_G>GGTCA	38	2	60	2	frameshift_variant	HIGH	Ranbp2	.	indel	.	.	1	.
chr10	58480344	.	C	T	.	clustered_events;haplotype;normal_artifact;weak_evidence	AS_FilterStatus=weak_evidence;AS_SB_TABLE=46,51|4,1;DP=102;ECNT=16;GERMQ=93;MBQ=36,37;MFRL=156,157;MMQ=60,60;MPOS=14;NALOD=-1.583e+00;NLOD=3.93;POPAF=6.00;TLOD=4.20;ANN=T|synonymous_variant|LOW|Ranbp2|ENSMUSG00000003226|transcript|ENSMUST00000003310|protein_coding|20/29|c.6885C>T|p.Thr2295Thr|7013/9477|6885/9162|2295/3053||	GT:AD:AF:DP:F1R2:F2R1:PGT:PID:PS:SB	0|0:37,3:0.066:40:12,0:24,3:0|1:58480333_CATCT_C:58480333:20,17,2,1	0|1:60,2:0.058:62:21,1:35,1:0|1:58480333_CATCT_C:58480333:26,34,2,0	RY1114T6	chr10_58480344_C>T	37	3	60	2	synonymous_variant	LOW	Ranbp2	.	snv	C>T	G:C>A:T	1	.
chr10	58480347	.	T	C	.	clustered_events;haplotype;normal_artifact;weak_evidence	AS_FilterStatus=weak_evidence;AS_SB_TABLE=42,51|4,1;DP=102;ECNT=16;GERMQ=93;MBQ=34,36;MFRL=159,157;MMQ=60,60;MPOS=11;NALOD=-1.547e+00;NLOD=4.23;POPAF=6.00;TLOD=4.20;ANN=C|synonymous_variant|LOW|Ranbp2|ENSMUSG00000003226|transcript|ENSMUST00000003310|protein_coding|20/29|c.6888T>C|p.Pro2296Pro|7016/9477|6888/9162|2296/3053||	GT:AD:AF:DP:F1R2:F2R1:PGT:PID:PS:SB	0|0:37,3:0.064:40:13,0:23,3:0|1:58480333_CATCT_C:58480333:20,17,2,1	0|1:56,2:0.058:58:21,1:33,1:0|1:58480333_CATCT_C:58480333:22,34,2,0	RY1114T6	chr10_58480347_T>C	37	3	56	2	synonymous_variant	LOW	Ranbp2	.	snv	T>C	A:T>G:C	1	.
chr10	58480375	.	A	G	.	clustered_events;haplotype;normal_artifact	AS_FilterStatus=SITE;AS_SB_TABLE=47,47|2,3;DP=101;ECNT=16;GERMQ=93;MBQ=33,36;MFRL=159,156;MMQ=60,60;MPOS=34;NALOD=1.54;NLOD=9.93;POPAF=6.00;TLOD=8.87;ANN=G|missense_variant|MODERATE|Ranbp2|ENSMUSG00000003226|transcript|ENSMUST00000003310|protein_coding|20/29|c.6916A>G|p.Ile2306Val|7044/9477|6916/9162|2306/3053||	GT:AD:AF:DP:F1R2:F2R1:PGT:PID:PS:SB	0|0:41,2:0.028:43:11,0:29,2:0|1:58480375_A_G:58480375:23,18,0,2	0|1:53,3:0.065:56:19,2:32,1:0|1:58480375_A_G:58480375:24,29,2,1	RY1114T6	chr10_58480375_A>G	41	2	53	3	missense_variant	MODERATE	Ranbp2	.	snv	A>G	A:T>G:C	2	.
chr10	58480377	.	T	A	.	clustered_events;haplotype;normal_artifact	AS_FilterStatus=SITE;AS_SB_TABLE=48,49|3,3;DP=103;ECNT=16;GERMQ=93;MBQ=34,36;MFRL=159,139;MMQ=60,60;MPOS=36;NALOD=1.55;NLOD=10.23;POPAF=6.00;TLOD=12.19;ANN=A|synonymous_variant|LOW|Ranbp2|ENSMUSG00000003226|transcript|ENSMUST00000003310|protein_coding|20/29|c.6918T>A|p.Ile2306Ile|7046/9477|6918/9162|2306/3053||	GT:AD:AF:DP:F1R2:F2R1:PGT:PID:PS:SB	0|0:43,2:0.027:45:10,0:30,2:0|1:58480375_A_G:58480375:24,19,0,2	0|1:54,4:0.085:58:17,2:34,1:0|1:58480375_A_G:58480375:24,30,3,1	RY1114T6	chr10_58480377_T>A	43	2	54	4	synonymous_variant	LOW	Ranbp2	.	snv	T>A	A:T>T:A	2	.
chr10	58480383	.	T	A	.	clustered_events;haplotype;normal_artifact	AS_FilterStatus=SITE;AS_SB_TABLE=51,48|3,3;DP=108;ECNT=16;GERMQ=93;MBQ=33,35;MFRL=159,139;MMQ=60,60;MPOS=38;NALOD=1.57;NLOD=10.54;POPAF=6.00;TLOD=12.18;ANN=A|synonymous_variant|LOW|Ranbp2|ENSMUSG00000003226|transcript|ENSMUST00000003310|protein_coding|20/29|c.6924T>A|p.Val2308Val|7052/9477|6924/9162|2308/3053||	GT:AD:AF:DP:F1R2:F2R1:PGT:PID:PS:SB	0|0:44,2:0.026:46:10,0:31,2:0|1:58480375_A_G:58480375:25,19,0,2	0|1:55,4:0.085:59:19,3:35,1:0|1:58480375_A_G:58480375:26,29,3,1	RY1114T6	chr10_58480383_T>A	44	2	55	4	synonymous_variant	LOW	Ranbp2	.	snv	T>A	A:T>T:A	2	.
chr10	58480404	.	A	G	.	clustered_events;haplotype;normal_artifact	AS_FilterStatus=SITE;AS_SB_TABLE=53,40|2,3;DP=100;ECNT=16;GERMQ=93;MBQ=34,34;MFRL=161,156;MMQ=60,60;MPOS=37;NALOD=1.57;NLOD=10.53;POPAF=6.00;TLOD=7.69;ANN=G|synonymous_variant|LOW|Ranbp2|ENSMUSG00000003226|transcript|ENSMUST00000003310|protein_coding|20/29|c.6945A>G|p.Glu2315Glu|7073/9477|6945/9162|2315/3053||	GT:AD:AF:DP:F1R2:F2R1:PGT:PID:PS:SB	0|0:43,2:0.026:45:10,0:32,2:0|1:58480404_A_G:58480404:26,17,0,2	0|1:50,3:0.085:53:15,2:31,1:0|1:58480404_A_G:58480404:27,23,2,1	RY1114T6	chr10_58480404_A>G	43	2	50	3	synonymous_variant	LOW	Ranbp2	.	snv	A>G	A:T>G:C	2	.
chr10	58480414	.	T	G	.	clustered_events;haplotype;normal_artifact	AS_FilterStatus=SITE;AS_SB_TABLE=53,41|2,3;DP=99;ECNT=16;GERMQ=93;MBQ=34,36;MFRL=161,156;MMQ=60,60;MPOS=28;NALOD=1.57;NLOD=10.54;POPAF=6.00;TLOD=7.69;ANN=G|missense_variant|MODERATE|Ranbp2|ENSMUSG00000003226|transcript|ENSMUST00000003310|protein_coding|20/29|c.6955T>G|p.Leu2319Val|7083/9477|6955/9162|2319/3053||	GT:AD:AF:DP:F1R2:F2R1:PGT:PID:PS:SB	0|0:44,2:0.026:46:9,0:32,2:0|1:58480404_A_G:58480404:25,19,0,2	0|1:50,3:0.085:53:17,2:31,1:0|1:58480404_A_G:58480404:28,22,2,1	RY1114T6	chr10_58480414_T>G	44	2	50	3	missense_variant	MODERATE	Ranbp2	.	snv	T>G	A:T>C:G	2	.
chr10	58480416	.	A	T	.	clustered_events;haplotype;normal_artifact	AS_FilterStatus=SITE;AS_SB_TABLE=54,40|2,3;DP=99;ECNT=16;GERMQ=93;MBQ=34,35;MFRL=161,156;MMQ=60,60;MPOS=26;NALOD=1.58;NLOD=10.84;POPAF=6.00;TLOD=7.65;ANN=T|missense_variant|MODERATE|Ranbp2|ENSMUSG00000003226|transcript|ENSMUST00000003310|protein_coding|20/29|c.6957A>T|p.Leu2319Phe|7085/9477|6957/9162|2319/3053||	GT:AD:AF:DP:F1R2:F2R1:PGT:PID:PS:SB	0|0:43,2:0.026:45:9,0:32,2:0|1:58480404_A_G:58480404:24,19,0,2	0|1:51,3:0.083:54:17,2:32,1:0|1:58480404_A_G:58480404:30,21,2,1	RY1114T6	chr10_58480416_A>T	43	2	51	3	missense_variant	MODERATE	Ranbp2	.	snv	A>T	A:T>T:A	2	.
chr10	58480418	.	C	T	.	clustered_events;haplotype;normal_artifact	AS_FilterStatus=SITE;AS_SB_TABLE=57,39|2,3;DP=101;ECNT=16;GERMQ=93;MBQ=36,35;MFRL=162,156;MMQ=60,60;MPOS=28;NALOD=1.58;NLOD=10.84;POPAF=6.00;TLOD=7.58;ANN=T|missense_variant|MODERATE|Ranbp2|ENSMUSG00000003226|transcript|ENSMUST00000003310|protein_coding|20/29|c.6959C>T|p.Thr2320Ile|7087/9477|6959/9162|2320/3053||	GT:AD:AF:DP:F1R2:F2R1:PGT:PID:PS:SB	0|0:43,2:0.026:45:9,0:32,2:0|1:58480404_A_G:58480404:25,18,0,2	0|1:53,3:0.080:56:17,2:33,0:0|1:58480404_A_G:58480404:32,21,2,1	RY1114T6	chr10_58480418_C>T	43	2	53	3	missense_variant	MODERATE	Ranbp2	.	snv	C>T	G:C>A:T	2	.
chr10	58480425	.	A	T	.	clustered_events;haplotype;normal_artifact;weak_evidence	AS_FilterStatus=weak_evidence;AS_SB_TABLE=58,42|1,3;DP=104;ECNT=16;GERMQ=93;MBQ=36,34;MFRL=162,139;MMQ=60,60;MPOS=21;NALOD=1.57;NLOD=10.54;POPAF=6.00;TLOD=4.24;ANN=T|synonymous_variant|LOW|Ranbp2|ENSMUSG00000003226|transcript|ENSMUST00000003310|protein_coding|20/29|c.6966A>T|p.Gly2322Gly|7094/9477|6966/9162|2322/3053||	GT:AD:AF:DP:F1R2:F2R1:PGT:PID:PS:SB	0|0:45,2:0.026:47:9,0:34,2:0|1:58480404_A_G:58480404:24,21,0,2	0|1:55,2:0.059:57:18,2:36,0:0|1:58480404_A_G:58480404:34,21,1,1	RY1114T6	chr10_58480425_A>T	45	2	55	2	synonymous_variant	LOW	Ranbp2	.	snv	A>T	A:T>T:A	1	.
chr10	58480431	.	A	T	.	clustered_events;haplotype;normal_artifact;weak_evidence	AS_FilterStatus=weak_evidence;AS_SB_TABLE=57,43|1,3;DP=104;ECNT=16;GERMQ=93;MBQ=36,36;MFRL=162,139;MMQ=60,60;MPOS=15;NALOD=1.57;NLOD=10.54;POPAF=6.00;TLOD=4.24;ANN=T|missense_variant|MODERATE|Ranbp2|ENSMUSG00000003226|transcript|ENSMUST00000003310|protein_coding|20/29|c.6972A>T|p.Glu2324Asp|7100/9477|6972/9162|2324/3053||	GT:AD:AF:DP:F1R2:F2R1:PGT:PID:PS:SB	0|0:46,2:0.026:48:11,0:33,2:0|1:58480404_A_G:58480404:24,22,0,2	0|1:54,2:0.059:56:20,2:34,0:0|1:58480404_A_G:58480404:33,21,1,1	RY1114T6	chr10_58480431_A>T	46	2	54	2	missense_variant	MODERATE	Ranbp2	.	snv	A>T	A:T>T:A	1	.
chr10	58480435	.	AT	GC	.	clustered_events;haplotype;normal_artifact;weak_evidence	AS_FilterStatus=weak_evidence;AS_SB_TABLE=57,49|1,3;DP=110;ECNT=16;GERMQ=93;MBQ=33,36;MFRL=163,139;MMQ=60,60;MPOS=11;NALOD=1.58;NLOD=10.84;POPAF=6.00;TLOD=4.21;ANN=GC|missense_variant|MODERATE|Ranbp2|ENSMUSG00000003226|transcript|ENSMUST00000003310|protein_coding|20/29|c.6976_6977delATinsGC|p.Ile2326Ala|7104/9477|6976/9162|2326/3053||	GT:AD:AF:DP:F1R2:F2R1:PGT:PID:PS:SB	0|0:49,2:0.026:51:11,0:34,2:0|1:58480404_A_G:58480404:24,25,0,2	0|1:57,2:0.058:59:19,2:36,0:0|1:58480404_A_G:58480404:33,24,1,1	RY1114T6	chr10_58480435_AT>GC	49	2	57	2	missense_variant	MODERATE	Ranbp2	.	indel	.	.	1	.
chr10	58480441	.	A	G	.	clustered_events;haplotype;normal_artifact;weak_evidence	AS_FilterStatus=weak_evidence;AS_SB_TABLE=61,50|1,3;DP=115;ECNT=16;GERMQ=93;MBQ=33,35;MFRL=163,139;MMQ=60,60;MPOS=5;NALOD=1.61;NLOD=11.74;POPAF=6.00;TLOD=4.13;ANN=G|missense_variant|MODERATE|Ranbp2|ENSMUSG00000003226|transcript|ENSMUST00000003310|protein_coding|20/29|c.6982A>G|p.Thr2328Ala|7110/9477|6982/9162|2328/3053||	GT:AD:AF:DP:F1R2:F2R1:PGT:PID:PS:SB	0|0:52,2:0.024:54:14,0:35,2:0|1:58480404_A_G:58480404:27,25,0,2	0|1:59,2:0.055:61:20,2:34,0:0|1:58480404_A_G:58480404:34,25,1,1	RY1114T6	chr10_58480441_A>G	52	2	59	2	missense_variant	MODERATE	Ranbp2	.	snv	A>G	A:T>G:C	1	.
chr10	58480444	.	A	G	.	clustered_events;haplotype;weak_evidence	AS_FilterStatus=weak_evidence;AS_SB_TABLE=61,49|1,2;DP=113;ECNT=16;GERMQ=93;MBQ=34,38;MFRL=164,121;MMQ=60,60;MPOS=20;NALOD=1.60;NLOD=11.44;POPAF=6.00;TLOD=4.18;ANN=G|missense_variant|MODERATE|Ranbp2|ENSMUSG00000003226|transcript|ENSMUST00000003310|protein_coding|20/29|c.6985A>G|p.Thr2329Ala|7113/9477|6985/9162|2329/3053||	GT:AD:AF:DP:F1R2:F2R1:PGT:PID:PS:SB	0|0:54,1:0.025:55:14,0:37,1:0|1:58480404_A_G:58480404:27,27,0,1	0|1:56,2:0.057:58:20,1:34,0:0|1:58480404_A_G:58480404:34,22,1,1	RY1114T6	chr10_58480444_A>G	54	1	56	2	missense_variant	MODERATE	Ranbp2	.	snv	A>G	A:T>G:C	1	.
chr10	60042189	.	A	G	.	clustered_events;haplotype	AS_FilterStatus=SITE;AS_SB_TABLE=58,83|1,1;DP=148;ECNT=5;GERMQ=93;MBQ=33,20;MFRL=155,112;MMQ=60,60;MPOS=34;NALOD=1.69;NLOD=14.45;POPAF=6.00;TLOD=5.43;ANN=G|synonymous_variant|LOW|Ascc1|ENSMUSG00000044475|transcript|ENSMUST00000050516|protein_coding|6/11|c.555A>G|p.Val185Val|682/1488|555/1071|185/356||	GT:AD:AF:DP:F1R2:F2R1:PGT:PID:PS:SB	0|0:68,0:0.020:68:21,0:47,0:0|1:60042189_A_G:60042189:31,37,0,0	0|1:73,2:0.032:75:11,0:61,2:0|1:60042189_A_G:60042189:27,46,1,1	RY1114T6	chr10_60042189_A>G	68	0	73	2	synonymous_variant	LOW	Ascc1	.	snv	A>G	A:T>G:C	1	.
[truncated: 20,771 more rows]

## Sheet: mm10_Filterd_PASS
#CHROM	(Multiple Items)
ID	.
FILTER	PASS
hardFilter	PASS
count	1
Count of mutID	Column Labels
Row Labels	RY1114T6	RY1114T7	RY1115T2	RY1115T6	Grand Total
indel	5	9	2	8	24
.	5	9	2	8	24
[truncated: 8 more rows]

## Sheet: Variants_mm39
Supplemental Table S3. Somatic mutations in the tumors detected using WES (mm39)
[truncated: 21,790 more rows]

[truncated: 1 more sheets: mm39_Filterd_PASS]
