# Supplementary material for: Oxidative stress accelerates intestinal tumorigenesis by enhancing 8-oxoguanine-mediated mutagenesis in MUTYH-deficient mice
Source: HighWire-hosted journal article supplement (doi:10.1101/gr.278326.123), 2024-01-01
Supplement: Supplemental_Table_S4.xlsx [file Supplemental_Table_S4.xlsx]

## Sheet: Table S4　Cosine similarity
Supplemental Tabel S4. Cosine similarity
	Y4tumor	TOY	rpsL	MAP	Signature_1	Signature_2	Signature_3	Signature_4	Signature_5	Signature_6	Signature_7	Signature_8	Signature_9	Signature_10	Signature_11	Signature_12	Signature_13	Signature_14	Signature_15	Signature_16	Signature_17	Signature_18	Signature_19	Signature_20	Signature_21	Signature_22	Signature_23	Signature_24	Signature_25	Signature_26	Signature_27	Signature_28	Signature_29	Signature_30	SBS1	SBS2	SBS3	SBS4	SBS5	SBS6	SBS7a	SBS7b	SBS7c	SBS7d	SBS8	SBS9	SBS10a	SBS10b	SBS10c
Y4tumor	1	0.830852	0.56221	0.862965	0.173205	0.0582984	0.437831	0.746821	0.389776	0.27053	0.0476316	0.664867	0.368535	0.527359	0.0676395	0.212197	0.0733949	0.558494	0.216641	0.341542	0.0481877	0.834791	0.183391	0.4475	0.0832953	0.0551758	0.0582365	0.623592	0.342524	0.157002	0.0605782	0.0422892	0.685949	0.0761758	0.0230951	0.0300894	0.427168	0.823744	0.286664	0.0826018	0.0367092	0.0590717	0.0906898	0.0861739	0.615337	0.24361	0.591379	0.146223	0.709088
TOY	0.830852	1	0.414757	0.882765	0.148642	0.0394773	0.362747	0.702382	0.32846	0.170062	0.0376337	0.606193	0.317657	0.484243	0.0319712	0.127032	0.0642098	0.513477	0.182306	0.258038	0.0320485	0.947174	0.119123	0.279734	0.0335207	0.0282597	0.0126515	0.714864	0.290805	0.0778096	0.0577544	0.0165382	0.779227	0.0658715	0.0236192	0.0132327	0.3214	0.692916	0.220572	0.0350197	0.0325994	0.0370828	0.0457778	0.0298441	0.568201	0.211543	0.55051	0.122663	0.629385
rpsL	0.56221	0.414757	1	0.41682	0.185784	0.0787415	0.281446	0.488435	0.282034	0.256236	0.298396	0.34857	0.159584	0.0860161	0.209667	0.137791	0.0521016	0.359449	0.129208	0.213977	0.0393476	0.42627	0.161564	0.355917	0.0653703	0.0285144	0.0728511	0.44499	0.173894	0.107803	0.0372815	0.0159137	0.422511	0.20992	0.0844649	0.0592971	0.28713	0.555661	0.229419	0.127349	0.277217	0.246176	0.068947	0.0424235	0.334536	0.092676	0.0483642	0.0693227	0.21076
MAP	0.862965	0.882765	0.41682	1	0.258426	0.0767237	0.394068	0.666391	0.397951	0.216139	0.0553833	0.632954	0.406254	0.665248	0.0596732	0.169663	0.110661	0.447938	0.207956	0.317994	0.0537639	0.892279	0.179226	0.26339	0.0588982	0.0481095	0.0543498	0.603421	0.339644	0.113556	0.0709656	0.0504796	0.653424	0.0977448	0.116089	0.03506	0.343778	0.660131	0.287115	0.121992	0.045537	0.060174	0.0810622	0.0636351	0.547873	0.291246	0.749469	0.18364	0.809271
Signature_1	0.173205	0.148642	0.185784	0.258426	1	0.156629	0.300468	0.25596	0.500145	0.817766	0.269729	0.386206	0.311072	0.305359	0.291134	0.259818	0.0618344	0.531737	0.534589	0.310255	0.129442	0.231246	0.482478	0.456205	0.289911	0.0691832	0.291736	0.226719	0.380339	0.33668	0.0878484	0.0901008	0.373461	0.427347	0.931799	0.127081	0.302378	0.196489	0.462129	0.825022	0.210429	0.265641	0.0936544	0.127067	0.203647	0.221252	0.106041	0.36485	0.239995
Signature_2	0.0582984	0.0394773	0.0787415	0.0767237	0.156629	1	0.208842	0.0898323	0.209841	0.0823133	0.544863	0.139499	0.111478	0.141112	0.359163	0.125579	0.389703	0.141121	0.091509	0.244507	0.0956106	0.1054	0.229849	0.108315	0.054532	0.014137	0.127671	0.175097	0.175893	0.102926	0.0665624	0.0435304	0.118854	0.553218	0.0338451	0.984466	0.164121	0.0738451	0.308693	0.094439	0.708236	0.315011	0.0771779	0.0907616	0.0655114	0.0783669	0.0499468	0.271425	0.082337
Signature_3	0.437831	0.362747	0.281446	0.394068	0.300468	0.208842	1	0.690935	0.821579	0.328392	0.243009	0.798402	0.608778	0.226301	0.305718	0.532723	0.392515	0.412058	0.310282	0.734751	0.272083	0.462788	0.476237	0.460491	0.291469	0.288358	0.277939	0.555593	0.687385	0.431639	0.190444	0.285945	0.546548	0.421359	0.0692807	0.133357	0.965049	0.609899	0.768621	0.229388	0.209683	0.27096	0.327743	0.225022	0.683754	0.524388	0.186951	0.138492	0.403121
Signature_4	0.746821	0.702382	0.488435	0.666391	0.25596	0.0898323	0.690935	1	0.597277	0.313129	0.15264	0.824087	0.410373	0.289918	0.204083	0.341376	0.110883	0.480723	0.25622	0.52007	0.099423	0.740881	0.381151	0.465355	0.144508	0.324146	0.218279	0.832964	0.583591	0.230606	0.150998	0.0806843	0.81963	0.268797	0.0516263	0.0559233	0.722613	0.95915	0.496955	0.154272	0.111494	0.206781	0.147724	0.105192	0.826637	0.281736	0.29975	0.108652	0.474872
Signature_5	0.389776	0.32846	0.282034	0.397951	0.500145	0.209841	0.821579	0.597277	1	0.52971	0.367309	0.74304	0.731263	0.291445	0.458885	0.789222	0.140606	0.523289	0.484608	0.908688	0.327364	0.427831	0.646978	0.63972	0.527955	0.281526	0.443735	0.469985	0.734563	0.70917	0.197329	0.315698	0.522913	0.590708	0.216587	0.169061	0.849124	0.490857	0.958904	0.429273	0.307697	0.410244	0.309328	0.347271	0.566027	0.631209	0.212595	0.211596	0.489797
Signature_6	0.27053	0.170062	0.256236	0.216139	0.817766	0.0823133	0.328392	0.313129	0.52971	1	0.164997	0.358338	0.310747	0.206531	0.320275	0.312403	0.0262671	0.771368	0.807956	0.319401	0.140046	0.207885	0.559311	0.738696	0.323019	0.0543723	0.413302	0.274584	0.361552	0.403416	0.0836809	0.125185	0.354848	0.434094	0.696616	0.0607563	0.355054	0.279637	0.504848	0.937351	0.118628	0.167449	0.0721284	0.0986217	0.209324	0.233305	0.0637719	0.233818	0.237848
Signature_7	0.0476316	0.0376337	0.298396	0.0553833	0.269729	0.544863	0.243009	0.15264	0.367309	0.164997	1	0.143161	0.15716	0.200717	0.782096	0.178431	0.120999	0.240576	0.167513	0.268808	0.122386	0.0993014	0.511134	0.18469	0.10538	0.0345086	0.478764	0.138525	0.189073	0.141373	0.0660313	0.0505065	0.0934675	0.763654	0.0772292	0.52814	0.274872	0.109916	0.414557	0.18198	0.955922	0.888162	0.108953	0.105968	0.0675004	0.128777	0.0185735	0.389718	0.0928465
Signature_8	0.664867	0.606193	0.34857	0.632954	0.386206	0.139499	0.798402	0.824087	0.74304	0.358338	0.143161	1	0.602794	0.370716	0.197274	0.457267	0.126293	0.505186	0.300587	0.664391	0.199824	0.687022	0.409519	0.45114	0.24186	0.370315	0.174244	0.640932	0.721416	0.359407	0.227052	0.190185	0.762293	0.294566	0.183323	0.104673	0.785634	0.800781	0.642743	0.228256	0.11961	0.17091	0.377134	0.215374	0.941588	0.467303	0.359954	0.172326	0.597669
Signature_9	0.368535	0.317657	0.159584	0.406254	0.311072	0.111478	0.608778	0.410373	0.731263	0.310747	0.15716	0.602794	1	0.373566	0.186819	0.570357	0.0959893	0.330708	0.290784	0.72016	0.598652	0.38731	0.334125	0.384379	0.346541	0.200327	0.170876	0.322232	0.554628	0.488578	0.155494	0.647474	0.39837	0.306285	0.127864	0.0839983	0.611368	0.366463	0.660592	0.19786	0.127462	0.179784	0.347378	0.271486	0.440783	0.975509	0.301186	0.213172	0.580604
Signature_10	0.527359	0.484243	0.0860161	0.665248	0.305359	0.141112	0.226301	0.289918	0.291445	0.206531	0.200717	0.370716	0.373566	1	0.107971	0.110788	0.0640653	0.345097	0.183743	0.223519	0.126956	0.534215	0.146501	0.18762	0.0958864	0.0231583	0.0622047	0.231808	0.280806	0.12236	0.0432528	0.161695	0.312354	0.12152	0.168924	0.104936	0.171018	0.273142	0.258598	0.165561	0.154392	0.157489	0.0537559	0.0692499	0.245624	0.307273	0.858734	0.676526	0.808802
Signature_11	0.0676395	0.0319712	0.209667	0.0596732	0.291134	0.359163	0.305718	0.204083	0.458885	0.320275	0.782096	0.197274	0.186819	0.107971	1	0.201822	0.069504	0.414018	0.369722	0.300798	0.0976232	0.0858445	0.737076	0.341197	0.146982	0.0374194	0.821894	0.142981	0.226453	0.179696	0.0779188	0.0446641	0.114842	0.817527	0.0613315	0.343815	0.378203	0.137066	0.511408	0.359923	0.683303	0.876093	0.0908055	0.124107	0.0970465	0.158744	0.0246635	0.219006	0.108355
Signature_12	0.212197	0.127032	0.137791	0.169663	0.259818	0.125579	0.532723	0.341376	0.789222	0.312403	0.178431	0.457267	0.570357	0.110788	0.201822	1	0.0572191	0.252215	0.319902	0.818645	0.258801	0.196071	0.377505	0.534443	0.779633	0.135778	0.20609	0.241012	0.529563	0.918136	0.0976779	0.260727	0.302214	0.307835	0.0450834	0.110052	0.607139	0.273356	0.763311	0.164475	0.15042	0.202136	0.26837	0.436708	0.323877	0.501529	0.0563947	0.0874685	0.322503
Signature_13	0.0733949	0.0642098	0.0521016	0.110661	0.0618344	0.389703	0.392515	0.110883	0.140606	0.0262671	0.120999	0.126293	0.0959893	0.0640653	0.069504	0.0572191	1	0.0453303	0.0433379	0.199124	0.0306023	0.0992809	0.0987388	0.0341421	0.0176832	0.00882053	0.0296478	0.147078	0.192105	0.0783239	0.0303138	0.0175104	0.0663474	0.130139	0.0099941	0.23468	0.305998	0.0885744	0.204039	0.0256061	0.165336	0.0552043	0.0662821	0.0246357	0.0578851	0.0802622	0.0581965	0.0466689	0.0744114
Signature_14	0.558494	0.513477	0.359449	0.447938	0.531737	0.141121	0.412058	0.480723	0.523289	0.771368	0.240576	0.505186	0.330708	0.345097	0.414018	0.252215	0.0453303	1	0.713939	0.329752	0.110162	0.436524	0.544779	0.723371	0.237684	0.046366	0.423153	0.42907	0.365536	0.314203	0.0835784	0.080286	0.498851	0.452951	0.359672	0.119701	0.413501	0.465019	0.468221	0.641891	0.208415	0.254801	0.0911947	0.121502	0.384598	0.243765	0.29798	0.197092	0.455025
Signature_15	0.216641	0.182306	0.129208	0.207956	0.534589	0.091509	0.310282	0.25622	0.484608	0.807956	0.167513	0.300587	0.290784	0.183743	0.369722	0.319902	0.0433379	0.713939	1	0.313256	0.110801	0.210696	0.556741	0.509716	0.373958	0.059449	0.489073	0.306268	0.30316	0.415319	0.0907	0.0959836	0.295226	0.404031	0.380184	0.0751116	0.338169	0.204221	0.451098	0.788782	0.140655	0.164412	0.0607414	0.127574	0.195027	0.233954	0.109829	0.14673	0.233265
Signature_16	0.341542	0.258038	0.213977	0.317994	0.310255	0.244507	0.734751	0.52007	0.908688	0.319401	0.268808	0.664391	0.72016	0.223519	0.300798	0.818645	0.199124	0.329752	0.313256	1	0.362221	0.351453	0.485497	0.511967	0.480873	0.261791	0.274999	0.400095	0.661517	0.716717	0.15655	0.347911	0.440785	0.417812	0.0574184	0.202814	0.769463	0.443424	0.908426	0.197267	0.242458	0.293869	0.276092	0.323672	0.513443	0.633087	0.161036	0.169122	0.431477
Signature_17	0.0481877	0.0320485	0.0393476	0.0537639	0.129442	0.0956106	0.272083	0.099423	0.327364	0.140046	0.122386	0.199824	0.598652	0.126956	0.0976232	0.258801	0.0306023	0.110162	0.110801	0.362221	1	0.0718956	0.123221	0.154153	0.123779	0.0648764	0.0617723	0.0727548	0.234239	0.20259	0.0317485	0.650647	0.0883409	0.182425	0.0576138	0.0897344	0.26315	0.0698142	0.268493	0.0777645	0.108989	0.1142	0.146366	0.103429	0.112631	0.599941	0.0294538	0.118261	0.226103
Signature_18	0.834791	0.947174	0.42627	0.892279	0.231246	0.1054	0.462788	0.740881	0.427831	0.207885	0.0993014	0.687022	0.38731	0.534215	0.0858445	0.196071	0.0992809	0.436524	0.210696	0.351453	0.0718956	1	0.197118	0.272578	0.0731626	0.0742236	0.0663289	0.722028	0.37893	0.123588	0.0797166	0.0525436	0.818395	0.149435	0.0785847	0.0737174	0.423179	0.731062	0.328276	0.102641	0.0910275	0.0928861	0.0771857	0.0710706	0.623641	0.264284	0.578574	0.175387	0.656141
Signature_19	0.183391	0.119123	0.161564	0.179226	0.482478	0.229849	0.476237	0.381151	0.646978	0.559311	0.511134	0.409519	0.334125	0.146501	0.737076	0.377505	0.0987388	0.544779	0.556741	0.485497	0.123221	0.197118	1	0.535199	0.252158	0.097205	0.895669	0.276159	0.390995	0.321232	0.119568	0.0819982	0.271157	0.685256	0.230941	0.19288	0.556122	0.294971	0.646573	0.570116	0.395736	0.65687	0.154732	0.197476	0.282444	0.2819	0.0752842	0.166899	0.215534
Signature_20	0.4475	0.279734	0.355917	0.26339	0.456205	0.108315	0.460491	0.465355	0.63972	0.738696	0.18469	0.45114	0.384379	0.18762	0.341197	0.534443	0.0341421	0.723371	0.509716	0.511967	0.154153	0.272578	0.535199	1	0.344588	0.0701618	0.405079	0.312443	0.431259	0.526382	0.0834031	0.159701	0.387264	0.426159	0.251184	0.0879815	0.511855	0.457461	0.633071	0.537232	0.142591	0.20649	0.117413	0.120067	0.329266	0.302183	0.098566	0.180894	0.34332
Signature_21	0.0832953	0.0335207	0.0653703	0.0588982	0.289911	0.054532	0.291469	0.144508	0.527955	0.323019	0.10538	0.24186	0.346541	0.0958864	0.146982	0.779633	0.0176832	0.237684	0.373958	0.480873	0.123779	0.0731626	0.252158	0.344588	1	0.0714286	0.157119	0.105539	0.370458	0.890107	0.0596486	0.124093	0.176709	0.211764	0.144517	0.0476869	0.358952	0.0899662	0.489359	0.224798	0.0782342	0.108615	0.116422	0.501018	0.143912	0.295105	0.0191992	0.112746	0.202593
Signature_22	0.0551758	0.0282597	0.0285144	0.0481095	0.0691832	0.014137	0.288358	0.324146	0.281526	0.0543723	0.0345086	0.370315	0.200327	0.0231583	0.0374194	0.135778	0.00882053	0.046366	0.059449	0.261791	0.0648764	0.0742236	0.097205	0.0701618	0.0714286	1	0.0392932	0.105547	0.728342	0.0949164	0.421122	0.0832417	0.0766823	0.12256	0.0255721	0.0104807	0.321615	0.301733	0.190971	0.0344231	0.0224822	0.0460945	0.17627	0.0454424	0.460481	0.170159	0.0184179	0.0157023	0.0770725
Signature_23	0.0582365	0.0126515	0.0728511	0.0543498	0.291736	0.127671	0.277939	0.218279	0.443735	0.413302	0.478764	0.174244	0.170876	0.0622047	0.821894	0.20609	0.0296478	0.423153	0.489073	0.274999	0.0617723	0.0663289	0.895669	0.405079	0.157119	0.0392932	1	0.134826	0.211232	0.168086	0.0768298	0.0302043	0.0999164	0.665954	0.060926	0.103748	0.38513	0.134923	0.461818	0.464233	0.334413	0.689138	0.0737769	0.0912646	0.0964737	0.157958	0.0188235	0.0924993	0.0946444
Signature_24	0.623592	0.714864	0.44499	0.603421	0.226719	0.175097	0.555593	0.832964	0.469985	0.274584	0.138525	0.640932	0.322232	0.231808	0.142981	0.241012	0.147078	0.42907	0.306268	0.400095	0.0727548	0.722028	0.276159	0.312443	0.105539	0.105547	0.134826	1	0.363352	0.154052	0.102463	0.0501234	0.848589	0.245965	0.0567033	0.146131	0.548465	0.773685	0.396137	0.180356	0.151103	0.10014	0.0813125	0.088867	0.642006	0.220741	0.221537	0.106867	0.348111
Signature_25	0.342524	0.290805	0.173894	0.339644	0.380339	0.175893	0.687385	0.583591	0.734563	0.361552	0.189073	0.721416	0.554628	0.280806	0.226453	0.529563	0.192105	0.365536	0.30316	0.661517	0.234239	0.37893	0.390995	0.431259	0.370458	0.728342	0.211232	0.363352	1	0.475523	0.390903	0.225523	0.413076	0.388984	0.19774	0.132098	0.706012	0.519695	0.655083	0.277531	0.159553	0.204527	0.308046	0.243164	0.660446	0.466797	0.219016	0.199783	0.415109
Signature_26	0.157002	0.0778096	0.107803	0.113556	0.33668	0.102926	0.431639	0.230606	0.70917	0.403416	0.141373	0.359407	0.488578	0.12236	0.179696	0.918136	0.0783239	0.314203	0.415319	0.716717	0.20259	0.123588	0.321232	0.526382	0.890107	0.0949164	0.168086	0.154052	0.475523	1	0.0903935	0.21135	0.242941	0.254098	0.160392	0.0853149	0.488564	0.171622	0.694764	0.250491	0.121129	0.13838	0.150379	0.423938	0.212838	0.419974	0.0410263	0.128325	0.281682
Signature_27	0.0605782	0.0577544	0.0372815	0.0709656	0.0878484	0.0665624	0.190444	0.150998	0.197329	0.0836809	0.0660313	0.227052	0.155494	0.0432528	0.0779188	0.0976779	0.0303138	0.0835784	0.0907	0.15655	0.0317485	0.0797166	0.119568	0.0834031	0.0596486	0.421122	0.0768298	0.102463	0.390903	0.0903935	1	0.032003	0.0949676	0.151029	0.0350223	0.0611725	0.191851	0.172725	0.165384	0.0798186	0.0651712	0.0695276	0.0587573	0.0401083	0.242033	0.133677	0.0339805	0.0368668	0.071532
Signature_28	0.0422892	0.0165382	0.0159137	0.0504796	0.0901008	0.0435304	0.285945	0.0806843	0.315698	0.125185	0.0505065	0.190185	0.647474	0.161695	0.0446641	0.260727	0.0175104	0.080286	0.0959836	0.347911	0.650647	0.0525436	0.0819982	0.159701	0.124093	0.0832417	0.0302043	0.0501234	0.225523	0.21135	0.032003	1	0.0760893	0.122147	0.0276758	0.0406067	0.269752	0.0594267	0.277057	0.0467355	0.0440818	0.0477498	0.185882	0.05788	0.107886	0.665862	0.0329356	0.161905	0.218622
Signature_29	0.685949	0.779227	0.422511	0.653424	0.373461	0.118854	0.546548	0.81963	0.522913	0.354848	0.0934675	0.762293	0.39837	0.312354	0.114842	0.302214	0.0663474	0.498851	0.295226	0.440785	0.0883409	0.818395	0.271157	0.387264	0.176709	0.0766823	0.0999164	0.848589	0.413076	0.242941	0.0949676	0.0760893	1	0.204478	0.212326	0.0982153	0.529417	0.779773	0.436657	0.223126	0.0812443	0.100468	0.0815972	0.131655	0.723329	0.257457	0.279681	0.173835	0.444697
Signature_30	0.0761758	0.0658715	0.20992	0.0977448	0.427347	0.553218	0.421359	0.268797	0.590708	0.434094	0.763654	0.294566	0.306285	0.12152	0.817527	0.307835	0.130139	0.452951	0.404031	0.417812	0.182425	0.149435	0.685256	0.426159	0.211764	0.12256	0.665954	0.245965	0.388984	0.254098	0.151029	0.122147	0.204478	1	0.169767	0.531276	0.455034	0.179456	0.640337	0.486508	0.737235	0.737313	0.120402	0.159037	0.165548	0.263985	0.0208824	0.214208	0.141892
SBS1	0.0230951	0.0236192	0.0844649	0.116089	0.931799	0.0338451	0.0692807	0.0516263	0.216587	0.696616	0.0772292	0.183323	0.127864	0.168924	0.0613315	0.0450834	0.0099941	0.359672	0.380184	0.0574184	0.0576138	0.0785847	0.230941	0.251184	0.144517	0.0255721	0.060926	0.0567033	0.19774	0.160392	0.0350223	0.0276758	0.212326	0.169767	1	0.0192843	0.0547847	0.0239007	0.172565	0.722994	0.0439116	0.0601744	0.0235112	0.0139435	0.0390036	0.0660562	0.0128663	0.229658	0.0768031
SBS2	0.0300894	0.0132327	0.0592971	0.03506	0.127081	0.984466	0.133357	0.0559233	0.169061	0.0607563	0.52814	0.104673	0.0839983	0.104936	0.343815	0.110052	0.23468	0.119701	0.0751116	0.202814	0.0897344	0.0737174	0.19288	0.0879815	0.0476869	0.0104807	0.103748	0.146131	0.132098	0.0853149	0.0611725	0.0406067	0.0982153	0.531276	0.0192843	1	0.102324	0.0471827	0.26315	0.0714926	0.701211	0.293772	0.0652411	0.0860583	0.0463172	0.0552136	0.0199922	0.249551	0.0484021
SBS3	0.427168	0.3214	0.28713	0.343778	0.302378	0.164121	0.965049	0.722613	0.849124	0.355054	0.274872	0.785634	0.611368	0.171018	0.378203	0.607139	0.305998	0.413501	0.338169	0.769463	0.26315	0.423179	0.556122	0.511855	0.358952	0.321615	0.38513	0.548465	0.706012	0.488564	0.191851	0.269752	0.529417	0.455034	0.0547847	0.102324	1	0.64607	0.79428	0.24033	0.214311	0.346242	0.32986	0.258031	0.691649	0.527453	0.125385	0.11728	0.364416
SBS4	0.823744	0.692916	0.555661	0.660131	0.196489	0.0738451	0.609899	0.95915	0.490857	0.279637	0.109916	0.800781	0.366463	0.273142	0.137066	0.273356	0.0885744	0.465019	0.204221	0.443424	0.0698142	0.731062	0.294971	0.457461	0.0899662	0.301733	0.134923	0.773685	0.519695	0.171622	0.172725	0.0594267	0.779773	0.179456	0.0239007	0.0471827	0.64607	1	0.391387	0.092063	0.0838218	0.144514	0.132489	0.0784973	0.825996	0.237743	0.29026	0.0932973	0.468565
SBS5	0.286664	0.220572	0.229419	0.287115	0.462129	0.308693	0.768621	0.496955	0.958904	0.504848	0.414557	0.642743	0.660592	0.258598	0.511408	0.763311	0.204039	0.468221	0.451098	0.908426	0.268493	0.328276	0.646573	0.633071	0.489359	0.190971	0.461818	0.396137	0.655083	0.694764	0.165384	0.277057	0.436657	0.640337	0.172565	0.26315	0.79428	0.391387	1	0.429254	0.368546	0.438154	0.261202	0.321553	0.448085	0.574799	0.144067	0.267202	0.391398
SBS6	0.0826018	0.0350197	0.127349	0.121992	0.825022	0.094439	0.229388	0.154272	0.429273	0.937351	0.18198	0.228256	0.19786	0.165561	0.359923	0.164475	0.0256061	0.641891	0.788782	0.197267	0.0777645	0.102641	0.570116	0.537232	0.224798	0.0344231	0.464233	0.180356	0.277531	0.250491	0.0798186	0.0467355	0.223126	0.486508	0.722994	0.0714926	0.24033	0.092063	0.429254	1	0.135243	0.184088	0.0379933	0.0684773	0.0762368	0.14379	0.0280753	0.223209	0.117956
SBS7a	0.0367092	0.0325994	0.277217	0.045537	0.210429	0.708236	0.209683	0.111494	0.307697	0.118628	0.955922	0.11961	0.127462	0.154392	0.683303	0.15042	0.165336	0.208415	0.140655	0.242458	0.108989	0.0910275	0.395736	0.142591	0.0782342	0.0224822	0.334413	0.151103	0.159553	0.121129	0.0651712	0.0440818	0.0812443	0.737235	0.0439116	0.701211	0.214311	0.0838218	0.368546	0.135243	1	0.740485	0.094825	0.0767156	0.0511281	0.100206	0.0155184	0.314346	0.0740756
SBS7b	0.0590717	0.0370828	0.246176	0.060174	0.265641	0.315011	0.27096	0.206781	0.410244	0.167449	0.888162	0.17091	0.179784	0.157489	0.876093	0.202136	0.0552043	0.254801	0.164412	0.293869	0.1142	0.0928861	0.65687	0.20649	0.108615	0.0460945	0.689138	0.10014	0.204527	0.13838	0.0695276	0.0477498	0.100468	0.737313	0.0601744	0.293772	0.346242	0.144514	0.438154	0.184088	0.740485	1	0.0982452	0.126345	0.0900819	0.15272	0.0211644	0.309507	0.107224
SBS7c	0.0906898	0.0457778	0.068947	0.0810622	0.0936544	0.0771779	0.327743	0.147724	0.309328	0.0721284	0.108953	0.377134	0.347378	0.0537559	0.0908055	0.26837	0.0662821	0.0911947	0.0607414	0.276092	0.146366	0.0771857	0.154732	0.117413	0.116422	0.17627	0.0737769	0.0813125	0.308046	0.150379	0.0587573	0.185882	0.0815972	0.120402	0.0235112	0.0652411	0.32986	0.132489	0.261202	0.0379933	0.094825	0.0982452	1	0.186954	0.373285	0.354351	0.0294793	0.0375297	0.166703
SBS7d	0.0861739	0.0298441	0.0424235	0.0636351	0.127067	0.0907616	0.225022	0.105192	0.347271	0.0986217	0.105968	0.215374	0.271486	0.0692499	0.124107	0.436708	0.0246357	0.121502	0.127574	0.323672	0.103429	0.0710706	0.197476	0.120067	0.501018	0.0454424	0.0912646	0.088867	0.243164	0.423938	0.0401083	0.05788	0.131655	0.159037	0.0139435	0.0860583	0.258031	0.0784973	0.321553	0.0684773	0.0767156	0.126345	0.186954	1	0.145051	0.233854	0.0230442	0.0963014	0.150949
SBS8	0.615337	0.568201	0.334536	0.547873	0.203647	0.0655114	0.683754	0.826637	0.566027	0.209324	0.0675004	0.941588	0.440783	0.245624	0.0970465	0.323877	0.0578851	0.384598	0.195027	0.513443	0.112631	0.623641	0.282444	0.329266	0.143912	0.460481	0.0964737	0.642006	0.660446	0.212838	0.242033	0.107886	0.723329	0.165548	0.0390036	0.0463172	0.691649	0.825996	0.448085	0.0762368	0.0511281	0.0900819	0.373285	0.145051	1	0.314493	0.262547	0.0821195	0.466978
SBS9	0.24361	0.211543	0.092676	0.291246	0.221252	0.0783669	0.524388	0.281736	0.631209	0.233305	0.128777	0.467303	0.975509	0.307273	0.158744	0.501529	0.0802622	0.243765	0.233954	0.633087	0.599941	0.264284	0.2819	0.302183	0.295105	0.170159	0.157958	0.220741	0.466797	0.419974	0.133677	0.665862	0.257457	0.263985	0.0660562	0.0552136	0.527453	0.237743	0.574799	0.14379	0.100206	0.15272	0.354351	0.233854	0.314493	1	0.234753	0.178892	0.48963
SBS10a	0.591379	0.55051	0.0483642	0.749469	0.106041	0.0499468	0.186951	0.29975	0.212595	0.0637719	0.0185735	0.359954	0.301186	0.858734	0.0246635	0.0563947	0.0581965	0.29798	0.109829	0.161036	0.0294538	0.578574	0.0752842	0.098566	0.0191992	0.0184179	0.0188235	0.221537	0.219016	0.0410263	0.0339805	0.0329356	0.279681	0.0208824	0.0128663	0.0199922	0.125385	0.29026	0.144067	0.0280753	0.0155184	0.0211644	0.0294793	0.0230442	0.262547	0.234753	1	0.222406	0.88605
SBS10b	0.146223	0.122663	0.0693227	0.18364	0.36485	0.271425	0.138492	0.108652	0.211596	0.233818	0.389718	0.172326	0.213172	0.676526	0.219006	0.0874685	0.0466689	0.197092	0.14673	0.169122	0.118261	0.175387	0.166899	0.180894	0.112746	0.0157023	0.0924993	0.106867	0.199783	0.128325	0.0368668	0.161905	0.173835	0.214208	0.229658	0.249551	0.11728	0.0932973	0.267202	0.223209	0.314346	0.309507	0.0375297	0.0963014	0.0821195	0.178892	0.222406	1	0.260894
SBS10c	0.709088	0.629385	0.21076	0.809271	0.239995	0.082337	0.403121	0.474872	0.489797	0.237848	0.0928465	0.597669	0.580604	0.808802	0.108355	0.322503	0.0744114	0.455025	0.233265	0.431477	0.226103	0.656141	0.215534	0.34332	0.202593	0.0770725	0.0946444	0.348111	0.415109	0.281682	0.071532	0.218622	0.444697	0.141892	0.0768031	0.0484021	0.364416	0.468565	0.391398	0.117956	0.0740756	0.107224	0.166703	0.150949	0.466978	0.48963	0.88605	0.260894	1
SBS10d	0.659323	0.625589	0.188861	0.874881	0.12539	0.0549811	0.253278	0.407221	0.282593	0.0725176	0.0251197	0.454187	0.382714	0.763588	0.0268217	0.106835	0.0944499	0.271336	0.109162	0.2259	0.0482917	0.637255	0.0899882	0.121118	0.0351667	0.0383482	0.0218413	0.321637	0.247433	0.0692277	0.0478588	0.052742	0.360366	0.0330629	0.00779358	0.016088	0.195844	0.401996	0.191893	0.0216505	0.0192965	0.0307047	0.060556	0.0443955	0.369726	0.302152	0.888858	0.194772	0.879088
SBS11	0.0627028	0.0252452	0.181736	0.0496571	0.253296	0.318778	0.288039	0.174664	0.426417	0.30671	0.681899	0.195272	0.174011	0.0982372	0.97044	0.175216	0.0524354	0.418104	0.372729	0.275267	0.0834772	0.069228	0.669344	0.336032	0.135532	0.0280345	0.756806	0.127275	0.208416	0.172801	0.0699657	0.0384571	0.101249	0.744892	0.0396707	0.308487	0.34579	0.115348	0.487847	0.348079	0.602316	0.766843	0.0786991	0.130668	0.0914539	0.145858	0.0257092	0.214789	0.101977
SBS12	0.110414	0.037743	0.0456484	0.0793792	0.170545	0.0482552	0.393654	0.174082	0.663351	0.189303	0.0541547	0.317043	0.498436	0.0676663	0.051968	0.946319	0.0305446	0.114354	0.206908	0.763396	0.189525	0.0865872	0.187834	0.389826	0.722675	0.0858974	0.0386993	0.104274	0.422873	0.881788	0.0580954	0.204146	0.184824	0.123845	0.0180662	0.0400732	0.458225	0.121875	0.661078	0.0572476	0.0431676	0.0619088	0.222411	0.416886	0.187546	0.45028	0.0269395	0.0533031	0.255207
SBS13	0.104135	0.0974307	0.0700655	0.15612	0.0457591	0.180044	0.386072	0.127536	0.124943	0.0166671	0.0172204	0.132004	0.0980083	0.0805547	0.0164007	0.0385331	0.971225	0.0347093	0.0288714	0.174375	0.0142075	0.117984	0.0681157	0.0219005	0.00674574	0.00769137	0.0123129	0.135831	0.180933	0.0617083	0.0188374	0.00865104	0.0666965	0.0213419	0.00729478	0.0157671	0.300858	0.104228	0.16699	0.0143586	0.0164495	0.0148411	0.0533503	0.0144851	0.0680179	0.0821642	0.0933294	0.020359	0.105822
SBS14	0.739659	0.685026	0.368245	0.582427	0.182695	0.0281656	0.330584	0.524114	0.322382	0.34736	0.0224616	0.521235	0.27963	0.458905	0.0519562	0.169453	0.0307882	0.780793	0.243223	0.246901	0.0399847	0.551312	0.162518	0.563331	0.117236	0.0351851	0.0516981	0.407104	0.281239	0.194712	0.0442234	0.0371877	0.521256	0.0863778	0.0745348	0.0109796	0.304426	0.567271	0.240801	0.123353	0.0153173	0.0254034	0.070696	0.0586162	0.469269	0.192795	0.497581	0.134545	0.609599
SBS15	0.223206	0.155925	0.150077	0.210284	0.631467	0.106881	0.218305	0.212799	0.375503	0.843961	0.144187	0.24901	0.209106	0.153862	0.28741	0.179224	0.0430835	0.668997	0.926101	0.200623	0.0642563	0.202314	0.505349	0.43056	0.219684	0.0355731	0.414943	0.272983	0.23832	0.269971	0.0754519	0.0557654	0.270492	0.352634	0.535207	0.0914864	0.24078	0.192284	0.334005	0.847411	0.126384	0.130714	0.0411313	0.0810059	0.146778	0.152476	0.0699236	0.135604	0.173473
SBS16	0.129653	0.0879555	0.0575706	0.122319	0.153352	0.093445	0.376779	0.212852	0.563255	0.128025	0.074109	0.357976	0.418745	0.0799831	0.0911352	0.478706	0.116251	0.103377	0.128758	0.778699	0.0873076	0.136327	0.231051	0.243048	0.209815	0.120538	0.0836994	0.155688	0.348869	0.468144	0.081276	0.111679	0.202343	0.113915	0.0253066	0.0690768	0.39674	0.180558	0.636589	0.0596744	0.0654238	0.0928923	0.100941	0.133171	0.250033	0.360431	0.0531962	0.0798429	0.204341
SBS17a	0.0253567	0.00374553	0.00240082	0.0228406	0.0579184	0.00422504	0.214915	0.0833104	0.273807	0.059284	0.0175567	0.183286	0.28994	0.0145894	0.00991465	0.368009	0.0056281	0.0351803	0.0546704	0.314378	0.403671	0.0234408	0.0571171	0.174234	0.149385	0.0860208	0.00655536	0.0321661	0.193949	0.235733	0.02465	0.147672	0.0425935	0.0177355	0.00654399	0.00173678	0.249598	0.0520213	0.210431	0.0162029	0.00675875	0.0225391	0.20881	0.127375	0.133045	0.305981	0.00260057	0.00558695	0.12011
SBS17b	0.0137402	0.00407712	0.00117662	0.0113125	0.0228959	0.00210131	0.126052	0.0170755	0.140849	0.0574171	0.00694604	0.0692548	0.487095	0.0789484	0.00497745	0.0651672	0.00397232	0.0409792	0.0450316	0.185894	0.919499	0.0202597	0.01802	0.0280494	0.0238396	0.0124984	0.00161833	0.0198695	0.0912859	0.0609551	0.00701226	0.642142	0.0225751	0.0590704	0.00186693	0.00157397	0.106243	0.0134227	0.0956489	0.0084965	0.00224208	0.00467709	0.0431916	0.0154968	0.0190058	0.498075	0.012009	0.0467309	0.160081
SBS18	0.850705	0.940478	0.42564	0.926699	0.269074	0.098532	0.484532	0.75378	0.462643	0.246922	0.109918	0.717299	0.423594	0.581985	0.112139	0.206294	0.101838	0.474146	0.244018	0.369799	0.0841355	0.991269	0.235314	0.297934	0.0798161	0.0725286	0.10022	0.718805	0.396171	0.131365	0.0866394	0.0678244	0.817989	0.178352	0.10136	0.0623132	0.44197	0.736501	0.356896	0.148415	0.0953315	0.109409	0.102341	0.0760363	0.642923	0.297232	0.630168	0.191472	0.71449
SBS19	0.0513355	0.0148101	0.0563499	0.0632274	0.251052	0.252872	0.317005	0.240774	0.444162	0.290224	0.472414	0.226422	0.192795	0.0687912	0.626232	0.244762	0.0608457	0.32537	0.29886	0.334672	0.0936638	0.0758087	0.895641	0.321557	0.109893	0.0394138	0.812832	0.136554	0.237874	0.14527	0.0741281	0.0499234	0.101688	0.600399	0.0366507	0.226846	0.389474	0.153011	0.4634	0.330668	0.363592	0.647828	0.0948435	0.12912	0.129373	0.174547	0.0210719	0.118584	0.0983438
SBS20	0.571234	0.341282	0.449923	0.247767	0.223855	0.0399176	0.352274	0.50313	0.368801	0.542314	0.08664	0.416718	0.237925	0.0690557	0.17793	0.263327	0.0196734	0.705709	0.347736	0.284755	0.0689085	0.266523	0.313204	0.784421	0.153509	0.0542472	0.215958	0.297264	0.278647	0.26949	0.0537472	0.0687368	0.356372	0.237883	0.0910466	0.0291441	0.399845	0.585208	0.335955	0.302685	0.0671099	0.100689	0.12622	0.0729016	0.370203	0.166906	0.0334936	0.0514632	0.273366
SBS21	0.0847672	0.0503047	0.0446785	0.0466297	0.145232	0.0127895	0.214893	0.112142	0.397694	0.1784	0.0290676	0.172777	0.27094	0.056008	0.048377	0.708097	0.0107708	0.166803	0.252792	0.375963	0.0739177	0.0621348	0.126341	0.213726	0.952616	0.0333717	0.0545676	0.0793805	0.285004	0.816566	0.0345461	0.0871164	0.148562	0.09631	0.0321294	0.00964969	0.279078	0.0747287	0.351206	0.0766077	0.0146725	0.0347839	0.104151	0.488393	0.0988663	0.23372	0.0137692	0.051126	0.165834
SBS22	0.0373441	0.0150052	0.0113939	0.0313944	0.0518256	0.00920542	0.29116	0.292032	0.277737	0.034421	0.0194054	0.372396	0.222441	0.00779685	0.0206332	0.138047	0.0137264	0.0244871	0.0461149	0.267586	0.057656	0.0609804	0.0833797	0.056051	0.0608457	0.965471	0.0203477	0.0980646	0.703963	0.0942727	0.594097	0.0842314	0.0684193	0.106079	0.0113441	0.00626304	0.319256	0.283307	0.194552	0.0169786	0.0127184	0.0253501	0.198048	0.0418269	0.459798	0.195567	0.00461197	0.00839311	0.0560763
SBS23	0.0578648	0.012831	0.0731662	0.0548374	0.291284	0.13361	0.281608	0.220576	0.447083	0.407361	0.484815	0.177668	0.172547	0.0625591	0.825978	0.207754	0.0307623	0.420732	0.47791	0.278251	0.0633361	0.0672181	0.898409	0.403343	0.154214	0.0393747	0.999587	0.134515	0.213523	0.166937	0.076696	0.0308192	0.101192	0.673029	0.0593484	0.109488	0.388414	0.136578	0.466186	0.458798	0.339658	0.697873	0.0745803	0.0929868	0.0982448	0.159341	0.0188485	0.0944325	0.0951122
SBS24	0.500717	0.64936	0.343551	0.51573	0.249852	0.0626991	0.498854	0.770467	0.474306	0.347728	0.11591	0.591684	0.333364	0.190887	0.212682	0.238658	0.0797911	0.471135	0.399998	0.375764	0.089517	0.63492	0.320742	0.345693	0.136716	0.081563	0.233588	0.93495	0.342078	0.173927	0.0994038	0.076714	0.83038	0.27317	0.0711603	0.037789	0.501537	0.672733	0.405736	0.271057	0.0935133	0.130199	0.0861229	0.0824084	0.589629	0.240595	0.174495	0.0933301	0.309774
SBS25	0.3424	0.290839	0.173878	0.33953	0.380631	0.175929	0.687324	0.583489	0.734612	0.361832	0.189017	0.72145	0.554674	0.280695	0.226233	0.529702	0.192104	0.36568	0.303286	0.661577	0.234286	0.378934	0.390835	0.431497	0.370683	0.728392	0.210973	0.363279	0.999999	0.47583	0.39078	0.225616	0.413206	0.388877	0.198113	0.13215	0.705927	0.519594	0.655133	0.277704	0.159546	0.204338	0.307871	0.243358	0.660407	0.466819	0.218813	0.1998	0.415085
SBS26	0.0941849	0.0276385	0.0405453	0.0638497	0.188637	0.0271672	0.351246	0.157271	0.64488	0.24535	0.0451401	0.277289	0.501304	0.071171	0.050444	0.92219	0.0210607	0.139027	0.235465	0.718126	0.23809	0.0679729	0.18042	0.470051	0.767808	0.0665129	0.0437768	0.074732	0.408822	0.920139	0.0509988	0.241823	0.168203	0.110383	0.0453266	0.0204493	0.418912	0.100885	0.643285	0.0857085	0.0305743	0.0506505	0.178239	0.3831	0.144621	0.451839	0.0203617	0.061055	0.253313
SBS27	0.0605372	0.0577457	0.0372499	0.0709309	0.0877521	0.0666071	0.190313	0.150907	0.197167	0.0835472	0.0659878	0.22695	0.15538	0.0432254	0.0778232	0.0975839	0.0303104	0.0834611	0.0905586	0.156437	0.03172	0.0797041	0.119439	0.0832762	0.059571	0.42109	0.0766911	0.10237	0.390805	0.0903239	1	0.0319834	0.0949131	0.150879	0.0349886	0.0612284	0.191725	0.172656	0.165234	0.0796791	0.0651637	0.069443	0.0587156	0.0400797	0.241949	0.13357	0.0339591	0.0368497	0.0714771
SBS28	0.0257934	0.0146276	0.0153254	0.04587	0.0460528	0.0152221	0.160034	0.0286694	0.161756	0.0615451	0.020743	0.0926289	0.509318	0.155873	0.018649	0.0526403	0.00862497	0.0382386	0.0351566	0.177371	0.395553	0.0299558	0.0310576	0.0285896	0.0180519	0.00930066	0.0117889	0.0227377	0.0891193	0.0422238	0.0064288	0.903734	0.0470043	0.0524702	0.0155652	0.0136344	0.136396	0.0235463	0.144532	0.0201589	0.0173058	0.0194618	0.0980479	0.0186765	0.0329893	0.540601	0.0296051	0.176779	0.147086
SBS29	0.693602	0.843889	0.438634	0.676877	0.279065	0.0606229	0.488868	0.827525	0.422064	0.295739	0.0506702	0.710786	0.325339	0.272523	0.0612873	0.19484	0.0582596	0.493568	0.263613	0.337335	0.0558678	0.837744	0.206009	0.338586	0.0816099	0.0606478	0.0629312	0.882798	0.341915	0.130528	0.0872049	0.0371403	0.969215	0.140579	0.138184	0.0405389	0.470609	0.790423	0.325888	0.165116	0.039832	0.0525483	0.0644994	0.0518862	0.707544	0.199512	0.257471	0.127523	0.405776
SBS30	0.0593626	0.029456	0.211507	0.0725516	0.354187	0.480896	0.351686	0.224532	0.509152	0.347537	0.767596	0.217809	0.208486	0.0979412	0.838403	0.23473	0.1128	0.390725	0.310037	0.341551	0.126952	0.103967	0.650625	0.365144	0.13449	0.0438677	0.678512	0.174511	0.287171	0.175912	0.0987644	0.0751932	0.137135	0.966512	0.108199	0.456636	0.390755	0.143916	0.573661	0.417987	0.719946	0.771574	0.093992	0.105446	0.0952253	0.173503	0.018176	0.182701	0.0990658
SBS31	0.172708	0.125625	0.145488	0.13683	0.257379	0.11969	0.425648	0.402177	0.518281	0.219768	0.474662	0.397853	0.29088	0.0836711	0.647817	0.332429	0.0437684	0.296589	0.184157	0.429369	0.127843	0.177921	0.768298	0.321448	0.161875	0.20999	0.776338	0.211354	0.386204	0.224488	0.158113	0.10162	0.245288	0.540975	0.0563471	0.0938505	0.533886	0.335096	0.5014	0.185688	0.311154	0.729681	0.187245	0.0997846	0.340615	0.256854	0.0335378	0.0923999	0.171301
SBS32	0.134883	0.091933	0.13225	0.149745	0.38585	0.277619	0.404534	0.283173	0.514078	0.400785	0.358824	0.395748	0.243493	0.134031	0.694043	0.242081	0.060826	0.469281	0.346798	0.339015	0.0957602	0.159734	0.590502	0.404889	0.190885	0.0557924	0.548667	0.210532	0.343819	0.238688	0.0903889	0.0523527	0.250023	0.668882	0.185244	0.259569	0.414147	0.209653	0.571344	0.449227	0.331959	0.417144	0.0847959	0.195079	0.246351	0.182271	0.0699175	0.191885	0.165432
SBS33	0.0928428	0.0456246	0.0388586	0.0796742	0.111968	0.0593366	0.193259	0.10594	0.314567	0.154601	0.0395342	0.130431	0.209506	0.0707334	0.0399908	0.473998	0.0786655	0.0909727	0.117981	0.321436	0.0645365	0.0800016	0.108291	0.319283	0.39855	0.0266094	0.0284401	0.0594404	0.200998	0.389266	0.025795	0.116657	0.0988209	0.105773	0.0303559	0.0456494	0.219842	0.0715755	0.316241	0.0574053	0.0379651	0.0385216	0.0722714	0.106887	0.0729985	0.169085	0.0433065	0.0339858	0.167045
SBS34	0.0235867	0.011599	0.0142092	0.0363799	0.0760368	0.00803594	0.155451	0.0764115	0.183029	0.0496641	0.016856	0.273397	0.236155	0.00821774	0.0137198	0.085924	0.0104293	0.0255286	0.0596622	0.13645	0.0155366	0.0434561	0.0515823	0.0451274	0.0544707	0.22811	0.010215	0.0261022	0.265268	0.052378	0.243121	0.0300992	0.0523749	0.0845944	0.0338328	0.00619607	0.136282	0.0932187	0.126464	0.0352892	0.0132173	0.0304343	0.256259	0.112893	0.251337	0.230824	0.0102641	0.0127586	0.225402
SBS35	0.461263	0.37693	0.324891	0.307479	0.182545	0.0824974	0.577121	0.682826	0.462745	0.274938	0.25212	0.632928	0.302385	0.128969	0.371605	0.219739	0.139317	0.476552	0.228425	0.389345	0.112573	0.36269	0.469867	0.42823	0.095033	0.479272	0.430894	0.484263	0.571384	0.160492	0.315189	0.0987236	0.490086	0.319191	0.0193181	0.0486252	0.628777	0.673046	0.384813	0.13118	0.163343	0.385613	0.199326	0.0508039	0.677428	0.235296	0.109329	0.0691658	0.280141
SBS36	0.857751	0.888914	0.386355	0.987975	0.185589	0.0924729	0.389888	0.660014	0.379188	0.165838	0.0627863	0.612936	0.386927	0.699419	0.0659716	0.156342	0.127156	0.4591	0.180905	0.309188	0.0473807	0.878996	0.162134	0.25461	0.0483947	0.0498072	0.0539563	0.595452	0.331585	0.101707	0.0680949	0.0323258	0.632253	0.0943901	0.036471	0.0495597	0.338555	0.646693	0.274546	0.0629826	0.0561055	0.0671121	0.0697078	0.0561522	0.53747	0.277315	0.799799	0.185759	0.836562
SBS37	0.11141	0.041526	0.0447101	0.0902085	0.200821	0.0523204	0.498557	0.175105	0.66598	0.175619	0.068255	0.358354	0.638792	0.104496	0.0740249	0.765654	0.0359857	0.132147	0.19844	0.741692	0.273567	0.0963214	0.208129	0.274293	0.543835	0.0802972	0.0603516	0.122833	0.416176	0.707354	0.0609388	0.349016	0.187545	0.154038	0.0626111	0.0424652	0.521092	0.123869	0.648928	0.0868374	0.0515313	0.0807819	0.265376	0.422939	0.195527	0.619893	0.0348894	0.0958354	0.256809
SBS38	0.724909	0.452337	0.535735	0.395906	0.0911937	0.0324639	0.290228	0.513237	0.199096	0.218248	0.0383049	0.417121	0.171249	0.1017	0.0390994	0.144503	0.0305176	0.3323	0.128575	0.207483	0.0375804	0.495051	0.12584	0.374887	0.0441572	0.0386913	0.0284724	0.455551	0.204114	0.0993628	0.0313338	0.0337948	0.439083	0.0446927	0.0194539	0.0251575	0.328071	0.684331	0.150783	0.0508614	0.0328033	0.0389045	0.0472082	0.0578639	0.421823	0.0994486	0.0921732	0.0439409	0.241505
SBS39	0.195798	0.151181	0.140945	0.179689	0.209202	0.13376	0.853966	0.425197	0.580136	0.20798	0.101863	0.483479	0.404207	0.108866	0.134684	0.333836	0.499091	0.197376	0.192626	0.4964	0.158124	0.237735	0.27144	0.254661	0.202333	0.15861	0.125923	0.364949	0.454516	0.303034	0.11431	0.178071	0.293272	0.209851	0.0839651	0.049342	0.792744	0.338129	0.558077	0.149034	0.0812457	0.116205	0.203146	0.150344	0.362891	0.370439	0.0681665	0.0862064	0.193044
SBS40	0.528135	0.449056	0.357433	0.516323	0.330126	0.401488	0.900085	0.706131	0.865432	0.343514	0.417119	0.80472	0.707671	0.323525	0.461657	0.57091	0.356325	0.460964	0.332174	0.803779	0.326223	0.556037	0.578237	0.495542	0.289365	0.187273	0.388229	0.593542	0.629423	0.449045	0.144055	0.378599	0.60043	0.584146	0.0439322	0.33707	0.884678	0.631469	0.839524	0.246859	0.401196	0.420607	0.367433	0.255198	0.663405	0.611733	0.271036	0.213534	0.510697
SBS41	0.108704	0.055755	0.056774	0.115991	0.209354	0.157979	0.513189	0.180188	0.514416	0.204807	0.119645	0.406077	0.655362	0.155176	0.124875	0.423998	0.322185	0.161255	0.200419	0.510089	0.218994	0.118323	0.230303	0.208787	0.23862	0.185165	0.107804	0.128606	0.447728	0.323633	0.127832	0.500853	0.153942	0.222656	0.0886014	0.102588	0.489151	0.149262	0.49092	0.154281	0.109432	0.122457	0.541548	0.248422	0.281822	0.662328	0.0656491	0.166199	0.315817
SBS42	0.334701	0.278115	0.227875	0.298889	0.301946	0.114783	0.467617	0.513787	0.579418	0.538002	0.333856	0.429037	0.314577	0.204996	0.650999	0.301876	0.0489006	0.611721	0.667981	0.414201	0.0876047	0.298308	0.738182	0.57	0.240697	0.173579	0.760704	0.458777	0.410221	0.275822	0.190169	0.0690261	0.352291	0.571859	0.0338086	0.0891867	0.535175	0.430915	0.561343	0.523635	0.259138	0.410396	0.114273	0.137454	0.374457	0.260548	0.175914	0.144235	0.296634
SBS43	0.055477	0.0400406	0.0254987	0.0527894	0.045041	0.003805	0.314876	0.091658	0.201738	0.043803	0.00937499	0.187281	0.205799	0.0208429	0.00915511	0.192269	0.00465037	0.0397601	0.0862522	0.174584	0.151267	0.10886	0.0596313	0.107324	0.0814587	0.0324705	0.00535216	0.0815927	0.180578	0.146943	0.0502008	0.15544	0.118686	0.0617405	0.00917294	0.00199353	0.261408	0.0841469	0.17076	0.0113156	0.00368736	0.0150319	0.0627859	0.0377089	0.131281	0.199469	0.00697464	0.0122226	0.0681172
SBS44	0.343577	0.212321	0.225192	0.219756	0.399412	0.0406863	0.438883	0.370738	0.604403	0.745449	0.0722872	0.411996	0.3627	0.147709	0.308759	0.453847	0.0299922	0.746789	0.645669	0.43299	0.0928679	0.197215	0.520141	0.820405	0.367909	0.0674858	0.410099	0.276211	0.408433	0.462637	0.0968493	0.127143	0.294675	0.459247	0.181566	0.016647	0.465203	0.340952	0.603424	0.657417	0.0504036	0.0891998	0.180382	0.180016	0.279442	0.301003	0.115113	0.0911579	0.324759
SBS45	0.834459	0.568621	0.611667	0.552078	0.11101	0.0282869	0.337165	0.678593	0.232677	0.264301	0.0203206	0.501318	0.202626	0.211389	0.0223876	0.152323	0.0528081	0.429332	0.141708	0.230917	0.0183123	0.570107	0.135468	0.462025	0.0362955	0.0455913	0.0155308	0.532341	0.231742	0.103572	0.0339784	0.0156605	0.498906	0.0223415	0.0193537	0.0123162	0.379394	0.830361	0.166621	0.0485774	0.0149053	0.0235375	0.0567834	0.0494578	0.511865	0.114063	0.224762	0.0628253	0.37891
SBS46	0.169618	0.103112	0.126713	0.146723	0.224786	0.11454	0.449136	0.254083	0.639841	0.240496	0.162899	0.3671	0.488103	0.0893154	0.158994	0.826556	0.0656415	0.205739	0.263584	0.648865	0.332827	0.165729	0.266725	0.444446	0.607086	0.0873314	0.139193	0.188495	0.414573	0.721211	0.0948524	0.229533	0.233704	0.276287	0.0567871	0.0976115	0.496064	0.200164	0.588062	0.131133	0.138175	0.169971	0.222828	0.438664	0.237206	0.451793	0.0385179	0.0610408	0.259078
SBS47	0.171199	0.116263	0.14236	0.14356	0.132224	0.226583	0.339659	0.246583	0.320696	0.0737486	0.228737	0.414483	0.350609	0.0700511	0.22057	0.180628	0.0472921	0.108004	0.1133	0.287081	0.138854	0.204989	0.170174	0.105109	0.0908617	0.209639	0.0786136	0.179478	0.341642	0.125694	0.339032	0.106106	0.285442	0.251784	0.0279148	0.227959	0.305436	0.267528	0.287243	0.0496156	0.230304	0.236473	0.154459	0.143922	0.361259	0.29752	0.0298396	0.150569	0.184837
SBS48	0.0844885	0.0930684	0.624126	0.135397	0.0224695	0.008905	0.0337055	0.104763	0.0581252	0.0141315	0.00197987	0.0515548	0.0311973	0.0242867	0.00248306	0.0222631	0.0228039	0.00353212	0.0167289	0.0476006	0.00786279	0.115692	0.0154378	0.0159127	0.00314468	0.00586222	0.00256656	0.110507	0.0136106	0.00679796	0.00746944	0.00144227	0.096449	0.0101356	0.00181927	0.000693919	0.0302473	0.110147	0.0340257	0.00331209	0.00108621	0.00347539	0.00443773	0.00678949	0.049672	0.0259672	0.0240082	0.00219659	0.0558412
SBS49	0.362185	0.226679	0.540081	0.223152	0.0405969	0.00523991	0.141372	0.281736	0.100165	0.0974105	0.00507315	0.204712	0.0714018	0.0354477	0.00734454	0.070468	0.0121211	0.0936444	0.0499275	0.103482	0.00583815	0.305832	0.0535898	0.158567	0.017017	0.0153384	0.00402872	0.318235	0.0896343	0.0296295	0.0127881	0.00473423	0.276295	0.0130443	0.00639103	0.00139211	0.16095	0.411655	0.0771689	0.0173274	0.00287639	0.00713208	0.0153507	0.0237612	0.220923	0.0410667	0.0339764	0.0101632	0.101855
SBS50	0.243702	0.195599	0.277723	0.202976	0.209026	0.312286	0.470144	0.416916	0.397952	0.12285	0.461534	0.530876	0.267594	0.104304	0.388547	0.212609	0.0673678	0.219855	0.15982	0.342111	0.120583	0.303912	0.290013	0.144682	0.0971327	0.0321648	0.154285	0.340823	0.240241	0.152297	0.0662197	0.0871909	0.52984	0.366894	0.058711	0.308419	0.431183	0.397762	0.378432	0.100088	0.462288	0.407548	0.0882161	0.104003	0.500571	0.169107	0.0442024	0.188994	0.164879
SBS51	0.242285	0.157144	0.170401	0.208698	0.192997	0.120215	0.459231	0.348374	0.408613	0.140588	0.08603	0.507737	0.323978	0.0679533	0.124933	0.268398	0.0517208	0.136671	0.110712	0.347033	0.116543	0.283491	0.19285	0.179443	0.114107	0.201257	0.0779161	0.246782	0.373487	0.163855	0.253605	0.122004	0.407383	0.19995	0.0742671	0.110089	0.417841	0.341733	0.363593	0.124668	0.0763648	0.115323	0.136435	0.103909	0.456094	0.234336	0.0348029	0.0971594	0.161585
SBS52	0.465243	0.44585	0.469698	0.655479	0.0985407	0.0413632	0.195357	0.367336	0.209331	0.0543941	0.0144485	0.325641	0.226944	0.216201	0.0167982	0.0907982	0.112459	0.0918956	0.0659246	0.170801	0.0206218	0.438626	0.0672184	0.0729369	0.0213536	0.0280411	0.0179996	0.317937	0.127584	0.0477267	0.0336802	0.0163853	0.285646	0.0213551	0.0128974	0.00661755	0.169917	0.38134	0.130234	0.0195487	0.00964037	0.0219735	0.0293228	0.050075	0.30165	0.160534	0.258811	0.039736	0.3784
SBS53	0.480758	0.269059	0.387971	0.264681	0.110293	0.0388308	0.276021	0.374861	0.219506	0.135572	0.0609762	0.313853	0.161788	0.0391197	0.0644589	0.181241	0.0299929	0.0885259	0.113148	0.232046	0.0472879	0.386341	0.147222	0.179763	0.0838931	0.0582422	0.0684506	0.420715	0.208276	0.112596	0.0482793	0.0523308	0.330129	0.0951228	0.0423995	0.031515	0.310094	0.492145	0.193194	0.0771416	0.0472761	0.0692536	0.0481687	0.0841012	0.307672	0.114583	0.011775	0.0445596	0.113254
SBS54	0.0741187	0.039933	0.04731	0.0654946	0.13935	0.00608926	0.232821	0.148883	0.445776	0.264187	0.0185827	0.175797	0.296231	0.0493314	0.0294318	0.603647	0.0126772	0.102626	0.166452	0.446379	0.131156	0.0770024	0.126325	0.564684	0.379182	0.04615	0.0317149	0.0668936	0.283663	0.562126	0.0358068	0.166639	0.148496	0.0885138	0.0486482	0.00145879	0.271558	0.0923047	0.475069	0.0955886	0.00801931	0.0265223	0.0579759	0.0787206	0.0989734	0.248831	0.0298607	0.0160976	0.182142
SBS55	0.038416	0.0207732	0.0154512	0.0367676	0.0623332	0.0537122	0.280459	0.0836478	0.185024	0.0615529	0.049507	0.159444	0.181345	0.0518252	0.0562744	0.0831317	0.0248099	0.0525189	0.0657539	0.134659	0.0711996	0.08008	0.0794813	0.0801837	0.0543417	0.0761427	0.0311832	0.05534	0.211098	0.0750861	0.0296546	0.142488	0.0737589	0.10529	0.0258715	0.0505727	0.229162	0.0734484	0.178701	0.0426137	0.0396999	0.0615603	0.0551133	0.0824745	0.105521	0.164946	0.0192536	0.0685903	0.0590989
SBS56	0.694441	0.641643	0.189982	0.8648	0.122556	0.0391189	0.249065	0.402625	0.274237	0.0952101	0.00824628	0.458038	0.365834	0.801581	0.00950357	0.0907569	0.0840489	0.341145	0.10867	0.217272	0.0323162	0.64239	0.0809107	0.168024	0.0247032	0.0368719	0.00885827	0.293588	0.250412	0.0683576	0.0428139	0.0563842	0.35986	0.0186174	0.0111484	0.00186066	0.18647	0.406301	0.185651	0.0238866	0.00374913	0.0131391	0.0454468	0.0322014	0.366826	0.28248	0.936445	0.194787	0.913849
SBS57	0.14668	0.0835455	0.0992095	0.156259	0.237388	0.164221	0.430007	0.217892	0.51825	0.206838	0.203763	0.376262	0.561327	0.167075	0.25115	0.425346	0.0925816	0.208838	0.167567	0.483766	0.221113	0.135296	0.310701	0.243314	0.223768	0.0935028	0.202969	0.137048	0.378396	0.316121	0.0842616	0.476522	0.189668	0.290109	0.108233	0.143741	0.441771	0.178942	0.516414	0.173931	0.1749	0.240736	0.433508	0.20512	0.246206	0.550952	0.0657772	0.185808	0.251691
SBS58	0.177356	0.0981844	0.0983102	0.15994	0.248503	0.441062	0.452204	0.278293	0.509444	0.187147	0.293783	0.433944	0.382042	0.175033	0.398241	0.343721	0.130706	0.242216	0.158749	0.53973	0.174166	0.183135	0.353181	0.247912	0.164123	0.110374	0.202499	0.172823	0.402746	0.26599	0.116698	0.15419	0.283356	0.433678	0.076901	0.430188	0.433812	0.237381	0.575046	0.194642	0.286656	0.367039	0.166833	0.193177	0.288898	0.30216	0.0996418	0.301296	0.218367
SBS59	0.179881	0.560834	0.0308366	0.25918	0.0511131	0.00507391	0.18288	0.287832	0.169074	0.0680646	0.00645097	0.251724	0.140514	0.0365332	0.0139352	0.067571	0.00742449	0.358474	0.162784	0.125379	0.0687807	0.419473	0.0632518	0.0946321	0.0315668	0.0137665	0.0117431	0.4648	0.134604	0.0440484	0.0360826	0.0389414	0.480185	0.0715229	0.00696936	0.00289377	0.161814	0.212512	0.12424	0.0177871	0.00412389	0.00936117	0.0227237	0.0154416	0.260413	0.121399	0.0250536	0.0136185	0.0887626
SBS60	0.00968494	0.00402131	0.00457512	0.0133024	0.0197659	0.0045815	0.175232	0.0216608	0.0776492	0.0186312	0.0108616	0.0689362	0.0879306	0.0132746	0.011125	0.0190042	0.00245722	0.0159135	0.0321986	0.030147	0.0446156	0.0508278	0.0339473	0.025374	0.00845785	0.0101746	0.00762121	0.0241325	0.0858592	0.0166523	0.0172966	0.0683745	0.0337975	0.0337135	0.00943378	0.00378397	0.124398	0.0224595	0.0684571	0.0113758	0.00536285	0.0154578	0.035302	0.0184635	0.0381973	0.0803884	0.00288657	0.0169822	0.0153199
SBS84	0.0850319	0.0518647	0.0703741	0.0772412	0.266377	0.079179	0.404946	0.229105	0.483129	0.5164	0.245985	0.245434	0.221346	0.0713328	0.557441	0.204637	0.0366818	0.51728	0.597271	0.28677	0.0543603	0.0856595	0.736932	0.503093	0.172513	0.0336084	0.69919	0.236229	0.24138	0.200211	0.0831627	0.0525621	0.155079	0.519249	0.0453702	0.0557214	0.424844	0.14484	0.492561	0.569745	0.189399	0.302269	0.0811342	0.154012	0.151267	0.21092	0.0318314	0.109228	0.116578
SBS85	0.0877526	0.0311163	0.0246962	0.0791847	0.134646	0.135517	0.39275	0.151452	0.488246	0.0812384	0.0964494	0.43051	0.50576	0.0793727	0.105703	0.472174	0.0557036	0.0924879	0.124144	0.498572	0.121374	0.0878824	0.164835	0.130819	0.388385	0.263427	0.0436779	0.0897786	0.466246	0.421701	0.315007	0.161312	0.135944	0.166806	0.020864	0.130859	0.391657	0.144036	0.45655	0.0356155	0.0894763	0.114026	0.512385	0.462922	0.35761	0.493529	0.0343317	0.108463	0.2492
SBS86	0.0948192	0.0836555	0.0719352	0.111728	0.180578	0.168324	0.612745	0.23325	0.338995	0.133838	0.086709	0.2621	0.197692	0.0918965	0.0891373	0.126509	0.560386	0.118876	0.11141	0.270279	0.0591751	0.135466	0.166977	0.111094	0.0976312	0.0431593	0.0628794	0.229865	0.257359	0.144351	0.0480966	0.0502569	0.153219	0.129479	0.116035	0.0732718	0.531334	0.165582	0.336003	0.113372	0.0798507	0.0814744	0.0835943	0.0780056	0.156594	0.178115	0.0547012	0.0928884	0.103559
SBS87	0.107212	0.0828034	0.228534	0.158625	0.766921	0.080039	0.268615	0.20786	0.35227	0.571722	0.157807	0.302665	0.252526	0.195665	0.134678	0.160693	0.0703518	0.282588	0.207788	0.213616	0.115386	0.173964	0.275088	0.321717	0.218481	0.11043	0.115198	0.151151	0.322071	0.209951	0.109537	0.0819722	0.281752	0.229657	0.759299	0.0538943	0.248388	0.165315	0.324251	0.570068	0.100157	0.161087	0.109731	0.0901277	0.17924	0.199153	0.0350778	0.26897	0.144184
SBS88	0.0790255	0.0498777	0.00876059	0.0986785	0.1586	0.0123037	0.334241	0.108635	0.476481	0.105928	0.0245887	0.358166	0.540574	0.134962	0.0180104	0.378551	0.0206881	0.0795374	0.112967	0.598483	0.110524	0.0915863	0.144835	0.134226	0.204207	0.115212	0.02057	0.0764996	0.333298	0.36115	0.0964483	0.360356	0.126514	0.0734249	0.0731328	0.00288448	0.335766	0.0855018	0.50959	0.0646084	0.012647	0.0281077	0.413067	0.212193	0.2526	0.54255	0.0651678	0.122793	0.238071
SBS89	0.41852	0.318308	0.271698	0.374666	0.293577	0.172454	0.837827	0.658177	0.706738	0.306258	0.183049	0.753129	0.493941	0.197429	0.292054	0.398193	0.313932	0.378548	0.249126	0.604845	0.162354	0.4305	0.4172	0.42327	0.195617	0.456327	0.25012	0.4723	0.727516	0.316373	0.33211	0.169219	0.49351	0.431877	0.0877567	0.109052	0.805043	0.609028	0.682935	0.251782	0.15891	0.213481	0.209368	0.154791	0.660998	0.395615	0.177599	0.112208	0.339106
SBS90	0.0280252	0.00887454	0.00673736	0.0302851	0.0433303	0.0109591	0.186176	0.0878005	0.173807	0.0142892	0.0157011	0.279725	0.251201	0.0141888	0.00950056	0.0922389	0.00848095	0.0143537	0.0183249	0.145708	0.0707529	0.0373029	0.0504646	0.0237767	0.0351054	0.327622	0.00494356	0.0230294	0.355422	0.0428632	0.428538	0.0709662	0.0284869	0.0570269	0.0154208	0.0098551	0.172247	0.111658	0.119478	0.0064498	0.0103638	0.0169563	0.439582	0.0813176	0.28567	0.25861	0.010902	0.0176184	0.0804709
SBS91	0.364595	0.368783	0.575372	0.557137	0.101044	0.0983812	0.173933	0.322458	0.2029	0.0481292	0.0456193	0.276997	0.194787	0.233669	0.0277989	0.0775162	0.105157	0.0870297	0.0614135	0.160724	0.0246292	0.376401	0.0799057	0.0562508	0.0104177	0.0222198	0.0325167	0.278956	0.118514	0.0314891	0.0356046	0.012562	0.264781	0.0857069	0.0115662	0.0671055	0.143808	0.307151	0.138954	0.0345939	0.0517509	0.0366425	0.0261941	0.0362871	0.250111	0.143747	0.275745	0.0476469	0.355215
SBS92	0.313213	0.228804	0.225932	0.286443	0.373304	0.258126	0.647869	0.510789	0.853254	0.37308	0.364245	0.583679	0.542322	0.171908	0.460442	0.730288	0.259083	0.374026	0.326006	0.887632	0.154363	0.309765	0.644367	0.518902	0.446525	0.219475	0.473238	0.359752	0.615394	0.660081	0.170656	0.135811	0.400706	0.521273	0.109154	0.201937	0.709297	0.435654	0.884098	0.284696	0.297695	0.459349	0.210384	0.283353	0.434109	0.444385	0.124627	0.152932	0.356903
SBS93	0.211798	0.129742	0.125657	0.186853	0.289028	0.143588	0.593645	0.305637	0.626691	0.257677	0.142448	0.497566	0.773232	0.193442	0.144751	0.5317	0.232788	0.226771	0.207247	0.649377	0.416281	0.191205	0.270628	0.267088	0.30598	0.245049	0.117107	0.212473	0.535459	0.424197	0.164873	0.525329	0.272793	0.24678	0.145767	0.0996595	0.599099	0.273325	0.581522	0.176449	0.123984	0.148664	0.430796	0.262164	0.384445	0.748665	0.0941574	0.191332	0.339319
SBS94	0.644113	0.4742	0.473411	0.468049	0.389404	0.158344	0.683877	0.815442	0.625835	0.44135	0.264852	0.771866	0.461738	0.153299	0.329648	0.426097	0.152419	0.474127	0.337511	0.57278	0.159106	0.547914	0.48443	0.531317	0.217717	0.206032	0.301513	0.672767	0.533012	0.327889	0.188341	0.125578	0.651203	0.352494	0.201746	0.12335	0.748406	0.855232	0.566903	0.285464	0.220647	0.304458	0.271099	0.218509	0.726754	0.358711	0.102979	0.12153	0.358977
[truncated: 63 more columns]

## Sheet: README 
Supplemental Table S4. Cosine similarity Each value indicates the cosine similarity between factors in rows and columns. Y4tumor: Total somatic mutations detected in four KBrO3-treated Mutyh−/− tumors (in this study). TOY: De novo germline mutations in the TOY mouse line (Ohno et al. 2014 Sci. Rep.) rpsL: Mutations detected in the normal small intestines of KBrO3-treated Mutyh−/− by rpsL assay (i…
