# Supplementary material for: Oxidative stress accelerates intestinal tumorigenesis by enhancing 8-oxoguanine-mediated mutagenesis in MUTYH-deficient mice
Source: HighWire-hosted journal article supplement (doi:10.1101/gr.278326.123), 2024-01-01
Supplement: Supplemental_Table_S5.xlsx [file Supplemental_Table_S5.xlsx]

## Sheet: Table S5  Correlation 
Supplemental Tabel S5. Peason's Correlation Coefficient
	Y4tumor	rpsL	TOY	MAP	Signature_1	Signature_2	Signature_3	Signature_4	Signature_5	Signature_6	Signature_7	Signature_8	Signature_9	Signature_10	Signature_11	Signature_12	Signature_13	Signature_14	Signature_15	Signature_16	Signature_17	Signature_18	Signature_19	Signature_20	Signature_21	Signature_22	Signature_23	Signature_24	Signature_25	Signature_26	Signature_27	Signature_28	Signature_29	Signature_30	SBS1	SBS2	SBS3	SBS4	SBS5	SBS6	SBS7a	SBS7b	SBS7c	SBS7d	SBS8	SBS9	SBS10a	SBS10b	SBS10c
Y4tumor	1	0.5054	0.8085	0.8417	0.0217	-0.0115	0.2702	0.7185	0.1756	0.1304	-0.0493	0.6382	0.1694	0.4832	-0.0485	-0.0088	-0.0062	0.48	0.0767	0.1244	-0.0765	0.8065	0.0189	0.333	-0.084	-0.0818	-0.0497	0.5459	0.1274	-0.0464	-0.0365	-0.1018	0.6265	-0.11	-0.0587	-0.0249	0.2491	0.8025	0.0153	-0.0449	-0.0456	-0.0426	-0.0405	-0.0153	0.5359	0.0118	0.583	0.0747	0.6584
rpsL	0.5054	1	0.3489	0.3431	0.0548	0.0128	0.0171	0.39	0.0235	0.1309	0.233	0.1748	-0.1054	0.0061	0.1178	-0.0752	-0.0197	0.2556	-0.0076	-0.032	-0.0712	0.34	0.0084	0.237	-0.0825	-0.0952	-0.0259	0.3426	-0.0903	-0.0798	-0.0497	-0.1146	0.3161	0.0678	0.0177	0.0068	0.0251	0.4801	-0.0343	0.019	0.2211	0.1701	-0.0476	-0.0518	0.1807	-0.161	0.0022	-0.0018	0.0911
TOY	0.8085	0.3489	1	0.8688	0.013	-0.0287	0.1877	0.6824	0.1207	0.0305	-0.0516	0.5849	0.1375	0.4408	-0.0791	-0.0866	-0.0058	0.4386	0.056	0.0403	-0.0779	0.9456	-0.0407	0.1456	-0.1177	-0.094	-0.0913	0.6804	0.0933	-0.1149	-0.0263	-0.1123	0.7591	-0.1033	-0.0471	-0.0418	0.102	0.6542	-0.0445	-0.0833	-0.0432	-0.0591	-0.0722	-0.0645	0.5008	0.0076	0.5377	0.0567	0.5773
MAP	0.8417	0.3431	0.8688	1	0.1251	0.0035	0.1922	0.6115	0.2011	0.0668	-0.0432	0.5933	0.236	0.6366	-0.062	-0.0595	0.0364	0.3473	0.0692	0.0941	-0.0674	0.8763	0.0111	0.1049	-0.1072	-0.0869	-0.0578	0.5252	0.1303	-0.0953	-0.0222	-0.0897	0.5883	-0.0867	0.0451	-0.0251	0.0863	0.5968	0.0212	0.0006	-0.0386	-0.0455	-0.0471	-0.0388	0.4487	0.0873	0.7542	0.1157	0.7788
Signature_1	0.0217	0.0548	0.013	0.1251	1	0.0747	-0.1506	-0.0246	0.2757	0.773	0.1765	0.1043	-0.0009	0.2249	0.1757	-0.0063	-0.0385	0.4191	0.4293	-0.0142	-0.0127	0.0607	0.3454	0.3033	0.1287	-0.1001	0.1873	-0.0058	0.1037	0.136	-0.0283	-0.0822	0.1903	0.2767	0.9539	0.062	-0.1555	-0.0524	0.218	0.7986	0.1263	0.1633	-0.0682	0.0062	-0.1007	-0.0908	0.0484	0.3056	0.0736
Signature_2	-0.0115	0.0128	-0.0287	0.0035	0.0747	1	0.0598	-0.0545	0.0637	-0.015	0.5189	-0.0244	-0.0562	0.0936	0.3149	-0.0019	0.3603	0.0547	0.0032	0.1372	0.0305	0.0204	0.1505	0.0025	-0.0389	-0.0652	0.0694	0.0773	0.0356	-0.0112	0.0132	-0.0361	0.0115	0.5279	-0.0111	0.9849	-0.0312	-0.0483	0.2382	0.0243	0.6937	0.2723	0.0049	0.0343	-0.0872	-0.0779	0.0204	0.236	-0.0045
Signature_3	0.2702	0.0171	0.1877	0.1922	-0.1506	0.0598	1	0.3816	0.3612	-0.1315	0.0283	0.4697	-0.0082	0.0231	0.0566	0.0337	0.4029	0.0669	-0.1099	0.3069	-0.0066	0.2247	0.1394	0.0594	-0.1521	-0.0267	0.0422	0.2307	0.1863	-0.0601	-0.0603	-0.054	0.2256	0.0254	-0.2205	-0.0155	0.8689	0.3346	0.3141	-0.1335	0.0275	0.0522	0.0633	-0.0279	0.3604	-0.0802	0.123	-0.1002	0.1063
Signature_4	0.7185	0.39	0.6824	0.6115	-0.0246	-0.0545	0.3816	1	0.1601	0.0383	-0.0211	0.6861	-0.0736	0.1752	-0.0006	-0.0655	-0.036	0.2878	-0.0147	0.112	-0.1402	0.6769	0.1136	0.2179	-0.1745	0.1405	0.0392	0.7572	0.2372	-0.1623	-0.0153	-0.2058	0.7405	-0.0481	-0.1079	-0.0627	0.4592	0.9459	0.0133	-0.0858	-0.043	0.0356	-0.097	-0.0947	0.713	-0.2161	0.2713	-0.0405	0.3038
Signature_5	0.1756	0.0235	0.1207	0.2011	0.2757	0.0637	0.3612	0.1601	1	0.3031	0.2731	0.3211	0.3373	0.1526	0.3633	0.6488	-0.0864	0.3056	0.2605	0.7946	0.1084	0.1545	0.5091	0.4564	0.3479	-0.0333	0.371	0.0463	0.3275	0.5664	-0.0408	0.0138	0.178	0.3944	0.0706	0.0554	0.4498	0.0717	0.8952	0.274	0.2188	0.3274	0.0312	0.2155	0.0812	0.1994	0.1705	0.0464	0.2888
Signature_6	0.1304	0.1309	0.0305	0.0668	0.773	-0.015	-0.1315	0.0383	0.3031	1	0.0498	0.032	-0.0261	0.1066	0.2042	0.0497	-0.0853	0.713	0.7625	-0.0251	-0.0084	0.0215	0.4349	0.6613	0.1601	-0.1282	0.3252	0.0425	0.0488	0.2112	-0.0399	-0.0503	0.1533	0.2755	0.6895	-0.0168	-0.0818	0.0427	0.2674	0.9338	0.0162	0.0429	-0.1037	-0.0341	-0.1132	-0.0946	-0.0026	0.1528	0.0609
Signature_7	-0.0493	0.233	-0.0516	-0.0432	0.1765	0.5189	0.0283	-0.0211	0.2731	0.0498	1	-0.0873	-0.0521	0.143	0.7628	0.0202	0.066	0.1403	0.0616	0.1102	0.0394	-0.0144	0.4524	0.0584	-0.01	-0.0667	0.4333	-0.0049	-0.0089	-0.0031	-0.0036	-0.053	-0.0569	0.7513	0.0215	0.5092	0.0902	-0.0441	0.341	0.0989	0.9538	0.879	0.0174	0.0334	-0.1357	-0.0628	-0.0212	0.3515	-0.0204
Signature_8	0.6382	0.1748	0.5849	0.5933	0.1043	-0.0244	0.4697	0.6861	0.3211	0.032	-0.0873	1	0.1495	0.2839	-0.0709	0.0098	-0.0572	0.2897	-0.0247	0.2616	-0.0634	0.6198	0.0853	0.127	-0.1234	0.1722	-0.078	0.4336	0.3934	-0.0704	0.0537	-0.1315	0.6552	-0.1066	0.0384	-0.028	0.4281	0.7071	0.1486	-0.0455	-0.0783	-0.0663	0.1891	0.0111	0.9111	-0.034	0.3815	0.0112	0.477
Signature_9	0.1694	-0.1054	0.1375	0.236	-0.0009	-0.0562	-0.0082	-0.0736	0.3373	-0.0261	-0.0521	0.1495	1	0.2865	-0.0705	0.2433	-0.0906	0.0175	-0.0211	0.4102	0.5567	0.1389	-0.0203	0.0334	0.0658	-0.0809	-0.0676	-0.0996	0.0697	0.1766	-0.0444	0.5938	0.0396	-0.0618	-0.0361	-0.0504	-0.0138	-0.0389	0.2318	-0.0758	-0.0543	-0.0387	0.1501	0.1058	-0.0203	0.9613	0.2862	0.0796	0.4479
Signature_10	0.4832	0.0061	0.4408	0.6366	0.2249	0.0936	0.0231	0.1752	0.1526	0.1066	0.143	0.2839	0.2865	1	0.0285	-0.0547	0.0093	0.2689	0.0879	0.0594	0.05	0.488	0.0294	0.0718	-0.0127	-0.0725	-0.0146	0.1197	0.1474	-0.0154	-0.0233	0.0774	0.2192	0.0009	0.1221	0.0663	-0.0915	0.1681	0.103	0.0867	0.1027	0.092	-0.0371	-0.0012	0.116	0.1954	0.8587	0.6577	0.7998
Signature_11	-0.0485	0.1178	-0.0791	-0.062	0.1757	0.3149	0.0566	-0.0006	0.3633	0.2042	0.7628	-0.0709	-0.0705	0.0285	1	0.0053	-0.0023	0.3176	0.2705	0.0965	-0.0082	-0.0583	0.7004	0.2158	0.0099	-0.0876	0.8028	-0.0376	-0.0159	0.0063	-0.0069	-0.0845	-0.0687	0.7972	-0.0086	0.3109	0.2037	-0.05	0.4354	0.2789	0.6613	0.8641	-0.0252	0.0363	-0.1473	-0.0743	-0.024	0.1592	-0.0304
Signature_12	-0.0088	-0.0752	-0.0866	-0.0595	-0.0063	-0.0019	0.0337	-0.0655	0.6488	0.0497	0.0202	0.0098	0.2433	-0.0547	0.0053	1	-0.0987	-0.0267	0.0863	0.6907	0.0835	-0.08	0.1203	0.3298	0.725	-0.1061	0.0305	-0.1221	0.1606	0.8834	-0.0776	0.052	-0.0231	0.023	-0.1085	0.012	0.2085	-0.0851	0.582	-0.0609	0.0143	0.0365	0.0766	0.3496	-0.0961	0.1752	-0.0402	-0.0612	0.0987
Signature_13	-0.0062	-0.0197	-0.0058	0.0364	-0.0385	0.3603	0.4029	-0.036	-0.0864	-0.0853	0.066	-0.0572	-0.0906	0.0093	-0.0023	-0.0987	1	-0.0605	-0.0566	0.057	-0.0437	0.0084	-0.0089	-0.0924	-0.086	-0.0754	-0.0393	0.0365	0.048	-0.0482	-0.0282	-0.0693	-0.0585	0.0287	-0.0386	0.2061	0.2347	-0.0377	0.053	-0.055	0.121	-0.0084	-0.0111	-0.0394	-0.1066	-0.0852	0.0273	-0.0022	-0.0185
Signature_14	0.48	0.2556	0.4386	0.3473	0.4191	0.0547	0.0669	0.2878	0.3056	0.713	0.1403	0.2897	0.0175	0.2689	0.3176	-0.0267	-0.0605	1	0.6474	0.004	-0.0399	0.3077	0.42	0.6443	0.059	-0.1328	0.3384	0.2531	0.0668	0.099	-0.0368	-0.0995	0.3481	0.3041	0.3028	0.0519	0.0653	0.2964	0.2143	0.5808	0.1218	0.1479	-0.0762	-0.004	0.1488	-0.0691	0.2636	0.1124	0.3321
Signature_15	0.0767	-0.0076	0.056	0.0692	0.4293	0.0032	-0.1099	-0.0147	0.2605	0.7625	0.0616	-0.0247	-0.0211	0.0879	0.2705	0.0863	-0.0566	0.6474	1	0.0033	-0.0304	0.0407	0.4436	0.3771	0.236	-0.1067	0.4184	0.1052	-0.0087	0.2456	-0.0218	-0.0702	0.095	0.2522	0.3277	0.0055	-0.0576	-0.0344	0.2118	0.7558	0.0492	0.0492	-0.1022	0.0101	-0.103	-0.0618	0.054	0.0596	0.0703
Signature_16	0.1244	-0.032	0.0403	0.0941	-0.0142	0.1372	0.3069	0.112	0.7946	-0.0251	0.1102	0.2616	0.4102	0.0594	0.0965	0.6907	0.057	0.004	0.0033	1	0.1952	0.0731	0.2199	0.2377	0.2744	0.0044	0.0835	0.0176	0.2745	0.5633	-0.0506	0.126	0.0987	0.1101	-0.1485	0.1214	0.3999	0.079	0.7905	-0.0878	0.1123	0.1281	0.033	0.1813	0.0969	0.301	0.0816	0.0096	0.2074
Signature_17	-0.0765	-0.0712	-0.0779	-0.0674	-0.0127	0.0305	-0.0066	-0.1402	0.1084	-0.0084	0.0394	-0.0634	0.5567	0.05	-0.0082	0.0835	-0.0437	-0.0399	-0.0304	0.1952	1	-0.073	-0.0395	-0.012	-0.0157	-0.0554	-0.0392	-0.1232	-0.0006	0.0369	-0.0565	0.6046	-0.0996	0.0332	-0.0119	0.0389	-0.0294	-0.1326	0.0281	-0.0378	0.038	0.0239	0.0385	0.0144	-0.1234	0.5428	-0.0184	0.0506	0.1077
Signature_18	0.8065	0.34	0.9456	0.8763	0.0607	0.0204	0.2247	0.6769	0.1545	0.0215	-0.0144	0.6198	0.1389	0.488	-0.0583	-0.08	0.0084	0.3077	0.0407	0.0731	-0.073	1	-0.006	0.0771	-0.1271	-0.0861	-0.0686	0.6497	0.1206	-0.1311	-0.0323	-0.1184	0.7747	-0.064	-0.0115	0.0051	0.1382	0.6609	0.004	-0.0487	-0.0053	-0.0309	-0.0798	-0.0526	0.511	-0.0113	0.5763	0.0934	0.5844
Signature_19	0.0189	0.0084	-0.0407	0.0111	0.3454	0.1505	0.1394	0.1136	0.5091	0.4349	0.4524	0.0853	-0.0203	0.0294	0.7004	0.1203	-0.0089	0.42	0.4436	0.2199	-0.0395	-0.006	1	0.384	0.0586	-0.0898	0.8986	0.0258	0.0655	0.0836	-0.0065	-0.1164	0.0245	0.5901	0.1498	0.1307	0.3142	0.0441	0.492	0.4908	0.3343	0.6179	-0.0163	0.0739	-0.0328	-0.0498	0.0061	0.0698	0.0198
Signature_20	0.333	0.237	0.1456	0.1049	0.3033	0.0025	0.0594	0.2179	0.4564	0.6613	0.0584	0.127	0.0334	0.0718	0.2158	0.3298	-0.0924	0.6443	0.3771	0.2377	-0.012	0.0771	0.384	1	0.1646	-0.1357	0.3069	0.0579	0.1042	0.349	-0.0578	-0.0326	0.1655	0.2411	0.17	0.0045	0.1702	0.2509	0.439	0.4476	0.0311	0.0735	-0.0735	-0.0269	0.0133	-0.0443	0.0293	0.0811	0.17
Signature_21	-0.084	-0.0825	-0.1177	-0.1072	0.1287	-0.0389	-0.1521	-0.1745	0.3479	0.1601	-0.01	-0.1234	0.0658	-0.0127	0.0099	0.725	-0.086	0.059	0.236	0.2744	-0.0157	-0.1271	0.0586	0.1646	1	-0.0931	0.0336	-0.1575	0.0982	0.8666	-0.0577	-0.0374	-0.0594	0.0094	0.0611	-0.0255	-0.015	-0.1857	0.2779	0.0917	-0.022	-0.0155	-0.0372	0.4396	-0.1769	0.026	-0.0473	0.0208	0.0325
Signature_22	-0.0818	-0.0952	-0.094	-0.0869	-0.1001	-0.0652	-0.0267	0.1405	-0.0333	-0.1282	-0.0667	0.1722	-0.0809	-0.0725	-0.0876	-0.1061	-0.0754	-0.1328	-0.1067	0.0044	-0.0554	-0.0861	-0.0898	-0.1357	-0.0931	1	-0.0751	-0.1037	0.7343	-0.1198	0.3649	-0.0527	-0.1354	-0.0572	-0.0542	-0.052	0.0377	0.14	-0.1449	-0.0996	-0.0642	-0.0616	0.061	-0.0595	0.3276	-0.0844	-0.0353	-0.0687	-0.0808
Signature_23	-0.0497	-0.0259	-0.0913	-0.0578	0.1873	0.0694	0.0422	0.0392	0.371	0.3252	0.4333	-0.078	-0.0676	-0.0146	0.8028	0.0305	-0.0393	0.3384	0.4184	0.0835	-0.0392	-0.0686	0.8986	0.3069	0.0336	-0.0751	1	-0.0313	-0.0118	0.0081	-0.0011	-0.09	-0.0708	0.6233	-0.0033	0.0573	0.2593	-0.0357	0.3805	0.4026	0.2859	0.6598	-0.0346	0.0076	-0.126	-0.0528	-0.0262	0.0276	-0.0343
Signature_24	0.5459	0.3426	0.6804	0.5252	-0.0058	0.0773	0.2307	0.7572	0.0463	0.0425	-0.0049	0.4336	-0.0996	0.1197	-0.0376	-0.1221	0.0365	0.2531	0.1052	0.0176	-0.1232	0.6497	0.0258	0.0579	-0.1575	-0.1037	-0.0313	1	-0.0401	-0.1837	-0.0429	-0.183	0.7903	-0.0125	-0.0681	0.0696	0.2112	0.6819	-0.0358	-0.004	0.0354	-0.0646	-0.1304	-0.0738	0.4667	-0.1955	0.1725	-0.0134	0.1665
Signature_25	0.1274	-0.0903	0.0933	0.1303	0.1037	0.0356	0.1863	0.2372	0.3275	0.0488	-0.0089	0.3934	0.0697	0.1474	-0.0159	0.1606	0.048	0.0668	-0.0087	0.2745	-0.0006	0.1206	0.0655	0.1042	0.0982	0.7343	-0.0118	-0.0401	1	0.1472	0.3058	-0.0633	0.0559	0.0661	0.0642	0.0173	0.2302	0.2164	0.2035	0.041	-0.0108	-0.0063	0.0857	0.06	0.3792	-0.0135	0.1675	0.0574	0.1833
Signature_26	-0.0464	-0.0798	-0.1149	-0.0953	0.136	-0.0112	-0.0601	-0.1623	0.5664	0.2112	-0.0031	-0.0704	0.1766	-0.0154	0.0063	0.8834	-0.0482	0.099	0.2456	0.5633	0.0369	-0.1311	0.0836	0.349	0.8666	-0.1198	0.0081	-0.1837	0.1472	1	-0.0594	0.0192	-0.0524	-0.0048	0.0561	-0.0042	0.063	-0.1691	0.523	0.0823	-0.0023	-0.0193	-0.0458	0.3379	-0.1914	0.1099	-0.0439	0.0112	0.078
Signature_27	-0.0365	-0.0497	-0.0263	-0.0222	-0.0283	0.0132	-0.0603	-0.0153	-0.0408	-0.0399	-0.0036	0.0537	-0.0444	-0.0233	-0.0069	-0.0776	-0.0282	-0.0368	-0.0218	-0.0506	-0.0565	-0.0323	-0.0065	-0.0578	-0.0577	0.3649	-0.0011	-0.0429	0.3058	-0.0594	1	-0.0696	-0.049	0.0317	-0.0212	0.0193	-0.062	0.0397	-0.0606	-0.0105	0.0062	-0.0051	-0.0344	-0.0349	0.1053	-0.0476	-0.0036	-0.0218	-0.0402
Signature_28	-0.1018	-0.1146	-0.1123	-0.0897	-0.0822	-0.0361	-0.054	-0.2058	0.0138	-0.0503	-0.053	-0.1315	0.5938	0.0774	-0.0845	0.052	-0.0693	-0.0995	-0.0702	0.126	0.6046	-0.1184	-0.1164	-0.0326	-0.0374	-0.0527	-0.09	-0.183	-0.0633	0.0192	-0.0696	1	-0.1452	-0.0654	-0.0551	-0.0217	-0.094	-0.1781	-0.0145	-0.091	-0.0439	-0.0641	0.0673	-0.0498	-0.1697	0.6056	-0.0217	0.089	0.0797
Signature_29	0.6265	0.3161	0.7591	0.5883	0.1903	0.0115	0.2256	0.7405	0.178	0.1533	-0.0569	0.6552	0.0396	0.2192	-0.0687	-0.0231	-0.0585	0.3481	0.095	0.0987	-0.0996	0.7747	0.0245	0.1655	-0.0594	-0.1354	-0.0708	0.7903	0.0559	-0.0524	-0.049	-0.1452	1	-0.0623	0.1214	0.0138	0.1832	0.6927	0.0532	0.0532	-0.0466	-0.0607	-0.1255	-0.0181	0.595	-0.1288	0.2419	0.0695	0.2945
Signature_30	-0.11	0.0678	-0.1033	-0.0867	0.2767	0.5279	0.0254	-0.0481	0.3944	0.2755	0.7513	-0.1066	-0.0618	0.0009	0.7972	0.023	0.0287	0.3041	0.2522	0.1101	0.0332	-0.064	0.5901	0.2411	0.0094	-0.0572	0.6233	-0.0125	0.0661	-0.0048	0.0317	-0.0654	-0.0623	1	0.0789	0.5222	0.0943	-0.1103	0.4844	0.3896	0.7345	0.7135	-0.0566	0.0292	-0.2012	-0.0733	-0.056	0.1259	-0.0707
SBS1	-0.0587	0.0177	-0.0471	0.0451	0.9539	-0.0111	-0.2205	-0.1079	0.0706	0.6895	0.0215	0.0384	-0.0361	0.1221	-0.0086	-0.1085	-0.0386	0.3028	0.3277	-0.1485	-0.0119	-0.0115	0.1498	0.17	0.0611	-0.0542	-0.0033	-0.0681	0.0642	0.0561	-0.0212	-0.0551	0.1214	0.0789	1	-0.0165	-0.2568	-0.1117	0.0106	0.7083	-0.0051	-0.0009	-0.0551	-0.0486	-0.1253	-0.0978	-0.0185	0.1915	-0.0125
SBS2	-0.0249	0.0068	-0.0418	-0.0251	0.062	0.9849	-0.0155	-0.0627	0.0554	-0.0168	0.5092	-0.028	-0.0504	0.0663	0.3109	0.012	0.2061	0.0519	0.0055	0.1214	0.0389	0.0051	0.1307	0.0045	-0.0255	-0.052	0.0573	0.0696	0.0173	-0.0042	0.0193	-0.0217	0.0138	0.5222	-0.0165	1	-0.0795	-0.0516	0.2173	0.0155	0.6909	0.2607	0.0083	0.0419	-0.0758	-0.0704	-0.0041	0.2213	-0.0223
SBS3	0.2491	0.0251	0.102	0.0863	-0.1555	-0.0312	0.8689	0.4592	0.4498	-0.0818	0.0902	0.4281	-0.0138	-0.0915	0.2037	0.2085	0.2347	0.0653	-0.0576	0.3999	-0.0294	0.1382	0.3142	0.1702	-0.015	0.0377	0.2593	0.2112	0.2302	0.063	-0.062	-0.094	0.1832	0.0943	-0.2568	-0.0795	1	0.4178	0.3855	-0.118	0.0345	0.2035	0.0645	0.0353	0.3777	-0.0845	0.0019	-0.1477	0.0196
SBS4	0.8025	0.4801	0.6542	0.5968	-0.0524	-0.0483	0.3346	0.9459	0.0717	0.0427	-0.0441	0.7071	-0.0389	0.1681	-0.05	-0.0851	-0.0377	0.2964	-0.0344	0.079	-0.1326	0.6609	0.0441	0.2509	-0.1857	0.14	-0.0357	0.6819	0.2164	-0.1691	0.0397	-0.1781	0.6927	-0.1103	-0.1117	-0.0516	0.4178	1	-0.0621	-0.1211	-0.0498	-0.014	-0.0716	-0.0913	0.742	-0.1822	0.2548	-0.0332	0.3193
SBS5	0.0153	-0.0343	-0.0445	0.0212	0.218	0.2382	0.3141	0.0133	0.8952	0.2674	0.341	0.1486	0.2318	0.103	0.4354	0.582	0.053	0.2143	0.2118	0.7905	0.0281	0.004	0.492	0.439	0.2779	-0.1449	0.3805	-0.0358	0.2035	0.523	-0.0606	-0.0145	0.0532	0.4844	0.0106	0.2173	0.3855	-0.0621	1	0.2723	0.3116	0.3578	-0.0176	0.1716	-0.0907	0.1395	0.0503	0.1542	0.1209
SBS6	-0.0449	0.019	-0.0833	0.0006	0.7986	0.0243	-0.1335	-0.0858	0.274	0.9338	0.0989	-0.0455	-0.0758	0.0867	0.2789	-0.0609	-0.055	0.5808	0.7558	-0.0878	-0.0378	-0.0487	0.4908	0.4476	0.0917	-0.0996	0.4026	-0.004	0.041	0.0823	-0.0105	-0.091	0.0532	0.3896	0.7083	0.0155	-0.118	-0.1211	0.2723	1	0.0614	0.0946	-0.0933	-0.0313	-0.194	-0.114	-0.0236	0.1602	-0.0289
SBS7a	-0.0456	0.2211	-0.0432	-0.0386	0.1263	0.6937	0.0275	-0.043	0.2188	0.0162	0.9538	-0.0783	-0.0543	0.1027	0.6613	0.0143	0.121	0.1218	0.0492	0.1123	0.038	-0.0053	0.3343	0.0311	-0.022	-0.0642	0.2859	0.0354	-0.0108	-0.0023	0.0062	-0.0439	-0.0466	0.7345	-0.0051	0.6909	0.0345	-0.0498	0.3116	0.0614	1	0.7236	0.0165	0.0134	-0.1236	-0.0666	-0.0183	0.2776	-0.0233
SBS7b	-0.0426	0.1701	-0.0591	-0.0455	0.1633	0.2723	0.0522	0.0356	0.3274	0.0429	0.879	-0.0663	-0.0387	0.092	0.8641	0.0365	-0.0084	0.1479	0.0492	0.1281	0.0239	-0.0309	0.6179	0.0735	-0.0155	-0.0616	0.6598	-0.0646	-0.0063	-0.0193	-0.0051	-0.0641	-0.0607	0.7135	-0.0009	0.2607	0.2035	-0.014	0.3578	0.0946	0.7236	1	-0.0017	0.05	-0.122	-0.0471	-0.0215	0.2632	-0.013
SBS7c	-0.0405	-0.0476	-0.0722	-0.0471	-0.0682	0.0049	0.0633	-0.097	0.0312	-0.1037	0.0174	0.1891	0.1501	-0.0371	-0.0252	0.0766	-0.0111	-0.0762	-0.1022	0.033	0.0385	-0.0798	-0.0163	-0.0735	-0.0372	0.061	-0.0346	-0.1304	0.0857	-0.0458	-0.0344	0.0673	-0.1255	-0.0566	-0.0551	0.0083	0.0645	-0.0716	-0.0176	-0.0933	0.0165	-0.0017	1	0.0995	0.2117	0.1797	-0.0225	-0.0433	0.027
SBS7d	-0.0153	-0.0518	-0.0645	-0.0388	0.0062	0.0343	-0.0279	-0.0947	0.2155	-0.0341	0.0334	0.0111	0.1058	-0.0012	0.0363	0.3496	-0.0394	-0.004	0.0101	0.1813	0.0144	-0.0526	0.0739	-0.0269	0.4396	-0.0595	0.0076	-0.0738	0.06	0.3379	-0.0349	-0.0498	-0.0181	0.0292	-0.0486	0.0419	0.0353	-0.0913	0.1716	-0.0313	0.0134	0.05	0.0995	1	-0.0422	0.0706	-0.0184	0.0365	0.0403
SBS8	0.5359	0.1807	0.5008	0.4487	-0.1007	-0.0872	0.3604	0.713	0.0812	-0.1132	-0.1357	0.9111	-0.0203	0.116	-0.1473	-0.0961	-0.1066	0.1488	-0.103	0.0969	-0.1234	0.511	-0.0328	0.0133	-0.1769	0.3276	-0.126	0.4667	0.3792	-0.1914	0.1053	-0.1697	0.595	-0.2012	-0.1253	-0.0758	0.3777	0.742	-0.0907	-0.194	-0.1236	-0.122	0.2117	-0.0422	1	-0.1632	0.223	-0.0763	0.2921
SBS9	0.0118	-0.161	0.0076	0.0873	-0.0908	-0.0779	-0.0802	-0.2161	0.1994	-0.0946	-0.0628	-0.034	0.9613	0.1954	-0.0743	0.1752	-0.0852	-0.0691	-0.0618	0.301	0.5428	-0.0113	-0.0498	-0.0443	0.026	-0.0844	-0.0528	-0.1955	-0.0135	0.1099	-0.0476	0.6056	-0.1288	-0.0733	-0.0978	-0.0704	-0.0845	-0.1822	0.1395	-0.114	-0.0666	-0.0471	0.1797	0.0706	-0.1632	1	0.1871	0.0464	0.3191
SBS10a	0.583	0.0022	0.5377	0.7542	0.0484	0.0204	0.123	0.2713	0.1705	-0.0026	-0.0212	0.3815	0.2862	0.8587	-0.024	-0.0402	0.0273	0.2636	0.054	0.0816	-0.0184	0.5763	0.0061	0.0293	-0.0473	-0.0353	-0.0262	0.1725	0.1675	-0.0439	-0.0036	-0.0217	0.2419	-0.056	-0.0185	-0.0041	0.0019	0.2548	0.0503	-0.0236	-0.0183	-0.0215	-0.0225	-0.0184	0.223	0.1871	1	0.1972	0.917
SBS10b	0.0747	-0.0018	0.0567	0.1157	0.3056	0.236	-0.1002	-0.0405	0.0464	0.1528	0.3515	0.0112	0.0796	0.6577	0.1592	-0.0612	-0.0022	0.1124	0.0596	0.0096	0.0506	0.0934	0.0698	0.0811	0.0208	-0.0687	0.0276	-0.0134	0.0574	0.0112	-0.0218	0.089	0.0695	0.1259	0.1915	0.2213	-0.1477	-0.0332	0.1542	0.1602	0.2776	0.2632	-0.0433	0.0365	-0.0763	0.0464	0.1972	1	0.1906
SBS10c	0.6584	0.0911	0.5773	0.7788	0.0736	-0.0045	0.1063	0.3038	0.2888	0.0609	-0.0204	0.477	0.4479	0.7998	-0.0304	0.0987	-0.0185	0.3321	0.0703	0.2074	0.1077	0.5844	0.0198	0.17	0.0325	-0.0808	-0.0343	0.1665	0.1833	0.078	-0.0402	0.0797	0.2945	-0.0707	-0.0125	-0.0223	0.0196	0.3193	0.1209	-0.0289	-0.0233	-0.013	0.027	0.0403	0.2921	0.3191	0.917	0.1906	1
SBS10d	0.6341	0.1261	0.5995	0.8722	0.0306	0.008	0.1179	0.3495	0.1748	-0.0356	-0.038	0.4387	0.3243	0.7496	-0.051	-0.04	0.0469	0.1953	0.0147	0.0901	-0.0269	0.6131	-0.023	0.0071	-0.0695	-0.0457	-0.05	0.2438	0.1236	-0.0638	-0.0114	-0.0332	0.2913	-0.0887	-0.0425	-0.0223	0.0019	0.341	0.0246	-0.0619	-0.0345	-0.0368	-0.02	-0.0204	0.3	0.2091	0.8883	0.1521	0.8856
SBS11	-0.0448	0.0939	-0.0781	-0.0639	0.1416	0.2741	0.0592	-0.0212	0.3341	0.1987	0.6542	-0.0473	-0.065	0.0239	0.9675	-0.0119	-0.0153	0.3317	0.2829	0.0818	-0.0158	-0.0662	0.6268	0.2218	0.0076	-0.0886	0.7324	-0.0419	-0.0183	0.0127	-0.0091	-0.0816	-0.0704	0.717	-0.0266	0.2749	0.1752	-0.0615	0.422	0.2722	0.5744	0.7448	-0.0299	0.0501	-0.1345	-0.0713	-0.0192	0.1588	-0.0268
SBS12	-0.0712	-0.1233	-0.1306	-0.1021	-0.0402	-0.0567	-0.0085	-0.1722	0.5696	-0.0295	-0.083	-0.0497	0.2667	-0.0578	-0.1191	0.9438	-0.0833	-0.1181	0.0116	0.7012	0.0469	-0.1342	-0.0483	0.2009	0.6549	-0.0949	-0.1203	-0.1913	0.1384	0.8462	-0.073	0.041	-0.0779	-0.1286	-0.0937	-0.0425	0.1277	-0.1764	0.5379	-0.1247	-0.0739	-0.0846	0.0728	0.3372	-0.1544	0.2187	-0.0462	-0.058	0.0778
SBS13	0.0333	0.006	0.0362	0.0929	-0.0475	0.144	0.4194	0.0012	-0.0863	-0.0864	-0.039	-0.0273	-0.068	0.0315	-0.0531	-0.108	0.9701	-0.063	-0.0639	0.0399	-0.0548	0.038	-0.0342	-0.0955	-0.0891	-0.0693	-0.0518	0.0346	0.0511	-0.0562	-0.0352	-0.0714	-0.0464	-0.0878	-0.0372	-0.0182	0.2551	-0.0064	0.0157	-0.0601	-0.0312	-0.0458	-0.0182	-0.0446	-0.0776	-0.0661	0.0662	-0.0255	0.0253
SBS14	0.7117	0.3033	0.6532	0.5358	0.0647	-0.0351	0.1631	0.4578	0.1478	0.2516	-0.0606	0.4755	0.1054	0.4164	-0.0477	-0.0106	-0.0359	0.76	0.1378	0.0502	-0.0599	0.4941	0.0254	0.5037	-0.0081	-0.0759	-0.0397	0.3109	0.1048	0.047	-0.0339	-0.0782	0.4521	-0.0642	0.0133	-0.0396	0.1091	0.5089	0.0214	0.0251	-0.0555	-0.0637	-0.0344	-0.0252	0.3841	0.0035	0.4811	0.0748	0.5614
SBS15	0.1198	0.05	0.0577	0.1068	0.5742	0.0412	-0.1278	0.0079	0.1924	0.8256	0.0614	0.0063	-0.041	0.0777	0.2018	-0.028	-0.0319	0.6178	0.9197	-0.0639	-0.047	0.0755	0.4187	0.3236	0.093	-0.0914	0.3507	0.1223	-0.002	0.117	-0.0107	-0.0736	0.122	0.2348	0.5042	0.0397	-0.0881	0.0169	0.1302	0.828	0.0553	0.04	-0.0829	-0.0124	-0.083	-0.0868	0.0238	0.0679	0.0434
SBS16	0.0015	-0.0636	-0.0279	-0.0034	-0.0018	0.0208	0.1495	-0.015	0.5245	-0.0414	-0.0237	0.149	0.2509	-0.0106	-0.0281	0.3534	0.0416	-0.0664	-0.0264	0.8148	-0.0312	-0.0146	0.072	0.0771	0.0689	-0.006	-0.0264	-0.0425	0.1401	0.3513	-0.012	-0.0213	0.0202	-0.0696	-0.0553	0.011	0.1897	-0.0164	0.614	-0.0722	-0.0179	-0.0104	-0.0261	0.0373	0.0352	0.1811	0.0018	0.0009	0.0672
SBS17a	-0.0558	-0.0701	-0.0677	-0.0559	-0.0381	-0.0416	0.0693	-0.0643	0.1836	-0.0422	-0.0412	0.041	0.2041	-0.0405	-0.0634	0.3093	-0.0426	-0.0671	-0.0391	0.2409	0.3629	-0.0725	-0.0521	0.0799	0.0677	0.0128	-0.0609	-0.0963	0.061	0.1489	-0.0315	0.0777	-0.0809	-0.0971	-0.04	-0.0343	0.1376	-0.0758	0.0756	-0.0615	-0.0436	-0.0404	0.148	0.0729	0.0006	0.2277	-0.0288	-0.0431	0.0373
SBS17b	-0.052	-0.057	-0.0532	-0.0527	-0.0576	-0.0347	-0.0374	-0.1172	-0.0054	-0.023	-0.0407	-0.087	0.5313	0.0379	-0.0541	-0.0489	-0.0348	-0.0396	-0.0304	0.0912	0.927	-0.0567	-0.0745	-0.0689	-0.0545	-0.0516	-0.0528	-0.0846	-0.048	-0.0365	-0.0389	0.6323	-0.0791	-0.0262	-0.0357	-0.0274	-0.0797	-0.0955	-0.0604	-0.0543	-0.0383	-0.0468	-0.0173	-0.034	-0.1154	0.5179	-0.0129	0.0093	0.1
SBS18	0.8256	0.3354	0.9402	0.918	0.0976	0.0082	0.238	0.6848	0.1943	0.0594	-0.0083	0.6524	0.176	0.5423	-0.0354	-0.0831	0.0065	0.3468	0.072	0.0806	-0.0668	0.9896	0.0305	0.0979	-0.1304	-0.0972	-0.0366	0.6386	0.1269	-0.1359	-0.0304	-0.1099	0.7689	-0.0399	0.0096	-0.0113	0.1442	0.6609	0.028	-0.0029	-0.0056	-0.0185	-0.0588	-0.0536	0.5263	0.0184	0.637	0.1078	0.6518
SBS19	-0.0547	-0.043	-0.0877	-0.0465	0.1414	0.2042	0.1262	0.0722	0.3767	0.1817	0.4269	0.0076	-0.0311	-0.0066	0.5864	0.084	-0.005	0.2253	0.1995	0.1791	-0.0027	-0.056	0.8995	0.207	-0.0195	-0.0736	0.7944	-0.027	0.0324	-0.0181	-0.0032	-0.0664	-0.0665	0.5462	-0.0286	0.1886	0.2736	-0.0109	0.387	0.2543	0.3178	0.615	-0.0098	0.0499	-0.0788	-0.027	-0.0233	0.0564	-0.0285
SBS20	0.5151	0.3839	0.2632	0.1472	0.092	-0.0327	0.1347	0.399	0.1698	0.4644	-0.0036	0.2657	-0.0036	-0.0167	0.0772	0.0796	-0.0588	0.6596	0.2409	0.0606	-0.044	0.1478	0.1832	0.7568	0.0127	-0.0728	0.128	0.1491	0.0538	0.1127	-0.0362	-0.0614	0.2254	0.0931	0.0214	-0.0284	0.2319	0.5096	0.126	0.2114	-0.0107	0.005	0.0109	-0.0232	0.2172	-0.0721	-0.0161	-0.025	0.1571
SBS21	-0.0345	-0.0629	-0.0554	-0.0729	0.0089	-0.0575	-0.1119	-0.1175	0.2566	0.0403	-0.0611	-0.0988	0.0666	-0.0257	-0.061	0.6846	-0.0636	0.0301	0.1379	0.223	-0.0314	-0.0813	-0.0322	0.0647	0.9528	-0.0884	-0.045	-0.1107	0.0841	0.8079	-0.0517	-0.0324	-0.021	-0.0669	-0.038	-0.0457	0.0142	-0.122	0.1755	-0.0367	-0.0627	-0.0617	-0.0067	0.439	-0.1367	0.0382	-0.0341	-0.0207	0.0405
SBS22	-0.1085	-0.1194	-0.1138	-0.1114	-0.1275	-0.0737	-0.0421	0.0865	-0.0613	-0.1595	-0.0875	0.1621	-0.0604	-0.0932	-0.1116	-0.1134	-0.0733	-0.1661	-0.129	-0.0003	-0.0682	-0.1081	-0.1143	-0.1615	-0.1122	0.9605	-0.1009	-0.1218	0.6862	-0.1294	0.5556	-0.0569	-0.1544	-0.0847	-0.0729	-0.059	0.0113	0.1088	-0.1555	-0.1248	-0.0783	-0.089	0.0815	-0.0676	0.3178	-0.0599	-0.0523	-0.08	-0.1118
SBS23	-0.0506	-0.0262	-0.0917	-0.0579	0.186	0.0755	0.0468	0.041	0.3751	0.3175	0.4396	-0.0745	-0.0668	-0.0147	0.8072	0.0314	-0.0385	0.3349	0.4049	0.0868	-0.038	-0.0683	0.9014	0.304	0.0295	-0.0757	0.9995	-0.0327	-0.0101	0.0056	-0.0017	-0.09	-0.0703	0.6312	-0.0054	0.0632	0.2634	-0.0347	0.386	0.3961	0.2913	0.6692	-0.0343	0.009	-0.1251	-0.0524	-0.0265	0.0293	-0.0345
SBS24	0.3942	0.2207	0.5982	0.4172	0.0346	-0.053	0.1363	0.6711	0.0893	0.1489	-0.0261	0.3662	-0.0574	0.0745	0.0563	-0.1073	-0.0395	0.3153	0.2346	-0.0009	-0.0935	0.5394	0.0968	0.1149	-0.105	-0.124	0.0967	0.9109	-0.0527	-0.14	-0.0402	-0.1388	0.7683	0.0357	-0.0453	-0.0557	0.1379	0.5468	0.0097	0.1166	-0.0289	-0.0207	-0.1146	-0.0743	0.3996	-0.1438	0.118	-0.0245	0.1251
SBS25	0.1272	-0.0904	0.0933	0.1301	0.1042	0.0357	0.186	0.237	0.3275	0.0492	-0.009	0.3934	0.0697	0.1472	-0.0162	0.1608	0.048	0.067	-0.0085	0.2745	-0.0005	0.1206	0.0652	0.1046	0.0985	0.7345	-0.0123	-0.0403	1	0.1476	0.3057	-0.0632	0.0561	0.0659	0.0647	0.0173	0.2298	0.2162	0.2035	0.0413	-0.0108	-0.0066	0.0854	0.0603	0.3791	-0.0135	0.1672	0.0574	0.1833
SBS26	-0.0806	-0.1204	-0.1336	-0.1111	-0.0066	-0.0754	-0.0631	-0.1765	0.5596	0.0526	-0.0863	-0.091	0.291	-0.0473	-0.1119	0.9161	-0.0882	-0.0749	0.0571	0.6427	0.1112	-0.1454	-0.0449	0.3157	0.7136	-0.1086	-0.106	-0.2142	0.1375	0.9014	-0.0745	0.0945	-0.0853	-0.1321	-0.0567	-0.0605	0.0775	-0.188	0.5276	-0.0813	-0.0823	-0.0902	0.0276	0.3005	-0.1964	0.2375	-0.0499	-0.0434	0.0847
SBS27	-0.0365	-0.0497	-0.0262	-0.0222	-0.0284	0.0133	-0.0603	-0.0153	-0.0409	-0.04	-0.0036	0.0537	-0.0444	-0.0233	-0.0069	-0.0777	-0.0282	-0.0369	-0.0219	-0.0506	-0.0565	-0.0322	-0.0066	-0.0579	-0.0577	0.3649	-0.0013	-0.0429	0.3058	-0.0594	1	-0.0696	-0.049	0.0316	-0.0212	0.0193	-0.062	0.0398	-0.0607	-0.0106	0.0062	-0.0051	-0.0344	-0.0348	0.1053	-0.0476	-0.0036	-0.0218	-0.0402
SBS28	-0.0549	-0.0568	-0.0567	-0.0315	-0.0526	-0.0305	-0.0415	-0.1377	-0.0335	-0.0406	-0.0384	-0.0999	0.5241	0.1084	-0.0546	-0.0984	-0.0399	-0.0646	-0.0621	0.0326	0.3536	-0.0661	-0.0837	-0.0942	-0.0817	-0.0718	-0.0559	-0.1089	-0.0973	-0.087	-0.0514	0.9083	-0.0769	-0.0577	-0.031	-0.0223	-0.0925	-0.1118	-0.0347	-0.0579	-0.033	-0.0443	0.0264	-0.0435	-0.1329	0.5427	-0.0012	0.1361	0.0667
SBS29	0.6369	0.3464	0.8292	0.6196	0.0985	-0.0411	0.2069	0.7793	0.0695	0.1084	-0.0852	0.6205	-0.0078	0.1824	-0.1057	-0.1208	-0.0497	0.3626	0.0848	-0.001	-0.1104	0.8002	-0.0215	0.1366	-0.1425	-0.1229	-0.0895	0.8485	0.0113	-0.1558	-0.0373	-0.159	0.9627	-0.1035	0.0463	-0.0408	0.1644	0.7249	-0.0609	0.0073	-0.0762	-0.0937	-0.115	-0.0905	0.6054	-0.1494	0.2173	0.0292	0.2665
SBS30	-0.0679	0.1125	-0.0911	-0.0573	0.2398	0.4452	0.1101	0.0072	0.4271	0.2258	0.7466	-0.0668	-0.0638	0.0112	0.818	0.0303	0.0394	0.2802	0.1908	0.1342	0.0162	-0.0491	0.5874	0.2326	-0.0166	-0.0906	0.6417	-0.014	0.0518	-0.0144	0.0093	-0.0601	-0.0569	0.9719	0.0371	0.4316	0.1894	-0.058	0.5142	0.3382	0.7016	0.7479	-0.0312	0.0086	-0.1715	-0.0759	-0.0349	0.1152	-0.0529
SBS31	0.0329	0.0134	-0.008	-0.0124	0.092	0.0362	0.1439	0.1967	0.3383	0.0355	0.4142	0.1421	-0.0148	-0.0247	0.5957	0.1079	-0.0546	0.135	0.0078	0.1978	-0.0085	0.0036	0.7118	0.1388	-0.0199	0.0731	0.7509	-0.0148	0.1308	-0.0004	0.0567	-0.061	0.0339	0.4267	-0.0369	0.0274	0.3746	0.1411	0.3073	0.0482	0.2434	0.7007	0.0488	-0.0201	0.1086	-0.0233	-0.0302	-0.0006	-0.0022
SBS32	-0.0024	0.005	-0.0397	0.0106	0.2568	0.2165	0.1325	0.0449	0.3594	0.2678	0.285	0.1606	-0.0674	0.0378	0.6506	-0.0013	-0.0303	0.3546	0.2135	0.0734	-0.0383	-0.0087	0.495	0.2555	0.025	-0.0996	0.49	-0.0026	0.0843	0.0312	-0.0147	-0.11	0.0524	0.5932	0.1119	0.2139	0.1504	-0.0097	0.4526	0.3617	0.2693	0.3444	-0.0631	0.0945	-0.0079	-0.1125	0.0133	0.1154	0.0003
SBS33	-0.001	-0.0479	-0.0394	-0.0125	-0.0005	0.0056	-0.0543	-0.0751	0.1861	0.0427	-0.032	-0.0957	0.036	0.0061	-0.0483	0.4131	0.0232	-0.0282	0.0095	0.2008	-0.0206	-0.0318	-0.0197	0.2259	0.3301	-0.0715	-0.0536	-0.0953	0.0196	0.3074	-0.044	0.0246	-0.0442	-0.0216	-0.0261	0.003	-0.0049	-0.0848	0.1896	-0.0351	-0.0227	-0.0385	-0.0194	0.0372	-0.1199	0.0009	0.0062	-0.0248	0.0685
SBS34	-0.0711	-0.0685	-0.0703	-0.0534	-0.0331	-0.0447	-0.0999	-0.0996	-0.0399	-0.07	-0.0512	0.1448	0.0934	-0.0559	-0.0707	-0.0788	-0.045	-0.0946	-0.0486	-0.0615	-0.0678	-0.065	-0.0766	-0.0928	-0.0549	0.1574	-0.0675	-0.1243	0.1348	-0.0942	0.1928	-0.0644	-0.0893	-0.0367	-0.0185	-0.0353	-0.1437	-0.0464	-0.1021	-0.0527	-0.0446	-0.0417	0.1894	0.0487	0.1317	0.1	-0.0257	-0.0431	0.1422
SBS35	0.3486	0.1975	0.2634	0.1578	-0.0529	-0.0297	0.31	0.5394	0.0628	0.0531	0.1384	0.4373	-0.1101	-0.0003	0.2519	-0.1359	0.0314	0.3221	0.0134	0.0214	-0.0655	0.19	0.2949	0.2261	-0.1592	0.3711	0.3376	0.2905	0.3358	-0.1592	0.2199	-0.1117	0.3027	0.0964	-0.1073	-0.0431	0.4269	0.547	-0.0305	-0.0574	0.0545	0.2898	0.0257	-0.113	0.5309	-0.1528	0.0412	-0.0536	0.0868
SBS36	0.8375	0.3133	0.876	0.9866	0.0482	0.0249	0.2155	0.6147	0.1944	0.0167	-0.0291	0.5798	0.2257	0.6746	-0.0475	-0.0613	0.0587	0.3681	0.0465	0.1016	-0.0672	0.8637	0.0015	0.1053	-0.1092	-0.0767	-0.0514	0.524	0.1384	-0.0966	-0.0197	-0.1018	0.5701	-0.079	-0.0372	-0.0059	0.1089	0.5885	0.025	-0.0586	-0.022	-0.0314	-0.052	-0.0409	0.4477	0.0846	0.8055	0.1217	0.8141
SBS37	-0.123	-0.176	-0.1773	-0.1427	-0.0627	-0.0827	0.0307	-0.2847	0.4216	-0.1145	-0.1063	-0.1175	0.403	-0.0484	-0.1428	0.643	-0.111	-0.1652	-0.0575	0.5805	0.1157	-0.1889	-0.0928	-0.0208	0.4055	-0.1566	-0.1414	-0.2577	0.0045	0.5794	-0.1085	0.1842	-0.1567	-0.1649	-0.0726	-0.0637	0.0764	-0.2678	0.3987	-0.1419	-0.0985	-0.1046	0.0877	0.334	-0.2551	0.3996	-0.0583	-0.0379	0.0291
SBS38	0.706	0.5004	0.4102	0.3446	-0.012	-0.0173	0.1788	0.4842	0.003	0.1289	-0.0261	0.3741	0.0053	0.0456	-0.0403	0.003	-0.0221	0.2619	0.0333	0.0543	-0.0412	0.4498	0.015	0.3057	-0.0629	-0.0483	-0.0453	0.4022	0.0509	-0.0319	-0.0311	-0.0572	0.3822	-0.0793	-0.0319	-0.0142	0.2557	0.6826	-0.0524	-0.0328	-0.022	-0.0303	-0.0374	-0.0082	0.3635	-0.0718	0.0606	-0.0084	0.1636
SBS39	-0.0839	-0.1211	-0.1023	-0.0982	-0.146	-0.0172	0.6923	-0.0237	-0.0238	-0.1731	-0.1235	-0.0741	-0.192	-0.0961	-0.1365	-0.1587	0.4946	-0.1778	-0.1594	-0.0317	-0.0988	-0.0824	-0.1051	-0.1621	-0.1459	-0.131	-0.1232	-0.0099	-0.1077	-0.1182	-0.0957	-0.1156	-0.1173	-0.1991	-0.0921	-0.0937	0.5271	-0.0678	0.0297	-0.1367	-0.113	-0.1224	-0.0588	-0.0655	-0.1383	-0.1549	-0.0463	-0.0983	-0.1461
SBS40	0.4438	0.1753	0.3497	0.4258	-0.0527	0.4121	0.6696	0.4283	0.5623	-0.0615	0.3584	0.5083	0.299	0.2119	0.3603	0.1581	0.3158	0.185	-0.0316	0.5192	0.1134	0.4111	0.3627	0.1589	-0.1166	-0.1926	0.2591	0.3247	0.0817	0.0171	-0.1242	0.1474	0.3515	0.3794	-0.2347	0.3575	0.6126	0.3871	0.5562	-0.0687	0.3834	0.3385	0.153	0.046	0.329	0.177	0.2696	0.0562	0.3298
SBS41	-0.1169	-0.1515	-0.1502	-0.1002	-0.0408	0.0523	0.097	-0.2567	0.1083	-0.0633	-0.0352	-0.0079	0.4468	0.0203	-0.0695	0.1337	0.2468	-0.1139	-0.0447	0.1857	0.0519	-0.148	-0.05	-0.0999	0.005	-0.0124	-0.0734	-0.2333	0.081	0.039	-0.0185	0.3853	-0.1895	-0.0578	-0.0353	0.0136	0.0344	-0.2148	0.1152	-0.0463	-0.0211	-0.0449	0.4472	0.1173	-0.102	0.4786	-0.0172	0.0538	0.1156
SBS42	0.2019	0.0903	0.1524	0.1591	0.1192	0.0174	0.1311	0.3127	0.3743	0.4095	0.2432	0.1258	-0.0452	0.0999	0.5965	0.0167	-0.0655	0.507	0.5849	0.1071	-0.0799	0.1239	0.6596	0.4325	0.0472	0.006	0.7363	0.2753	0.1043	0.0264	0.0785	-0.1291	0.1369	0.4445	-0.0789	0.0117	0.2777	0.2326	0.3434	0.4351	0.175	0.3248	-0.0629	0.0044	0.1077	-0.0759	0.1229	0.0447	0.1241
SBS43	-0.0711	-0.0875	-0.0699	-0.0695	-0.113	-0.0693	0.0761	-0.1529	-0.1435	-0.1241	-0.0853	-0.0861	-0.0411	-0.0665	-0.1081	-0.007	-0.0724	-0.1243	-0.0603	-0.0992	0.0519	-0.0312	-0.1178	-0.071	-0.0664	-0.093	-0.1026	-0.1138	-0.0859	-0.0344	-0.0371	0.0416	-0.0636	-0.1136	-0.0649	-0.0555	-0.0373	-0.1163	-0.1404	-0.1137	-0.0769	-0.0863	-0.0566	-0.0587	-0.1002	-0.0171	-0.0428	-0.0649	-0.0768
SBS44	0.2194	0.094	0.0806	0.0711	0.2509	-0.0628	0.1067	0.1215	0.4598	0.6786	-0.0583	0.1222	0.0576	0.0383	0.1905	0.2499	-0.081	0.6821	0.5611	0.1626	-0.0645	0.0083	0.3846	0.768	0.2158	-0.1124	0.3214	0.0447	0.1255	0.2901	-0.0246	-0.0479	0.0739	0.3077	0.0972	-0.0671	0.1605	0.1247	0.4446	0.5986	-0.0626	-0.0489	0.0261	0.0612	-0.0117	0.0056	0.0557	-0.0116	0.1681
SBS45	0.819	0.5746	0.5278	0.5056	-0.0107	-0.0314	0.202	0.6753	-0.0016	0.1616	-0.0581	0.4603	0.0066	0.1525	-0.0744	-0.0206	-0.0085	0.3557	0.028	0.043	-0.0779	0.5207	0.0021	0.3884	-0.0936	-0.0579	-0.0739	0.4734	0.0465	-0.0553	-0.0404	-0.0955	0.4325	-0.131	-0.042	-0.0353	0.2887	0.8429	-0.082	-0.052	-0.0518	-0.0606	-0.0437	-0.0303	0.4525	-0.0906	0.1943	0.0016	0.3024
SBS46	-0.0113	-0.0389	-0.0654	-0.0343	0.0115	0.0128	0.0565	-0.0854	0.4748	0.0183	0.0357	-0.0034	0.2187	-0.0422	-0.0031	0.7614	-0.0514	-0.0202	0.0675	0.4827	0.2102	-0.0526	0.0353	0.2571	0.5039	-0.1082	-0.0123	-0.1025	0.09	0.621	-0.04	0.0595	-0.0349	0.05	-0.0575	0.018	0.1565	-0.0951	0.3698	-0.0493	0.0289	0.0332	0.0618	0.3596	-0.1121	0.1951	-0.0388	-0.058	0.0683
SBS47	0.0407	0.0221	-0.0062	0.0095	-0.0422	0.1619	0.0234	0.0068	-0.0085	-0.1239	0.1412	0.208	0.1163	-0.0299	0.1092	-0.0726	-0.0414	-0.0771	-0.0597	0.0078	0.0169	0.0529	-0.0196	-0.1138	-0.0872	0.0854	-0.0423	-0.0321	0.0976	-0.1037	0.2686	-0.0403	0.1071	0.0828	-0.0598	0.1805	-0.0538	0.0756	-0.0228	-0.0961	0.1581	0.1426	0.0239	0.0408	0.1657	0.0669	-0.0283	0.0724	0.0308
SBS48	0.0364	0.6179	0.0524	0.0934	-0.0424	-0.0207	-0.164	0.0229	-0.1112	-0.0557	-0.0369	-0.0779	-0.0987	-0.011	-0.0455	-0.0789	-0.008	-0.0658	-0.0469	-0.0804	-0.0393	0.0642	-0.0595	-0.064	-0.0623	-0.0465	-0.0415	0.0439	-0.1283	-0.0809	-0.0297	-0.0534	0.0284	-0.065	-0.0286	-0.0228	-0.176	0.0419	-0.1199	-0.0479	-0.0319	-0.0383	-0.0471	-0.0337	-0.0491	-0.0857	0.004	-0.0296	-0.0016
SBS49	0.3195	0.5151	0.1787	0.1699	-0.0478	-0.036	-0.0417	0.2121	-0.1156	0.012	-0.0487	0.0959	-0.0953	-0.0131	-0.0589	-0.0582	-0.0311	0.0098	-0.0348	-0.0544	-0.0599	0.2536	-0.0449	0.073	-0.0721	-0.0566	-0.057	0.2609	-0.0727	-0.0877	-0.0385	-0.0711	0.2111	-0.0911	-0.0356	-0.0312	-0.0058	0.3738	-0.1168	-0.0526	-0.0427	-0.0506	-0.0553	-0.0314	0.1323	-0.1116	0.0066	-0.0336	0.0258
SBS50	0.1226	0.174	0.0811	0.0744	0.0451	0.2557	0.278	0.2362	0.131	-0.0701	0.4018	0.3862	-0.0241	0.0056	0.2993	-0.0376	-0.0217	0.0531	-0.0093	0.084	-0.0078	0.1665	0.1232	-0.0708	-0.0853	-0.1248	0.0404	0.1682	-0.0745	-0.0769	-0.0405	-0.0669	0.4129	0.22	-0.0282	0.2682	0.1953	0.2376	0.1221	-0.0421	0.4157	0.3343	-0.057	-0.0075	0.3528	-0.1265	-0.0142	0.1132	0.002
SBS51	0.1109	0.0414	0.0276	0.0711	0.0119	0.0362	0.2104	0.1184	0.1083	-0.0641	-0.0309	0.3203	0.0345	-0.0434	-0.0143	0.0169	-0.0463	-0.0634	-0.083	0.0613	-0.0227	0.1304	-0.0138	-0.0446	-0.0796	0.0618	-0.0567	0.0295	0.1074	-0.0815	0.165	-0.0381	0.2418	-0.0031	-0.0174	0.0451	0.1195	0.1481	0.0608	-0.0245	-0.023	-0.0065	-0.012	-0.0162	0.2704	-0.0586	-0.0292	0.0041	-0.0153
SBS52	0.4262	0.435	0.4095	0.6359	0.0091	-0.0023	0.0346	0.3108	0.0639	-0.0466	-0.0439	0.2612	0.1139	0.1731	-0.0551	-0.0461	0.0699	-0.0012	-0.0253	0.0272	-0.0503	0.3957	-0.0391	-0.0391	-0.076	-0.0497	-0.0479	0.2502	-0.0355	-0.0776	-0.0214	-0.0656	0.212	-0.0916	-0.0329	-0.0289	-0.0183	0.3266	-0.0529	-0.057	-0.04	-0.0403	-0.047	-0.0088	0.2244	0.0335	0.2363	-0.0068	0.3282
SBS53	0.4241	0.3291	0.1994	0.1863	-0.0112	-0.02	0.0809	0.2695	-0.0263	0.0113	-0.014	0.1691	-0.0537	-0.0325	-0.0279	0.0177	-0.0327	-0.0402	-0.0045	0.0454	-0.0459	0.3104	0.0164	0.0477	-0.0385	-0.0436	-0.016	0.3366	0.0115	-0.0438	-0.0249	-0.0543	0.2268	-0.0443	-0.0174	-0.0149	0.1484	0.4241	-0.037	-0.0201	-0.0171	-0.0108	-0.053	0.0074	0.1792	-0.0894	-0.0296	-0.0178	-0.0009
SBS54	-0.041	-0.0566	-0.0635	-0.048	0.0065	-0.0625	-0.0599	-0.0599	0.3651	0.1463	-0.0697	-0.0833	0.1142	-0.0304	-0.0786	0.5515	-0.0592	-0.0406	0.0417	0.3414	0.0355	-0.0595	-0.0269	0.4983	0.2884	-0.0702	-0.0671	-0.1199	0.0918	0.4945	-0.0476	0.0612	-0.0152	-0.0709	-0.018	-0.0527	0.0146	-0.0935	0.3951	-0.0119	-0.0675	-0.0677	-0.0549	-0.0081	-0.1285	0.0671	-0.0156	-0.0562	0.0635
SBS55	-0.0658	-0.0777	-0.0707	-0.0646	-0.0635	-0.0029	0.0998	-0.1147	-0.0832	-0.0719	-0.0246	-0.0642	-0.018	-0.0172	-0.0347	-0.1058	-0.0368	-0.0788	-0.0559	-0.0967	-0.0174	-0.0373	-0.0605	-0.0687	-0.0694	-0.0213	-0.0545	-0.1081	0.0224	-0.0859	-0.0432	0.0489	-0.0821	-0.0288	-0.0335	0.0062	-0.0059	-0.0904	-0.0532	-0.056	-0.0237	-0.0172	-0.0429	0.0075	-0.0864	-0.0149	-0.0208	0.0093	-0.0598
SBS56	0.6773	0.133	0.6204	0.8644	0.0361	-0.0047	0.139	0.3567	0.1869	-0.0001	-0.0507	0.4631	0.317	0.7914	-0.0632	-0.0466	0.04	0.2833	0.0227	0.0964	-0.0379	0.6248	-0.0234	0.0735	-0.0725	-0.0403	-0.0579	0.2204	0.1468	-0.053	-0.0119	-0.022	0.3007	-0.0952	-0.0348	-0.0339	0.0138	0.3567	0.037	-0.0525	-0.0464	-0.0499	-0.0296	-0.028	0.3098	0.1974	0.9365	0.1557	0.9293
SBS57	-0.0115	-0.0485	-0.065	0.002	0.0573	0.0824	0.1176	-0.0831	0.3061	0.0081	0.0994	0.0825	0.3934	0.0651	0.1273	0.222	-0.0046	0.016	-0.0231	0.2646	0.0934	-0.059	0.125	0.0259	0.0453	-0.0733	0.0825	-0.1268	0.0955	0.106	-0.0339	0.3778	-0.0523	0.1005	0.0168	0.0802	0.1397	-0.079	0.309	0.0264	0.0848	0.1333	0.3333	0.0952	-0.044	0.3885	0.0025	0.1008	0.0858
SBS58	0.0456	-0.0365	-0.0349	0.0199	0.0874	0.3986	0.2218	0.0326	0.3402	0.0023	0.21	0.2159	0.1428	0.0824	0.3079	0.1335	0.0464	0.0746	-0.0164	0.3894	0.0499	0.0163	0.1961	0.0527	-0.0105	-0.0386	0.0921	-0.0557	0.1712	0.0623	0.0132	0.0067	0.0911	0.2978	-0.0106	0.4027	0.1814	0.0219	0.4518	0.0635	0.2176	0.2862	0.0299	0.0906	0.0464	0.0542	0.0452	0.237	0.0608
SBS59	0.1207	-0.032	0.5378	0.2095	-0.0354	-0.0359	0.0414	0.221	0.0173	-0.021	-0.0469	0.1689	0.0069	-0.0117	-0.0514	-0.061	-0.0357	0.3118	0.0927	-0.0203	0.0083	0.3815	-0.033	-0.002	-0.0552	-0.0578	-0.0484	0.4378	-0.0047	-0.0695	-0.0136	-0.0332	0.4554	-0.0225	-0.0347	-0.0294	-0.0021	0.133	-0.0386	-0.0517	-0.0411	-0.0478	-0.0469	-0.0399	0.185	-0.0027	-0.0024	-0.0297	0.0117
SBS60	-0.0482	-0.046	-0.0459	-0.0423	-0.0505	-0.0275	0.0933	-0.0935	-0.0909	-0.0561	-0.0305	-0.0633	-0.0273	-0.0253	-0.04	-0.0911	-0.0314	-0.0571	-0.0346	-0.1177	-0.0037	-0.0127	-0.044	-0.0591	-0.0614	-0.0459	-0.0395	-0.0658	-0.0331	-0.0759	-0.0222	0.0151	-0.0523	-0.0436	-0.023	-0.0214	-0.0073	-0.0704	-0.0774	-0.0432	-0.0299	-0.0288	-0.0178	-0.0245	-0.0726	-0.0222	-0.0191	-0.0167	-0.0513
SBS84	-0.0527	-0.0559	-0.0754	-0.0625	0.1243	0.0012	0.1778	-0.0079	0.3372	0.4191	0.1632	-0.0525	-0.0719	-0.0252	0.4969	-0.0306	-0.0503	0.4223	0.5223	0.02	-0.0754	-0.0835	0.6851	0.392	0.0161	-0.1134	0.6633	0.0478	-0.0478	-0.0005	-0.0151	-0.0974	-0.0511	0.4176	-0.0377	-0.0067	0.2185	-0.0746	0.3464	0.5063	0.1149	0.2195	-0.0562	0.0554	-0.1171	-0.0463	-0.0243	0.0291	-0.0448
SBS85	-0.1066	-0.157	-0.147	-0.1113	-0.0963	0.0401	-0.0448	-0.2243	0.1695	-0.1793	-0.0395	0.1205	0.2602	-0.05	-0.0627	0.2561	-0.0595	-0.1577	-0.1025	0.2413	-0.042	-0.1437	-0.0904	-0.1529	0.2303	0.113	-0.1223	-0.2261	0.1901	0.2193	0.2245	-0.0193	-0.1572	-0.0855	-0.096	0.0588	-0.055	-0.1618	0.1438	-0.1602	-0.0253	-0.0297	0.4194	0.3897	0.0773	0.2684	-0.0413	0.0012	0.0617
SBS86	-0.0748	-0.0793	-0.0637	-0.0496	-0.0113	0.0877	0.5126	-0.0584	-0.0611	-0.0814	-0.0349	-0.1038	-0.1833	-0.0205	-0.0622	-0.1941	0.5291	-0.0941	-0.0905	-0.0814	-0.0958	-0.0572	-0.0558	-0.1428	-0.1081	-0.1317	-0.0798	-0.0028	-0.0971	-0.1183	-0.0745	-0.1305	-0.0977	-0.1013	0.0264	0.0012	0.34	-0.0944	-0.0082	-0.0441	-0.0231	-0.0507	-0.0807	-0.0511	-0.1695	-0.1555	-0.0095	-0.0045	-0.0936
SBS87	-0.0566	0.1064	-0.0622	0.0086	0.7133	-0.0111	-0.2093	-0.0887	-0.0226	0.4674	0.0489	-0.0285	-0.0885	0.1002	-0.0062	-0.1405	-0.0275	0.1122	0.031	-0.166	-0.0273	-0.0069	0.085	0.1326	0.0434	-0.049	-0.0166	-0.1013	0.015	-0.0274	-0.002	-0.0896	0.0739	0.0293	0.757	-0.0194	-0.2634	-0.09	-0.0204	0.4976	0.0018	0.0436	-0.047	-0.0349	-0.131	-0.1183	-0.0304	0.1971	-0.0408
SBS88	-0.07	-0.1296	-0.081	-0.0414	-0.0091	-0.0748	0.0166	-0.1829	0.3106	-0.0832	-0.0875	0.1196	0.4138	0.0434	-0.1218	0.1993	-0.0703	-0.1101	-0.0588	0.5065	-0.0146	-0.081	-0.0494	-0.0755	0.0497	-0.0228	-0.1073	-0.1619	0.0872	0.2001	-0.0027	0.2565	-0.0932	-0.1358	-0.0091	-0.0663	0.0151	-0.1573	0.3657	-0.0777	-0.0834	-0.0921	0.3234	0.1186	0.0163	0.4187	0.0108	0.0422	0.0952
SBS89	0.2495	0.0611	0.1362	0.1855	-0.0348	0.0311	0.6105	0.3783	0.2564	-0.0398	-0.017	0.4647	-0.0533	0.0227	0.0861	-0.0775	0.2299	0.0894	-0.0936	0.1562	-0.1096	0.2042	0.1107	0.0924	-0.181	0.3109	0.0485	0.149	0.4237	-0.1249	0.2173	-0.1495	0.1949	0.1388	-0.0987	-0.0161	0.5168	0.3723	0.2718	0.0023	-0.0109	0.0084	-0.0661	-0.0728	0.3817	-0.1466	0.1066	-0.0724	0.0631
SBS90	-0.0689	-0.0788	-0.0754	-0.0625	-0.0735	-0.043	-0.0492	-0.0896	-0.0674	-0.1142	-0.0542	0.148	0.1095	-0.0512	-0.0775	-0.0754	-0.0486	-0.1107	-0.0987	-0.0541	-0.0098	-0.0749	-0.0814	-0.1221	-0.0799	0.2651	-0.0752	-0.1321	0.2641	-0.1099	0.3895	-0.0216	-0.1221	-0.0726	-0.0393	-0.0325	-0.0815	-0.0278	-0.1215	-0.0868	-0.0491	-0.0582	0.3892	0.013	0.1726	0.1327	-0.0259	-0.0394	-0.0246
SBS91	0.3129	0.5466	0.3236	0.5257	0.0067	0.0552	-0.0254	0.2436	0.0345	-0.0596	-0.0139	0.1751	0.0557	0.1891	-0.0471	-0.0717	0.0599	-0.0122	-0.0356	0.0002	-0.0498	0.3214	-0.0304	-0.0655	-0.0937	-0.0603	-0.0359	0.1967	-0.0608	-0.1044	-0.0223	-0.0743	0.1807	-0.0226	-0.0367	0.0321	-0.0892	0.2298	-0.0524	-0.0448	0.0016	-0.028	-0.0546	-0.0267	0.148	0.0015	0.2528	-0.001	0.298
SBS92	0.1211	0.03	0.037	0.086	0.1383	0.1657	0.2577	0.1836	0.7626	0.1198	0.2605	0.2122	0.1585	0.0154	0.3472	0.5602	0.1581	0.1297	0.0794	0.8019	-0.0705	0.062	0.4984	0.2935	0.2512	-0.008	0.3829	0.0316	0.2866	0.489	0.0076	-0.136	0.1022	0.3183	-0.0353	0.1268	0.409	0.138	0.8023	0.0892	0.202	0.3746	-0.0158	0.1417	0.0536	0.0493	0.0424	0.0152	0.1331
SBS93	-0.0311	-0.1126	-0.1037	-0.0573	0.0111	0.0112	0.1038	-0.1703	0.1963	-0.0554	-0.0423	0.0318	0.5819	0.0416	-0.0915	0.2285	0.1216	-0.0909	-0.0976	0.3371	0.2876	-0.1141	-0.0634	-0.0943	0.0443	0.0232	-0.107	-0.2039	0.1237	0.1195	-0.0035	0.4068	-0.1011	-0.0956	0.0109	-0.01	0.1095	-0.1221	0.16	-0.0657	-0.0329	-0.0507	0.2879	0.1106	-0.0397	0.5654	0.0006	0.0642	0.1035
SBS94	0.578	0.3692	0.3729	0.3379	0.1616	0.0333	0.3475	0.6921	0.2114	0.2194	0.1265	0.5778	0.0085	-0.0095	0.1676	0.0628	0.0162	0.275	0.0959	0.2004	-0.064	0.4023	0.2611	0.3123	-0.077	-0.0266	0.1491	0.5115	0.1308	-0.0222	0.0314	-0.1502	0.4839	0.0685	0.0878	0.0234	0.5085	0.7868	0.1432	0.0903	0.0992	0.1646	0.0683	0.054	0.5431	-0.0973	0.014	-0.0266	0.136
[truncated: 63 more columns]

## Sheet: Table S5 p-value
Supplemental Tabel S5. Peason's Correlation Coefficient (p-value)
	Y4tumor	rpsL	TOY	MAP	Signature_1	Signature_2	Signature_3	Signature_4	Signature_5	Signature_6	Signature_7	Signature_8	Signature_9	Signature_10	Signature_11	Signature_12	Signature_13	Signature_14	Signature_15	Signature_16	Signature_17	Signature_18	Signature_19	Signature_20	Signature_21	Signature_22	Signature_23	Signature_24	Signature_25	Signature_26	Signature_27	Signature_28	Signature_29	Signature_30	SBS1	SBS2	SBS3	SBS4	SBS5	SBS6	SBS7a	SBS7b	SBS7c	SBS7d	SBS8	SBS9	SBS10a	SBS10b	SBS10c
Y4tumor	<.0001	<.0001	<.0001	<.0001	0.8335	0.9114	0.0078	<.0001	0.0869	0.2055	0.6333	<.0001	0.0989	<.0001	0.6391	0.932	0.9522	<.0001	0.4577	0.2271	0.4589	<.0001	0.855	0.0009	0.416	0.428	0.6306	<.0001	0.2162	0.6535	0.7241	0.3237	<.0001	0.2861	0.5702	0.8101	0.0144	<.0001	0.8821	0.664	0.6588	0.6804	0.6949	0.8825	<.0001	0.9092	<.0001	0.4697	<.0001
rpsL	<.0001	<.0001	0.0005	0.0006	0.5962	0.9011	0.8683	<.0001	0.8199	0.2038	0.0224	0.0885	0.3067	0.953	0.2529	0.4663	0.8487	0.012	0.9417	0.7568	0.4908	0.0007	0.9356	0.0201	0.4243	0.356	0.8018	0.0006	0.3816	0.4394	0.6308	0.2663	0.0017	0.5114	0.8637	0.9476	0.8084	<.0001	0.7404	0.854	0.0304	0.0975	0.6453	0.6161	0.078	0.1172	0.9829	0.9863	0.3774
TOY	<.0001	0.0005	<.0001	<.0001	0.9	0.7813	0.0671	<.0001	0.2414	0.7679	0.6175	<.0001	0.1817	<.0001	0.4434	0.4015	0.9554	<.0001	0.5879	0.6964	0.4503	<.0001	0.6936	0.1569	0.2532	0.3623	0.3763	<.0001	0.3659	0.2651	0.7994	0.2761	<.0001	0.3164	0.6485	0.6857	0.3226	<.0001	0.6667	0.4195	0.6757	0.5676	0.4845	0.5325	<.0001	0.9416	<.0001	0.583	<.0001
MAP	<.0001	0.0006	<.0001	<.0001	0.2247	0.9731	0.0607	<.0001	0.0495	0.518	0.6761	<.0001	0.0206	<.0001	0.5485	0.5649	0.7245	0.0005	0.5028	0.3616	0.5139	<.0001	0.9144	0.3092	0.2984	0.3996	0.5759	<.0001	0.2056	0.3557	0.8301	0.3845	<.0001	0.401	0.6627	0.808	0.4033	<.0001	0.8375	0.9956	0.709	0.6599	0.649	0.7073	<.0001	0.3976	<.0001	0.2618	<.0001
Signature_1	0.8335	0.5962	0.9	0.2247	<.0001	0.4696	0.1431	0.8121	0.0066	<.0001	0.0853	0.3117	0.9929	0.0276	0.0869	0.9518	0.7098	<.0001	<.0001	0.8908	0.9023	0.5568	0.0006	0.0027	0.2114	0.3318	0.0677	0.955	0.3146	0.1865	0.7842	0.4259	0.0633	0.0063	<.0001	0.5482	0.1303	0.6119	0.0329	<.0001	0.22	0.1119	0.5094	0.9526	0.3288	0.379	0.6397	0.0025	0.4763
Signature_2	0.9114	0.9011	0.7813	0.9731	0.4696	<.0001	0.5627	0.598	0.5375	0.885	<.0001	0.8136	0.5867	0.3645	0.0018	0.9857	0.0003	0.5966	0.9752	0.1824	0.7683	0.8436	0.1434	0.9808	0.707	0.5279	0.5014	0.4543	0.7305	0.9139	0.8982	0.7267	0.9117	<.0001	0.9145	<.0001	0.763	0.6404	0.0195	0.8143	<.0001	0.0073	0.9621	0.7397	0.3982	0.4507	0.8439	0.0206	0.9652
Signature_3	0.0078	0.8683	0.0671	0.0607	0.1431	0.5627	<.0001	0.0001	0.0003	0.2017	0.7844	<.0001	0.9369	0.8229	0.5838	0.7446	<.0001	0.517	0.2866	0.0024	0.9492	0.0278	0.1756	0.5652	0.139	0.7961	0.6833	0.0237	0.0692	0.5611	0.5595	0.6016	0.0271	0.8062	0.0308	0.8811	<.0001	0.0009	0.0018	0.1946	0.79	0.6132	0.5398	0.7872	0.0003	0.4376	0.2324	0.3314	0.3027
Signature_4	<.0001	<.0001	<.0001	<.0001	0.8121	0.598	0.0001	<.0001	0.1191	0.7108	0.8386	<.0001	0.4761	0.0877	0.9956	0.5258	0.728	0.0045	0.8872	0.2772	0.1731	<.0001	0.2702	0.0329	0.0891	0.172	0.7042	<.0001	0.02	0.1141	0.8821	0.0442	<.0001	0.6417	0.2954	0.5441	<.0001	<.0001	0.8978	0.4059	0.6774	0.7306	0.3472	0.3588	<.0001	0.0344	0.0075	0.6949	0.0026
Signature_5	0.0869	0.8199	0.2414	0.0495	0.0066	0.5375	0.0003	0.1191	<.0001	0.0027	0.0071	0.0014	0.0008	0.1378	0.0003	<.0001	0.4028	0.0025	0.0104	<.0001	0.2932	0.1328	<.0001	<.0001	0.0005	0.7477	0.0002	0.654	0.0011	<.0001	0.6928	0.8937	0.0827	<.0001	0.4942	0.592	<.0001	0.4875	<.0001	0.0069	0.0322	0.0011	0.7627	0.035	0.4318	0.0514	0.0967	0.6538	0.0043
Signature_6	0.2055	0.2038	0.7679	0.518	<.0001	0.885	0.2017	0.7108	0.0027	<.0001	0.6298	0.7567	0.8006	0.3012	0.046	0.6305	0.4086	<.0001	<.0001	0.8079	0.935	0.8352	<.0001	<.0001	0.1193	0.2133	0.0012	0.6807	0.6371	0.0388	0.6993	0.6268	0.1359	0.0066	<.0001	0.8707	0.4281	0.6795	0.0084	<.0001	0.8756	0.6781	0.3148	0.7418	0.2722	0.3591	0.9803	0.1372	0.5556
Signature_7	0.6333	0.0224	0.6175	0.6761	0.0853	<.0001	0.7844	0.8386	0.0071	0.6298	<.0001	0.3976	0.6144	0.1647	<.0001	0.8448	0.5228	0.1728	0.5508	0.2851	0.7033	0.8889	<.0001	0.5721	0.9232	0.5183	<.0001	0.9622	0.9313	0.9764	0.9725	0.6081	0.5818	<.0001	0.8356	<.0001	0.3821	0.6697	0.0007	0.3377	<.0001	<.0001	0.8662	0.7465	0.1875	0.5435	0.8374	0.0004	0.8434
Signature_8	<.0001	0.0885	<.0001	<.0001	0.3117	0.8136	<.0001	<.0001	0.0014	0.7567	0.3976	<.0001	0.1459	0.0051	0.4923	0.9246	0.5801	0.0042	0.811	0.01	0.5395	<.0001	0.4085	0.2176	0.2311	0.0934	0.4503	<.0001	<.0001	0.4952	0.6036	0.2017	<.0001	0.3013	0.71	0.7865	<.0001	<.0001	0.1485	0.6599	0.4484	0.5207	0.065	0.9145	<.0001	0.742	0.0001	0.9139	<.0001
Signature_9	0.0989	0.3067	0.1817	0.0206	0.9929	0.5867	0.9369	0.4761	0.0008	0.8006	0.6144	0.1459	<.0001	0.0047	0.4949	0.0169	0.3799	0.866	0.8385	<.0001	<.0001	0.1771	0.8442	0.7464	0.5239	0.4335	0.5131	0.3343	0.5	0.0851	0.6674	<.0001	0.7017	0.5497	0.7269	0.6258	0.894	0.7068	0.023	0.463	0.599	0.7081	0.1444	0.3051	0.8445	<.0001	0.0047	0.4407	<.0001
Signature_10	<.0001	0.953	<.0001	<.0001	0.0276	0.3645	0.8229	0.0877	0.1378	0.3012	0.1647	0.0051	0.0047	<.0001	0.7825	0.5965	0.9285	0.0081	0.3943	0.5654	0.6283	<.0001	0.776	0.4872	0.9023	0.4828	0.8875	0.2454	0.1518	0.8815	0.8216	0.4534	0.0319	0.9927	0.2361	0.5209	0.3755	0.1017	0.3181	0.401	0.3195	0.3724	0.7196	0.9904	0.2606	0.0565	<.0001	<.0001	<.0001
Signature_11	0.6391	0.2529	0.4434	0.5485	0.0869	0.0018	0.5838	0.9956	0.0003	0.046	<.0001	0.4923	0.4949	0.7825	<.0001	0.9592	0.9826	0.0016	0.0077	0.3495	0.9364	0.5726	<.0001	0.0347	0.9237	0.3959	<.0001	0.7164	0.8782	0.9516	0.9469	0.413	0.5058	<.0001	0.934	0.002	0.0466	0.6285	<.0001	0.0059	<.0001	<.0001	0.8071	0.7254	0.1521	0.4716	0.8165	0.1213	0.769
Signature_12	0.932	0.4663	0.4015	0.5649	0.9518	0.9857	0.7446	0.5258	<.0001	0.6305	0.8448	0.9246	0.0169	0.5965	0.9592	<.0001	0.3387	0.796	0.4034	<.0001	0.4189	0.4382	0.2429	0.001	<.0001	0.3034	0.7681	0.2359	0.1181	<.0001	0.4521	0.6146	0.8229	0.8239	0.2925	0.9074	0.0415	0.4098	<.0001	0.5556	0.8901	0.7242	0.4584	0.0005	0.3517	0.0878	0.6975	0.5535	0.3389
Signature_13	0.9522	0.8487	0.9554	0.7245	0.7098	0.0003	<.0001	0.728	0.4028	0.4086	0.5228	0.5801	0.3799	0.9285	0.9826	0.3387	<.0001	0.5583	0.5841	0.5811	0.6725	0.9353	0.9315	0.3705	0.4049	0.4652	0.7038	0.7241	0.6422	0.6408	0.785	0.5023	0.5711	0.7814	0.7089	0.044	0.0214	0.7156	0.6077	0.5948	0.2402	0.9349	0.9142	0.7028	0.3013	0.4094	0.7916	0.9827	0.8578
Signature_14	<.0001	0.012	<.0001	0.0005	<.0001	0.5966	0.517	0.0045	0.0025	<.0001	0.1728	0.0042	0.866	0.0081	0.0016	0.796	0.5583	<.0001	<.0001	0.9689	0.6997	0.0023	<.0001	<.0001	0.5677	0.1971	0.0007	0.0128	0.518	0.3373	0.7216	0.3348	0.0005	0.0026	0.0027	0.6154	0.5273	0.0034	0.036	<.0001	0.2371	0.1505	0.4604	0.9691	0.148	0.5033	0.0095	0.2756	0.0009
Signature_15	0.4577	0.9417	0.5879	0.5028	<.0001	0.9752	0.2866	0.8872	0.0104	<.0001	0.5508	0.811	0.8385	0.3943	0.0077	0.4034	0.5841	<.0001	<.0001	0.9743	0.7687	0.6935	<.0001	0.0002	0.0206	0.301	<.0001	0.3076	0.933	0.0159	0.8332	0.4968	0.3571	0.0132	0.0011	0.9579	0.5773	0.7391	0.0383	<.0001	0.634	0.634	0.3217	0.9222	0.3181	0.5497	0.601	0.5643	0.4963
Signature_16	0.2271	0.7568	0.6964	0.3616	0.8908	0.1824	0.0024	0.2772	<.0001	0.8079	0.2851	0.01	<.0001	0.5654	0.3495	<.0001	0.5811	0.9689	0.9743	<.0001	0.0566	0.4791	0.0313	0.0197	0.0068	0.9663	0.4184	0.865	0.0068	<.0001	0.6246	0.2214	0.3387	0.2854	0.1488	0.2387	<.0001	0.4443	<.0001	0.3951	0.2762	0.2135	0.7496	0.0771	0.3478	0.0029	0.4293	0.9261	0.0426
Signature_17	0.4589	0.4908	0.4503	0.5139	0.9023	0.7683	0.9492	0.1731	0.2932	0.935	0.7033	0.5395	<.0001	0.6283	0.9364	0.4189	0.6725	0.6997	0.7687	0.0566	<.0001	0.4795	0.7022	0.9074	0.879	0.5921	0.7048	0.2318	0.9955	0.7211	0.5842	<.0001	0.3342	0.7482	0.9084	0.7066	0.776	0.1979	0.7855	0.7144	0.7131	0.8174	0.7094	0.8891	0.2309	<.0001	0.8588	0.6246	0.2964
Signature_18	<.0001	0.0007	<.0001	<.0001	0.5568	0.8436	0.0278	<.0001	0.1328	0.8352	0.8889	<.0001	0.1771	<.0001	0.5726	0.4382	0.9353	0.0023	0.6935	0.4791	0.4795	<.0001	0.9537	0.4553	0.2171	0.404	0.5069	<.0001	0.2418	0.203	0.7551	0.2505	<.0001	0.5353	0.9112	0.9606	0.1793	<.0001	0.9694	0.6374	0.9588	0.7648	0.4393	0.611	<.0001	0.9131	<.0001	0.3655	<.0001
Signature_19	0.855	0.9356	0.6936	0.9144	0.0006	0.1434	0.1756	0.2702	<.0001	<.0001	<.0001	0.4085	0.8442	0.776	<.0001	0.2429	0.9315	<.0001	<.0001	0.0313	0.7022	0.9537	<.0001	0.0001	0.5706	0.3844	<.0001	0.8031	0.526	0.4179	0.9498	0.2589	0.8124	<.0001	0.1453	0.2043	0.0018	0.6697	<.0001	<.0001	0.0009	<.0001	0.8746	0.4743	0.751	0.6297	0.9527	0.4989	0.8484
Signature_20	0.0009	0.0201	0.1569	0.3092	0.0027	0.9808	0.5652	0.0329	<.0001	<.0001	0.5721	0.2176	0.7464	0.4872	0.0347	0.001	0.3705	<.0001	0.0002	0.0197	0.9074	0.4553	0.0001	<.0001	0.109	0.1875	0.0024	0.5754	0.3123	0.0005	0.5759	0.7522	0.1072	0.018	0.0977	0.9652	0.0974	0.0137	<.0001	<.0001	0.7638	0.4765	0.4768	0.7946	0.8976	0.6681	0.7766	0.4321	0.0978
Signature_21	0.416	0.4243	0.2532	0.2984	0.2114	0.707	0.139	0.0891	0.0005	0.1193	0.9232	0.2311	0.5239	0.9023	0.9237	<.0001	0.4049	0.5677	0.0206	0.0068	0.879	0.2171	0.5706	0.109	<.0001	0.3669	0.7451	0.1255	0.3413	<.0001	0.5766	0.7174	0.5653	0.9274	0.5545	0.8052	0.8848	0.0701	0.0061	0.3742	0.8319	0.8805	0.7191	<.0001	0.0846	0.8012	0.647	0.8408	0.7534
Signature_22	0.428	0.356	0.3623	0.3996	0.3318	0.5279	0.7961	0.172	0.7477	0.2133	0.5183	0.0934	0.4335	0.4828	0.3959	0.3034	0.4652	0.1971	0.301	0.9663	0.5921	0.404	0.3844	0.1875	0.3669	<.0001	0.467	0.3146	<.0001	0.245	0.0003	0.6102	0.1884	0.5797	0.6	0.6149	0.7155	0.1737	0.159	0.3341	0.5342	0.551	0.5551	0.5648	0.0011	0.4137	0.7327	0.5061	0.4339
Signature_23	0.6306	0.8018	0.3763	0.5759	0.0677	0.5014	0.6833	0.7042	0.0002	0.0012	<.0001	0.4503	0.5131	0.8875	<.0001	0.7681	0.7038	0.0007	<.0001	0.4184	0.7048	0.5069	<.0001	0.0024	0.7451	0.467	<.0001	0.7624	0.9089	0.9377	0.9911	0.3831	0.4931	<.0001	0.9742	0.5791	0.0107	0.7299	0.0001	<.0001	0.0047	<.0001	0.738	0.9414	0.2211	0.6094	0.7997	0.7893	0.7402
Signature_24	<.0001	0.0006	<.0001	<.0001	0.955	0.4543	0.0237	<.0001	0.654	0.6807	0.9622	<.0001	0.3343	0.2454	0.7164	0.2359	0.7241	0.0128	0.3076	0.865	0.2318	<.0001	0.8031	0.5754	0.1255	0.3146	0.7624	<.0001	0.698	0.0733	0.6784	0.0743	<.0001	0.9039	0.5095	0.5006	0.0389	<.0001	0.7292	0.9689	0.732	0.5319	0.2053	0.4749	<.0001	0.0562	0.0928	0.8965	0.1049
Signature_25	0.2162	0.3816	0.3659	0.2056	0.3146	0.7305	0.0692	0.02	0.0011	0.6371	0.9313	<.0001	0.5	0.1518	0.8782	0.1181	0.6422	0.518	0.933	0.0068	0.9955	0.2418	0.526	0.3123	0.3413	<.0001	0.9089	0.698	<.0001	0.1525	0.0024	0.5401	0.5883	0.522	0.5345	0.8674	0.0241	0.0342	0.0468	0.6915	0.9168	0.9514	0.4065	0.5615	0.0001	0.896	0.1028	0.5787	0.0738
Signature_26	0.6535	0.4394	0.2651	0.3557	0.1865	0.9139	0.5611	0.1141	<.0001	0.0388	0.9764	0.4952	0.0851	0.8815	0.9516	<.0001	0.6408	0.3373	0.0159	<.0001	0.7211	0.203	0.4179	0.0005	<.0001	0.245	0.9377	0.0733	0.1525	<.0001	0.5652	0.8524	0.6119	0.9631	0.5873	0.9673	0.5421	0.0996	<.0001	0.4251	0.9819	0.852	0.6577	0.0008	0.0617	0.2865	0.6712	0.9135	0.4501
Signature_27	0.7241	0.6308	0.7994	0.8301	0.7842	0.8982	0.5595	0.8821	0.6928	0.6993	0.9725	0.6036	0.6674	0.8216	0.9469	0.4521	0.785	0.7216	0.8332	0.6246	0.5842	0.7551	0.9498	0.5759	0.5766	0.0003	0.9911	0.6784	0.0024	0.5652	<.0001	0.5003	0.6356	0.7594	0.8376	0.8523	0.5485	0.7006	0.5575	0.9193	0.952	0.9609	0.739	0.736	0.3071	0.6454	0.9721	0.833	0.6974
Signature_28	0.3237	0.2663	0.2761	0.3845	0.4259	0.7267	0.6016	0.0442	0.8937	0.6268	0.6081	0.2017	<.0001	0.4534	0.413	0.6146	0.5023	0.3348	0.4968	0.2214	<.0001	0.2505	0.2589	0.7522	0.7174	0.6102	0.3831	0.0743	0.5401	0.8524	0.5003	<.0001	0.1582	0.5266	0.5939	0.8337	0.3623	0.0826	0.8885	0.3777	0.6711	0.5348	0.5148	0.6298	0.0984	<.0001	0.8338	0.3886	0.4404
Signature_29	<.0001	0.0017	<.0001	<.0001	0.0633	0.9117	0.0271	<.0001	0.0827	0.1359	0.5818	<.0001	0.7017	0.0319	0.5058	0.8229	0.5711	0.0005	0.3571	0.3387	0.3342	<.0001	0.8124	0.1072	0.5653	0.1884	0.4931	<.0001	0.5883	0.6119	0.6356	0.1582	<.0001	0.5464	0.2388	0.8935	0.0739	<.0001	0.6064	0.6066	0.652	0.5567	0.2233	0.8614	<.0001	0.2112	0.0176	0.5008	0.0036
Signature_30	0.2861	0.5114	0.3164	0.401	0.0063	<.0001	0.8062	0.6417	<.0001	0.0066	<.0001	0.3013	0.5497	0.9927	<.0001	0.8239	0.7814	0.0026	0.0132	0.2854	0.7482	0.5353	<.0001	0.018	0.9274	0.5797	<.0001	0.9039	0.522	0.9631	0.7594	0.5266	0.5464	<.0001	0.4447	<.0001	0.3607	0.2846	<.0001	<.0001	<.0001	<.0001	0.584	0.7774	0.0493	0.4778	0.5879	0.2216	0.4936
SBS1	0.5702	0.8637	0.6485	0.6627	<.0001	0.9145	0.0308	0.2954	0.4942	<.0001	0.8356	0.71	0.7269	0.2361	0.934	0.2925	0.7089	0.0027	0.0011	0.1488	0.9084	0.9112	0.1453	0.0977	0.5545	0.6	0.9742	0.5095	0.5345	0.5873	0.8376	0.5939	0.2388	0.4447	<.0001	0.873	0.0115	0.2787	0.9181	<.0001	0.9606	0.9929	0.5941	0.638	0.2237	0.3429	0.8578	0.0616	0.904
SBS2	0.8101	0.9476	0.6857	0.808	0.5482	<.0001	0.8811	0.5441	0.592	0.8707	<.0001	0.7865	0.6258	0.5209	0.002	0.9074	0.044	0.6154	0.9579	0.2387	0.7066	0.9606	0.2043	0.9652	0.8052	0.6149	0.5791	0.5006	0.8674	0.9673	0.8523	0.8337	0.8935	<.0001	0.873	<.0001	0.4414	0.6176	0.0335	0.881	<.0001	0.0103	0.9361	0.685	0.463	0.4957	0.9686	0.0302	0.8294
SBS3	0.0144	0.8084	0.3226	0.4033	0.1303	0.763	<.0001	<.0001	<.0001	0.4281	0.3821	<.0001	0.894	0.3755	0.0466	0.0415	0.0214	0.5273	0.5773	<.0001	0.776	0.1793	0.0018	0.0974	0.8848	0.7155	0.0107	0.0389	0.0241	0.5421	0.5485	0.3623	0.0739	0.3607	0.0115	0.4414	<.0001	<.0001	0.0001	0.2523	0.7385	0.0467	0.5325	0.7331	0.0001	0.4131	0.9856	0.1511	0.8495
SBS4	<.0001	<.0001	<.0001	<.0001	0.6119	0.6404	0.0009	<.0001	0.4875	0.6795	0.6697	<.0001	0.7068	0.1017	0.6285	0.4098	0.7156	0.0034	0.7391	0.4443	0.1979	<.0001	0.6697	0.0137	0.0701	0.1737	0.7299	<.0001	0.0342	0.0996	0.7006	0.0826	<.0001	0.2846	0.2787	0.6176	<.0001	<.0001	0.5476	0.2399	0.6299	0.892	0.4883	0.3766	<.0001	0.0756	0.0122	0.7479	0.0015
SBS5	0.8821	0.7404	0.6667	0.8375	0.0329	0.0195	0.0018	0.8978	<.0001	0.0084	0.0007	0.1485	0.023	0.3181	<.0001	<.0001	0.6077	0.036	0.0383	<.0001	0.7855	0.9694	<.0001	<.0001	0.0061	0.159	0.0001	0.7292	0.0468	<.0001	0.5575	0.8885	0.6064	<.0001	0.9181	0.0335	0.0001	0.5476	<.0001	0.0073	0.002	0.0003	0.8652	0.0945	0.3794	0.1751	0.6268	0.1336	0.2407
SBS6	0.664	0.854	0.4195	0.9956	<.0001	0.8143	0.1946	0.4059	0.0069	<.0001	0.3377	0.6599	0.463	0.401	0.0059	0.5556	0.5948	<.0001	<.0001	0.3951	0.7144	0.6374	<.0001	<.0001	0.3742	0.3341	<.0001	0.9689	0.6915	0.4251	0.9193	0.3777	0.6066	<.0001	<.0001	0.881	0.2523	0.2399	0.0073	<.0001	0.5524	0.3594	0.3661	0.7621	0.0582	0.2689	0.8196	0.119	0.7797
SBS7a	0.6588	0.0304	0.6757	0.709	0.22	<.0001	0.79	0.6774	0.0322	0.8756	<.0001	0.4484	0.599	0.3195	<.0001	0.8901	0.2402	0.2371	0.634	0.2762	0.7131	0.9588	0.0009	0.7638	0.8319	0.5342	0.0047	0.732	0.9168	0.9819	0.952	0.6711	0.652	<.0001	0.9606	<.0001	0.7385	0.6299	0.002	0.5524	<.0001	<.0001	0.873	0.897	0.2302	0.5191	0.8592	0.0062	0.8215
SBS7b	0.6804	0.0975	0.5676	0.6599	0.1119	0.0073	0.6132	0.7306	0.0011	0.6781	<.0001	0.5207	0.7081	0.3724	<.0001	0.7242	0.9349	0.1505	0.634	0.2135	0.8174	0.7648	<.0001	0.4765	0.8805	0.551	<.0001	0.5319	0.9514	0.852	0.9609	0.5348	0.5567	<.0001	0.9929	0.0103	0.0467	0.892	0.0003	0.3594	<.0001	<.0001	0.9869	0.6283	0.2362	0.6489	0.8355	0.0096	0.9
SBS7c	0.6949	0.6453	0.4845	0.649	0.5094	0.9621	0.5398	0.3472	0.7627	0.3148	0.8662	0.065	0.1444	0.7196	0.8071	0.4584	0.9142	0.4604	0.3217	0.7496	0.7094	0.4393	0.8746	0.4768	0.7191	0.5551	0.738	0.2053	0.4065	0.6577	0.739	0.5148	0.2233	0.584	0.5941	0.9361	0.5325	0.4883	0.8652	0.3661	0.873	0.9869	<.0001	0.3346	0.0384	0.0798	0.828	0.6749	0.7943
SBS7d	0.8825	0.6161	0.5325	0.7073	0.9526	0.7397	0.7872	0.3588	0.035	0.7418	0.7465	0.9145	0.3051	0.9904	0.7254	0.0005	0.7028	0.9691	0.9222	0.0771	0.8891	0.611	0.4743	0.7946	<.0001	0.5648	0.9414	0.4749	0.5615	0.0008	0.736	0.6298	0.8614	0.7774	0.638	0.685	0.7331	0.3766	0.0945	0.7621	0.897	0.6283	0.3346	<.0001	0.6833	0.4941	0.8588	0.724	0.6965
SBS8	<.0001	0.078	<.0001	<.0001	0.3288	0.3982	0.0003	<.0001	0.4318	0.2722	0.1875	<.0001	0.8445	0.2606	0.1521	0.3517	0.3013	0.148	0.3181	0.3478	0.2309	<.0001	0.751	0.8976	0.0846	0.0011	0.2211	<.0001	0.0001	0.0617	0.3071	0.0984	<.0001	0.0493	0.2237	0.463	0.0001	<.0001	0.3794	0.0582	0.2302	0.2362	0.0384	0.6833	<.0001	0.112	0.0289	0.4601	0.0039
SBS9	0.9092	0.1172	0.9416	0.3976	0.379	0.4507	0.4376	0.0344	0.0514	0.3591	0.5435	0.742	<.0001	0.0565	0.4716	0.0878	0.4094	0.5033	0.5497	0.0029	<.0001	0.9131	0.6297	0.6681	0.8012	0.4137	0.6094	0.0562	0.896	0.2865	0.6454	<.0001	0.2112	0.4778	0.3429	0.4957	0.4131	0.0756	0.1751	0.2689	0.5191	0.6489	0.0798	0.4941	0.112	<.0001	0.0679	0.6535	0.0015
SBS10a	<.0001	0.9829	<.0001	<.0001	0.6397	0.8439	0.2324	0.0075	0.0967	0.9803	0.8374	0.0001	0.0047	<.0001	0.8165	0.6975	0.7916	0.0095	0.601	0.4293	0.8588	<.0001	0.9527	0.7766	0.647	0.7327	0.7997	0.0928	0.1028	0.6712	0.9721	0.8338	0.0176	0.5879	0.8578	0.9686	0.9856	0.0122	0.6268	0.8196	0.8592	0.8355	0.828	0.8588	0.0289	0.0679	<.0001	0.0541	<.0001
SBS10b	0.4697	0.9863	0.583	0.2618	0.0025	0.0206	0.3314	0.6949	0.6538	0.1372	0.0004	0.9139	0.4407	<.0001	0.1213	0.5535	0.9827	0.2756	0.5643	0.9261	0.6246	0.3655	0.4989	0.4321	0.8408	0.5061	0.7893	0.8965	0.5787	0.9135	0.833	0.3886	0.5008	0.2216	0.0616	0.0302	0.1511	0.7479	0.1336	0.119	0.0062	0.0096	0.6749	0.724	0.4601	0.6535	0.0541	<.0001	0.0629
SBS10c	<.0001	0.3774	<.0001	<.0001	0.4763	0.9652	0.3027	0.0026	0.0043	0.5556	0.8434	<.0001	<.0001	<.0001	0.769	0.3389	0.8578	0.0009	0.4963	0.0426	0.2964	<.0001	0.8484	0.0978	0.7534	0.4339	0.7402	0.1049	0.0738	0.4501	0.6974	0.4404	0.0036	0.4936	0.904	0.8294	0.8495	0.0015	0.2407	0.7797	0.8215	0.9	0.7943	0.6965	0.0039	0.0015	<.0001	0.0629	<.0001
SBS10d	<.0001	0.2208	<.0001	<.0001	0.7672	0.9384	0.2526	0.0005	0.0884	0.7305	0.7133	<.0001	0.0013	<.0001	0.6218	0.6989	0.6497	0.0566	0.8866	0.3826	0.7946	<.0001	0.8241	0.9456	0.5009	0.6581	0.6288	0.0167	0.2304	0.5371	0.9118	0.7478	0.004	0.3904	0.6812	0.8291	0.985	0.0007	0.8123	0.549	0.7389	0.722	0.8467	0.8437	0.003	0.0409	<.0001	0.139	<.0001
SBS11	0.6648	0.3626	0.4494	0.5365	0.1687	0.0069	0.5666	0.8376	0.0009	0.0523	<.0001	0.6475	0.5294	0.8172	<.0001	0.9088	0.8825	0.001	0.0052	0.4281	0.8784	0.5217	<.0001	0.0299	0.9411	0.3908	<.0001	0.6852	0.8595	0.9025	0.9295	0.4295	0.4952	<.0001	0.7968	0.0067	0.0878	0.5517	<.0001	0.0073	<.0001	<.0001	0.7728	0.6279	0.1912	0.4899	0.8524	0.1223	0.7957
SBS12	0.4909	0.2315	0.2048	0.3225	0.6976	0.583	0.9342	0.0933	<.0001	0.7758	0.4216	0.6303	0.0086	0.5762	0.2477	<.0001	0.4198	0.2519	0.9109	<.0001	0.6502	0.1922	0.6405	0.0497	<.0001	0.3576	0.2428	0.0619	0.1785	<.0001	0.4796	0.6913	0.4503	0.2119	0.3638	0.6813	0.215	0.0855	<.0001	0.226	0.4743	0.4123	0.4807	0.0008	0.1331	0.0323	0.6547	0.5744	0.451
SBS13	0.7471	0.9534	0.7259	0.3678	0.646	0.1616	<.0001	0.9908	0.4033	0.4028	0.7059	0.7915	0.5103	0.7605	0.6072	0.2951	<.0001	0.542	0.5365	0.6998	0.5959	0.7132	0.7407	0.3548	0.3877	0.5025	0.6163	0.7381	0.621	0.5865	0.7335	0.4897	0.6537	0.3951	0.7192	0.8601	0.0121	0.951	0.879	0.5609	0.7627	0.6576	0.8601	0.666	0.4523	0.522	0.5216	0.8051	0.8069
SBS14	<.0001	0.0027	<.0001	<.0001	0.5313	0.7339	0.1123	<.0001	0.1506	0.0134	0.5575	<.0001	0.3068	<.0001	0.6446	0.9181	0.7288	<.0001	0.1808	0.6269	0.562	<.0001	0.8056	<.0001	0.9372	0.4621	0.7007	0.0021	0.3094	0.649	0.7429	0.4488	<.0001	0.5344	0.8979	0.7015	0.2899	<.0001	0.8363	0.8084	0.5913	0.5373	0.7391	0.8072	0.0001	0.9734	<.0001	0.469	<.0001
SBS15	0.245	0.6286	0.5763	0.3005	<.0001	0.6903	0.2147	0.9388	0.0603	<.0001	0.5522	0.9512	0.6915	0.4517	0.0486	0.7864	0.7578	<.0001	<.0001	0.5361	0.6492	0.4649	<.0001	0.0013	0.3672	0.3757	0.0005	0.235	0.9849	0.2564	0.9175	0.4759	0.2362	0.0213	<.0001	0.7011	0.3933	0.8703	0.2061	<.0001	0.5924	0.6987	0.4218	0.9046	0.4213	0.4006	0.8179	0.511	0.6743
SBS16	0.9888	0.538	0.7875	0.9736	0.9862	0.8405	0.146	0.8847	<.0001	0.6887	0.8185	0.1473	0.0137	0.9185	0.7861	0.0004	0.6873	0.5203	0.7984	<.0001	0.763	0.8877	0.486	0.4554	0.5047	0.954	0.7984	0.6808	0.1734	0.0004	0.9074	0.8365	0.8451	0.5003	0.5928	0.9155	0.0641	0.8741	<.0001	0.4847	0.8629	0.9201	0.8004	0.7183	0.7333	0.0774	0.9862	0.9931	0.5154
SBS17a	0.5895	0.4976	0.512	0.5882	0.7122	0.6875	0.502	0.5339	0.0734	0.6832	0.6899	0.6917	0.0461	0.6952	0.5396	0.0022	0.6801	0.516	0.7054	0.0181	0.0003	0.4825	0.6139	0.4389	0.5125	0.9014	0.5554	0.3509	0.555	0.1477	0.7603	0.4516	0.4331	0.3466	0.6988	0.7398	0.1813	0.4628	0.4644	0.5515	0.6732	0.696	0.1502	0.48	0.9957	0.0257	0.7807	0.6766	0.7186
SBS17b	0.6147	0.581	0.6065	0.6104	0.5773	0.737	0.7176	0.2555	0.9582	0.8236	0.6935	0.3992	<.0001	0.7138	0.6006	0.6361	0.7364	0.7014	0.7684	0.377	<.0001	0.5829	0.4707	0.5049	0.5981	0.6174	0.6094	0.4125	0.6422	0.7239	0.7068	<.0001	0.4437	0.8001	0.7302	0.7912	0.4404	0.3548	0.5586	0.599	0.7107	0.6509	0.8671	0.7424	0.263	<.0001	0.9004	0.9281	0.3322
SBS18	<.0001	0.0008	<.0001	<.0001	0.3441	0.9369	0.0195	<.0001	0.0578	0.5651	0.9357	<.0001	0.0863	<.0001	0.732	0.4211	0.9496	0.0005	0.486	0.4352	0.5181	<.0001	0.7679	0.3428	0.2054	0.3462	0.7236	<.0001	0.2179	0.1867	0.7688	0.2866	<.0001	0.6998	0.9263	0.9129	0.161	<.0001	0.7868	0.9775	0.9571	0.8577	0.5691	0.6037	<.0001	0.8591	<.0001	0.296	<.0001
SBS19	0.5967	0.6772	0.3955	0.6525	0.1695	0.046	0.2206	0.4844	0.0002	0.0765	<.0001	0.9411	0.7636	0.949	<.0001	0.4156	0.9614	0.0273	0.0513	0.0809	0.9793	0.5878	<.0001	0.043	0.8503	0.4758	<.0001	0.7942	0.7539	0.861	0.9755	0.5203	0.5199	<.0001	0.7818	0.0658	0.007	0.9159	<.0001	0.0124	0.0016	<.0001	0.9248	0.6293	0.4456	0.7944	0.8215	0.5853	0.7831
SBS20	<.0001	0.0001	0.0096	0.1524	0.3726	0.7516	0.1909	<.0001	0.0982	<.0001	0.9725	0.0089	0.972	0.8715	0.4545	0.4409	0.5691	<.0001	0.0181	0.5574	0.6703	0.1507	0.074	<.0001	0.9022	0.4811	0.2139	0.147	0.6025	0.2745	0.7259	0.5521	0.0272	0.3671	0.8358	0.7837	0.023	<.0001	0.2211	0.0387	0.9179	0.9616	0.916	0.8225	0.0335	0.4851	0.8761	0.8092	0.1262
SBS21	0.7383	0.5424	0.592	0.4801	0.9316	0.5777	0.2777	0.2541	0.0116	0.6969	0.5546	0.338	0.5192	0.8037	0.5552	<.0001	0.5382	0.771	0.1802	0.029	0.7613	0.4311	0.7557	0.5314	<.0001	0.392	0.663	0.283	0.4151	<.0001	0.6171	0.7537	0.8389	0.5172	0.7133	0.6583	0.8907	0.2363	0.0871	0.7224	0.5437	0.5505	0.9486	<.0001	0.1842	0.7119	0.7412	0.8416	0.6949
SBS22	0.2928	0.2464	0.2698	0.28	0.2157	0.4755	0.6837	0.4018	0.5532	0.1207	0.3967	0.1146	0.5588	0.3663	0.2792	0.2712	0.4779	0.1058	0.2103	0.9976	0.509	0.2944	0.2676	0.1159	0.2766	<.0001	0.328	0.2372	<.0001	0.209	<.0001	0.5822	0.1332	0.4119	0.4803	0.568	0.9131	0.2913	0.1303	0.2256	0.448	0.3884	0.4301	0.513	0.0016	0.5624	0.6125	0.4385	0.2782
SBS23	0.6247	0.8001	0.3742	0.5752	0.0696	0.4648	0.6504	0.6916	0.0002	0.0016	<.0001	0.4707	0.5178	0.887	<.0001	0.7612	0.7095	0.0009	<.0001	0.4004	0.713	0.5083	<.0001	0.0026	0.7756	0.4635	<.0001	0.7517	0.9221	0.9568	0.9866	0.383	0.4962	<.0001	0.9583	0.5409	0.0095	0.7369	0.0001	<.0001	0.004	<.0001	0.7399	0.9306	0.2247	0.6124	0.798	0.7766	0.7385
SBS24	<.0001	0.0307	<.0001	<.0001	0.7375	0.6079	0.1853	<.0001	0.3867	0.1478	0.8004	0.0002	0.5788	0.4707	0.5859	0.2979	0.7027	0.0018	0.0214	0.9928	0.3648	<.0001	0.3483	0.265	0.3085	0.2287	0.3488	<.0001	0.6102	0.1738	0.6976	0.1775	<.0001	0.7299	0.6614	0.5899	0.1804	<.0001	0.9252	0.2579	0.7801	0.8416	0.266	0.4718	<.0001	0.1622	0.2521	0.8127	0.2246
SBS25	0.217	0.3813	0.3658	0.2063	0.3126	0.7302	0.0696	0.0201	0.0011	0.6342	0.9304	<.0001	0.4999	0.1523	0.8753	0.1177	0.6423	0.5168	0.9342	0.0068	0.9958	0.2418	0.5279	0.3106	0.3396	<.0001	0.9056	0.6967	<.0001	0.1511	0.0025	0.5408	0.5872	0.5234	0.5311	0.8669	0.0243	0.0344	0.0467	0.6898	0.9166	0.949	0.4081	0.5598	0.0001	0.8958	0.1034	0.5786	0.0739
SBS26	0.4349	0.2426	0.1944	0.2812	0.9494	0.465	0.5414	0.0853	<.0001	0.6107	0.4031	0.378	0.004	0.6472	0.2776	<.0001	0.3927	0.4684	0.5808	<.0001	0.2807	0.1574	0.6637	0.0017	<.0001	0.2921	0.3038	0.0361	0.1816	<.0001	0.4709	0.3597	0.4088	0.1994	0.5835	0.5583	0.4528	0.0666	<.0001	0.4311	0.4254	0.3823	0.7896	0.0029	0.0551	0.0198	0.6293	0.6743	0.412
SBS27	0.7241	0.6309	0.7997	0.8302	0.7838	0.8976	0.5592	0.882	0.6921	0.6987	0.9724	0.6036	0.6672	0.8217	0.9465	0.452	0.7852	0.7211	0.8324	0.6245	0.5843	0.7554	0.9492	0.5755	0.5765	0.0003	0.9903	0.6782	0.0024	0.5653	<.0001	0.5005	0.6358	0.7601	0.8376	0.8517	0.5483	0.7006	0.557	0.9185	0.9518	0.9605	0.739	0.7361	0.3072	0.6452	0.9721	0.8331	0.6974
SBS28	0.5949	0.5827	0.5835	0.7605	0.611	0.768	0.6877	0.1809	0.7462	0.6946	0.7102	0.3328	<.0001	0.2933	0.5972	0.34	0.6993	0.5318	0.5481	0.7525	0.0004	0.5223	0.4176	0.3611	0.4286	0.4868	0.5883	0.2909	0.3455	0.3996	0.6192	<.0001	0.4567	0.5767	0.7644	0.8291	0.3703	0.2782	0.737	0.575	0.7497	0.6684	0.7981	0.6742	0.1968	<.0001	0.9911	0.1861	0.5184
SBS29	<.0001	0.0005	<.0001	<.0001	0.3395	0.6911	0.0432	<.0001	0.5012	0.2933	0.4093	<.0001	0.9396	0.0753	0.3056	0.2408	0.6304	0.0003	0.4114	0.9925	0.2843	<.0001	0.8351	0.1844	0.1662	0.233	0.3857	<.0001	0.9133	0.1295	0.7183	0.1219	<.0001	0.3156	0.6539	0.6929	0.1095	<.0001	0.5555	0.9439	0.4608	0.3641	0.2646	0.3806	<.0001	0.1462	0.0335	0.7774	0.0087
SBS30	0.5112	0.2753	0.3775	0.5791	0.0186	<.0001	0.2858	0.9448	<.0001	0.027	<.0001	0.518	0.5366	0.9137	<.0001	0.7695	0.703	0.0057	0.0625	0.1923	0.8758	0.6348	<.0001	0.0226	0.8727	0.3802	<.0001	0.8926	0.6165	0.8889	0.928	0.5605	0.582	<.0001	0.7199	<.0001	0.0646	0.5744	<.0001	0.0008	<.0001	<.0001	0.763	0.934	0.0947	0.4626	0.7358	0.2638	0.6084
SBS31	0.7506	0.8971	0.9384	0.9043	0.3727	0.7262	0.1618	0.0547	0.0007	0.7314	<.0001	0.1671	0.8862	0.8115	<.0001	0.2954	0.5973	0.1899	0.9398	0.0534	0.9346	0.9721	<.0001	0.1775	0.8471	0.4793	<.0001	0.8864	0.2039	0.9967	0.5831	0.5548	0.7433	<.0001	0.7209	0.7914	0.0002	0.1702	0.0023	0.6412	0.0169	<.0001	0.6366	0.846	0.2921	0.8215	0.7706	0.9952	0.9832
SBS32	0.9811	0.9611	0.7008	0.9186	0.0115	0.0341	0.1981	0.6643	0.0003	0.0084	0.0049	0.1181	0.5142	0.7149	<.0001	0.9901	0.7694	0.0004	0.0368	0.4771	0.7112	0.9332	<.0001	0.012	0.8088	0.3345	<.0001	0.9798	0.4141	0.7628	0.8868	0.286	0.6122	<.0001	0.2778	0.0364	0.1436	0.9252	<.0001	0.0003	0.008	0.0006	0.5413	0.3599	0.9388	0.2753	0.8977	0.2627	0.9979
SBS33	0.9923	0.6433	0.7029	0.904	0.9963	0.9566	0.599	0.4671	0.0694	0.6796	0.7571	0.3536	0.7277	0.9527	0.6401	<.0001	0.8228	0.7852	0.9267	0.0498	0.842	0.7582	0.8488	0.0269	0.001	0.4885	0.604	0.3557	0.8494	0.0023	0.6703	0.8118	0.6693	0.8344	0.8008	0.9769	0.9625	0.4114	0.0643	0.7341	0.8266	0.7095	0.8509	0.7188	0.2446	0.9927	0.9524	0.8104	0.5074
SBS34	0.491	0.5073	0.496	0.6052	0.7491	0.6656	0.3328	0.3343	0.6992	0.4982	0.6205	0.1593	0.3655	0.5888	0.4939	0.4451	0.663	0.3593	0.6381	0.5517	0.5114	0.5292	0.4581	0.3687	0.5952	0.1257	0.5136	0.2274	0.1905	0.3614	0.0599	0.5332	0.3871	0.7225	0.8584	0.733	0.1624	0.6533	0.322	0.6099	0.6662	0.6864	0.0646	0.6378	0.2008	0.3325	0.8038	0.6767	0.1669
SBS35	0.0005	0.0537	0.0095	0.1248	0.6087	0.7742	0.0021	<.0001	0.5435	0.6073	0.1787	<.0001	0.2854	0.9978	0.0133	0.1868	0.761	0.0014	0.8967	0.8364	0.5261	0.0637	0.0035	0.0267	0.1213	0.0002	0.0008	0.0041	0.0008	0.1213	0.0313	0.2787	0.0027	0.3503	0.2979	0.6769	<.0001	<.0001	0.7682	0.5785	0.5978	0.0042	0.8039	0.273	<.0001	0.1372	0.6903	0.6039	0.4003
SBS36	<.0001	0.0019	<.0001	<.0001	0.6412	0.8099	0.035	<.0001	0.0577	0.8714	0.7785	<.0001	0.027	<.0001	0.6459	0.5529	0.5701	0.0002	0.6526	0.3247	0.5155	<.0001	0.9883	0.3074	0.2895	0.4575	0.6189	<.0001	0.1787	0.3492	0.8486	0.3237	<.0001	0.4442	0.7187	0.9542	0.2908	<.0001	0.8086	0.5703	0.8315	0.7614	0.6147	0.6924	<.0001	0.4125	<.0001	0.2374	<.0001
SBS37	0.2323	0.0863	0.0839	0.1653	0.5437	0.4231	0.7666	0.0049	<.0001	0.2667	0.3028	0.254	<.0001	0.6398	0.165	<.0001	0.2815	0.1077	0.5777	<.0001	0.2615	0.0653	0.3684	0.8402	<.0001	0.1276	0.1695	0.0113	0.9651	<.0001	0.2928	0.0723	0.1273	0.1084	0.482	0.5374	0.4592	0.0083	<.0001	0.168	0.3396	0.3107	0.3956	0.0009	0.0121	<.0001	0.5729	0.7143	0.7782
SBS38	<.0001	<.0001	<.0001	0.0006	0.9075	0.8674	0.0814	<.0001	0.977	0.2106	0.8011	0.0002	0.9592	0.6593	0.6967	0.9768	0.831	0.0099	0.7473	0.5991	0.6905	<.0001	0.8849	0.0025	0.5424	0.6405	0.6615	<.0001	0.6222	0.7577	0.7638	0.58	0.0001	0.4426	0.7577	0.8911	0.0119	<.0001	0.612	0.7513	0.8314	0.7696	0.7172	0.937	0.0003	0.487	0.5574	0.9352	0.1112
SBS39	0.4167	0.2397	0.3211	0.3412	0.1557	0.8678	<.0001	0.819	0.8182	0.0917	0.2308	0.4729	0.0609	0.3519	0.1848	0.1224	<.0001	0.0831	0.1208	0.7593	0.3384	0.4247	0.308	0.1146	0.156	0.2034	0.2317	0.9235	0.2961	0.2515	0.3538	0.2619	0.2549	0.0517	0.3721	0.364	<.0001	0.5113	0.7737	0.1842	0.2732	0.2348	0.5693	0.5261	0.179	0.1319	0.6542	0.3409	0.1556
SBS40	<.0001	0.0876	0.0005	<.0001	0.6102	<.0001	<.0001	<.0001	<.0001	0.5517	0.0003	<.0001	0.0031	0.0382	0.0003	0.1238	0.0017	0.0711	0.7596	<.0001	0.2711	<.0001	0.0003	0.1221	0.2579	0.06	0.0108	0.0012	0.4286	0.8689	0.2278	0.1519	0.0004	0.0001	0.0213	0.0003	<.0001	<.0001	<.0001	0.5061	0.0001	0.0007	0.1368	0.6562	0.0011	0.0846	0.0079	0.5865	0.001
SBS41	0.2569	0.1405	0.1441	0.3315	0.6933	0.6128	0.3471	0.0116	0.2936	0.5403	0.7333	0.9393	<.0001	0.8442	0.5013	0.194	0.0153	0.2692	0.6657	0.07	0.6156	0.1502	0.6283	0.333	0.9613	0.9042	0.4773	0.0221	0.4328	0.7057	0.8577	0.0001	0.0645	0.5758	0.7325	0.895	0.7397	0.0355	0.2635	0.654	0.8384	0.6639	<.0001	0.2551	0.3228	<.0001	0.8676	0.6027	0.2621
SBS42	0.0485	0.3817	0.1381	0.1215	0.2474	0.866	0.2028	0.0019	0.0002	<.0001	0.017	0.222	0.662	0.333	<.0001	0.872	0.5262	<.0001	<.0001	0.2992	0.4391	0.2292	<.0001	<.0001	0.6482	0.9535	<.0001	0.0066	0.3117	0.7986	0.447	0.2099	0.1834	<.0001	0.4446	0.91	0.0062	0.0226	0.0006	<.0001	0.0882	0.0012	0.5429	0.9657	0.2962	0.4626	0.2331	0.6656	0.2282
SBS43	0.4912	0.3964	0.4983	0.5008	0.2729	0.5022	0.4611	0.1369	0.163	0.2283	0.4085	0.4043	0.6908	0.5197	0.2947	0.9461	0.4831	0.2274	0.5596	0.3361	0.6157	0.7625	0.2532	0.4916	0.5204	0.3675	0.3201	0.2695	0.4052	0.7393	0.7199	0.6875	0.5382	0.2703	0.53	0.5909	0.7182	0.2593	0.1725	0.2702	0.4562	0.403	0.5836	0.57	0.3315	0.8689	0.6788	0.5296	0.4569
SBS44	0.0317	0.3622	0.4352	0.4912	0.0137	0.5433	0.3006	0.2383	<.0001	<.0001	0.5724	0.2356	0.5775	0.711	0.0631	0.0141	0.4326	<.0001	<.0001	0.1134	0.5326	0.9361	0.0001	<.0001	0.0347	0.2754	0.0014	0.6657	0.2232	0.0041	0.8118	0.643	0.474	0.0023	0.3461	0.516	0.1182	0.226	<.0001	<.0001	0.5447	0.6361	0.801	0.5537	0.9096	0.9568	0.5895	0.9106	0.1015
SBS45	<.0001	<.0001	<.0001	<.0001	0.918	0.7615	0.0484	<.0001	0.9877	0.1158	0.5738	<.0001	0.9489	0.138	0.4712	0.8419	0.9342	0.0004	0.7863	0.6773	0.4505	<.0001	0.9836	<.0001	0.3646	0.5754	0.4743	<.0001	0.6531	0.5928	0.6956	0.3545	<.0001	0.2034	0.6843	0.7327	0.0043	<.0001	0.427	0.6149	0.6159	0.5575	0.6725	0.7694	<.0001	0.3798	0.0579	0.9879	0.0027
SBS46	0.9133	0.7067	0.5267	0.7399	0.9113	0.9018	0.5843	0.408	<.0001	0.8597	0.7298	0.9735	0.0323	0.683	0.9761	<.0001	0.6192	0.8451	0.5137	<.0001	0.0398	0.6107	0.7331	0.0115	<.0001	0.294	0.905	0.3205	0.383	<.0001	0.699	0.5648	0.7357	0.6289	0.5779	0.8614	0.1278	0.3567	0.0002	0.6331	0.7802	0.7483	0.5501	0.0003	0.2767	0.0568	0.7077	0.5748	0.5083
SBS47	0.6935	0.8309	0.9521	0.927	0.6832	0.1149	0.8206	0.9477	0.9344	0.2292	0.1699	0.042	0.2592	0.7726	0.2894	0.482	0.6884	0.4554	0.5632	0.9402	0.8704	0.6091	0.8496	0.2697	0.3981	0.4078	0.6824	0.7564	0.3442	0.3146	0.0081	0.697	0.2991	0.4223	0.5628	0.0785	0.6024	0.4641	0.8257	0.3518	0.1238	0.1658	0.8173	0.6927	0.1066	0.5171	0.7844	0.4831	0.7661
SBS48	0.7244	<.0001	0.6123	0.3653	0.6816	0.8412	0.1103	0.8247	0.2809	0.5896	0.7213	0.4506	0.3386	0.915	0.6595	0.445	0.9386	0.524	0.6497	0.4363	0.7036	0.5342	0.5646	0.5358	0.5463	0.6527	0.6882	0.6713	0.2127	0.4333	0.774	0.6051	0.7839	0.5295	0.7821	0.8255	0.0864	0.6852	0.2444	0.6428	0.758	0.7112	0.6483	0.7445	0.635	0.4066	0.969	0.7748	0.9876
SBS49	0.0015	<.0001	0.0816	0.098	0.6436	0.7274	0.687	0.038	0.262	0.9078	0.6378	0.3524	0.3559	0.8989	0.5685	0.5732	0.7635	0.9246	0.7364	0.5983	0.5622	0.0126	0.6642	0.4798	0.4849	0.584	0.5812	0.0103	0.4815	0.3955	0.7095	0.4912	0.039	0.3773	0.7306	0.7632	0.9549	0.0002	0.2572	0.6106	0.6793	0.6247	0.5924	0.7612	0.199	0.2791	0.9493	0.7454	0.8027
SBS50	0.2341	0.0901	0.4322	0.471	0.6626	0.0119	0.0061	0.0205	0.2033	0.4975	<.0001	0.0001	0.8155	0.9566	0.0031	0.7161	0.8335	0.6075	0.9284	0.4159	0.9396	0.1049	0.2317	0.4929	0.4087	0.2257	0.696	0.1014	0.4707	0.4563	0.6952	0.5171	<.0001	0.0313	0.7852	0.0082	0.0565	0.0197	0.2358	0.6841	<.0001	0.0009	0.5811	0.9426	0.0004	0.2193	0.8904	0.2723	0.9844
SBS51	0.2821	0.6888	0.7892	0.4912	0.9087	0.7261	0.0397	0.2507	0.2937	0.5349	0.7651	0.0015	0.7387	0.6748	0.8897	0.8704	0.6539	0.5395	0.4214	0.5529	0.8265	0.2054	0.8936	0.666	0.441	0.55	0.5833	0.7755	0.2974	0.4297	0.1081	0.7124	0.0176	0.9762	0.8664	0.6629	0.246	0.1498	0.5563	0.8123	0.8239	0.95	0.908	0.8752	0.0077	0.5705	0.7775	0.9685	0.8825
SBS52	<.0001	<.0001	<.0001	<.0001	0.93	0.9826	0.738	0.0021	0.5361	0.6518	0.671	0.0102	0.2691	0.0917	0.5937	0.6559	0.4988	0.991	0.8066	0.7927	0.6266	<.0001	0.7054	0.7055	0.4619	0.6305	0.6429	0.014	0.731	0.4525	0.8363	0.5251	0.0381	0.3746	0.7507	0.78	0.8597	0.0012	0.6087	0.581	0.6986	0.6966	0.6494	0.9325	0.0279	0.7458	0.0205	0.9477	0.0011
SBS53	<.0001	0.0011	0.0515	0.0692	0.9138	0.8463	0.4335	0.0079	0.7995	0.9127	0.892	0.0996	0.6033	0.753	0.7872	0.864	0.7515	0.6972	0.9652	0.6607	0.6572	0.0021	0.8739	0.6442	0.7093	0.6733	0.8773	0.0008	0.9115	0.6721	0.8098	0.5993	0.0263	0.6682	0.8667	0.8851	0.149	<.0001	0.7202	0.8459	0.8687	0.9171	0.6079	0.9429	0.0806	0.3864	0.7746	0.8634	0.9932
SBS54	0.6915	0.5836	0.5385	0.6425	0.9495	0.545	0.5621	0.562	0.0003	0.1549	0.5	0.4199	0.2679	0.7686	0.4467	<.0001	0.5666	0.6942	0.6864	0.0007	0.7316	0.5648	0.795	<.0001	0.0044	0.497	0.5159	0.2446	0.3736	<.0001	0.6451	0.5539	0.8829	0.4927	0.8615	0.61	0.8876	0.3647	<.0001	0.9086	0.5135	0.5121	0.5952	0.9376	0.2123	0.5159	0.8804	0.5865	0.5386
SBS55	0.5243	0.4519	0.4935	0.5319	0.5391	0.9779	0.3331	0.2658	0.4204	0.4866	0.8117	0.5345	0.8616	0.8678	0.7372	0.3048	0.722	0.4453	0.5884	0.3484	0.8663	0.7183	0.558	0.5058	0.5014	0.837	0.5977	0.2945	0.8285	0.4056	0.6761	0.6364	0.4264	0.781	0.7457	0.9522	0.9544	0.3808	0.6066	0.5881	0.8189	0.8678	0.678	0.9424	0.4025	0.8853	0.8407	0.9286	0.5628
SBS56	<.0001	0.1966	<.0001	<.0001	0.7273	0.9635	0.1768	0.0004	0.0683	0.9995	0.624	<.0001	0.0017	<.0001	0.5405	0.6522	0.6991	0.0052	0.8265	0.35	0.7142	<.0001	0.8208	0.4768	0.4827	0.6967	0.5751	0.0309	0.1535	0.6083	0.9087	0.8319	0.0029	0.3564	0.7363	0.7429	0.8935	0.0004	0.7204	0.6112	0.6537	0.629	0.7744	0.7867	0.0021	0.0539	<.0001	0.1299	<.0001
SBS57	0.9113	0.6388	0.5291	0.9845	0.579	0.4246	0.2536	0.4207	0.0024	0.9378	0.3354	0.4243	<.0001	0.5285	0.2164	0.0297	0.9645	0.8774	0.8231	0.0092	0.3655	0.5681	0.2249	0.8022	0.6611	0.4778	0.424	0.2182	0.3545	0.3038	0.7433	0.0001	0.6126	0.3298	0.8706	0.4376	0.1747	0.444	0.0022	0.7984	0.4113	0.1955	0.0009	0.3561	0.6705	<.0001	0.9809	0.3283	0.406
SBS58	0.6589	0.7243	0.7355	0.8472	0.3971	<.0001	0.0299	0.7527	0.0007	0.982	0.04	0.0346	0.1653	0.4246	0.0023	0.1947	0.6533	0.4701	0.8742	<.0001	0.6292	0.8746	0.0556	0.6099	0.9191	0.7087	0.3723	0.5901	0.0953	0.5464	0.8985	0.9484	0.3773	0.0032	0.9182	<.0001	0.0769	0.8319	<.0001	0.539	0.0332	0.0047	0.7724	0.3801	0.6534	0.5998	0.6619	0.0201	0.5565
SBS59	0.2413	0.7571	<.0001	0.0405	0.7324	0.7281	0.6886	0.0305	0.8671	0.8391	0.6502	0.1	0.9467	0.9101	0.6189	0.5548	0.7295	0.002	0.3691	0.8441	0.9364	0.0001	0.7498	0.9849	0.5933	0.5757	0.6398	<.0001	0.9637	0.5008	0.8952	0.7482	<.0001	0.8274	0.7369	0.7761	0.9835	0.1965	0.7092	0.6171	0.6907	0.6435	0.6502	0.6996	0.0712	0.9791	0.9812	0.7741	0.9097
SBS60	0.6409	0.6565	0.6567	0.6827	0.6248	0.7906	0.3658	0.3649	0.3783	0.5875	0.7679	0.5398	0.7916	0.8069	0.6991	0.3773	0.7612	0.5803	0.7377	0.2533	0.9716	0.9025	0.6704	0.5672	0.5524	0.6573	0.7025	0.5244	0.7486	0.4626	0.8297	0.8839	0.6126	0.6733	0.8237	0.836	0.9436	0.4956	0.4533	0.6763	0.7723	0.7806	0.8634	0.8128	0.4824	0.8299	0.8536	0.8719	0.6193
SBS84	0.6101	0.5883	0.4652	0.5452	0.2274	0.9909	0.083	0.939	0.0008	<.0001	0.1122	0.6115	0.486	0.8072	<.0001	0.7673	0.6265	<.0001	<.0001	0.8465	0.4652	0.4183	<.0001	<.0001	0.8766	0.2715	<.0001	0.644	0.6436	0.9964	0.884	0.345	0.6211	<.0001	0.7156	0.9481	0.0324	0.4698	0.0005	<.0001	0.2651	0.0317	0.5869	0.5916	0.2559	0.6542	0.8145	0.7786	0.6645
SBS85	0.3012	0.1267	0.153	0.2804	0.3508	0.6978	0.6645	0.028	0.0988	0.0805	0.7021	0.2424	0.0104	0.6284	0.5439	0.0118	0.5649	0.1248	0.3202	0.0179	0.6845	0.1624	0.3812	0.1369	0.024	0.2731	0.2351	0.0267	0.0636	0.0318	0.0279	0.852	0.1262	0.4077	0.3519	0.5695	0.5943	0.1153	0.1623	0.119	0.8069	0.7742	<.0001	<.0001	0.4544	0.0082	0.6897	0.9906	0.5504
SBS86	0.4689	0.4425	0.5376	0.6312	0.9132	0.3957	<.0001	0.5721	0.5541	0.4304	0.7357	0.3144	0.0738	0.8432	0.5474	0.0581	<.0001	0.3616	0.3808	0.4307	0.3533	0.5802	0.589	0.1651	0.2945	0.2007	0.4395	0.9788	0.3466	0.2511	0.4706	0.205	0.3435	0.3259	0.7984	0.991	0.0007	0.36	0.9365	0.6694	0.8235	0.6237	0.4342	0.6208	0.0987	0.1304	0.9269	0.9655	0.3642
SBS87	0.5839	0.3023	0.5474	0.9334	<.0001	0.9142	0.0407	0.3899	0.8273	<.0001	0.6362	0.7828	0.3912	0.3316	0.952	0.1722	0.7902	0.2762	0.7645	0.1061	0.7916	0.9471	0.4104	0.1976	0.6744	0.6351	0.8725	0.3258	0.8847	0.7913	0.9848	0.3853	0.4745	0.777	<.0001	0.8509	0.0095	0.3831	0.8436	<.0001	0.9865	0.6733	0.649	0.7353	0.2032	0.2509	0.7687	0.0542	0.6932
SBS88	0.4981	0.2081	0.4326	0.6888	0.9297	0.469	0.8722	0.0745	0.0021	0.4202	0.3967	0.2457	<.0001	0.6743	0.2372	0.0516	0.4961	0.2858	0.5694	<.0001	0.8877	0.4326	0.6326	0.465	0.6306	0.8251	0.2983	0.115	0.3982	0.0506	0.979	0.0117	0.3666	0.1871	0.9303	0.5212	0.884	0.1258	0.0002	0.452	0.4193	0.372	0.0013	0.25	0.8748	<.0001	0.917	0.6834	0.3561
SBS89	0.0142	0.5544	0.1857	0.0704	0.7362	0.7633	<.0001	0.0001	0.0117	0.7002	0.8696	<.0001	0.6062	0.826	0.404	0.453	0.0242	0.3864	0.3642	0.1285	0.2877	0.046	0.283	0.3704	0.0776	0.002	0.6387	0.1474	<.0001	0.2252	0.0335	0.1461	0.0571	0.1774	0.3387	0.8761	<.0001	0.0002	0.0074	0.9819	0.9161	0.9356	0.5223	0.4807	0.0001	0.154	0.3011	0.4833	0.5414
SBS90	0.5048	0.4454	0.4652	0.5451	0.4764	0.6777	0.634	0.3854	0.5141	0.2678	0.6001	0.1502	0.2882	0.6206	0.4531	0.4651	0.6385	0.2831	0.3389	0.6005	0.9244	0.4683	0.4303	0.236	0.4388	0.009	0.4664	0.1995	0.0093	0.2867	<.0001	0.8349	0.2361	0.4824	0.7041	0.7531	0.4297	0.7881	0.2384	0.4005	0.6346	0.5736	<.0001	0.9	0.0926	0.1975	0.8018	0.703	0.8121
SBS91	0.0019	<.0001	0.0013	<.0001	0.9486	0.5935	0.806	0.0168	0.7385	0.5642	0.8931	0.088	0.59	0.0649	0.6486	0.4877	0.5621	0.9061	0.7305	0.9982	0.63	0.0014	0.769	0.5263	0.3639	0.5593	0.7285	0.0547	0.5564	0.3112	0.8292	0.4718	0.0781	0.8266	0.7225	0.7564	0.3877	0.0243	0.6121	0.665	0.9874	0.7866	0.5974	0.7963	0.1501	0.9882	0.013	0.9925	0.0032
SBS92	0.2399	0.7714	0.7205	0.4048	0.1789	0.1066	0.0112	0.0733	<.0001	0.245	0.0104	0.0379	0.123	0.8813	0.0005	<.0001	0.1239	0.2078	0.4419	<.0001	0.4947	0.5484	<.0001	0.0037	0.0135	0.9383	0.0001	0.7598	0.0046	<.0001	0.9415	0.1866	0.3216	0.0016	0.733	0.2182	<.0001	0.18	<.0001	0.3875	0.0484	0.0002	0.8783	0.1685	0.604	0.6334	0.6817	0.8834	0.1962
SBS93	0.7635	0.2746	0.3147	0.5793	0.9147	0.9139	0.3142	0.0972	0.0553	0.5921	0.6825	0.7586	<.0001	0.6874	0.3755	0.0252	0.2378	0.3784	0.3443	0.0008	0.0045	0.2681	0.5396	0.361	0.6681	0.8228	0.2996	0.0463	0.2297	0.2462	0.9732	<.0001	0.3271	0.3541	0.9163	0.9232	0.2884	0.236	0.1194	0.5247	0.7502	0.6237	0.0045	0.2834	0.7009	<.0001	0.995	0.5343	0.3154
SBS94	<.0001	0.0002	0.0002	0.0008	0.1158	0.7477	0.0005	<.0001	0.0387	0.0317	0.2194	<.0001	0.9343	0.9267	0.1027	0.5433	0.8758	0.0067	0.3525	0.0502	0.5356	<.0001	0.0102	0.002	0.4556	0.7967	0.1472	<.0001	0.2041	0.8303	0.7615	0.1441	<.0001	0.5072	0.395	0.8212	<.0001	<.0001	0.1639	0.3818	0.3361	0.109	0.5086	0.6014	<.0001	0.3458	0.8923	0.7967	0.1863
[truncated: 63 more columns]

## Sheet: README 
Supplemental Table S5. Pearson’s correlation coefficient Each value indicates a correlation coefficient (r) between factors in rows and columns. The p-values are presented in the next sheet. Y4tumor: Total somatic mutations detected in four KBrO3-treated Mutyh−/− tumors (in this study). TOY: De novo germline mutations in the TOY mouse line (Ohno et al. 2014 Sci. Rep.) rpsL: Mutations detected in …
